# Supplementary material for: Volatile DMNT directly protects plants against Plutella xylostella by disrupting the peritrophic matrix barrier in insect midgut
Source: eLife. 2021 Feb 18;10:e63938. doi: 10.7554/eLife.63938 (PMC7924945; doi:10.7554/eLife.63938)
Supplement: Figure 1—figure supplement 1—source data 1. [file elife-63938-fig1-figsupp1-data1.xlsx]

## Sheet: Sheet1
Figure 1-figure supplement 1A-B														Figure 1-figure supplement 1C
														DMNT standard (ng)	20	40	60	80	100
														Response value	1047173	2858154	5005018	6366334	8216412
														Figure 1-figure supplement 1D
															Response value	Relative content of DMNT(ng)	fresh weight(g)	normalized to fresh weight(ng/g)	average	SD	SE
														35Spro:PEN1-3h-1	262415	10.2854	1.0027	10.2577	10.3392	0.39777	0.281308
														35Spro:PEN1-3h-2	282342	10.5087	1.0617	9.89797
														35Spro:PEN1-3h-3	435609	12.2263	1.1256	10.862
														35Spro:PEN1-12h-1	1014310	18.7116	0.9524	19.6467	20.1114	1.02616	0.725711
														35Spro:PEN1-12h-2	1108232	19.7641	1.0319	19.1531
														35Spro:PEN1-12h-3	1352667	22.5034	1.045	21.5344
														35Spro:PEN1-21h-1	4589159	58.7735	0.9513	61.7823	68.3712	10.9222	7.72431
														35Spro:PEN1-21h-2	6913352	84.8199	1.0126	83.7644
														35Spro:PEN1-21h-3	3078106	41.8397	0.7024	59.5668
