# Supplementary material for: Volatile DMNT directly protects plants against Plutella xylostella by disrupting the peritrophic matrix barrier in insect midgut
Source: eLife. 2021 Feb 18;10:e63938. doi: 10.7554/eLife.63938 (PMC7924945; doi:10.7554/eLife.63938)
Supplement: Figure 1—figure supplement 3—source data 1. [file elife-63938-fig1-figsupp3-data1.xlsx]

## Sheet: Sheet1
Figure 1-figure supplement 3A DMNT shows no dosage-dependent effects on the end of survival
Survival (%)	24h					48h					72h					144h
	number	percentage	average	SD	SE	number	percentage	average	SD	SE	number	percentage	average	SD	SE	number	percentage	average	SD	SE
Control-1	15	1	0.911111	0.106574	0.0476628	14	0.933333	0.888889	0.11967	0.0535198	12	0.8	0.8	0.127657	0.0570917	12	0.8	0.777778	0.113312	0.050676
Control-2	12	0.8				12	0.8				9	0.6				9	0.6
Control-3	15	1				15	1				14	0.933333				14	0.933333
Control-4	15	1				15	1				14	0.933333				12	0.8
Control-5	11	0.733333				10	0.666667				10	0.666667				10	0.666667
Control-6	14	0.933333				14	0.933333				13	0.866667				13	0.866667
DMNT（ 0.7 μm）-1	14	0.933333	0.844444	0.0916246	0.040977	14	0.933333	0.777778	0.125708	0.05622	14	0.933333	0.733333	0.133333	0.0596303	7	0.466667	0.544444	0.135628	0.0606567
DMNT（ 0.7 μm）-2	14	0.933333				12	0.8				11	0.733333				10	0.666667
DMNT（ 0.7 μm）-3	13	0.866667				12	0.8				12	0.8				9	0.6
DMNT（ 0.7 μm）-4	10	0.666667				8	0.533333				8	0.533333				5	0.333333
DMNT（ 0.7 μm）-5	12	0.8				11	0.733333				9	0.6				7	0.466667
DMNT（ 0.7 μm）-6	13	0.866667				13	0.866667				12	0.8				11	0.733333
DMNT（7 μm）-1	11	0.733333	0.677778	0.0458123	0.0204885	11	0.733333	0.633333	0.0922958	0.0412772	11	0.733333	0.577778	0.125708	0.05622	7	0.466667	0.444444	0.147406	0.0659238
DMNT（7 μm）-2	10	0.666667				9	0.6				9	0.6				7	0.466667
DMNT（7 μm）-3	10	0.666667				9	0.6				9	0.6				8	0.533333
DMNT（7 μm）-4	11	0.733333				11	0.733333				10	0.666667				10	0.666667
DMNT（7 μm）-5	10	0.666667				10	0.666667				8	0.533333				5	0.333333
DMNT（7 μm）-6	9	0.6				7	0.466667				5	0.333333				3	0.2
DMNT（70 μm）-1	11	0.733333	0.744444	0.182236	0.0815008	8	0.533333	0.6	0.127657	0.0570917	6	0.4	0.566667	0.152753	0.0683151	5	0.333333	0.433333	0.17533	0.0784125
DMNT（70 μm）-2	9	0.6				8	0.533333				7	0.466667				4	0.266667
DMNT（70 μm）-3	7	0.466667				6	0.4				6	0.4				4	0.266667
DMNT（70 μm）-4	11	0.733333				10	0.666667				10	0.666667				9	0.6
DMNT（70 μm）-5	14	0.933333				10	0.666667				10	0.666667				6	0.4
DMNT（70 μm）-6	15	1				12	0.8				12	0.8				11	0.733333
Figure 1-figure supplement 3B DMNT shows no dosage-dependent effects on the end of pupation
Pupation(%)	120h					144h
	number	percentage	average	SD	SE	number	percentage	average	SD	SE
Control-1	9	0.6	0.688889	0.179161	0.0801258	12	0.8	0.777778	0.113312	0.050676
Control-2	6	0.4				9	0.6
Control-3	14	0.933333				14	0.933333
Control-4	11	0.733333				12	0.8
Control-5	9	0.6				10	0.666667
Control-6	13	0.866667				13	0.866667
DMNT（ 0.7 μm）-1	4	0.266667	0.433333	0.131937	0.0590059	7	0.466667	0.544444	0.135628	0.0606567
DMNT（ 0.7 μm）-2	8	0.533333				10	0.666667
DMNT（ 0.7 μm）-3	8	0.533333				9	0.6
DMNT（ 0.7 μm）-4	4	0.266667				5	0.333333
DMNT（ 0.7 μm）-5	6	0.4				7	0.466667
DMNT（ 0.7 μm）-6	9	0.6				11	0.733333
DMNT（7 μm）-1	5	0.333333	0.311111	0.142292	0.0636367	7	0.466667	0.444444	0.147406	0.0659238
DMNT（7 μm）-2	5	0.333333				7	0.466667
DMNT（7 μm）-3	7	0.466667				8	0.533333
DMNT（7 μm）-4	7	0.466667				10	0.666667
DMNT（7 μm）-5	3	0.2				5	0.333333
DMNT（7 μm）-6	1	0.0666667				3	0.2
DMNT（70 μm）-1	3	0.2	0.322222	0.208759	0.0933626	5	0.333333	0.433333	0.17533	0.0784125
DMNT（70 μm）-2	3	0.2				4	0.266667
DMNT（70 μm）-3	1	0.0666667				4	0.266667
DMNT（70 μm）-4	8	0.533333				9	0.6
DMNT（70 μm）-5	4	0.266667				6	0.4
DMNT（70 μm）-6	10	0.666667				11	0.733333
