# Supplementary material for: Volatile DMNT directly protects plants against Plutella xylostella by disrupting the peritrophic matrix barrier in insect midgut
Source: eLife. 2021 Feb 18;10:e63938. doi: 10.7554/eLife.63938 (PMC7924945; doi:10.7554/eLife.63938)
Supplement: Figure 1—figure supplement 4—source data 1. [file elife-63938-fig1-figsupp4-data1.xlsx]

## Sheet: Sheet1
Figure 1-figure supplement 4 DMNT treatment affects P. xylostella larvae of different ages
A	Survival (%)	24h					48h					72h					96h
	1st instar	number	percentage	average	SD	SE	number	percentage	average	SD	SE	number	percentage	average	SD	SE	number	percentage	average	SD	SE
	Control-1	13	0.866667	0.922222	0.0458123	0.0204885	12	0.8	0.822222	0.031427	0.014055	12	0.8	0.8	0.03849	0.0172138	12	0.8	0.8	0.03849	0.0172138
	Control-2	14	0.933333				12	0.8				12	0.8				12	0.8
	Control-3	14	0.933333				12	0.8				12	0.8				12	0.8
	Control-4	14	0.933333				13	0.866667				13	0.866667				13	0.866667
	Control-5	15	1				13	0.866667				12	0.8				12	0.8
	Control-6	13	0.866667				12	0.8				11	0.733333				11	0.733333
	DMNT-1	11	0.733333	0.766667	0.0922958	0.0412772	11	0.733333	0.611111	0.135628	0.0606567	11	0.733333	0.6	0.138778	0.0620652	10	0.666667	0.577778	0.11967	0.0535198
	DMNT-2	11	0.733333				10	0.666667				10	0.666667				10	0.666667
	DMNT-3	12	0.8				8	0.533333				8	0.533333				8	0.533333
	DMNT-4	13	0.866667				8	0.533333				9	0.6				9	0.6
	DMNT-5	13	0.866667				12	0.8				11	0.733333				10	0.666667
	DMNT-6	9	0.6				6	0.4				5	0.333333				5	0.333333
	Survival (%)	24h					48h					72h
	2st instar	number	percentage	average	SD	SE	number	percentage	average	SD	SE	number	percentage	average	SD	SE
	Control-1	15	1	0.977778	0.031427	0.014055	15	1	0.922222	0.0458123	0.0204885	14	0.933333	0.9	0.0333333	0.0149076
	Control-2	15	1				14	0.933333				13	0.866667
	Control-3	14	0.933333				13	0.866667				13	0.866667
	Control-4	15	1				13	0.866667				13	0.866667
	Control-5	15	1				14	0.933333				14	0.933333
	Control-6	14	0.933333				14	0.933333				14	0.933333
	DMNT-1	13	0.866667	0.888889	0.0628539	0.02811	13	0.866667	0.8	0.0942809	0.042165	10	0.666667	0.733333	0.0942809	0.042165
	DMNT-2	15	1				12	0.8				10	0.666667
	DMNT-3	14	0.933333				13	0.866667				13	0.866667
	DMNT-4	13	0.866667				13	0.866667				12	0.8
	DMNT-5	13	0.866667				9	0.6				9	0.6
	DMNT-6	12	0.8				12	0.8				12	0.8
	Survival (%)	24h					48h						Survival (%)	24h
	3st instar	number	percentage	average	SD	SE	number	percentage	average	SD	SE		4st instar	number	percentage	average	SD	SE
	Control-1	15	1	1	0	0	15	1	0.988889	0.0248452	0.0111114		Control-1	15	1	1	0	0
	Control-2	15	1				14	0.933333					Control-2	15	1
	Control-3	15	1				15	1					Control-3	15	1
	Control-4	15	1				15	1					Control-4	15	1
	Control-5	15	1				15	1					Control-5	15	1
	Control-6	15	1				15	1					Control-6	15	1
	DMNT-1	15	1	0.977778	0.031427	0.014055	15	1	0.833333	0.137437	0.0614655		DMNT-1	15	1	0.988889	0.0248452	0.0111114
	DMNT-2	15	1				15	1					DMNT-2	15	1
	DMNT-3	14	0.933333				10	0.666667					DMNT-3	14	0.933333
	DMNT-4	15	1				13	0.866667					DMNT-4	15	1
	DMNT-5	15	1				10	0.666667					DMNT-5	15	1
	DMNT-6	14	0.933333				12	0.8					DMNT-6	15	1
B	1st instar	0h				24h				48h				72h				96h
		Growth (g)	average	SD	SE	Growth (g)	average	SD	SE	Growth (g)	average	SD	SE	Growth (g)	average	SD	SE	Growth (g)	average	SD	SE
	Control-1	0.0026	0.0025	0.000208167	9.30978e-05	0.0031	0.00353333	0.000381517	0.000170625	0.0066	0.01095	0.00200562	0.000896967	0.0286	0.0334	0.00292973	0.00131026	0.0674	0.0764833	0.0069141	0.00309217
	Control-2	0.0023				0.0032				0.0114				0.0375				0.0903
	Control-3	0.0025				0.0036				0.0117				0.0336				0.0733
	Control-4	0.0023				0.0042				0.0121				0.0362				0.0764
	Control-5	0.0029				0.0038				0.0127				0.033				0.0747
	Control-6	0.0024				0.0033				0.0112				0.0315				0.0768
	DMNT-1	0.0025	0.00248333	0.000177169	7.92348e-05	0.0033	0.00303333	0.000521749	0.00023334	0.0094	0.00768333	0.00197435	0.000882983	0.0292	0.0224	0.00583067	0.00260763	0.0542	0.0426833	0.0107468	0.00480628
	DMNT-2	0.0023				0.0031				0.0083				0.0257				0.057
	DMNT-3	0.0026				0.0032				0.0064				0.0198				0.0393
	DMNT-4	0.0026				0.0032				0.0055				0.019				0.0338
	DMNT-5	0.0022				0.0035				0.0108				0.0281				0.0452
	DMNT-6	0.0027				0.0019				0.0057				0.0126				0.0266
	2st instar	0h				24h				48h				72h
		Growth (g)	average	SD	SE	Growth (g)	average	SD	SE	Growth (g)	average	SD	SE	Growth (g)	average	SD	SE
	Control-1	0.0053	0.00563333	0.000298142	0.000133337	0.0205	0.0177333	0.00131233	0.000586912	0.0437	0.03735	0.00320299	0.00143247	0.1107	0.10555	0.00744105	0.00332784
	Control-2	0.0059				0.0177				0.0372				0.107
	Control-3	0.0061				0.0169				0.0366				0.0998
	Control-4	0.0053				0.0173				0.034				0.0967
	Control-5	0.0057				0.0164				0.0344				0.1006
	Control-6	0.0055				0.0176				0.0382				0.1185
	DMNT-1	0.0056	0.00558333	0.000429793	0.000192215	0.0127	0.0146167	0.00167672	0.000749875	0.0288	0.02715	0.00560796	0.00250803	0.0417	0.0529167	0.0114341	0.00511363
	DMNT-2	0.0053				0.0178				0.0223				0.0426
	DMNT-3	0.0052				0.015				0.0325				0.0625
	DMNT-4	0.0054				0.0152				0.032				0.059
	DMNT-5	0.0055				0.0133				0.0171				0.0416
	DMNT-6	0.0065				0.0137				0.0302				0.0701
	3st instar	0h				24h				48h					4st instar	0h				24h
		Growth (g)	average	SD	SE	Growth (g)	average	SD	SE	Growth (g)	average	SD	SE			Growth (g)	average	SD	SE	Growth (g)	average	SD	SE
	Control-1	0.0123	0.0125833	0.000338707	0.000151479	0.0278	0.03	0.00222036	0.000993006	0.1401	0.120583	0.00991924	0.00443616		Control-1	0.031	0.0280667	0.00153587	0.000686882	0.1591	0.15005	0.00605853	0.00270954
	Control-2	0.0132				0.0331				0.1149					Control-2	0.0276				0.1433
	Control-3	0.0122				0.0295				0.121					Control-3	0.029				0.1562
	Control-4	0.0128				0.032				0.1139					Control-4	0.0264				0.1499
	Control-5	0.0124				0.0268				0.124					Control-5	0.0269				0.1491
	Control-6	0.0126				0.0308				0.1096					Control-6	0.0275				0.1427
	DMNT-1	0.0125	0.0124667	0.000179505	8.02797e-05	0.0312	0.0301833	0.00290483	0.00129912	0.093	0.0604	0.0226054	0.0101097		DMNT-1	0.0264	0.0273333	0.000642045	0.00028714	0.1247	0.131067	0.00792142	0.00354267
	DMNT-2	0.0124				0.0323				0.0762					DMNT-2	0.027				0.128
	DMNT-3	0.0128				0.0294				0.0251					DMNT-3	0.0276				0.1459
	DMNT-4	0.0125				0.0282				0.0565					DMNT-4	0.0274				0.1373
	DMNT-5	0.0122				0.0255				0.0408					DMNT-5	0.0271				0.1253
	DMNT-6	0.0124				0.0345				0.0708					DMNT-6	0.0285				0.1252
	Pupation(%)							Pupation(%)							Pupation(%)							Pupation(%)
C	1st instar	number	percentage	average	SD	SE		2st instar	number	percentage	average	SD	SE		3st instar	number	percentage	average	SD	SE		4st instar	number	percentage	average	SD	SE
	Control-1	12	0.8	0.688889	0.0628539	0.02811		Control-1	12	0.8	0.844444	0.0496904	0.0222229		Control-1	14	0.933333	0.955556	0.031427	0.014055		Control-1	15	1	1	0	0
	Control-2	10	0.666667					Control-2	13	0.866667					Control-2	14	0.933333					Control-2	15	1
	Control-3	9	0.6					Control-3	12	0.8					Control-3	14	0.933333					Control-3	15	1
	Control-4	11	0.733333					Control-4	12	0.8					Control-4	15	1					Control-4	15	1
	Control-5	10	0.666667					Control-5	13	0.866667					Control-5	14	0.933333					Control-5	15	1
	Control-6	10	0.666667					Control-6	14	0.933333					Control-6	15	1					Control-6	15	1
	DMNT-1	10	0.666667	0.488889	0.106574	0.0476628		DMNT-1	7	0.466667	0.433333	0.083887	0.0375166		DMNT-1	13	0.866667	0.622222	0.142292	0.0636367		DMNT-1	12	0.8	0.844444	0.0496904	0.0222229
	DMNT-2	8	0.533333					DMNT-2	8	0.533333					DMNT-2	10	0.666667					DMNT-2	13	0.866667
	DMNT-3	6	0.4					DMNT-3	7	0.466667					DMNT-3	9	0.6					DMNT-3	13	0.866667
	DMNT-4	7	0.466667					DMNT-4	7	0.466667					DMNT-4	10	0.666667					DMNT-4	14	0.933333
	DMNT-5	8	0.533333					DMNT-5	4	0.266667					DMNT-5	6	0.4					DMNT-5	12	0.8
	DMNT-6	5	0.333333					DMNT-6	6	0.4					DMNT-6	8	0.533333					DMNT-6	12	0.8
	Eclosion(%)							Eclosion(%)							Eclosion(%)							Eclosion(%)
D	1st instar	number	percentage	average	SD	SE		2st instar	number	percentage	average	SD	SE		3st instar	number	percentage	average	SD	SE		4st instar	number	percentage	average	SD	SE
	Control-1	12	0.8	0.633333	0.0922958	0.0412772		Control-1	12	0.8	0.777778	0.0831479	0.037186		Control-1	14	0.933333	0.933333	1.11022e-16	4.96522e-17		Control-1	15	1	0.977778	0.031427	0.014055
	Control-2	8	0.533333					Control-2	12	0.8					Control-2	14	0.933333					Control-2	15	1
	Control-3	8	0.533333					Control-3	11	0.733333					Control-3	14	0.933333					Control-3	15	1
	Control-4	10	0.666667					Control-4	11	0.733333					Control-4	14	0.933333					Control-4	15	1
	Control-5	10	0.666667					Control-5	10	0.666667					Control-5	14	0.933333					Control-5	14	0.933333
	Control-6	9	0.6					Control-6	14	0.933333					Control-6	14	0.933333					Control-6	14	0.933333
	DMNT-1	9	0.6	0.433333	0.113855	0.0509191		DMNT-1	4	0.266667	0.333333	0.0666667	0.0298151		DMNT-1	12	0.8	0.488889	0.209644	0.0937585		DMNT-1	11	0.733333	0.811111	0.0711458	0.0318183
	DMNT-2	7	0.466667					DMNT-2	6	0.4					DMNT-2	9	0.6					DMNT-2	12	0.8
	DMNT-3	6	0.4					DMNT-3	4	0.266667					DMNT-3	2	0.133333					DMNT-3	13	0.866667
	DMNT-4	5	0.333333					DMNT-4	6	0.4					DMNT-4	8	0.533333					DMNT-4	14	0.933333
	DMNT-5	8	0.533333					DMNT-5	4	0.266667					DMNT-5	5	0.333333					DMNT-5	12	0.8
	DMNT-6	4	0.266667					DMNT-6	6	0.4					DMNT-6	8	0.533333					DMNT-6	11	0.733333
