# Supplementary material for: Volatile DMNT directly protects plants against Plutella xylostella by disrupting the peritrophic matrix barrier in insect midgut
Source: eLife. 2021 Feb 18;10:e63938. doi: 10.7554/eLife.63938 (PMC7924945; doi:10.7554/eLife.63938)
Supplement: Figure 1—figure supplement 5—source data 1. [file elife-63938-fig1-figsupp5-data1.xlsx]

## Sheet: Sheet1
Figure 1-figure supplement 5C Reduced forage intake in P. xylostella larvae fed with DMNT
	24h				48h				72h
	forage intake (g)	average	SD	SE	forage intake (g)	average	SD	SE	forage intake (g)	average	SD	SE
Control-1	0.04084	0.05394	0.0130687	0.00584466	0.0909	0.118383	0.0301407	0.0134797	0.3063	0.319667	0.031389	0.014038
Control-2	0.03354				0.08616				0.3103
Control-3	0.06654				0.16606				0.3472
Control-4	0.05194				0.09746				0.2956
Control-5	0.06294				0.12066				0.3747
Control-6	0.06784				0.14906				0.2839
DMNT-1	0.08126	0.04346	0.0228759	0.0102307	0.0895	0.07875	0.0181994	0.00813928	0.29392	0.208453	0.0597587	0.0267257
DMNT-2	0.06336				0.0989				0.22992
DMNT-3	0.01796				0.054				0.16672
DMNT-4	0.04066				0.0765				0.16862
DMNT-5	0.01816				0.0563				0.12502
DMNT-6	0.03936				0.0973				0.26652
Figure 1-figure supplement 5D Reduced defecation in P. xylostella larvae fed with DMNT
	24h				48h				72h
	defecation(g)	average	SD	SE	defecation(g)	average	SD	SE	defecation(g)	average	SD	SE
Control-1	0.0157	0.0110833	0.00309646	0.00138482	0.0217	0.0199	0.00136748	0.000611574	0.0421	0.0514833	0.00769966	0.0034435
Control-2	0.0113				0.0188				0.0506
Control-3	0.0077				0.0199				0.0567
Control-4	0.0085				0.0182				0.044
Control-5	0.0087				0.0191				0.065
Control-6	0.0146				0.0217				0.0505
DMNT-1	0.008	0.00875	0.000411299	0.000183944	0.0177	0.0169	0.00107393	0.000480292	0.0499	0.0409667	0.00682927	0.00305423
DMNT-2	0.0087				0.0186				0.0357
DMNT-3	0.009				0.0162				0.0375
DMNT-4	0.0091				0.0168				0.0468
DMNT-5	0.0092				0.0152				0.0306
DMNT-6	0.0085				0.0169				0.0453
