# Supplementary material for: Volatile DMNT directly protects plants against Plutella xylostella by disrupting the peritrophic matrix barrier in insect midgut
Source: eLife. 2021 Feb 18;10:e63938. doi: 10.7554/eLife.63938 (PMC7924945; doi:10.7554/eLife.63938)
Supplement: Figure 1—source data 1. [file elife-63938-fig1-data1.xlsx]

## Sheet: Sheet1
Figure 1B PEN1 is overexpressed in transgenic 35pro:PEN1 Arabidopsis plants
	UBC		PEN1
Col-0-1	21.84	21.875	29.64	29.525			UBC	PEN1	△ct	2(-△ct)	average	SD	SE
	21.91		29.41			Col-0-1	21.875	29.525	7.65	0.00497875	0.00371453	0.000897767	0.000634913
Col-0-2	21.99	21.995	30.11	30.29		Col-0-2	21.995	30.29	8.295	0.00318388
	22		30.47			Col-0-3	21.72	30.11	8.39	0.00298098
Col-0-3	21.66	21.72	30.24	30.11		35pro:PEN1-1	22.68	28.355	5.675	0.0195729	0.0193177	0.00117926	0.000833985
	21.78		29.98			35pro:PEN1-2	22.32	28.135	5.815	0.0177628
35pro:PEN1-1	22.71	22.68	27.95	28.355		35pro:PEN1-3	22.57	28.17	5.6	0.0206173
	22.65		28.76
35pro:PEN1-2	22.3	22.32	28.68	28.135
	22.34		27.59
35pro:PEN1-3	22.52	22.57	27.89	28.17
	22.62		28.45
Figure 1C 35Spro:PEN1 transgenic Arabidopsis plants causes lower survival of P. xylostella than wild type control.
Survival (%)	24h					48h					75h					100h					120h					140h
	number	percentage	average	SD	SE	number	percentage	average	SD	SE	number	percentage	average	SD	SE	number	percentage	average	SD	SE	number	percentage	average	SD	SE	number	percentage	average	SD	SE
Control	15	1	1	0	0	15	1	0.988889	0.0248452	0.0111114	13	0.866667	0.933333	0.0544331	0.024344	13	0.866667	0.888889	0.0496904	0.0222229	12	0.8	0.877778	0.0598352	0.0267599	12	0.8	0.877778	0.0598352	0.0267599
	15	1				14	0.933333				14	0.933333				12	0.8				12	0.8				12	0.8
	15	1				15	1				15	1				14	0.933333				14	0.933333				14	0.933333
	15	1				15	1				13	0.866667				13	0.866667				13	0.866667				13	0.866667
	15	1				15	1				15	1				14	0.933333				14	0.933333				14	0.933333
	15	1				15	1				14	0.933333				14	0.933333				14	0.933333				14	0.933333
DMNT	15	1	0.988889	0.0248452	0.0111114	14	0.933333	0.933333	0.0544331	0.024344	13	0.866667	0.811111	0.0458123	0.0204885	13	0.866667	0.777778	0.0737028	0.0329619	9	0.6	0.733333	0.0860663	0.0384912	9	0.6	0.622222	0.0916246	0.040977
	14	0.933333				13	0.866667				12	0.8				12	0.8				12	0.8				12	0.8
	15	1				13	0.866667				12	0.8				10	0.666667				10	0.666667				8	0.533333
	15	1				15	1				12	0.8				11	0.733333				11	0.733333				9	0.6
	15	1				15	1				13	0.866667				13	0.866667				13	0.866667				10	0.666667
	15	1				14	0.933333				11	0.733333				11	0.733333				11	0.733333				8	0.533333
Figure 1E P. xylostella larvae can sense and are repelled by DMNT.
Preference of PX (%)	0 min					10 min					20 min					30 min					40 min					50 min
	number	percentage	average	SD	SE	number	percentage	average	SD	SE	number	percentage	average	SD	SE	number	percentage	average	SD	SE	number	percentage	average	SD	SE	number	percentage	average	SD	SE
Control	0	0	0	0	0	5	0.333333	0.488889	0.11967	0.0535198	6	0.4	0.611111	0.140984	0.063052	6	0.4	0.622222	0.131468	0.0587963	6	0.4	0.622222	0.131468	0.0587963	6	0.4	0.633333	0.126198	0.0564392
	0	0				8	0.533333				11	0.733333				11	0.733333				11	0.733333				11	0.733333
	0	0				6	0.4				9	0.6				9	0.6				9	0.6				9	0.6
	0	0				10	0.666667				12	0.8				12	0.8				12	0.8				12	0.8
	0	0				9	0.6				10	0.666667				10	0.666667				10	0.666667				10	0.666667
	0	0				6	0.4				7	0.466667				8	0.533333				8	0.533333				9	0.6
	60 min					70 min					80 min					90 min					100 min					110 min					120 min
	number	percentage	average	SD	SE	number	percentage	average	SD	SE	number	percentage	average	SD	SE	number	percentage	average	SD	SE	number	percentage	average	SD	SE	number	percentage	average	SD	SE	number	percentage	average	SD	SE
Control	6	0.4	0.622222	0.131468	0.0587963	6	0.4	0.644444	0.125708	0.05622	7	0.466667	0.666667	0.108866	0.0486879	7	0.466667	0.666667	0.108866	0.0486879	7	0.466667	0.666667	0.108866	0.0486879	7	0.466667	0.666667	0.108866	0.0486879	7	0.466667	0.666667	0.108866	0.0486879
	11	0.733333				11	0.733333				11	0.733333				11	0.733333				11	0.733333				11	0.733333				11	0.733333
	9	0.6				10	0.666667				11	0.733333				11	0.733333				11	0.733333				11	0.733333				11	0.733333
	12	0.8				12	0.8				12	0.8				12	0.8				12	0.8				12	0.8				12	0.8
	10	0.666667				10	0.666667				10	0.666667				10	0.666667				10	0.666667				10	0.666667				10	0.666667
	8	0.533333				9	0.6				9	0.6				9	0.6				9	0.6				9	0.6				9	0.6
	0 min					10 min					20 min					30 min					40 min					50 min
	number	percentage	average	SD	SE	number	percentage	average	SD	SE	number	percentage	average	SD	SE	number	percentage	average	SD	SE	number	percentage	average	SD	SE	number	percentage	average	SD	SE
DMNT	0	0	0	0	0	1	0.0666667	0.155556	0.0628539	0.02811	2	0.133333	0.2	0.0544331	0.024344	3	0.2	0.244444	0.0628539	0.02811	3	0.2	0.233333	0.0509175	0.0227717	3	0.2	0.233333	0.0509175	0.0227717
	0	0				3	0.2				4	0.266667				4	0.266667				4	0.266667				4	0.266667
	0	0				2	0.133333				3	0.2				5	0.333333				4	0.266667				4	0.266667
	0	0				2	0.133333				2	0.133333				2	0.133333				2	0.133333				2	0.133333
	0	0				4	0.266667				4	0.266667				4	0.266667				4	0.266667				4	0.266667
	0	0				2	0.133333				3	0.2				4	0.266667				4	0.266667				4	0.266667
	60 min					70 min					80 min					90 min					100 min					110 min					120 min
	number	percentage	average	SD	SE	number	percentage	average	SD	SE	number	percentage	average	SD	SE	number	percentage	average	SD	SE	number	percentage	average	SD	SE	number	percentage	average	SD	SE	number	percentage	average	SD	SE
DMNT	2	0.133333	0.222222	0.0628539	0.02811	2	0.133333	0.233333	0.0745356	0.0333343	2	0.133333	0.222222	0.0628539	0.02811	2	0.133333	0.222222	0.0628539	0.02811	2	0.133333	0.222222	0.0628539	0.02811	2	0.133333	0.222222	0.0628539	0.02811	2	0.133333	0.222222	0.0628539	0.02811
	4	0.266667				4	0.266667				4	0.266667				4	0.266667				4	0.266667				4	0.266667				4	0.266667
	4	0.266667				5	0.333333				4	0.266667				4	0.266667				4	0.266667				4	0.266667				4	0.266667
	2	0.133333				2	0.133333				2	0.133333				2	0.133333				2	0.133333				2	0.133333				2	0.133333
	4	0.266667				4	0.266667				4	0.266667				4	0.266667				4	0.266667				4	0.266667				4	0.266667
	4	0.266667				4	0.266667				4	0.266667				4	0.266667				4	0.266667				4	0.266667				4	0.266667
Figure 1F DMNT treatment significantly lowers the survival of P. xylostella larvae.
Survival (%)	24h					48h					72h					96h					120h
	number	percentage	average	SD	SE	number	percentage	average	SD	SE	number	percentage	average	SD	SE	number	percentage	average	SD	SE	number	percentage	average	SD	SE
Control	15	1	0.966667	0.0333333	0.0149076	15	1	0.966667	0.0333333	0.0149076	15	1	0.966667	0.0333333	0.0149076	12	0.8	0.911111	0.0831479	0.037186	12	0.8	0.911111	0.0831479	0.037186
	15	1				15	1				15	1				15	1				15	1
	15	1				15	1				15	1				15	1				15	1
	14	0.933333				14	0.933333				14	0.933333				12	0.8				12	0.8
	14	0.933333				14	0.933333				14	0.933333				14	0.933333				14	0.933333
	14	0.933333				14	0.933333				14	0.933333				14	0.933333				14	0.933333
DMNT	14	0.933333	0.822222	0.113312	0.050676	12	0.8	0.722222	0.146144	0.0653595	8	0.533333	0.644444	0.113312	0.050676	8	0.533333	0.611111	0.0808901	0.0361763	6	0.4	0.533333	0.121716	0.0544348
	12	0.8				11	0.733333				11	0.733333				10	0.666667				9	0.6
	10	0.666667				8	0.533333				8	0.533333				8	0.533333				7	0.466667
	12	0.8				12	0.8				12	0.8				11	0.733333				11	0.733333
	11	0.733333				8	0.533333				8	0.533333				8	0.533333				6	0.4
	15	1				14	0.933333				11	0.733333				10	0.666667				9	0.6
Figure 1G Phenotypic comparison between DMNT-fed larvae and control larvae .										Figure 1H Growth inhibition of P. xylostella larvae by DMNT
											0h				24h				48h				72h
											Growth (g)	average	SD	SE	Growth (g)	average	SD	SE	Growth (g)	average	SD	SE	Growth (g)	average	SD	SE
										Control	0.0052	0.00503333	0.000149071	6.66687e-05	0.0128	0.0123833	0.00135452	0.000605778	0.0473	0.0483667	0.0049698	0.00222263	0.1332	0.139833	0.00937953	0.00419478
											0.0051				0.0112				0.0467				0.1486
											0.0052				0.0144				0.0545				0.1502
											0.0049				0.0105				0.0413				0.1288
											0.005				0.0136				0.0552				0.1485
											0.0048				0.0118				0.0452				0.1297
										DMNT	0.0049	0.00493333	0.000137437	6.14655e-05	0.0098	0.0071	0.00151217	0.000676285	0.0217	0.02245	0.0050295	0.00224933	0.0313	0.0435167	0.0158435	0.00708567
											0.0048				0.0079				0.0284				0.0716
											0.0048				0.0051				0.0162				0.0382
											0.0052				0.0074				0.0286				0.058
											0.0049				0.0064				0.0163				0.0281
											0.005				0.006				0.0235				0.0339
Figure 1I Reduced pupation of P. xylostella larvae by DMNT treatment.
	Pupation(%)
	number	percentage	average	SD	SE
Control	12	0.8	0.911111	0.0831479	0.037186
	15	1
	15	1
	12	0.8
	14	0.933333
	14	0.933333
DMNT	5	0.333333	0.433333	0.126198	0.0564392
	9	0.6
	6	0.4
	9	0.6
	4	0.266667
	6	0.4
