# Supplementary material for: Volatile DMNT directly protects plants against Plutella xylostella by disrupting the peritrophic matrix barrier in insect midgut
Source: eLife. 2021 Feb 18;10:e63938. doi: 10.7554/eLife.63938 (PMC7924945; doi:10.7554/eLife.63938)
Supplement: Figure 2—source data 1. [file elife-63938-fig2-data1.xlsx]

## Sheet: Sheet1
Figure 2A Larvae die earlier from treatment with DMNT than from starvation
Mortality (%)	12h					24h					36h
	number	percentage	average	SD	SE	number	percentage	average	SD	SE	number	percentage	average	SD	SE
Control	0	0	0	0	0	0	0	0	0	0	0	0	0.0111111	0.0248452	0.0111114
	0	0				0	0				0	0
	0	0				0	0				0	0
	0	0				0	0				1	0.0666667
	0	0				0	0				0	0
	0	0				0	0				0	0
DMNT	0	0	0.0111111	0.0248452	0.0111114	1	0.0666667	0.0555556	0.0458123	0.0204885	2	0.133333	0.133333	0.03849	0.0172138
	0	0				1	0.0666667				1	0.0666667
	0	0				0	0				2	0.133333
	0	0				0	0				2	0.133333
	1	0.0666667				2	0.133333				3	0.2
	0	0				1	0.0666667				2	0.133333
Starvation	0	0	0	0	0	0	0	0	0	0	9	0.6	0.611111	0.0711458	0.0318183
	0	0				0	0				8	0.533333
	0	0				0	0				10	0.666667
	0	0				0	0				9	0.6
	0	0				0	0				11	0.733333
	0	0				0	0				8	0.533333
Figure 2B Decreased lipase activity in the midgut of P. xylostella larvae upon DMNT treatment
	Lipase activity (U/mg)	average	SD	SE
Control	22.3325	19.2948	2.03686	0.910941
	18.6709
	21.7641
	16.7721
	18.2327
	17.9962
DMNT	13.8176	15.4132	2.98478	1.33487
	19.0412
	14.4583
	10.8666
	19.3999
	14.8957
Figure 2E Quantification of "Smurf"
	Survival number	Smurf	percentage	average	SD	SE
Control	14	5	0.357143	0.159524	0.113348	0.0506922
	15	3	0.2
	15	1	0.0666667
	15	2	0.133333
	14	0	0
	15	3	0.2
DMNT	12	6	0.5	0.594353	0.187704	0.0839462
	13	9	0.692308
	10	6	0.6
	7	6	0.857143
	12	3	0.25
	9	6	0.666667
