# Supplementary material for: Volatile DMNT directly protects plants against Plutella xylostella by disrupting the peritrophic matrix barrier in insect midgut
Source: eLife. 2021 Feb 18;10:e63938. doi: 10.7554/eLife.63938 (PMC7924945; doi:10.7554/eLife.63938)
Supplement: Figure 3—source data 1. [file elife-63938-fig3-data1.xlsx]

## Sheet: Sheet1
Figure 3C-D Transverse section and hematoxylin and eosin (HE) after DMNT treatment at 24h
Figure 3E-F Transverse section and hematoxylin and eosin (HE) after DMNT treatment at 48h
Figure 3G-H The PM is damaged by DMNT feeding, as shown by transmission electron microscopy
