# Supplementary material for: Volatile DMNT directly protects plants against Plutella xylostella by disrupting the peritrophic matrix barrier in insect midgut
Source: eLife. 2021 Feb 18;10:e63938. doi: 10.7554/eLife.63938 (PMC7924945; doi:10.7554/eLife.63938)
Supplement: Figure 4—figure supplement 2—source data 1. [file elife-63938-fig4-figsupp2-data1.xlsx]

## Sheet: Sheet1
Figure 4-figure supplement 2 Three homologous gene of mucin were no significant change after RNAi treatment.
	RPL32		RPS13		peritrophin 1		chondroitin		mucin2 like
Control-24h-1	16.05	16.12	17.25	17.245	24.79	24.835	26.79	26.765	26.93	26.845
	16.19		17.24		24.88		26.74		26.76
Control-24h-2	16.32	16.345	17.35	17.345	24.74	24.785	26.84	26.82	26.77	26.8
	16.37		17.34		24.83		26.8		26.83
Control-24h-3	16.76	16.795	17.25	17.25	25.53	25.51	26.97	26.955	27.5	27.485
	16.83		17.25		25.49		26.94		27.47
RNAi-24h-1	16.63	16.61	17.61	17.64	25.07	25.13	27.46	27.305	26.98	26.91
	16.59		17.67		25.19		27.15		26.84
RNAi-24h-2	16.7	16.665	17.71	17.705	25.67	25.645	27.18	27.065	26.95	27.01
	16.63		17.7		25.62		26.95		27.07
RNAi-24h-3	17.25	17.24	18.17	18.195	26.65	26.585	27.99	27.87	27.94	27.945
	17.23		18.22		26.52		27.75		27.95
	RPL32	peritrophin 1	△ct	2(-△ct)	average	normalized to control	average	SD	SE			RPS13	peritrophin 1	△ct	2(-△ct)	average	normalized to control	average	SD	SE
Control-1	16.12	24.835	8.715	0.00237971	0.00254628	0.934581	1	0.0925162	0.0654287		Control-1	17.245	24.835	7.59	0.00519018	0.00473704	1.09566	1	0.225561	0.15952
Control-2	16.345	24.785	8.44	0.00287943		1.13084					Control-2	17.345	24.785	7.44	0.00575886		1.21571
Control-3	16.795	25.51	8.715	0.00237971		0.934581					Control-3	17.25	25.51	8.26	0.00326206		0.68863
DMNT-1	16.61	25.13	8.52	0.00272411	0.00208074	1.06984	0.817166	0.192247	0.13596		DMNT-1	17.64	25.13	7.49	0.0055627	0.00420527	1.1743	0.887743	0.223384	0.15798
DMNT-2	16.665	25.645	8.98	0.00198039		0.777757					DMNT-2	17.705	25.645	7.94	0.00407213		0.859637
DMNT-3	17.24	26.585	9.345	0.00153771		0.603904					DMNT-3	18.195	26.585	8.39	0.00298098		0.629291
	RPL32	chondroitin	△ct	2(-△ct)	average	normalized to control	average	SD	SE			RPS13	chondroitin	△ct	2(-△ct)	average	normalized to control	average	SD	SE
Control-1	16.12	26.765	10.645	0.000624505	0.000733719	0.85115	1	0.142049	0.100459		Control-1	17.245	26.765	9.52	0.00136205	0.0013218	1.03046	1	0.0674864	0.0477273
Control-2	16.345	26.82	10.475	0.000702604		0.957593					Control-2	17.345	26.82	9.475	0.00140521		1.0631
Control-3	16.795	26.955	10.16	0.000874048		1.19126					Control-3	17.25	26.955	9.705	0.00119813		0.90644
DMNT-1	16.61	27.305	10.695	0.000603232	0.00065812	0.822156	0.896964	0.0805029	0.0569328		DMNT-1	17.64	27.305	9.665	0.00123181	0.00132564	0.931923	1.00291	0.104973	0.0742381
DMNT-2	16.665	27.065	10.4	0.000740096		1.00869					DMNT-2	17.705	27.065	9.36	0.00152181		1.15132
DMNT-3	17.24	27.87	10.63	0.000631032		0.860045					DMNT-3	18.195	27.87	9.675	0.00122331		0.925486
	RPL32	mucin2 like	△ct	2(-△ct)	average	normalized to control	average	SD	SE			RPS13	mucin2 like	△ct	2(-△ct)	average	normalized to control	average	SD	SE
Control-1	16.12	26.845	10.725	0.000590817	0.000636185	0.928688	1	0.0852348	0.0602792		Control-1	17.245	26.845	9.6	0.00128858	0.00118106	1.09104	1	0.215527	0.152423
Control-2	16.345	26.8	10.455	0.000712412		1.11982					Control-2	17.345	26.8	9.455	0.00142482		1.2064
Control-3	16.795	27.485	10.69	0.000605326		0.951493					Control-3	17.25	27.485	10.235	0.000829771		0.702565
DMNT-1	16.61	26.91	10.3	0.000793215	0.000720379	1.24683	1.13234	0.135741	0.0959976		DMNT-1	17.64	26.91	9.27	0.00161976	0.00145401	1.37145	1.23111	0.175742	0.124287
DMNT-2	16.665	27.01	10.345	0.000768855		1.20854					DMNT-2	17.705	27.01	9.305	0.00158094		1.33858
DMNT-3	17.24	27.945	10.705	0.000599065		0.941652					DMNT-3	18.195	27.945	9.75	0.00116134		0.9833
