# Supplementary material for: Volatile DMNT directly protects plants against Plutella xylostella by disrupting the peritrophic matrix barrier in insect midgut
Source: eLife. 2021 Feb 18;10:e63938. doi: 10.7554/eLife.63938 (PMC7924945; doi:10.7554/eLife.63938)
Supplement: Figure 4—source data 1. [file elife-63938-fig4-data1.xlsx]

## Sheet: Sheet1
Figure 4B-C DMNT treatment downregulates the expression of PxMucin									RPL32	PxMucin 2	△ct	2(-△ct)	average	normalized to control	average	SD	SE
	RPL32		RPS13		PxMucin 2			Control-1	16.68	23.24	6.56	0.0105985	0.0112777	0.939774	1	0.193838	0.137085
Control-1	16.66	16.68	17.35	17.345	23.22	23.24		Control-2	16.055	22.19	6.135	0.0142292		1.26171
	16.7		17.34		23.26			Control-3	16.345	23.14	6.795	0.00900536		0.798512
Control-2	16.05	16.055	16.94	16.91	22.15	22.19		DMNT-1	16.615	25.35	8.735	0.00234695	0.00478467	0.208105	0.42426	0.15913	0.112539
	16.06		16.88		22.23			DMNT-2	16.165	23.405	7.24	0.0066152		0.586574
Control-3	16.26	16.345	17.2	17.235	23	23.14		DMNT-3	16.585	24.12	7.535	0.00539186		0.4781
	16.43		17.27		23.28
DMNT-1	16.64	16.615	17.28	17.305	25.79	25.35			RPS13	PxMucin 2	△ct	2(-△ct)	average	normalized to control	average	SD	SE
	16.59		17.33		24.91			Control-1	17.345	23.24	5.895	0.0168046	0.0197434	0.851148	1	0.214679	0.151824
DMNT-2	16.11	16.165	16.93	16.915	23.58	23.405		Control-2	16.91	22.19	5.28	0.0257372		1.30358
	16.22		16.9		23.23			Control-3	17.235	23.14	5.905	0.0166885		0.845269
DMNT-3	16.59	16.585	17.01	17.04	24.28	24.12		DMNT-1	17.305	25.35	8.045	0.00378629	0.00743425	0.191774	0.376543	0.151763	0.107329
	16.58		17.07		23.96			DMNT-2	16.915	23.405	6.49	0.0111254		0.563498
								DMNT-3	17.04	24.12	7.08	0.00739108		0.374356
Figure 4D-E Successful RNA interference (RNAi) of PxMucin by dsRNA feeding.
	RPL32		RPS13		PxMucin 2				RPL32	PxMucin 2	△ct	2(-△ct)	average	normalized to control	average	SD	SE
Control-1	16.05	16.12	17.25	17.245	37.09	36.44		Control-1	16.12	36.44	20.32	7.6396e-07	7.01236e-07	1.08945	1	0.284964	0.20153
	16.19		17.24		35.79			Control-2	16.345	37.49	21.145	4.31242e-07		0.614974
Control-2	16.32	16.345	17.35	17.345	37.11	37.49		Control-3	16.795	36.865	20.07	9.08506e-07		1.29558
	16.37		17.34		37.87			RNAi-1	16.61	39.18	22.57	1.60603e-07	1.1951e-07	0.229028	0.170428	0.0768955	0.0543816
Control-3	16.76	16.795	17.25	17.25	36.47	36.865		RNAi-2	16.665	39.29	22.625	1.54595e-07		0.220461
	16.83		17.25		37.26			RNAi-3	17.24	41.7	24.46	4.33318e-08		0.0617934
RNAi-1	16.63	16.61	17.61	17.64	40.65	39.18
	16.59		17.67		37.71				RPS13	PxMucin 2	△ct	2(-△ct)	average	normalized to control	average	SD	SE
RNAi-2	16.7	16.665	17.71	17.705	40.51	39.29		Control-1	17.245	36.44	19.195	1.66621e-06	1.25802e-06	1.32447	1	0.260919	0.184526
	16.63		17.7		38.07			Control-2	17.345	37.49	20.145	8.62483e-07		0.685589
RNAi-3	17.25	17.24	18.17	18.195	41.17	41.7		Control-3	17.25	36.865	19.615	1.24536e-06		0.989941
	17.23		18.22		42.23			RNAi-1	17.64	39.18	21.54	3.27955e-07	2.4328e-07	0.260691	0.193383	0.0895865	0.0633568
								RNAi-2	17.705	39.29	21.585	3.17883e-07		0.252686
								RNAi-3	18.195	41.7	23.505	8.40021e-08		0.0667733
Figure 4G Larvae fed with dsRNA against PxMucin show impaired weight
	0h				24h				48h				72h				96h
	Growth(g)	average	SD	SE	Growth(g)	average	SD	SE	Growth(g)	average	SD	SE	Growth(g)	average	SD	SE	Growth(g)	average	SD	SE
Control-1	0.0009	0.0009	0.00011547	5.16413e-05	0.0018	0.00176667	0.000274874	0.000122931	0.0037	0.00421667	0.000357849	0.00016004	0.0054	0.0085	0.00178979	0.000800441	0.0267	0.0297167	0.00279906	0.00125181
Control-2	0.0008				0.0015				0.0045				0.0071				0.0281
Control-3	0.0011				0.0022				0.0047				0.0088				0.0355
Control-4	0.0008				0.0014				0.0038				0.0089				0.0303
Control-5	0.001				0.002				0.0043				0.0101				0.0288
Control-6	0.0008				0.0017				0.0043				0.0107				0.0289
RNAi-1	0.0008	0.000933333	0.000179505	8.02797e-05	0.0013	0.00131667	0.000240947	0.000107758	0.0034	0.00278333	0.000429793	0.000192215	0.0076	0.00638333	0.000851306	0.000380727	0.0267	0.0223167	0.00371143	0.00165985
RNAi-2	0.0012				0.0018				0.0033				0.0075				0.0281
RNAi-3	0.0007				0.001				0.0025				0.0056				0.0192
RNAi-4	0.001				0.0013				0.0028				0.006				0.0189
RNAi-5	0.0008				0.0012				0.0024				0.0061				0.0215
RNAi-6	0.0011				0.0013				0.0023				0.0055				0.0195
Figure 4H Larvae fed with dsRNA against PxMucin show impaired survival
survival(%)	24h					48h					72h					96h
	number	percentage	average	SD	SE	number	percentage	average	SD	SE	number	percentage	average	SD	SE	number	percentage	average	SD	SE
Control-1	13	0.866667	0.966667	0.0509175	0.0227717	12	0.8	0.9	0.0638285	0.0285458	12	0.8	0.9	0.0638285	0.0285458	12	0.8	0.888889	0.0628539	0.02811
Control-2	14	0.933333				13	0.866667				13	0.866667				13	0.866667
Control-3	15	1				15	1				15	1				15	1
Control-4	15	1				14	0.933333				14	0.933333				14	0.933333
Control-5	15	1				14	0.933333				14	0.933333				13	0.866667
Control-6	15	1				13	0.866667				13	0.866667				13	0.866667
RNAi-1	14	0.933333	0.844444	0.106574	0.0476628	13	0.866667	0.766667	0.107152	0.0479211	13	0.866667	0.755556	0.11967	0.0535198	13	0.866667	0.733333	0.127657	0.0570917
RNAi-2	14	0.933333				14	0.933333				14	0.933333				14	0.933333
RNAi-3	11	0.733333				10	0.666667				9	0.6				9	0.6
RNAi-4	14	0.933333				12	0.8				12	0.8				11	0.733333
RNAi-5	10	0.666667				10	0.666667				10	0.666667				10	0.666667
RNAi-6	13	0.866667				10	0.666667				10	0.666667				9	0.6
Figure 4I Larvae fed with dsRNA against PxMucin show impaired pupation									Figure 4J-K PM structure from control larvae, and larvae fed PxMucin dsRNA
Pupation(%)	number	percentage	average	SD	SE
Control-1	8	0.533333	0.7	0.107152	0.0479211
Control-2	10	0.666667
Control-3	12	0.8
Control-4	10	0.666667
Control-5	10	0.666667
Control-6	13	0.866667
RNAi-1	8	0.533333	0.444444	0.131468	0.0587963
RNAi-2	5	0.333333
RNAi-3	8	0.533333
RNAi-4	3	0.2
RNAi-5	8	0.533333
RNAi-6	8	0.533333
