# Supplementary material for: Volatile DMNT directly protects plants against Plutella xylostella by disrupting the peritrophic matrix barrier in insect midgut
Source: eLife. 2021 Feb 18;10:e63938. doi: 10.7554/eLife.63938 (PMC7924945; doi:10.7554/eLife.63938)
Supplement: Figure 5—figure supplement 2—source data 1. [file elife-63938-fig5-figsupp2-data1.xlsx]

## Sheet: Sheet1
Figure 5-figure supplement 2 Treatment with antibiotics does not influence the integrity of PM structures
