# Supplementary material for: Volatile DMNT directly protects plants against Plutella xylostella by disrupting the peritrophic matrix barrier in insect midgut
Source: eLife. 2021 Feb 18;10:e63938. doi: 10.7554/eLife.63938 (PMC7924945; doi:10.7554/eLife.63938)
Supplement: Figure 5—source data 1. [file elife-63938-fig5-data1.xlsx]

## Sheet: Sheet1
Figure 5A Removal of the microbiota by antibiotics alone has no influence on larval survival
Survival (%)	24h					48h					72h					96h					120h
	number	percentage	average	SD	SE	number	percentage	average	SD	SE	number	percentage	average	SD	SE	number	percentage	average	SD	SE	number	percentage	average	SD	SE
Control-1	15	1	1	0	0	15	1	1	0	0	15	1	1	0	0	15	1	1	0	0	14	0.933333	0.9	0.0638285	0.0285458
Control-2	15	1				15	1				15	1				15	1				13	0.866667
Control-3	15	1				15	1				15	1				15	1				13	0.866667
Control-4	15	1				15	1				15	1				15	1				12	0.8
Control-5	15	1				15	1				15	1				15	1				15	1
Control-6	15	1				15	1				15	1				15	1				14	0.933333
DMNT-1	13	0.866667	0.855556	0.0458123	0.0204885	13	0.866667	0.811111	0.0711458	0.0318183	8	0.533333	0.633333	0.1	0.0447227	6	0.4	0.4	0.0860663	0.0384912	5	0.333333	0.288889	0.0831479	0.037186
DMNT-2	14	0.933333				13	0.866667				12	0.8				8	0.533333				6	0.4
DMNT-3	13	0.866667				13	0.866667				11	0.733333				5	0.333333				5	0.333333
DMNT-4	12	0.8				12	0.8				9	0.6				4	0.266667				2	0.133333
DMNT-5	12	0.8				12	0.8				8	0.533333				7	0.466667				4	0.266667
DMNT-6	13	0.866667				10	0.666667				9	0.6				6	0.4				4	0.266667
PBS-1	15	1	1	0	0	15	1	1	0	0	15	1	1	0	0	15	1	1	0	0	15	1	1	0	0
PBS-2	15	1				15	1				15	1				15	1				15	1
PBS-3	15	1				15	1				15	1				15	1				15	1
PBS-4	15	1				15	1				15	1				15	1				15	1
PBS-5	15	1				15	1				15	1				15	1				15	1
PBS-6	15	1				15	1				15	1				15	1				15	1
Antibiotics-1	15	1	1	0	0	15	1	1	0	0	15	1	1	0	0	15	1	1	0	0	15	1	1	0	0
Antibiotics-2	15	1				15	1				15	1				15	1				15	1
Antibiotics-3	15	1				15	1				15	1				15	1				15	1
Antibiotics-4	15	1				15	1				15	1				15	1				15	1
Antibiotics-5	15	1				15	1				15	1				15	1				15	1
Antibiotics-6	15	1				15	1				15	1				15	1				15	1
Figure 5B Removal of the microbiota by antibiotics alone has no influence on larval pupation
Pupation (%)	number	percentage	average	SD	SE			number	percentage	average	SD	SE
Control-1	14	0.933333	0.888889	0.0737028	0.0329619		DMNT-1	2	0.133333	0.188889	0.0711458	0.0318183
Control-2	13	0.866667					DMNT-2	3	0.2
Control-3	12	0.8					DMNT-3	3	0.2
Control-4	12	0.8					DMNT-4	1	0.0666667
Control-5	15	1					DMNT-5	4	0.266667
Control-6	14	0.933333					DMNT-6	4	0.266667
	number	percentage	average	SD	SE			number	percentage	average	SD	SE
PBS-1	15	1	1	0	0		antibiotics-1	15	1	1	0	0
PBS-2	15	1					antibiotics-2	15	1
PBS-3	15	1					antibiotics-3	15	1
PBS-4	15	1					antibiotics-4	15	1
PBS-5	15	1					antibiotics-5	15	1
PBS-6	15	1					antibiotics-6	15	1
Figure 5C Removal of the microbiota by treatment with antibiotics eliminates the adverse DMNT-mediated effects on the survival
Survival (%)	24h					48h					72h					96h					120h
	number	percentage	average	SD	SE	number	percentage	average	SD	SE	number	percentage	average	SD	SE	number	percentage	average	SD	SE	number	percentage	average	SD	SE
Control-1	15	1	1	0	0	15	1	0.988889	0.0248452	0.0111114	15	1	0.977778	0.031427	0.014055	15	1	0.977778	0.031427	0.014055	15	1	0.977778	0.031427	0.014055
Control-2	15	1				15	1				15	1				15	1				15	1
Control-3	15	1				15	1				15	1				15	1				15	1
Control-4	15	1				15	1				15	1				15	1				15	1
Control-5	15	1				14	0.933333				14	0.933333				14	0.933333				14	0.933333
Control-6	15	1				15	1				14	0.933333				14	0.933333				14	0.933333
antibiotic-1	15	1	1	0	0	15	1	0.988889	0.0248452	0.0111114	15	1	0.988889	0.0248452	0.0111114	15	1	0.988889	0.0248452	0.0111114	15	1	0.988889	0.0248452	0.0111114
antibiotic-2	15	1				15	1				15	1				15	1				15	1
antibiotic-3	15	1				15	1				15	1				15	1				15	1
antibiotic-4	15	1				15	1				15	1				15	1				15	1
antibiotic-5	15	1				15	1				15	1				15	1				15	1
antibiotic-6	15	1				14	0.933333				14	0.933333				14	0.933333				14	0.933333
DMNT-1	13	0.866667	0.911111	0.0496904	0.0222229	13	0.866667	0.811111	0.0895806	0.0400629	10	0.666667	0.622222	0.131468	0.0587963	7	0.466667	0.455556	0.130052	0.0581629	7	0.466667	0.366667	0.126198	0.0564392
DMNT-2	13	0.866667				11	0.733333				9	0.6				7	0.466667				4	0.266667
DMNT-3	13	0.866667				10	0.666667				6	0.4				5	0.333333				4	0.266667
DMNT-4	14	0.933333				13	0.866667				11	0.733333				10	0.666667				8	0.533333
DMNT-5	15	1				14	0.933333				12	0.8				8	0.533333				7	0.466667
DMNT-6	14	0.933333				12	0.8				8	0.533333				4	0.266667				3	0.2
antibiotic+DMNT-1	15	1	1	0	0	14	0.933333	0.977778	0.031427	0.014055	14	0.933333	0.966667	0.0333333	0.0149076	14	0.933333	0.955556	0.0496904	0.0222229	14	0.933333	0.944444	0.0458123	0.0204885
antibiotic+DMNT-2	15	1				15	1				15	1				15	1				15	1
antibiotic+DMNT-3	15	1				15	1				15	1				15	1				14	0.933333
antibiotic+DMNT-4	15	1				15	1				15	1				15	1				15	1
antibiotic+DMNT-5	15	1				15	1				14	0.933333				14	0.933333				14	0.933333
antibiotic+DMNT-6	15	1				14	0.933333				14	0.933333				13	0.866667				13	0.866667
Figure 5D Removal of the microbiota by treatment with antibiotics eliminates the adverse DMNT-mediated effects on the pupation
Pupation (%)	number	percentage	average	SD	SE			number	percentage	average	SD	SE
Control-1	14	0.933333	0.866667	0.07698	0.0344276		DMNT-1	7	0.466667	0.311111	0.170692	0.0763382
Control-2	12	0.8					DMNT-2	4	0.266667
Control-3	14	0.933333					DMNT-3	2	0.133333
Control-4	14	0.933333					DMNT-4	8	0.533333
Control-5	13	0.866667					DMNT-5	6	0.4
Control-6	11	0.733333					DMNT-6	1	0.0666667
	number	percentage	average	SD	SE			number	percentage	average	SD	SE
antibiotics-1	15	1	0.988889	0.0248452	0.0111114		DMNT+antibiotic-1	12	0.8	0.855556	0.0598352	0.0267599
antibiotics-2	15	1					DMNT+antibiotic-2	13	0.866667
antibiotics-3	15	1					DMNT+antibiotic-3	14	0.933333
antibiotics-4	15	1					DMNT+antibiotic-4	14	0.933333
antibiotics-5	15	1					DMNT+antibiotic-5	12	0.8
antibiotics-6	14	0.933333					DMNT+antibiotic-6	12	0.8
Figure 5E-H Comparison of PM structure in control larvae , larvae treated with DMNT alone or in combination with antibiotics
Figure 5I-J Enterococcus faecalis (E. f) can invade gut cells when the PM is disrupted by DMNT treatment
