# Supplementary material for: Volatile DMNT directly protects plants against Plutella xylostella by disrupting the peritrophic matrix barrier in insect midgut
Source: eLife. 2021 Feb 18;10:e63938. doi: 10.7554/eLife.63938 (PMC7924945; doi:10.7554/eLife.63938)
Supplement: Figure 6—figure supplement 2—source data 1. [file elife-63938-fig6-figsupp2-data1.xlsx]

## Sheet: Sheet1
Figure 6-figure supplement 2 Enterococcus sp was enriched around 85-fold in DMNT treated larvae than control larvae.
	Relative abundance of Enterococcus sp	average	SD	SE
Control-1	4.53518	1	1.61377	0.718509
Control-2	0.0395756
Control-3	0
Control-4	0.368254
Control-5	2.84697
Control-6	0.075557
Control-7	0.134462
Control-8	0
DMNT-1	1.40766	85.2888	74.859	33.3299
DMNT-2	23.0713
DMNT-3	180.884
DMNT-4	209.557
DMNT-5	112.646
DMNT-6	110.114
DMNT-7	27.1537
DMNT-8	17.4766
