# Supplementary material for: Volatile DMNT directly protects plants against Plutella xylostella by disrupting the peritrophic matrix barrier in insect midgut
Source: eLife. 2021 Feb 18;10:e63938. doi: 10.7554/eLife.63938 (PMC7924945; doi:10.7554/eLife.63938)
Supplement: Figure 6—figure supplement 3—source data 1. [file elife-63938-fig6-figsupp3-data1.xlsx]

## Sheet: Sheet1
Figure 6-figure supplement 3 The midgut microbiota was majority killed by the antibiotic cocktail from second-instar P. xylostella larvae
