# Supplementary material for: Volatile DMNT directly protects plants against Plutella xylostella by disrupting the peritrophic matrix barrier in insect midgut
Source: eLife. 2021 Feb 18;10:e63938. doi: 10.7554/eLife.63938 (PMC7924945; doi:10.7554/eLife.63938)
Supplement: Figure 6—figure supplement 4—source data 1. [file elife-63938-fig6-figsupp4-data1.xlsx]

## Sheet: Sheet1
Figure 6-figure supplement 4. PxLysozyme expression was down-regulated from 48 to 72 hours.
	RPL32		RPS13		Lysozyme
Control-24h-1	16.8	16.835	17.53	17.565	21.34	21.32			RPL32	Lysozyme	△ct	2(-△ct)	average	normalized to control	average	SD	SE
	16.87		17.6		21.3			Control-24h-1	16.835	21.32	4.485	0.0446561	0.0443286	1.00739	1	0.0774734	0.0547902
Control-24h-2	17.01	17.01	17.71	17.75	21.46	21.38		Control-24h-2	17.01	21.38	4.37	0.0483614		1.09098
	17.01		17.79		21.3			Control-24h-3	16.81	21.455	4.645	0.0399683		0.901637
Control-24h-3	16.81	16.81	17.68	17.67	21.43	21.455		DMNT-24h-1	17.04	21.705	4.665	0.039418	0.0365714	0.889224	0.825007	0.108972	0.0770668
	16.81		17.66		21.48			DMNT-24h-2	17.03	21.655	4.625	0.0405262		0.914223
DMNT-24h-1	17.02	17.04	17.53	17.56	21.7	21.705		DMNT-24h-3	17.17	22.24	5.07	0.0297699		0.671574
	17.06		17.59		21.71
DMNT-24h-2	17.2	17.03	17.58	17.535	21.65	21.655			RPS13	Lysozyme	△ct	2(-△ct)	average	normalized to control	average	SD	SE
	16.86		17.49		21.66			Control-24h-1	17.565	21.32	3.755	0.0740683	0.0757948	0.977222	1	0.0471544	0.0333482
DMNT-24h-3	17.16	17.17	17.82	17.79	22.24	22.24		Control-24h-2	17.75	21.38	3.63	0.0807721		1.06567
	17.18		17.76		22.24			Control-24h-3	17.67	21.455	3.785	0.072544		0.957111
Control-48h-1	16.66	16.68	17.35	17.345	20.18	20.205		DMNT-24h-1	17.56	21.705	4.145	0.0565237	0.0532627	0.745747	0.702723	0.0702646	0.0496921
	16.7		17.34		20.23			DMNT-24h-2	17.535	21.655	4.12	0.0575117		0.758782
Control-48h-2	16.05	16.055	16.94	16.91	19.98	19.935		DMNT-24h-3	17.79	22.24	4.45	0.0457527		0.603639
	16.06		16.88		19.89
Control-48h-3	16.26	16.345	17.2	17.235	20.62	20.625
	16.43		17.27		20.63				RPL32	Lysozyme	△ct	2(-△ct)	average	normalized to control	average	SD	SE
DMNT-48h-1	16.64	16.615	17.28	17.305	23.05	22.975		Control-48h-1	16.68	20.205	3.525	0.0868699	0.0687551	1.26347	1	0.210343	0.148758
	16.59		17.33		22.9			Control-48h-2	16.055	19.935	3.88	0.0679209		0.987868
DMNT-48h-2	16.11	16.165	16.93	16.915	22.09	22.04		Control-48h-3	16.345	20.625	4.28	0.0514744		0.748664
	16.22		16.9		21.99			DMNT-48h-1	16.615	22.975	6.36	0.0121744	0.0163076	0.17707	0.237183	0.0453665	0.0320838
DMNT-48h-3	16.59	16.585	17.01	17.04	22.26	22.25		DMNT-48h-2	16.165	22.04	5.875	0.0170392		0.247824
	16.58		17.07		22.24			DMNT-48h-3	16.585	22.25	5.665	0.019709		0.286655
Control-72h-1	17.86	17.84	18.82	18.81	20.13	20.115
	17.82		18.8		20.1				RPS13	Lysozyme	△ct	2(-△ct)	average	normalized to control	average	SD	SE
Control-72h-2	17.29	17.365	18.13	18.17	19.33	19.34		Control-48h-1	17.345	20.205	2.86	0.137738	0.118661	1.16077	1	0.147819	0.10454
	17.44		18.21		19.35			Control-48h-2	16.91	19.935	3.025	0.122853		1.03533
Control-72h-3	17.53	17.505	18.34	18.445	20.2	20.16		Control-48h-3	17.235	20.625	3.39	0.0953912		0.803899
	17.48		18.55		20.12			DMNT-48h-1	17.305	22.975	5.67	0.0196408	0.0251047	0.165521	0.211567	0.0330444	0.0233694
DMNT-72h-1	16.76	16.685	17.49	17.515	21.87	21.895		DMNT-48h-2	16.915	22.04	5.125	0.0286564		0.241499
	16.61		17.54		21.92			DMNT-48h-3	17.04	22.25	5.21	0.0270168		0.227681
DMNT-72h-2	16.96	17.005	17.78	17.75	22.61	22.615
	17.05		17.72		22.62
DMNT-72h-3	16.73	16.705	17.8	17.76	21.44	21.4			RPL32	Lysozyme	△ct	2(-△ct)	average	normalized to control	average	SD	SE
	16.68		17.72		21.36			Control-72h-1	17.84	20.115	2.275	0.206613	0.206584	1.00014	1	0.188926	0.133611
								Control-72h-2	17.365	19.34	1.975	0.25437		1.23132
								Control-72h-3	17.505	20.16	2.655	0.158769		0.768545
								DMNT-72h-1	16.685	21.895	5.21	0.0270168	0.0286995	0.130779	0.138924	0.0362921	0.0256662
								DMNT-72h-2	17.005	22.615	5.61	0.0204749		0.0991118
								DMNT-72h-3	16.705	21.4	4.695	0.0386068		0.186882
									RPS13	Lysozyme	△ct	2(-△ct)	average	normalized to control	average	SD	SE
								Control-72h-1	18.81	20.115	1.305	0.404721	0.384582	1.05237	1	0.152972	0.108184
								Control-72h-2	18.17	19.34	1.17	0.444421		1.1556
								Control-72h-3	18.445	20.16	1.715	0.304603		0.792036
								DMNT-72h-1	17.515	21.895	4.38	0.0480273	0.0541856	0.124882	0.140895	0.0500216	0.035376
								DMNT-72h-2	17.75	22.615	4.865	0.0343154		0.0892279
								DMNT-72h-3	17.76	21.4	3.64	0.0802141		0.208575
