# Supplementary material for: Volatile DMNT directly protects plants against Plutella xylostella by disrupting the peritrophic matrix barrier in insect midgut
Source: eLife. 2021 Feb 18;10:e63938. doi: 10.7554/eLife.63938 (PMC7924945; doi:10.7554/eLife.63938)
Supplement: Figure 6—source data 1. [file elife-63938-fig6-data1.xlsx]

## Sheet: Sheet1
Figure 6C Feeding with gut microbes decreases the survival
Survival (%)	0h					24h					48h					72h					96h					120h
	number	percentage	average	SD	SE	number	percentage	average	SD	SE	number	percentage	average	SD	SE	number	percentage	average	SD	SE	number	percentage	average	SD	SE	number	percentage	average	SD	SE
antibiotics-1	15	1	1	0	0.447227	15	1	0.966667	0.0333333	0.43232	15	1	0.955556	0.0496904	0.42735	15	1	0.955556	0.0496904	0.42735	15	1	0.955556	0.0496904	0.42735	15	1	0.944444	0.0458123	0.422381
antibiotics-2	15	1				15	1				15	1				15	1				15	1				14	0.933333
antibiotics-3	15	1				15	1				15	1				15	1				15	1				15	1
antibiotics-4	15	1				14	0.933333				14	0.933333				14	0.933333				14	0.933333				14	0.933333
antibiotics-5	15	1				14	0.933333				13	0.866667				13	0.866667				13	0.866667				13	0.866667
antibiotics-6	15	1				14	0.933333				14	0.933333				14	0.933333				14	0.933333				14	0.933333
gut microbes-1	15	1	1	0	0.447227	15	1	0.988889	0.0248452	0.442258	15	1	0.977778	0.031427	0.437289	12	0.8	0.9	0.0638285	0.402504	6	0.4	0.755556	0.174978	0.337905	3	0.2	0.577778	0.187248	0.258398
gut microbes-2	15	1				14	0.933333				14	0.933333				14	0.933333				14	0.933333				10	0.666667
gut microbes-3	15	1				15	1				15	1				13	0.866667				13	0.866667				12	0.8
gut microbes-4	15	1				15	1				15	1				15	1				13	0.866667				10	0.666667
gut microbes-5	15	1				15	1				15	1				13	0.866667				11	0.733333				8	0.533333
gut microbes-6	15	1				15	1				14	0.933333				14	0.933333				11	0.733333				9	0.6
DMNT+antibiotics-1	15	1	1	0	0.447227	14	0.933333	0.966667	0.0509175	0.43232	14	0.933333	0.955556	0.0496904	0.42735	14	0.933333	0.933333	0.07698	0.417412	13	0.866667	0.911111	0.0737028	0.407474	14	0.933333	0.922222	0.0711458	0.412443
DMNT+antibiotics-2	15	1				15	1				14	0.933333				13	0.866667				13	0.866667				13	0.866667
DMNT+antibiotics-3	15	1				13	0.866667				13	0.866667				12	0.8				12	0.8				12	0.8
DMNT+antibiotics-4	15	1				15	1				15	1				15	1				15	1				15	1
DMNT+antibiotics-5	15	1				15	1				15	1				15	1				15	1				15	1
DMNT+antibiotics-6	15	1				15	1				15	1				15	1				14	0.933333				14	0.933333
DMNT+gut microbes-1	15	1	1	0	0.447227	10	0.666667	0.8	0.07698	0.357782	7	0.466667	0.455556	0.104822	0.203737	0	0	0.2	0.138778	0.0894454	0	0	0.0444444	0.0496904	0.0198768	0	0	0	0	0
DMNT+gut microbes-2	15	1				12	0.8				5	0.333333				3	0.2				0	0				0	0
DMNT+gut microbes-3	15	1				12	0.8				10	0.666667				6	0.4				2	0.133333				0	0
DMNT+gut microbes-4	15	1				12	0.8				6	0.4				5	0.333333				1	0.0666667				0	0
DMNT+gut microbes-5	15	1				14	0.933333				6	0.4				1	0.0666667				1	0.0666667				0	0
DMNT+gut microbes-6	15	1				12	0.8				7	0.466667				3	0.2				0	0				0	0
Figure 6D Feeding with gut microbes decreases the pupation
Pupation(%)	84h					96h					108h					120h					132h
	number	percentage	average	SD	SE	number	percentage	average	SD	SE	number	percentage	average	SD	SE	number	percentage	average	SD	SE	number	percentage	average	SD	SE
antibiotics-1	8	0.533333	0.411111	0.0895806	0.18386	15	1	0.9	0.0922958	0.402504	15	1	0.933333	0.0666667	0.417412	15	1	0.944444	0.0458123	0.422381	15	1	0.944444	0.0458123	0.422381
antibiotics-2	6	0.4				13	0.866667				14	0.933333				14	0.933333				14	0.933333
antibiotics-3	7	0.466667				15	1				15	1				15	1				15	1
antibiotics-4	7	0.466667				14	0.933333				14	0.933333				14	0.933333				14	0.933333
antibiotics-5	4	0.266667				11	0.733333				12	0.8				13	0.866667				13	0.866667
antibiotics-6	5	0.333333				13	0.866667				14	0.933333				14	0.933333				14	0.933333
gut microbes-1	0	0	0	0	0	0	0	0.0888889	0.0628539	0.0397535	0	0	0.122222	0.0598352	0.0546611	1	0.0666667	0.255556	0.124226	0.114291	2	0.133333	0.355556	0.152348	0.159014
gut microbes-2	0	0				2	0.133333				2	0.133333				5	0.333333				8	0.533333
gut microbes-3	0	0				2	0.133333				2	0.133333				7	0.466667				8	0.533333
gut microbes-4	0	0				2	0.133333				2	0.133333				4	0.266667				5	0.333333
gut microbes-5	0	0				2	0.133333				2	0.133333				3	0.2				6	0.4
gut microbes-6	0	0				0	0				3	0.2				3	0.2				3	0.2
DMNT+antibiotics-1	2	0.133333	0.155556	0.0916246	0.0695687	11	0.733333	0.766667	0.1	0.342874	11	0.733333	0.766667	0.1	0.342874	13	0.866667	0.888889	0.0737028	0.397535	13	0.866667	0.9	0.0638285	0.402504
DMNT+antibiotics-2	3	0.2				10	0.666667				10	0.666667				12	0.8				13	0.866667
DMNT+antibiotics-3	2	0.133333				11	0.733333				11	0.733333				12	0.8				12	0.8
DMNT+antibiotics-4	1	0.0666667				10	0.666667				10	0.666667				15	1				15	1
DMNT+antibiotics-5	1	0.0666667				13	0.866667				13	0.866667				14	0.933333				14	0.933333
DMNT+antibiotics-6	5	0.333333				14	0.933333				14	0.933333				14	0.933333				14	0.933333
DMNT+gut microbes-1	0	0	0	0	0	0	0	0	0	0	0	0	0	0	0	0	0	0	0	0	0	0	0	0	0
DMNT+gut microbes-2	0	0				0	0				0	0				0	0				0	0
DMNT+gut microbes-3	0	0				0	0				0	0				0	0				0	0
DMNT+gut microbes-4	0	0				0	0				0	0				0	0				0	0
DMNT+gut microbes-5	0	0				0	0				0	0				0	0				0	0
DMNT+gut microbes-6	0	0				0	0				0	0				0	0				0	0
