# Supplementary material for: Volatile DMNT directly protects plants against Plutella xylostella by disrupting the peritrophic matrix barrier in insect midgut
Source: eLife. 2021 Feb 18;10:e63938. doi: 10.7554/eLife.63938 (PMC7924945; doi:10.7554/eLife.63938)
Supplement: Supplementary file 1. [file elife-63938-supp1.xlsx]

## Sheet: Sheet1
gene_id	gene_name	transcript_id	GO	KEGG	KO_ENTRY	EC	Description	FPKM.Treated_12h_1	FPKM.Treated_12h_2	FPKM.Treated_12h_3	FPKM.CK_12h_1	FPKM.CK_12h_2	FPKM.CK_12h_3	fc	log2(fc)	pval	qval	regulation	significant
MSTRG.9168	LOC105388017	MSTRG.9168.1	NA	NA	NA	NA		15.6574	25.4915	25.1294	0	0	0	inf	inf	4.10413e-115	6.9327e-111	up	yes
LOC105391754	LOC105391754	XM_011563298.1	NA	NA	NA	NA	uncharacterized LOC105391754%2C transcript variant X2	0	0	0	1.81919	2.41317	2.36526	-inf	-inf	3.34509e-25	2.82526e-21	down	yes
MSTRG.2004	LOC105398202	XM_011570257.1	GO:0000907(sulfonate dioxygenase activity);GO:0003674(molecular_function);GO:0005634(nucleus);GO:0006351(transcription, DNA-templated);GO:0006355(regulation of transcription, DNA-templated);GO:0008150(biological_process);GO:0016209(antioxidant activity);GO:0016491(oxidoreductase activity);GO:0016568(chromatin modification);GO:0018602(2,4-dichlorophenoxyacetate alpha-ketoglutarate dioxygenase acti…	05202(Transcriptional misregulation in cancers)	NA	NA	lysine-specific demethylase 3A-A	8.35234	6.75236	12.2018	0	0	0	inf	inf	1.27811e-24	7.19664e-21	up	yes
MSTRG.28	LOC105382741	MSTRG.28.2;XM_011553048.1	GO:0003674(molecular_function);GO:0005575(cellular_component);GO:0008150(biological_process)	01200(Carbon metabolism);00020(Citrate cycle (TCA cycle));00190(Oxidative phosphorylation)	NA	NA	zinc finger C2HC domain-containing protein 1C-like	5.11336	4.07324	4.72982	0.708856	0.744832	0.604247	6.76232	2.75752	2.68663e-23	1.13456e-19	up	yes
MSTRG.4738	LOC105382555	MSTRG.4738.1	NA	NA	NA	NA		0.690551	7.34093	2.92674	0	0	0	inf	inf	4.87953e-12	1.6485e-08	up	yes
MSTRG.4952	LOC105382851	MSTRG.4952.1	NA	NA	NA	NA		13.6716	11.8595	11.9512	4.03919	4.12635	2.2246	3.60749	1.851	1.90937e-11	5.3755e-08	up	yes
MSTRG.6213	LOC105384420	MSTRG.6213.1	NA	NA	NA	NA		1.87539	8.26545	4.84866	0.566966	0.324909	0.179974	13.9847	3.80578	1.55221e-09	3.7457e-06	up	yes
MSTRG.11618		MSTRG.11618.1	NA	NA	NA	NA		13.8954	0	12.2914	0	0	0	inf	inf	2.63629e-09	5.56652e-06	up	yes
MSTRG.15678	LOC105396784	MSTRG.15678.1	NA	NA	NA	NA		0	0	0	0	9.53069	9.46237	-inf	-inf	1.57713e-08	2.9601e-05	down	yes
MSTRG.4837	LOC105382662	MSTRG.4837.1	NA	NA	NA	NA		0	0	0	5.06136	0	4.54279	-inf	-inf	1.37811e-07	0.00023279	down	yes
MSTRG.9233	LOC105388065	MSTRG.9233.1	NA	NA	NA	NA		2.02004	1.75604	1.19108	0.225332	0	0.219306	11.1713	3.48172	1.78547e-07	0.000274184	up	yes
MSTRG.108	LOC105385432	MSTRG.108.1	NA	NA	NA	NA		0	0	0	0	2.97166	2.65966	-inf	-inf	6.98494e-07	0.000983247	down	yes
MSTRG.13522	LOC105393425	MSTRG.13522.1	NA	NA	NA	NA		1.28435	1.47098	1.15278	6.71326	3.02525	3.27142	0.300394	-1.73507	9.08888e-07	0.00116077	down	yes
LOC105396224	LOC105396224	XM_011568207.1	GO:0004439(phosphatidylinositol-4,5-bisphosphate 5-phosphatase activity);GO:0004725(protein tyrosine phosphatase activity);GO:0005739(mitochondrion);GO:0006470(protein dephosphorylation);GO:0008138(protein tyrosine/serine/threonine phosphatase activity);GO:0016311(dephosphorylation);GO:0022008(neurogenesis)	04110(Cell cycle)	NA	NA	phosphatidylglycerophosphatase and protein-tyrosine phosphatase 1-like	0.253176	0.35373	0.419242	2.03039	1.9089	1.96387	0.17383	-2.52425	9.62041e-07	0.00116077	down	yes
MSTRG.3913	LOC105381546	MSTRG.3913.4;MSTRG.3913.3;XM_011551301.1;XM_011551302.1	GO:0016758(transferase activity, transferring hexosyl groups);GO:0044822(poly(A) RNA binding);GO:0044822(poly(A) RNA binding)	00510(N-Glycan biosynthesis);00510(N-Glycan biosynthesis)	NA	NA	putative bifunctional UDP-N-acetylglucosamine transferase and deubiquitinase ALG13%2C transcript variant X1	0.571769	0.866494	0.893113	0.766096	8.12084	6.53203	0.151202	-2.72545	6.78911e-06	0.00764545	down	yes
MSTRG.14631	LOC105394859	XM_011566779.1	NA	NA	K20696	NA	cecropin-like	2.21474	5.50011	4.09642	6.64214	15.6569	37.1753	0.198594	-2.3321	1.40832e-05	0.0148683	down	yes
MSTRG.4726	LOC105382524	XM_011552420.1	NA	NA	NA	NA	uncharacterized LOC105382524	0.87854	0.395229	0.695911	0.092669	0.078534	0.184181	5.5424	2.47051	1.74762e-05	0.0173652	up	yes
MSTRG.7411	LOC105385837	XM_011556282.1	GO:0005524(ATP binding);GO:0005777(peroxisome);GO:0008152(metabolic process);GO:0009507(chloroplast);GO:0009611(response to wounding);GO:0009695(jasmonic acid biosynthetic process);GO:0009698(phenylpropanoid metabolic process);GO:0016021(integral component of membrane);GO:0016207(4-coumarate-CoA ligase activity);GO:0016874(ligase activity)	00360(Phenylalanine metabolism);00130(Ubiquinone and other terpenoid-quinone biosynthesis)	K01904	EC:6.2.1.12	4-coumarate--CoA ligase 1-like	0.280657	0.959167	0.251473	2.76349	1.25297	3.99304	0.186191	-2.42514	1.85482e-05	0.0174064	down	yes
MSTRG.1911	LOC105398079	XM_011570132.1	NA	NA	NA	NA	shematrin-like protein 2	13.7129	37.3674	17.0868	87.198	44.8545	93.9468	0.301626	-1.72917	2.02538e-05	0.0180067	down	yes
MSTRG.4048	LOC105381763	XM_011551561.1;MSTRG.4048.2;MSTRG.4048.3;MSTRG.4048.5;MSTRG.4048.4	GO:0004372(glycine hydroxymethyltransferase activity);GO:0005739(mitochondrion);GO:0006544(glycine metabolic process);GO:0006564(L-serine biosynthetic process);GO:0030170(pyridoxal phosphate binding);GO:0048149(behavioral response to ethanol)	01200(Carbon metabolism);01230(Biosynthesis of amino acids);00630(Glyoxylate and dicarboxylate metabolism);00260(Glycine, serine and threonine metabolism);00460(Cyanoamino acid metabolism);00670(One carbon pool by folate)	K00600	EC:2.1.2.1	serine hydroxymethyltransferase%2C cytosolic	22.4958	31.0297	41.306	73.2225	81.6866	60.7284	0.439772	-1.18517	2.16503e-05	0.0182858	down	yes
MSTRG.6112	LOC105384256	MSTRG.6112.1	NA	NA	NA	NA		3.38463	1.51452	2.10628	8.06766	7.19363	6.16805	0.326908	-1.61304	3.50919e-05	0.0272207	down	yes
MSTRG.13081	LOC105392910	XM_011564599.1	NA	NA	NA	NA	shematrin-like protein 2	11.6293	46.0108	16.4407	89.7054	62.5257	114.615	0.277617	-1.84883	3.54521e-05	0.0272207	down	yes
MSTRG.7379		MSTRG.7379.1	NA	NA	NA	NA		0.770066	1.01334	1.47411	6.17225	2.1783	2.50193	0.300163	-1.73618	5.82739e-05	0.0427983	down	yes
MSTRG.1521		MSTRG.1521.1	NA	NA	NA	NA		9.36634	14.2079	11.1809	17.0661	30.093	69.44	0.298074	-1.74626	6.6859e-05	0.0470576	down	yes
MSTRG.2924	LOC105380393	MSTRG.2924.1	NA	NA	NA	NA		2.33822	2.7283	4.55286	8.49055	6.69264	7.85875	0.417473	-1.26025	7.39872e-05	0.0499916	down	yes
MSTRG.11535	LOC105391036	XM_011562442.1;MSTRG.11535.1	GO:0000724(double-strand break repair via homologous recombination);GO:0005634(nucleus);GO:0007283(spermatogenesis);GO:0007338(single fertilization);GO:0016579(protein deubiquitination);GO:0035264(multicellular organism growth);GO:0043588(skin development);GO:0048568(embryonic organ development);GO:0048705(skeletal system morphogenesis);GO:0048872(homeostasis of number of cells);GO:0050679(positi…	03460(Fanconi anemia pathway)	K15361	NA	WD repeat-containing protein 48 homolog	1.79109	2.76768	2.54335	1.13442	1.26405	0.891401	2.15879	1.11022	7.73048e-05	0.0502243	up	yes
MSTRG.12997	LOC105392794	MSTRG.12997.1;XM_011564474.1;MSTRG.12997.3	NA	NA	NA	NA	uncharacterized LOC105392794	32.8158	33.1668	34.7628	17.9577	22.1661	14.7072	1.83738	0.87765	9.48818e-05	0.0593609	up	no
MSTRG.1912	LOC105398081	XM_011570133.1	NA	NA	NA	NA	glycine-rich protein 3-like	4.0539	10.7155	3.69919	36.5965	15.4471	12.4469	0.286377	-1.80401	0.000152256	0.0918536	down	yes
MSTRG.13080	LOC105392918	XM_011564604.1	NA	NA	NA	NA	glycine-rich cell wall structural protein 1.8-like	2.89567	6.04079	3.05014	13.575	9.98397	9.06175	0.367454	-1.44437	0.000184579	0.107514	down	yes
MSTRG.14224	LOC105394266	XM_011566147.1	GO:0004334(fumarylacetoacetase activity);GO:0006527(arginine catabolic process);GO:0009072(aromatic amino acid family metabolic process);GO:0070062(extracellular exosome)	00350(Tyrosine metabolism)	K01555	EC:3.7.1.2	fumarylacetoacetase-like	3.76004	3.77302	3.32579	8.06145	6.41397	7.95872	0.484032	-1.04682	0.000261052	0.14699	down	yes
MSTRG.2926		MSTRG.2926.1	NA	NA	NA	NA		4.76007	7.14234	5.22814	34.0809	9.64647	9.46347	0.322058	-1.63461	0.000384863	0.206718	down	yes
MSTRG.9880	LOC105388887	MSTRG.9880.1	NA	NA	NA	NA		7.45	7.41819	8.01057	3.3881	3.861	2.19528	2.42247	1.27648	0.000397672	0.206718	up	yes
MSTRG.2927	LOC105380394	XM_011549945.1	GO:0000166(nucleotide binding);GO:0000932(cytoplasmic mRNA processing body);GO:0003723(RNA binding);GO:0004386(helicase activity);GO:0005524(ATP binding);GO:0005737(cytoplasm);GO:0016787(hydrolase activity);GO:0031047(gene silencing by RNA);GO:0035279(mRNA cleavage involved in gene silencing by miRNA)	03013(RNA transport);03015(mRNA surveillance pathway)	NA	NA	putative helicase mov-10-B.1	6.17372	5.41191	5.04221	26.3912	8.02472	10.061	0.373853	-1.41946	0.000403843	0.206718	down	yes
MSTRG.10249	LOC105389378	XM_011560475.1	GO:0005214(structural constituent of chitin-based cuticle);GO:0008010(structural constituent of chitin-based larval cuticle);GO:0031012(extracellular matrix);GO:0040003(chitin-based cuticle development)	00230(Purine metabolism);00240(Pyrimidine metabolism);03020(RNA polymerase)	K03006	EC:2.7.7.6	larval/pupal rigid cuticle protein 66-like	0.388941	1.19165	1.74998	8.34384	1.09586	9.26804	0.178032	-2.48979	0.000427184	0.212235	down	yes
MSTRG.9	ND4L	ND4L	NA	NA	NA	NA	NADH dehydrogenase subunit 4L	227.958	199.429	151.608	102.24	71.204	126.091	1.93298	0.950825	0.000554661	0.267695	up	no
MSTRG.4375	LOC105382132	XM_011551970.1;XM_011551969.1;MSTRG.4375.3;MSTRG.4375.1	NA	NA	NA	NA	uncharacterized LOC105382132%2C transcript variant X1	1.38369	0.472096	1.91371	6.78657	3.12391	2.60097	0.301283	-1.73081	0.000590549	0.272338	down	yes
MSTRG.14718	LOC105394974	MSTRG.14718.1	NA	NA	NA	NA		9.81225	7.45932	5.91874	3.28926	2.91831	3.70345	2.33985	1.22642	0.000611564	0.272338	up	yes
MSTRG.14856	LOC105395169	XM_011567107.1	GO:0005777(peroxisome);GO:0010025(wax biosynthetic process);GO:0035336(long-chain fatty-acyl-CoA metabolic process);GO:0080019(fatty-acyl-CoA reductase (alcohol-forming) activity)	00073(Cutin, suberine and wax);04146(Peroxisome)	K13356	EC:1.2.1.84	putative fatty acyl-CoA reductase CG5065	1.09961	1.66301	0.442419	2.11795	2.88575	4.32545	0.343551	-1.5414	0.000612647	0.272338	down	yes
MSTRG.14903		MSTRG.14903.1	NA	NA	NA	NA		385.751	740.649	241.962	219.943	226.501	209.084	2.08742	1.06172	0.000707025	0.306233	up	yes
MSTRG.15880	LOC105397307	LOC105397307	NA	NA	NA	NA		2.67362	5.61843	4.39082	8.40313	7.52267	14.189	0.421151	-1.24759	0.000745281	0.314732	down	yes
MSTRG.11481	LOC105390972	XM_011562371.1	GO:0007409(axonogenesis)	04620(Toll-like receptor signaling pathway);05164(Influenza A);05161(Hepatitis B);05160(Hepatitis C);05168(Herpes simplex infection)	NA	NA	chaoptin-like	1.02524	1.26113	0.542834	2.84241	2.71547	1.42069	0.405413	-1.30254	0.000775189	0.319378	down	yes
MSTRG.3755	LOC105381381	MSTRG.3755.1	NA	NA	NA	NA		1.05545	0.791705	0.979655	1.15729	39.1303	0.310148	0.0696297	-3.84415	0.000814829	0.327717	down	yes
MSTRG.13949	LOC105393929	MSTRG.13949.1	NA	NA	NA	NA		0.981815	1.27529	1.14469	8.76855	1.7141	2.24067	0.267367	-1.90311	0.000843809	0.331479	down	yes
MSTRG.11482	LOC105390974	XM_011562373.1	GO:0002224(toll-like receptor signaling pathway);GO:0003725(double-stranded RNA binding);GO:0098542(defense response to other organism)	04360(Axon guidance)	NA	NA	toll-like receptor 3	0.233402	0.58325	0.350855	6.19043	0.552443	0.456563	0.162166	-2.62445	0.000897838	0.340539	down	yes
MSTRG.4611	LOC105382424	XM_011552302.1	NA	NA	NA	NA	uncharacterized LOC105382424	10.2539	8.87236	9.74914	1.47134	6.11592	4.17239	2.45546	1.29599	0.000907191	0.340539	up	yes
MSTRG.3748	LOC105381402	XM_011551115.1	NA	NA	NA	NA	uncharacterized LOC105381402	2.06211	2.10058	0.899703	0.23269	0.628819	0.579442	3.51324	1.8128	0.00105218	0.386378	up	yes
MSTRG.15058	LOC105395531	XM_011567483.1;MSTRG.15058.2	GO:0005737(cytoplasm);GO:0035002(liquid clearance, open tracheal system);GO:0035149(lumen formation, open tracheal system);GO:0045177(apical part of cell);GO:0050062(long-chain-fatty-acyl-CoA reductase activity);GO:0080019(fatty-acyl-CoA reductase (alcohol-forming) activity)	00073(Cutin, suberine and wax);04146(Peroxisome)	K13356	EC:1.2.1.84	uncharacterized LOC105395531	0.450785	1.43126	0.428199	2.26932	1.37101	3.20478	0.337503	-1.56703	0.00108517	0.390015	down	yes
LOC105380335	LOC105380335	XM_011549860.1	GO:0044822(poly(A) RNA binding)	03040(Spliceosome)	K14326	EC:3.6.4.-	NFX1-type zinc finger-containing protein 1-like%2C transcript variant X2	0.506586	0.50328	0.436128	1.30629	0.942521	0.744279	0.48311	-1.04958	0.00112277	0.395123	down	yes
MSTRG.7932	LOC105386472;LOC105386471	XM_011557031.1;MSTRG.7932.1;XM_011557030.1	GO:0005509(calcium ion binding);GO:0042326(negative regulation of phosphorylation);GO:0005509(calcium ion binding)	04740(Olfactory transduction);04740(Olfactory transduction)	K19695	NA	neurocalcin homolog;neuronal calcium sensor 2	3.85281	3.93684	2.59435	1.90026	1.97821	2.16413	1.71847	0.781121	0.00121566	0.414788	up	no
MSTRG.1916	LOC105398089	XR_961186.1	NA	NA	NA	NA	uncharacterized LOC105398089	109.194	137.011	101.51	231.048	185.243	201.256	0.563057	-0.828647	0.00122776	0.414788	down	no
MSTRG.14128	LOC105394142	XM_011565982.1;XM_011565981.1	GO:0004672(protein kinase activity);GO:0004674(protein serine/threonine kinase activity);GO:0005524(ATP binding);GO:0005730(nucleolus);GO:0006468(protein phosphorylation);GO:0007143(female meiotic division);GO:0016572(histone phosphorylation);GO:0018107(peptidyl-threonine phosphorylation);GO:0022008(neurogenesis);GO:0030717(karyosome formation);GO:0035184(histone threonine kinase activity);GO:003…	04068(FoxO signaling pathway);04150(mTOR signaling pathway);04150(mTOR signaling pathway)	NA	NA	nucleosomal histone kinase 1-like%2C transcript variant X2	1.92735	2.41686	1.7122	0.989539	1.32674	0.955707	1.85099	0.888294	0.00126492	0.41896	up	no
MSTRG.12143		MSTRG.12143.1	NA	NA	NA	NA		3.28545	3.39199	4.60008	6.06013	7.69745	8.92221	0.49725	-1.00796	0.0013414	0.431955	down	yes
MSTRG.13005	LOC105392814	XM_011564494.1;XM_011564495.1	NA	NA	NA	NA	uncharacterized LOC105392814%2C transcript variant X1	2.89654	2.60083	1.97647	1.46401	1.18803	1.29832	1.89194	0.919866	0.00139731	0.431955	up	no
MSTRG.10250	LOC105389379	XM_011560476.1	GO:0005214(structural constituent of chitin-based cuticle);GO:0008010(structural constituent of chitin-based larval cuticle);GO:0031012(extracellular matrix);GO:0040003(chitin-based cuticle development)	00230(Purine metabolism);00240(Pyrimidine metabolism);03020(RNA polymerase)	K03006	EC:2.7.7.6	larval/pupal rigid cuticle protein 66-like	0.14136	2.73382	3.58874	11.5622	4.77043	16.3701	0.197657	-2.33893	0.00144726	0.431955	down	yes
MSTRG.1762	LOC105397888	XM_011569900.1	NA	NA	K20696	NA	cecropin-like	4.00036	6.46938	2.13427	4.95803	15.1797	16.4895	0.344116	-1.53903	0.0014516	0.431955	down	yes
MSTRG.14737		MSTRG.14737.1	NA	NA	NA	NA		1.50497	3.50967	2.46052	4.5278	7.42325	7.2137	0.390048	-1.35828	0.00145591	0.431955	down	yes
MSTRG.11321		MSTRG.11321.1	NA	NA	NA	NA		0.895554	0	0	3.59158	1.84791	2.52697	0.112415	-3.15309	0.00145758	0.431955	down	yes
MSTRG.14674	LOC105394920	XM_011566841.1	GO:0005326(neurotransmitter transporter activity);GO:0005328(neurotransmitter:sodium symporter activity);GO:0006836(neurotransmitter transport);GO:0016021(integral component of membrane)	04974(Protein digestion and absorption);04978(Mineral absorption)	NA	NA	sodium-dependent neutral amino acid transporter B(0)AT3	0.189175	0.168464	0.238212	0.562202	0.661924	0.52467	0.340721	-1.55334	0.00183597	0.519342	down	yes
MSTRG.4924	LOC105382747	XR_960544.1	NA	NA	NA	NA	uncharacterized LOC105382747	5.49421	4.80183	3.35848	1.96073	1.32535	2.51702	2.35297	1.23448	0.00186666	0.519342	up	yes
MSTRG.978	LOC105388691	XM_011559647.1	GO:0005634(nucleus);GO:0005737(cytoplasm);GO:0006915(apoptotic process);GO:0042787(protein ubiquitination involved in ubiquitin-dependent protein catabolic process);GO:0043161(proteasome-mediated ubiquitin-dependent protein catabolic process);GO:0061630(ubiquitin protein ligase activity)	04120(Ubiquitin mediated proteolysis);04310(Wnt signaling pathway)	K04506	EC:2.3.2.27	E3 ubiquitin-protein ligase siah-1-like	2.32947	2.95536	2.09326	8.91291	3.29825	4.69468	0.436423	-1.1962	0.00187472	0.519342	down	yes
MSTRG.11355	LOC105390809	XM_011562172.1	GO:0004842(ubiquitin-protein transferase activity);GO:0005634(nucleus);GO:0006511(ubiquitin-dependent protein catabolic process);GO:0016567(protein ubiquitination);GO:0019005(SCF ubiquitin ligase complex)	04068(FoxO signaling pathway)	K10305	NA	F-box only protein 25	3.7186	5.75617	5.71891	10.7383	15.6403	8.30389	0.438079	-1.19074	0.00187543	0.519342	down	yes
MSTRG.4496	LOC105382308	MSTRG.4496.1	NA	NA	NA	NA		9.18204	10.116	7.1211	14.0228	18.8561	15.1803	0.54972	-0.863231	0.00203065	0.553254	down	no
MSTRG.5212	LOC105383122	XM_011553137.1	GO:0004784(superoxide dismutase activity);GO:0005507(copper ion binding);GO:0005737(cytoplasm);GO:0008270(zinc ion binding);GO:0019430(removal of superoxide radicals)	04146(Peroxisome);04213(Longevity regulating pathway - multiple species)	K04565	EC:1.15.1.1	superoxide dismutase [Cu-Zn]-like	4.04572	6.83984	5.18584	10.0529	7.83009	17.7103	0.451528	-1.14711	0.00214175	0.572059	down	yes
MSTRG.5543	LOC105383571	XM_011553643.1	GO:0004252(serine-type endopeptidase activity);GO:0006508(proteolysis)	04080(Neuroactive ligand-receptor interaction)	K01312	EC:3.4.21.4	trypsin%2C alkaline C-like	7.65571	10.5606	13.166	24.4007	12.691	32.6044	0.450273	-1.15113	0.0021674	0.572059	down	yes
MSTRG.7373		MSTRG.7373.1	NA	NA	NA	NA		3.79902	2.93202	2.02327	10.6959	4.2273	5.18137	0.43544	-1.19946	0.00226464	0.588528	down	yes
MSTRG.797	LOC105386376	XM_011556927.1;MSTRG.797.1;XM_011556944.1;XM_011556919.1	GO:0004382(guanosine-diphosphatase activity);GO:0005737(cytoplasm);GO:0017110(nucleoside-diphosphatase activity);GO:0017111(nucleoside-triphosphatase activity);GO:0045134(uridine-diphosphatase activity);GO:0045134(uridine-diphosphatase activity)	00230(Purine metabolism);00240(Pyrimidine metabolism);00240(Pyrimidine metabolism)	K01511	EC:3.6.1.6	nucleoside-diphosphatase uda-1%2C transcript variant X3	0.661837	1.448	1.44587	1.37046	1.9814	9.24485	0.282273	-1.82484	0.00234073	0.599086	down	yes
MSTRG.12177	LOC105391798	XM_011563349.1	GO:0003723(RNA binding);GO:0005737(cytoplasm);GO:0005739(mitochondrion);GO:0005829(cytosol);GO:0010529(negative regulation of transposition);GO:0034584(piRNA binding);GO:0035194(posttranscriptional gene silencing by RNA);GO:0043186(P granule);GO:0060213(positive regulation of nuclear-transcribed mRNA poly(A) tail shortening)	04320(Dorso-ventral axis formation)	K02156	NA	piwi-like protein 1	0.717037	1.02591	0.381249	1.0676	2.2237	1.5205	0.441455	-1.17966	0.00250202	0.630809	down	yes
MSTRG.4539		MSTRG.4539.1;MSTRG.4539.2	NA	NA	NA	NA		5.62574	7.50354	4.31462	1.97904	4.50626	1.46273	2.19475	1.13405	0.00258946	0.643254	up	yes
MSTRG.6661		MSTRG.6661.1	NA	NA	NA	NA		2.63314	4.54639	4.00392	17.3379	5.43395	6.02563	0.388349	-1.36457	0.00271216	0.663073	down	yes
MSTRG.1467	LOC105394192	XM_011566043.1	GO:0003674(molecular_function);GO:0008150(biological_process);GO:0016021(integral component of membrane)	04142(Lysosome)	K06497	NA	23 kDa integral membrane protein-like	0.365684	0.34699	1.48006	2.02432	2.33543	3.10324	0.293815	-1.76702	0.00274775	0.663073	down	yes
MSTRG.14632	LOC105394860	XM_011566780.1	NA	NA	K20696	NA	cecropin-like	6.89703	9.07019	5.50589	26.5333	13.2625	9.22099	0.438077	-1.19074	0.00299535	0.712641	down	yes
LOC105390601	LOC105390601	XM_011561938.1	NA	NA	NA	NA	uncharacterized LOC105390601	2.05487	2.38325	2.92693	1.15914	0.826044	0.76121	2.68172	1.42316	0.00306059	0.716903	up	yes
MSTRG.9647	LOC105388626	MSTRG.9647.2;MSTRG.9647.1;XM_011559566.1;MSTRG.9647.3	GO:0003676(nucleic acid binding);GO:0005575(cellular_component);GO:0008150(biological_process);GO:0008270(zinc ion binding)	03018(RNA degradation)	NA	NA	CCHC-type zinc finger protein CG3800	50.3219	51.5094	363.231	613.07	578.42	431.566	0.286535	-1.80322	0.00316852	0.716903	down	yes
MSTRG.14538	LOC105394739	XM_011566650.1	GO:0000077(DNA damage checkpoint);GO:0005634(nucleus);GO:0042393(histone binding);GO:0045944(positive regulation of transcription from RNA polymerase II promoter)	NA	K20915	NA	tumor suppressor p53-binding protein 1-like	1.07303	1.43898	1.30312	0.490106	0.731193	0.615649	2.07689	1.05442	0.00322251	0.716903	up	yes
MSTRG.4912	LOC105382735	XM_011552669.1	NA	NA	NA	NA	pollen-specific leucine-rich repeat extensin-like protein 1%2C transcript variant X1	5.70474	5.42522	5.06405	3.58725	2.18178	3.31614	1.78247	0.833876	0.003253	0.716903	up	no
LOC105392078	LOC105392078	XM_011563669.1	NA	NA	NA	NA	uncharacterized LOC105392078	3.67926	2.54463	3.39686	1.35898	1.07367	1.45333	2.47576	1.30787	0.00325523	0.716903	up	yes
LOC105384092	LOC105384092	XM_011554264.1	GO:0003785(actin monomer binding);GO:0005524(ATP binding);GO:0005634(nucleus);GO:0005886(plasma membrane);GO:0016307(phosphatidylinositol phosphate kinase activity);GO:0016308(1-phosphatidylinositol-4-phosphate 5-kinase activity);GO:0046854(phosphatidylinositol phosphorylation);GO:0051015(actin filament binding)	NA	NA	NA	radial spoke head 10 homolog B-like	0.617198	0.342955	0.494921	0.204531	0.124654	0.196046	2.77035	1.47007	0.00326791	0.716903	up	yes
MSTRG.1360	LOC105393477	MSTRG.1360.1	NA	NA	NA	NA		2.43229	2.71269	2.2409	8.17235	2.36718	6.50263	0.433388	-1.20627	0.00344478	0.738893	down	yes
MSTRG.4645	LOC105382498	MSTRG.4645.2;XM_011552390.1	GO:0001731(formation of translation preinitiation complex);GO:0002181(cytoplasmic translation);GO:0003743(translation initiation factor activity);GO:0005844(polysome);GO:0016281(eukaryotic translation initiation factor 4F complex);GO:0033592(RNA strand annealing activity);GO:0034057(RNA strand-exchange activity);GO:0043024(ribosomal small subunit binding);GO:0097010(eukaryotic translation initiat…	03013(RNA transport);04150(mTOR signaling pathway)	K03258	NA	eukaryotic translation initiation factor 4B	35.1801	41.0489	111.292	140.509	146.738	127.197	0.452465	-1.14412	0.00345563	0.738893	down	yes
MSTRG.13523	LOC105393425	MSTRG.13523.1	NA	NA	NA	NA		3.38316	4.4541	2.18414	14.1101	4.60306	5.45078	0.414725	-1.26977	0.00351658	0.73905	down	yes
MSTRG.5412	LOC105383398	XM_011553445.1	GO:0000978(RNA polymerase II core promoter proximal region sequence-specific DNA binding);GO:0003676(nucleic acid binding);GO:0003677(DNA binding);GO:0005634(nucleus);GO:0006355(regulation of transcription, DNA-templated);GO:0046872(metal ion binding)	03008(Ribosome biogenesis in eukaryotes)	NA	NA	zinc finger protein 878-like	1.42521	1.13716	1.59655	0.741327	0.726789	0.637226	1.97542	0.982157	0.00354387	0.73905	up	no
MSTRG.11079	LOC105390447	XM_011561751.1;MSTRG.11079.1	GO:0005829(cytosol);GO:0006152(purine nucleoside catabolic process);GO:0008477(purine nucleosidase activity)	NA	K01109	EC:3.1.3.66	inosine-uridine preferring nucleoside hydrolase-like	6.63164	7.51397	6.57989	12.4365	10.1674	14.6551	0.556254	-0.846184	0.00363358	0.740142	down	no
MSTRG.10437	LOC105389598	XM_011560741.1	NA	NA	NA	NA	uncharacterized LOC105389598	1.94708	0.670844	1.34958	3.27233	4.61433	1.78627	0.410166	-1.28572	0.00363674	0.740142	down	yes
MSTRG.122	LOC105393274	XM_011565042.1;MSTRG.122.1	GO:0003723(RNA binding);GO:0004525(ribonuclease III activity);GO:0004530(deoxyribonuclease I activity);GO:0005634(nucleus);GO:0005737(cytoplasm);GO:0006309(apoptotic DNA fragmentation);GO:0016442(RISC complex);GO:0030422(production of siRNA involved in RNA interference);GO:0031054(pre-miRNA processing)	05206(MicroRNAs in cancer)	NA	NA	endoribonuclease Dicer	1.02214	1.26346	0.928343	4.27072	1.68962	1.35824	0.439148	-1.18722	0.00377212	0.758555	down	yes
MSTRG.14161	LOC105394178	XM_011566023.1;MSTRG.14161.2	GO:0030659(cytoplasmic vesicle membrane);GO:0046907(intracellular transport)	NA	NA	NA	amyloid protein-binding protein 2-like	2.19276	2.24347	2.40629	3.04104	14.7674	2.46634	0.337489	-1.56709	0.00384081	0.760313	down	yes
MSTRG.7563	LOC105386036	XM_011556517.1	GO:0005351(sugar:proton symporter activity);GO:0005355(glucose transmembrane transporter activity);GO:0005887(integral component of plasma membrane);GO:0035428(hexose transmembrane transport);GO:0046323(glucose import)	NA	NA	NA	facilitated trehalose transporter Tret1-like	0.470814	0.806065	0.928757	1.97633	1.68411	1.42721	0.433527	-1.20581	0.00389012	0.760313	down	yes
LOC105384556	LOC105384556	XM_011554822.1	GO:0004252(serine-type endopeptidase activity);GO:0006508(proteolysis)	00230(Purine metabolism)	NA	NA	trypsin-1-like	0.353807	0.374311	0	1.12682	0.893827	1.00843	0.240376	-2.05664	0.00391589	0.760313	down	yes
MSTRG.10491	LOC105389704;LOC105389703	XM_011560866.1;XM_011560865.1;MSTRG.10491.2	GO:0004090(carbonyl reductase (NADPH) activity);GO:0005737(cytoplasm);GO:0017144(drug metabolic process);GO:0042373(vitamin K metabolic process);GO:0047021(15-hydroxyprostaglandin dehydrogenase (NADP+) activity);GO:0050221(prostaglandin-E2 9-reductase activity);GO:0055114(oxidation-reduction process);GO:0008253(5'-nucleotidase activity);GO:0009166(nucleotide catabolic process)	00590(Arachidonic acid metabolism);00980(Metabolism of xenobiotics by cytochrome P450);00230(Purine metabolism);00240(Pyrimidine metabolism);00760(Nicotinate and nicotinamide metabolism)	K00079;K01081	EC:1.1.1.184;EC:1.1.1.189;EC:3.1.3.5	carbonyl reductase [NADPH] 1-like;5'-nucleotidase-like	0.571939	0.425147	0.521748	0.832377	0.978793	1.21167	0.502453	-0.992939	0.00408573	0.779899	down	no
MSTRG.2985	LOC105380470	XM_011550037.1	NA	NA	NA	NA	uncharacterized LOC105380470	12.9227	10.6936	8.50027	16.4552	32.7308	15.5742	0.49593	-1.01179	0.00410911	0.779899	down	yes
MSTRG.3945	LOC105381593	MSTRG.3945.1;MSTRG.3945.2;MSTRG.3945.3;XM_011551357.1	NA	00512(Mucin type O-glycan biosynthesis)	NA	NA	tigger transposable element-derived protein 6-like	32.8084	8.23751	10.3014	41.6922	41.449	36.2159	0.430199	-1.21692	0.00433824	0.810928	down	yes
MSTRG.5102		MSTRG.5102.1	NA	NA	NA	NA		7.76904	5.76913	6.53337	3.80393	3.53219	3.19525	1.90588	0.930459	0.0043686	0.810928	up	no
MSTRG.2797		MSTRG.2797.1	NA	NA	NA	NA		7.19336	5.63396	4.26067	0.86924	3.50556	2.56984	2.4606	1.29901	0.00447888	0.822361	up	yes
MSTRG.7112		MSTRG.7112.1	NA	NA	NA	NA		5.15197	2.51679	4.99942	2.10195	1.22935	1.9385	2.40392	1.26539	0.00465905	0.846244	up	yes
MSTRG.15852		MSTRG.15852.1	NA	NA	NA	NA		3.25651	2.55663	5.26246	1.67883	1.15762	1.83101	2.37294	1.24668	0.00484371	0.870424	up	yes
MSTRG.6337	LOC105384571	MSTRG.6337.1	NA	NA	NA	NA		10.9222	4.20216	6.70261	4.00129	2.62768	2.02515	2.52214	1.33465	0.00489868	0.871037	up	yes
MSTRG.4493	LOC105382289	XM_011552142.1	GO:0005739(mitochondrion)	NA	NA	NA	cytochrome b5-related protein-like	1.24434	1.46985	1.37137	3.03365	2.14502	2.76811	0.514115	-0.959837	0.00513094	0.896094	down	no
MSTRG.1523	LOC105394876	XM_011566801.1	GO:0005615(extracellular space);GO:0045087(innate immune response);GO:0050830(defense response to Gram-positive bacterium);GO:0050832(defense response to fungus)	NA	NA	NA	uncharacterized LOC105394876	58.8541	68.7911	71.1807	98.6619	90.316	162.363	0.565907	-0.821364	0.00514569	0.896094	down	no
MSTRG.7148	LOC105385573	XM_011555975.1	GO:0003677(DNA binding);GO:0005634(nucleus);GO:0008150(biological_process)	NA	NA	NA	uncharacterized LOC105385573	1.60792	1.52749	1.76917	1.08256	0.954374	0.81803	1.71791	0.780656	0.0052301	0.897702	up	no
MSTRG.422	LOC105381407	XM_011551121.1	GO:0005615(extracellular space);GO:0042302(structural constituent of cuticle)	NA	NA	NA	larval cuticle protein LCP-17-like	93.9523	330.034	337.72	629.141	295.233	974.13	0.401214	-1.31756	0.00526122	0.897702	down	yes
MSTRG.15778	LOC105397151	MSTRG.15778.1;XM_011569163.1	GO:0004222(metalloendopeptidase activity);GO:0006508(proteolysis);GO:0008270(zinc ion binding);GO:0017090(meprin A complex)	04974(Protein digestion and absorption)	NA	NA	zinc metalloproteinase nas-13-like	14.1538	12.6422	21.8032	5.80425	10.6315	10.2912	1.81836	0.862635	0.00537429	0.907825	up	no
MSTRG.6123	LOC105384293	MSTRG.6123.1	NA	NA	NA	NA		2.10533	2.7479	2.51804	7.55643	2.55468	5.03738	0.486602	-1.03919	0.00553416	0.919544	down	yes
MSTRG.3265	LOC105380810	MSTRG.3265.1	NA	NA	NA	NA		5.23702	3.80426	2.80748	8.99096	4.4299	12.609	0.455199	-1.13543	0.00555254	0.919544	down	yes
MSTRG.13757	LOC105393722	XM_011565520.1	GO:0001649(osteoblast differentiation);GO:0003824(catalytic activity);GO:0004312(fatty acid synthase activity);GO:0004313([acyl-carrier-protein] S-acetyltransferase activity);GO:0004314([acyl-carrier-protein] S-malonyltransferase activity);GO:0004315(3-oxoacyl-[acyl-carrier-protein] synthase activity);GO:0004316(3-oxoacyl-[acyl-carrier-protein] reductase (NADPH) activity);GO:0004317(3-hydroxypalm…	01212(Fatty acid metabolism);00061(Fatty acid biosynthesis)	K00665	EC:2.3.1.85	fatty acid synthase-like	6.58337	14.1317	9.10698	19.7776	13.6262	23.3197	0.525745	-0.927566	0.00585895	0.932713	down	no
MSTRG.15022	LOC105395496	XM_011567449.1	NA	NA	NA	NA	vegetative cell wall protein gp1-like	188.831	160.318	112.973	107.172	96.919	95.0008	1.54508	0.627684	0.00586159	0.932713	up	no
MSTRG.5314	LOC105383281	XM_011553313.1;MSTRG.5314.2	GO:0003743(translation initiation factor activity);GO:0004521(endoribonuclease activity);GO:0005515(protein binding);GO:0005737(cytoplasm);GO:0005829(cytosol);GO:0006413(translational initiation);GO:0007279(pole cell formation);GO:0007349(cellularization);GO:0007367(segment polarity determination);GO:0009047(dosage compensation by hyperactivation of X chromosome);GO:0010526(negative regulation of…	04320(Dorso-ventral axis formation)	NA	NA	protein argonaute-2-like	3.97101	4.97742	3.7791	7.6789	12.9653	4.49362	0.506311	-0.981904	0.00588624	0.932713	down	no
LOC105395928	LOC105395928	XM_011567907.1	GO:0003723(RNA binding);GO:0004525(ribonuclease III activity);GO:0004530(deoxyribonuclease I activity);GO:0005634(nucleus);GO:0005737(cytoplasm);GO:0006309(apoptotic DNA fragmentation);GO:0016442(RISC complex);GO:0030422(production of siRNA involved in RNA interference);GO:0031054(pre-miRNA processing)	05206(MicroRNAs in cancer)	NA	NA	endoribonuclease Dicer-like	0.590249	0.343729	0.401772	1.9677	0.756537	0.702502	0.389802	-1.35919	0.00591167	0.932713	down	yes
MSTRG.2995	LOC105380526	XM_011550103.1	GO:0004806(triglyceride lipase activity);GO:0048812(neuron projection morphogenesis)	00100(Steroid biosynthesis);04142(Lysosome)	K01052	EC:3.1.1.13	lipase 3-like	4.17983	3.62994	5.21752	2.61705	2.1006	2.61431	1.77678	0.829266	0.00595509	0.932713	up	no
MSTRG.13663	LOC105393613	MSTRG.13663.1	NA	NA	NA	NA		8.90291	8.02084	7.06485	3.02054	7.21741	2.16182	1.9346	0.952036	0.00596335	0.932713	up	no
LOC105382208	LOC105382208	XM_011552057.1	GO:0000502(proteasome complex);GO:0004175(endopeptidase activity);GO:0004298(threonine-type endopeptidase activity);GO:0005839(proteasome core complex);GO:0006974(cellular response to DNA damage stimulus);GO:0032504(multicellular organism reproduction);GO:0043161(proteasome-mediated ubiquitin-dependent protein catabolic process)	03050(Proteasome)	K02734	EC:3.4.25.1	proteasome subunit beta type-2-like	3.30819	0.938224	1.89235	0.716319	0.715134	0.867873	2.66981	1.41674	0.00613809	0.949615	up	yes
MSTRG.199	LOC105398014	XM_011570066.1	GO:0009055(electron carrier activity);GO:0015035(protein disulfide oxidoreductase activity);GO:0045454(cell redox homeostasis)	00590(Arachidonic acid metabolism)	K05309	EC:5.3.99.3	prostaglandin E synthase 2	6.3858	5.20284	5.08045	10.3286	9.0838	8.80495	0.590739	-0.759407	0.00618385	0.949615	down	no
MSTRG.4077	LOC105381776	XM_011551573.1	GO:0005355(glucose transmembrane transporter activity);GO:0016021(integral component of membrane);GO:0055085(transmembrane transport)	04512(ECM-receptor interaction)	NA	NA	facilitated trehalose transporter Tret1-like	4.28478	7.62064	3.69937	2.24954	3.99858	1.90311	1.91441	0.936897	0.00633239	0.960306	up	no
MSTRG.9271	LOC105388111	XM_011558962.1	GO:0005576(extracellular region);GO:0005616(larval serum protein complex);GO:0005811(lipid particle);GO:0045735(nutrient reservoir activity)	00350(Tyrosine metabolism);00740(Riboflavin metabolism)	K00505	EC:1.14.18.1	acidic juvenile hormone-suppressible protein 1-like	1.68588	0.99583	2.45988	0.842474	0.888288	0.104708	2.80124	1.48607	0.00636717	0.960306	up	yes
MSTRG.11762	LOC105391305	MSTRG.11762.1	NA	NA	NA	NA		4.60842	2.43682	2.59545	1.67686	1.16542	1.80038	2.07654	1.05418	0.00661399	0.972295	up	yes
MSTRG.1314	LOC105392787	MSTRG.1314.3;XM_011564467.1;MSTRG.1314.1	NA	NA	NA	NA	cyclic GMP-AMP synthase-like	65.0001	61.0624	45.1427	139.918	80.581	77.1803	0.575132	-0.798034	0.00663196	0.972295	down	no
MSTRG.12090	LOC105391687	XM_011563211.1	NA	NA	NA	NA	uncharacterized LOC105391687	4.86151	3.75589	2.91211	1.98794	1.74916	2.77037	1.77173	0.825162	0.00669795	0.972295	up	no
MSTRG.10604	LOC105389846	XM_011561042.1	GO:0005739(mitochondrion);GO:0008152(metabolic process);GO:0016740(transferase activity);GO:0016746(transferase activity, transferring acyl groups);GO:0031625(ubiquitin protein ligase binding);GO:0042645(mitochondrial nucleoid);GO:0043754(dihydrolipoyllysine-residue (2-methylpropanoyl)transferase activity)	00640(Propanoate metabolism);00280(Valine, leucine and isoleucine degradation)	K09699	EC:2.3.1.168	lipoamide acyltransferase component of branched-chain alpha-keto acid dehydrogenase complex%2C mitochondrial	3.49392	4.6747	4.52329	7.01471	8.6864	6.42082	0.573725	-0.801569	0.0066982	0.972295	down	no
MSTRG.13555	LOC105393455	MSTRG.13555.1;XM_011565220.1	GO:0004100(chitin synthase activity)	00520(Amino sugar and nucleotide sugar metabolism)	K00698	EC:2.4.1.16	uncharacterized LOC105393455	8.20457	9.12553	11.7879	12.8678	16.4694	20.3202	0.586377	-0.770101	0.00673446	0.972295	down	no
MSTRG.6741	LOC105385052	MSTRG.6741.1	NA	NA	NA	NA		0.368181	1.80093	0.993778	6.89086	1.62804	2.5557	0.285599	-1.80794	0.00687299	0.973666	down	yes
MSTRG.6490		MSTRG.6490.1	NA	NA	NA	NA		0.625557	3.51839	4.46638	0.967853	0.111717	0.93756	4.2686	2.09376	0.0069282	0.973666	up	yes
MSTRG.11648	LOC105391166	MSTRG.11648.1	NA	NA	NA	NA		13.2477	10.6362	14.6812	6.59864	10.5004	6.27084	1.65021	0.72265	0.00697096	0.973666	up	no
LOC105390946	LOC105390946	XM_011562330.1	GO:0003723(RNA binding);GO:0003964(RNA-directed DNA polymerase activity);GO:0005737(cytoplasm);GO:0006278(RNA-dependent DNA biosynthetic process);GO:0015074(DNA integration)	03015(mRNA surveillance pathway)	NA	NA	uncharacterized protein K02A2.6-like	0.370974	0.618777	0.436053	0.576786	2.60745	0.667586	0.370164	-1.43376	0.00699691	0.973666	down	yes
MSTRG.16042	LOC105397607	XM_011569628.1	NA	NA	NA	NA	myosin-9-like	6.72879	4.49609	4.03991	3.27445	2.72814	3.21953	1.65524	0.727037	0.00703216	0.973666	up	no
MSTRG.15552	LOC105396439	XM_011568437.1	GO:0004044(amidophosphoribosyltransferase activity);GO:0006189('de novo' IMP biosynthetic process);GO:0009113(purine nucleobase biosynthetic process);GO:0009116(nucleoside metabolic process)	00230(Purine metabolism);00250(Alanine, aspartate and glutamate metabolism)	K00764	EC:2.4.2.14	amidophosphoribosyltransferase-like	2.32567	4.21284	4.96963	9.53566	7.62885	5.90481	0.498851	-1.00332	0.0071051	0.975766	down	yes
MSTRG.9350	LOC105388237	XM_011559115.1	NA	NA	NA	NA	desmoplakin-like	2.87713	2.30231	1.78647	1.61346	0.968731	1.37686	1.75949	0.815156	0.00754073	1	up	no
LOC105394696	LOC105394696	XM_011566603.1	NA	NA	NA	NA	uncharacterized LOC105394696	0.826437	0.781947	0.88742	2.40038	2.16673	1.26943	0.427617	-1.22561	0.00780357	1	down	yes
MSTRG.5546	LOC105383595	XM_011553671.1	GO:0004252(serine-type endopeptidase activity);GO:0005575(cellular_component);GO:0006508(proteolysis);GO:0008233(peptidase activity);GO:0008236(serine-type peptidase activity);GO:0016787(hydrolase activity)	04080(Neuroactive ligand-receptor interaction)	K01312	EC:3.4.21.4	trypsin%2C alkaline A-like	40.3063	33.862	39.7551	31.0181	23.5949	16.0892	1.61131	0.688237	0.0079365	1	up	no
MSTRG.10713	LOC105390015	XM_011561242.1	GO:0005576(extracellular region);GO:0042742(defense response to bacterium);GO:0045088(regulation of innate immune response)	NA	K20692	NA	beta-1%2C3-glucan-binding protein-like	1.16867	1.61456	0.900431	2.05834	3.29087	3.12426	0.434729	-1.20181	0.00794619	1	down	yes
MSTRG.7036	LOC105385418	XM_011555795.1	NA	NA	NA	NA	uncharacterized LOC105385418	5.91814	4.76625	2.93628	2.54424	2.92775	1.59553	1.92722	0.946521	0.00794979	1	up	no
MSTRG.10336	LOC105389480	MSTRG.10336.1	NA	NA	NA	NA		61.0729	48.3133	58.8117	32.807	38.9469	36.2184	1.55779	0.639499	0.00801973	1	up	no
MSTRG.1947	LOC105398115	XM_011570169.1	NA	NA	K10840	NA	myosin light chain 6B-like	8.82921	5.47885	4.19037	2.71404	2.99498	4.25428	1.85666	0.892708	0.00813696	1	up	no
MSTRG.8833		MSTRG.8833.1	NA	NA	NA	NA		5.3963	3.86195	4.41402	2.97354	2.17464	2.3524	1.82283	0.866178	0.00821743	1	up	no
LOC105386017	LOC105386017	XM_011556496.1	NA	NA	NA	NA	trichohyalin-like	0.530936	0.660753	0.313363	0.145452	0.328169	0.084454	2.69686	1.43128	0.00839417	1	up	yes
MSTRG.15347	LOC105395960	MSTRG.15347.1	NA	NA	NA	NA		1.58666	2.15909	2.18378	2.85867	3.82395	4.92971	0.510625	-0.969665	0.00852007	1	down	no
MSTRG.14012	LOC105394010	MSTRG.14012.3;XM_011565846.1;MSTRG.14012.4;MSTRG.14012.2	GO:0005545(1-phosphatidylinositol binding);GO:0005905(clathrin-coated pit);GO:0006898(receptor-mediated endocytosis);GO:0007268(chemical synaptic transmission);GO:0007269(neurotransmitter secretion);GO:0007270(neuron-neuron synaptic transmission);GO:0008021(synaptic vesicle);GO:0016183(synaptic vesicle coating);GO:0030131(clathrin adaptor complex);GO:0030136(clathrin-coated vesicle);GO:0030276(cl…	04310(Wnt signaling pathway)	NA	NA	phosphatidylinositol-binding clathrin assembly protein LAP-like	0.852724	11.0877	12.1207	1.51355	3.62738	2.83994	3.01484	1.59208	0.00878048	1	up	yes
MSTRG.14617		MSTRG.14617.1	NA	NA	NA	NA		1.99101	0	0	5.96228	3.13412	7.15425	0.122519	-3.02892	0.00881335	1	down	yes
LOC105382941	LOC105382941	XM_011552934.1	GO:0000977(RNA polymerase II regulatory region sequence-specific DNA binding);GO:0000981(RNA polymerase II transcription factor activity, sequence-specific DNA binding);GO:0005634(nucleus)	05202(Transcriptional misregulation in cancers)	NA	NA	uncharacterized LOC105382941	1.25373	1.04699	1.21677	0.675601	0.466098	0.350866	2.35668	1.23676	0.00909105	1	up	yes
MSTRG.9175	LOC105387993	XM_011558817.1;XM_011558816.1	GO:0005549(odorant binding);GO:0005576(extracellular region);GO:0007608(sensory perception of smell);GO:0035274(diphenyl phthalate binding);GO:0035275(dibutyl phthalate binding);GO:0042048(olfactory behavior);GO:0042048(olfactory behavior)	NA	NA	NA	general odorant-binding protein 72-like%2C transcript variant X2	6.26603	4.93719	4.4388	7.54065	9.8021	8.80904	0.598124	-0.741483	0.00914801	1	down	no
MSTRG.14727	LOC105394984	MSTRG.14727.1;XM_011566901.1	GO:0004100(chitin synthase activity)	00520(Amino sugar and nucleotide sugar metabolism)	K00698	EC:2.4.1.16	uncharacterized LOC105394984	7.46572	8.99471	11.9353	12.5073	15.609	20.4073	0.585194	-0.773013	0.0092852	1	down	no
MSTRG.15661	LOC105396736	XM_011568741.1	GO:0004344(glucose dehydrogenase activity);GO:0005576(extracellular region);GO:0006006(glucose metabolic process);GO:0008364(pupal chitin-based cuticle development);GO:0016614(oxidoreductase activity, acting on CH-OH group of donors);GO:0019233(sensory perception of pain);GO:0042335(cuticle development);GO:0046693(sperm storage);GO:0050660(flavin adenine dinucleotide binding);GO:0055114(oxidation…	00260(Glycine, serine and threonine metabolism)	K00115	EC:1.1.5.9	glucose dehydrogenase [FAD%2C quinone]-like	6.02954	7.00595	4.74484	2.0251	5.32202	2.80555	1.7513	0.808423	0.00932564	1	up	no
MSTRG.2602		MSTRG.2602.1	NA	NA	NA	NA		1.05753	0.987476	0.652116	7.31871	0.650369	1.58281	0.282365	-1.82437	0.00932952	1	down	yes
LOC105393506	LOC105393506	XM_011565282.1	GO:0006820(anion transport);GO:0016021(integral component of membrane);GO:0022857(transmembrane transporter activity);GO:0055085(transmembrane transport)	04142(Lysosome)	K12301	NA	putative inorganic phosphate cotransporter	2.91081	1.46161	0.933285	0.893647	0.443293	0.678412	2.63264	1.39651	0.00933375	1	up	yes
MSTRG.13181		MSTRG.13181.1	NA	NA	NA	NA		0.152966	0.391708	1.73732	4.48735	2.64567	1.67183	0.259174	-1.94801	0.00945303	1	down	yes
MSTRG.14311	LOC105394394	XM_011566286.1	GO:0000003(reproduction);GO:0000166(nucleotide binding);GO:0000737(DNA catabolic process, endonucleolytic);GO:0002119(nematode larval development);GO:0003677(DNA binding);GO:0003723(RNA binding);GO:0004386(helicase activity);GO:0004518(nuclease activity);GO:0004519(endonuclease activity);GO:0004525(ribonuclease III activity);GO:0004530(deoxyribonuclease I activity);GO:0005524(ATP binding);GO:0005…	05206(MicroRNAs in cancer)	NA	NA	endoribonuclease Dicer-like	0.869287	1.75105	1.01584	5.82148	1.83982	1.27045	0.407106	-1.29652	0.00965701	1	down	yes
MSTRG.15576	LOC105396495	XM_011568496.1	GO:0005471(ATP:ADP antiporter activity);GO:0005743(mitochondrial inner membrane);GO:0005811(lipid particle);GO:0006839(mitochondrial transport);GO:0015866(ADP transport);GO:0015867(ATP transport);GO:0022857(transmembrane transporter activity);GO:0031966(mitochondrial membrane);GO:0055085(transmembrane transport)	04020(Calcium signaling pathway);04022(cGMP - PKG signaling pathway);05012(Parkinson's disease);05016(Huntington's disease);05166(HTLV-I infection)	NA	NA	ADP%2CATP carrier protein-like	19.2841	17.3309	12.6589	12.442	7.95136	9.37966	1.65499	0.72682	0.00985095	1	up	no
MSTRG.11749	LOC105391313	XM_011562778.1	GO:0004866(endopeptidase inhibitor activity);GO:0005198(structural molecule activity);GO:0005515(protein binding);GO:0005615(extracellular space);GO:0005886(plasma membrane);GO:0005918(septate junction);GO:0006910(phagocytosis, recognition);GO:0007391(dorsal closure);GO:0008258(head involution);GO:0016021(integral component of membrane);GO:0016323(basolateral plasma membrane);GO:0016324(apical pl…	04145(Phagosome);04610(Complement and coagulation cascades);05203(Viral carcinogenesis);05322(Systemic lupus erythematosus);05133(Pertussis);05134(Legionellosis);05150(Staphylococcus aureus infection);05152(Tuberculosis);05168(Herpes simplex infection);05140(Leishmaniasis);05142(Chagas disease (American trypanosomiasis))	NA	NA	uncharacterized LOC105391313	64.2972	64.1788	48.7767	84.4793	108.348	83.7504	0.640879	-0.641877	0.00985701	1	down	no
MSTRG.137	LOC105393928	XM_011565790.1;MSTRG.137.2	GO:0004375(glycine dehydrogenase (decarboxylating) activity);GO:0005960(glycine cleavage complex);GO:0006546(glycine catabolic process);GO:0055114(oxidation-reduction process)	01200(Carbon metabolism);00630(Glyoxylate and dicarboxylate metabolism);00260(Glycine, serine and threonine metabolism)	K00281	EC:1.4.4.2	glycine dehydrogenase (decarboxylating)%2C mitochondrial	8.30532	11.4234	7.93967	12.3678	15.8444	18.7725	0.58888	-0.763956	0.0098622	1	down	no
MSTRG.3139	LOC105380677	MSTRG.3139.2;XM_011550269.1;MSTRG.3139.5;MSTRG.3139.3;MSTRG.3139.4	GO:0003878(ATP citrate synthase activity);GO:0005524(ATP binding);GO:0005737(cytoplasm);GO:0005811(lipid particle);GO:0006085(acetyl-CoA biosynthetic process);GO:0006101(citrate metabolic process);GO:0010906(regulation of glucose metabolic process);GO:0048037(cofactor binding)	00020(Citrate cycle (TCA cycle))	K01648	EC:2.3.3.8	ATP-citrate synthase	19.5711	30.4023	16.8987	37.8824	34.643	36.2003	0.615054	-0.701216	0.00994623	1	down	no
MSTRG.2220	LOC105398443	XM_011570553.1	NA	NA	NA	NA	uncharacterized LOC105398443	3.42716	2.6862	4.17505	2.29533	1.30654	1.80189	1.90394	0.928985	0.0100208	1	up	no
MSTRG.14377	LOC105394473	XM_011566379.1;XM_011566380.1	GO:0005575(cellular_component);GO:0005634(nucleus);GO:0008150(biological_process);GO:0008270(zinc ion binding);GO:0016788(hydrolase activity, acting on ester bonds);GO:0016788(hydrolase activity, acting on ester bonds)	NA	NA	NA	ester hydrolase C11orf54 homolog%2C transcript variant X2	1.38001	2.81381	1.10779	2.8055	4.23597	3.85203	0.486676	-1.03897	0.0100783	1	down	yes
MSTRG.8059	LOC105386652	XM_011557262.1	NA	NA	NA	NA	uncharacterized LOC105386652	45.5676	25.7385	17.6501	19.6671	11.1914	18.8225	1.79055	0.840399	0.0103424	1	up	no
MSTRG.4011		MSTRG.4011.1	NA	NA	NA	NA		605.235	393.237	286.131	175.756	401.194	115.981	1.85387	0.890541	0.0105203	1	up	no
MSTRG.12860	LOC105392629	MSTRG.12860.1	NA	NA	NA	NA		11.0671	7.62805	7.21222	5.57788	6.11479	4.2303	1.62705	0.702255	0.0105244	1	up	no
MSTRG.6118		MSTRG.6118.1	NA	NA	NA	NA		8.14673	4.89513	5.54753	5.09794	2.88237	2.16449	1.83241	0.87374	0.0106344	1	up	no
MSTRG.316		MSTRG.316.1	NA	NA	NA	NA		5.94632	3.95747	5.61064	2.45137	1.8635	2.7963	2.1817	1.12545	0.0106479	1	up	yes
MSTRG.2542	LOC105398825;LOC105379989	XM_011571060.1;MSTRG.2542.2;XM_011549466.1	GO:0016491(oxidoreductase activity);GO:0016491(oxidoreductase activity)	00040(Pentose and glucuronate interconversions);00830(Retinol metabolism);04146(Peroxisome)	K11147	EC:1.1.-.-	estradiol 17-beta-dehydrogenase 8-like	6.47709	8.06461	3.94929	3.44528	4.87675	2.50612	1.70768	0.772035	0.0106676	1	up	no
MSTRG.1321	LOC105392796	XM_011564479.1;MSTRG.1321.2	GO:0008270(zinc ion binding);GO:0046872(metal ion binding)	00310(Lysine degradation)	K09189	EC:2.1.1.43	uncharacterized LOC105392796	7.34677	6.82849	7.01005	6.74293	1.59741	1.56296	2.13922	1.09708	0.0107113	1	up	yes
MSTRG.1332	LOC105392595	XM_011564247.1	GO:0005737(cytoplasm);GO:0035002(liquid clearance, open tracheal system);GO:0035149(lumen formation, open tracheal system);GO:0045177(apical part of cell);GO:0050062(long-chain-fatty-acyl-CoA reductase activity);GO:0080019(fatty-acyl-CoA reductase (alcohol-forming) activity)	00073(Cutin, suberine and wax);04146(Peroxisome)	K13356	EC:1.2.1.84	putative fatty acyl-CoA reductase CG5065	0.011806	0.721092	0.380038	1.22682	0.465461	3.67844	0.207223	-2.27074	0.0107898	1	down	yes
LOC105380565	LOC105380565	XM_011550146.1	NA	NA	NA	NA	uncharacterized LOC105380565	1.68566	1.29048	2.40324	0.875625	0.848686	0.870184	2.07338	1.05199	0.0110372	1	up	yes
MSTRG.5730		MSTRG.5730.2;MSTRG.5730.4;MSTRG.5730.1;MSTRG.5730.3;MSTRG.5730.5	NA	NA	NA	NA		8.78539	13.007	17.4642	11.0042	1.48932	1.63763	2.77802	1.47406	0.0113179	1	up	yes
MSTRG.14948	LOC105395357	XM_011567311.1	NA	NA	NA	NA	cuticle protein-like	0.200505	2.01421	1.24546	5.17495	0.892104	7.23388	0.260146	-1.94261	0.0113598	1	down	yes
MSTRG.12240	LOC105391878	XM_011563442.1	GO:0000010(trans-hexaprenyltranstransferase activity);GO:0008299(isoprenoid biosynthetic process);GO:0014019(neuroblast development);GO:0043066(negative regulation of apoptotic process)	00900(Terpenoid backbone biosynthesis)	K12504	EC:2.5.1.91	decaprenyl-diphosphate synthase subunit 1-like	11.711	11.9127	11.1242	25.1077	22.7243	13.552	0.566075	-0.820934	0.0114859	1	down	no
MSTRG.2708	LOC105380119	XM_011549617.1	GO:0005509(calcium ion binding);GO:0019899(enzyme binding)	04070(Phosphatidylinositol signaling system);04745(Phototransduction - fly)	K02183	NA	calmodulin-like	12.4101	9.43996	8.61475	4.21589	5.85066	7.79076	1.70601	0.770628	0.0115816	1	up	no
MSTRG.12492	LOC105392177	XM_011563774.1	GO:0005576(extracellular region);GO:0006030(chitin metabolic process);GO:0007599(hemostasis);GO:0008061(chitin binding);GO:0030246(carbohydrate binding);GO:0035006(melanization defense response);GO:0042060(wound healing);GO:0042381(hemolymph coagulation);GO:0042803(protein homodimerization activity)	04512(ECM-receptor interaction)	K03900	NA	hemocytin-like	0.220585	0.320567	0.192603	0.520844	0.77261	0.246304	0.476539	-1.06933	0.0117143	1	down	yes
MSTRG.7312	LOC105385730	XM_011556153.1	NA	NA	NA	NA	uncharacterized LOC105385730	14.3222	37.3199	30.7155	70.4781	23.3551	83.3047	0.464935	-1.1049	0.0118167	1	down	yes
MSTRG.6848	LOC105385161	XM_011555491.1	GO:0005887(integral component of plasma membrane);GO:0008514(organic anion transmembrane transporter activity)	04976(Bile secretion)	NA	NA	organic cation transporter protein-like	36.4843	51.6757	40.7083	30.4944	27.4635	30.0249	1.4647	0.550603	0.0118417	1	up	no
MSTRG.14755	LOC105395011	XM_011566926.1	NA	NA	NA	NA	cuticle protein 12.5-like	8.91878	20.9509	20.7433	43.3826	11.6242	71.6283	0.399676	-1.3231	0.0118426	1	down	yes
MSTRG.4740	LOC105382557	MSTRG.4740.1	NA	NA	NA	NA		12.117	11.4692	8.03547	6.69495	7.43323	4.84283	1.66684	0.737118	0.0120966	1	up	no
MSTRG.13752		MSTRG.13752.1	NA	NA	NA	NA		5.46582	4.36808	2.06417	1.26174	1.4105	2.8362	2.15997	1.11101	0.012125	1	up	yes
MSTRG.4835	LOC105382641	XM_011552558.1	NA	00480(Glutathione metabolism)	K05360	EC:1.8.4.2	thioredoxin domain-containing protein 12-like	20.6156	10.3382	8.80158	6.96049	3.69019	9.27136	1.99555	0.996785	0.0121976	1	up	no
LOC105389936	LOC105389936	XM_011561143.1;XM_011561142.1	NA	NA	NA	NA	uncharacterized LOC105389936%2C transcript variant X1	1.21072	0.912668	0.584024	1.97327	2.17332	1.34927	0.492627	-1.02143	0.012228	1	down	yes
MSTRG.9949		MSTRG.9949.1	NA	NA	NA	NA		12.5126	13.4074	8.84183	7.09121	8.66296	6.14056	1.58768	0.666922	0.0123135	1	up	no
MSTRG.3345	LOC105380929	XM_011550540.1;XM_011550541.1	GO:0005575(cellular_component);GO:0046872(metal ion binding);GO:0046872(metal ion binding)	NA	NA	NA	uncharacterized LOC105380929%2C transcript variant X1	8.04184	5.43701	4.62125	4.60291	3.59763	1.24314	1.91663	0.938575	0.0124344	1	up	no
LOC105385370	LOC105385370	XM_011555730.1	NA	NA	NA	NA	uncharacterized LOC105385370	0.428713	0.140127	1.12221	2.18616	0.909573	2.64761	0.294437	-1.76397	0.0126846	1	down	yes
LOC105384140	LOC105384140	XM_011554331.1	NA	NA	NA	NA	uncharacterized LOC105384140	5.74418	4.94874	3.86149	3.32783	2.95437	2.43456	1.6697	0.739592	0.0128947	1	up	no
LOC105390886	LOC105390886	XM_011562256.1	GO:0000977(RNA polymerase II regulatory region sequence-specific DNA binding);GO:0003700(transcription factor activity, sequence-specific DNA binding);GO:0006355(regulation of transcription, DNA-templated)	04110(Cell cycle);05202(Transcriptional misregulation in cancers)	NA	NA	zinc finger protein 2-like	3.21765	3.13755	4.43113	2.03065	1.94017	2.40052	1.69294	0.759532	0.0130941	1	up	no
MSTRG.2066	LOC105398308	MSTRG.2066.2;XM_011570382.1	GO:0004373(glycogen (starch) synthase activity);GO:0005977(glycogen metabolic process);GO:0005978(glycogen biosynthetic process);GO:0009267(cellular response to starvation);GO:0009744(response to sucrose);GO:0045819(positive regulation of glycogen catabolic process);GO:0071329(cellular response to sucrose stimulus)	00500(Starch and sucrose metabolism);04931(Insulin resistance)	K00693	EC:2.4.1.11	glycogen [starch] synthase-like	1.45857	2.82077	1.95453	1.15347	0.938464	1.47332	1.7485	0.80612	0.0131049	1	up	no
MSTRG.7565	LOC105386010	XM_011556487.1	NA	NA	NA	NA	uncharacterized LOC105386010	1.9275	2.72476	2.04986	3.70861	2.85196	7.92157	0.462785	-1.11159	0.0132946	1	down	yes
MSTRG.3035	LOC105380504	XR_960435.1	NA	NA	NA	NA	uncharacterized LOC105380504	5.45782	6.88882	3.8745	3.11079	2.582	2.30781	2.02749	1.01969	0.0133342	1	up	yes
MSTRG.1279	LOC105392167	XM_011563766.1	GO:0016491(oxidoreductase activity);GO:0046680(response to DDT);GO:0046701(insecticide catabolic process)	05204(Chemical carcinogenesis)	NA	NA	cytochrome P450 6k1-like	13.1185	18.7988	19.7119	44.158	24.0888	21.5842	0.574738	-0.799024	0.0133734	1	down	no
MSTRG.5159	LOC105383056	MSTRG.5159.2;XM_011553069.1	GO:0005739(mitochondrion)	NA	NA	NA	uncharacterized LOC105383056	5.58293	3.7043	6.07147	8.48211	6.58775	10.9549	0.590158	-0.760827	0.0135711	1	down	no
MSTRG.13517	LOC105393424	XM_011565184.1	GO:0003674(molecular_function);GO:0005737(cytoplasm);GO:0030488(tRNA methylation)	NA	NA	NA	thyroid adenoma-associated protein homolog	3.46912	3.37743	1.58072	1.60595	2.12076	1.25813	1.69058	0.757517	0.0135824	1	up	no
MSTRG.10529		MSTRG.10529.1	NA	NA	NA	NA		20.0535	30.6471	12.3891	48.9517	51.7169	23.1366	0.509588	-0.972596	0.0136462	1	down	no
LOC105390893	LOC105390893	XM_011562266.1	GO:0005089(Rho guanyl-nucleotide exchange factor activity);GO:0005826(actomyosin contractile ring);GO:0007015(actin filament organization);GO:0007277(pole cell development);GO:0007349(cellularization);GO:0007369(gastrulation);GO:0007370(ventral furrow formation);GO:0007374(posterior midgut invagination);GO:0007375(anterior midgut invagination);GO:0007377(germ-band extension);GO:0008360(regulation…	04810(Regulation of actin cytoskeleton);04270(Vascular smooth muscle contraction)	NA	NA	uncharacterized LOC105390893	0.15177	0.321638	0.156222	0.370365	0.892646	0.367042	0.386264	-1.37234	0.0139591	1	down	yes
MSTRG.14899	LOC105395219	XM_011567161.1	GO:0006497(protein lipidation);GO:0009408(response to heat);GO:0010506(regulation of autophagy);GO:0010998(regulation of translational initiation by eIF2 alpha phosphorylation);GO:0030018(Z disc);GO:0042026(protein refolding);GO:0045214(sarcomere organization);GO:0048471(perinuclear region of cytoplasm)	04141(Protein processing in endoplasmic reticulum);04213(Longevity regulating pathway - multiple species)	K09542	NA	protein lethal(2)essential for life-like	64.1188	40.2868	42.3723	32.7514	23.6983	34.9658	1.60561	0.683125	0.0142246	1	up	no
MSTRG.11099	LOC105390475	XM_011561784.1;MSTRG.11099.2	GO:0004601(peroxidase activity);GO:0005506(iron ion binding);GO:0005576(extracellular region);GO:0006909(phagocytosis);GO:0006979(response to oxidative stress);GO:0007306(eggshell chorion assembly);GO:0020037(heme binding);GO:0022008(neurogenesis);GO:0042600(chorion);GO:0045471(response to ethanol);GO:0055114(oxidation-reduction process)	00350(Tyrosine metabolism);04918(Thyroid hormone synthesis);05320(Autoimmune thyroid disease)	NA	NA	peroxidase-like	1.64093	5.95821	3.69976	8.12286	6.81436	6.98768	0.515346	-0.956388	0.0143828	1	down	no
MSTRG.7176	LOC105385586	XM_011555991.1	GO:0005351(sugar:proton symporter activity);GO:0005355(glucose transmembrane transporter activity);GO:0005887(integral component of plasma membrane);GO:0035428(hexose transmembrane transport);GO:0046323(glucose import)	04391(Hippo signaling pathway -fly);04144(Endocytosis)	NA	NA	facilitated trehalose transporter Tret1-like	7.61864	20.7128	7.65745	5.90732	7.43182	6.55136	1.80935	0.855474	0.0144125	1	up	no
MSTRG.2017	LOC105398214	XM_011570268.1	GO:0008028(monocarboxylic acid transmembrane transporter activity);GO:0015718(monocarboxylic acid transport);GO:0016021(integral component of membrane)	03460(Fanconi anemia pathway)	NA	NA	monocarboxylate transporter 10-like	1.77577	1.89047	1.24401	2.41777	3.324	2.71486	0.580639	-0.784287	0.0144283	1	down	no
MSTRG.9278	LOC105388120	XM_011558971.1	GO:0005576(extracellular region);GO:0005616(larval serum protein complex);GO:0005811(lipid particle);GO:0008045(motor neuron axon guidance);GO:0016201(synaptic target inhibition);GO:0045735(nutrient reservoir activity)	00350(Tyrosine metabolism);00740(Riboflavin metabolism)	NA	NA	basic juvenile hormone-suppressible protein 2-like	1.58613	1.35446	2.9791	0.528048	1.74065	0.278974	2.32357	1.21635	0.014529	1	up	yes
MSTRG.11434	LOC105390917	XM_011562293.1	GO:0006486(protein glycosylation);GO:0008417(fucosyltransferase activity);GO:0016021(integral component of membrane);GO:0032580(Golgi cisterna membrane);GO:0036065(fucosylation)	00514(Other types of O-glycan biosynthesis);00601(Glycosphingolipid biosynthesis - lacto and neolacto series)	NA	NA	alpha-(1%2C3)-fucosyltransferase C-like	7.31471	5.647	7.19217	4.27606	3.61829	4.88747	1.57676	0.656965	0.0146141	1	up	no
MSTRG.9065	LOC105387873	XM_011558671.1	GO:0001939(female pronucleus);GO:0005351(sugar:proton symporter activity);GO:0005355(glucose transmembrane transporter activity);GO:0005515(protein binding);GO:0005622(intracellular);GO:0005737(cytoplasm);GO:0005829(cytosol);GO:0005886(plasma membrane);GO:0005887(integral component of plasma membrane);GO:0005901(caveola);GO:0005911(cell-cell junction);GO:0006461(protein complex assembly);GO:00069…	04931(Insulin resistance)	NA	NA	solute carrier family 2%2C facilitated glucose transporter member 1-like	3.84185	2.19304	1.57798	1.56948	1.23341	1.13163	1.93489	0.952253	0.0146471	1	up	no
MSTRG.1461	LOC105394134	XM_011565976.1	GO:0008150(biological_process)	NA	NA	NA	leucine-rich repeat-containing protein 23-like	5.40909	2.1289	3.02212	2.22517	1.15925	2.01464	1.95592	0.967844	0.0147569	1	up	no
MSTRG.5317	LOC105383330	XM_011553367.1	GO:0005576(extracellular region);GO:0005615(extracellular space);GO:0006508(proteolysis);GO:0007289(spermatid nucleus differentiation);GO:0007291(sperm individualization);GO:0007552(metamorphosis);GO:0008237(metallopeptidase activity);GO:0008241(peptidyl-dipeptidase activity);GO:0008270(zinc ion binding);GO:0009609(response to symbiotic bacterium);GO:0016020(membrane)	00230(Purine metabolism);00240(Pyrimidine metabolism);03020(RNA polymerase)	NA	NA	angiotensin-converting enzyme-like	64.662	78.1471	46.1286	30.3193	59.1112	32.7571	1.54629	0.628813	0.0148232	1	up	no
MSTRG.12487	LOC105392179	XM_011563775.1	NA	NA	NA	NA	uncharacterized LOC105392179	2.53706	1.3176	1.96829	0.467587	1.233	0.956453	2.19151	1.13193	0.0149404	1	up	yes
MSTRG.1913	LOC105398083	XM_011570135.1	NA	NA	NA	NA	keratin-associated protein 19-2-like	83.6505	53.395	30.8087	192.026	158.21	36.7806	0.433712	-1.20519	0.0149862	1	down	yes
MSTRG.7098	LOC105385493	XM_011555882.1;XM_011555881.1;MSTRG.7098.1	NA	NA	NA	NA	cysteine and glycine-rich protein 3-like%2C transcript variant X2	17.5693	10.8518	10.7726	10.0125	6.06066	7.9517	1.63138	0.706092	0.0150086	1	up	no
MSTRG.10285	LOC105389423	XM_011560526.1	GO:0004806(triglyceride lipase activity);GO:0048812(neuron projection morphogenesis)	00100(Steroid biosynthesis);04142(Lysosome)	K01052	EC:3.1.1.13	lipase 3-like	9.92282	7.45144	12.7133	7.03519	6.5995	5.45978	1.57572	0.656014	0.0150287	1	up	no
MSTRG.2928	LOC105380450	MSTRG.2928.1	NA	NA	NA	NA		37.3571	24.9758	22.2311	105.822	28.9466	40.3489	0.482897	-1.05021	0.0151233	1	down	yes
MSTRG.3819		MSTRG.3819.1;MSTRG.3819.2	NA	NA	NA	NA		14.2038	14.7662	9.85779	22.1343	24.8205	17.5471	0.601965	-0.732249	0.0151563	1	down	no
MSTRG.11011	LOC105390367	XM_011561658.1	GO:0000902(cell morphogenesis);GO:0003989(acetyl-CoA carboxylase activity);GO:0004075(biotin carboxylase activity);GO:0005524(ATP binding);GO:0005737(cytoplasm);GO:0005811(lipid particle);GO:0005977(glycogen metabolic process);GO:0006633(fatty acid biosynthetic process);GO:0008593(regulation of Notch signaling pathway);GO:0009744(response to sucrose);GO:0019432(triglyceride biosynthetic process);…	01212(Fatty acid metabolism);00620(Pyruvate metabolism);00640(Propanoate metabolism);00061(Fatty acid biosynthesis);00254(Aflatoxin)	K11262	EC:6.4.1.2;EC:6.3.4.14	acetyl-CoA carboxylase 1-like	0.423305	1.48954	1.34515	2.01751	2.34884	2.15888	0.499291	-1.00205	0.0152439	1	down	yes
MSTRG.9075	LOC105387865	XM_011558660.1	NA	NA	NA	NA	protein CASC1-like	0.6832	0.43244	0.470092	0.245019	0.293393	0.238823	2.04022	1.02873	0.0154798	1	up	yes
MSTRG.13205	LOC105393054	XM_011564765.1	GO:0003674(molecular_function);GO:0005887(integral component of plasma membrane);GO:0008150(biological_process)	NA	NA	NA	uncharacterized LOC105393054	142.793	182.669	190.663	281.488	392.767	179.152	0.604781	-0.725515	0.0156471	1	down	no
MSTRG.415	LOC105381292	XM_011550987.1;XM_011550996.1	GO:0005615(extracellular space);GO:0042302(structural constituent of cuticle);GO:0042302(structural constituent of cuticle)	NA	NA	NA	larval cuticle protein LCP-22-like%2C transcript variant X2	15.3868	35.2195	32.9959	59.3939	37.4725	51.1864	0.564678	-0.824499	0.015749	1	down	no
MSTRG.3641	LOC105381246	XM_011550934.1	GO:0005886(plasma membrane);GO:0015574(trehalose transmembrane transporter activity);GO:0015767(lactose transport);GO:0015768(maltose transport);GO:0015770(sucrose transport);GO:0015771(trehalose transport)	05231(Choline metabolism in cancer)	NA	NA	facilitated trehalose transporter Tret1-like	1.8638	1.72832	1.41574	2.86545	2.8046	3.00629	0.577185	-0.792895	0.0159085	1	down	no
MSTRG.10844		MSTRG.10844.1	NA	NA	NA	NA		7.69569	8.26654	6.63392	4.49233	4.33769	3.03742	1.90404	0.929067	0.0159267	1	up	no
MSTRG.6453	LOC105384697	XM_011554973.1	GO:0004768(stearoyl-CoA 9-desaturase activity);GO:0005783(endoplasmic reticulum);GO:0005811(lipid particle);GO:0006633(fatty acid biosynthetic process);GO:0006723(cuticle hydrocarbon biosynthetic process);GO:0009744(response to sucrose);GO:0010506(regulation of autophagy);GO:0016021(integral component of membrane);GO:0019216(regulation of lipid metabolic process);GO:0031410(cytoplasmic vesicle);G…	01212(Fatty acid metabolism);01040(Biosynthesis of unsaturated fatty acids)	K00507	EC:1.14.19.1	acyl-CoA Delta(11) desaturase-like	17.8438	44.5305	25.7125	52.346	35.8027	71.9695	0.550136	-0.86214	0.0160216	1	down	no
MSTRG.14675	LOC105394920	MSTRG.14675.1	NA	NA	NA	NA		2.19932	1.37143	2.23118	5.78386	2.64358	3.28939	0.49518	-1.01398	0.0163011	1	down	yes
MSTRG.5804	LOC105383903	XM_011554040.1	GO:0003777(microtubule motor activity);GO:0005871(kinesin complex);GO:0007018(microtubule-based movement);GO:0016887(ATPase activity)	04144(Endocytosis)	NA	NA	kinesin-like protein KIF21B	1.09915	1.46198	1.43341	2.33809	2.32507	1.90841	0.607851	-0.71821	0.0165519	1	down	no
MSTRG.8077	LOC105386665	MSTRG.8077.1	NA	NA	NA	NA		1.66825	1.81871	1.09336	5.83399	3.04261	2.50525	0.402423	-1.31321	0.0165607	1	down	yes
MSTRG.597	LOC105383869	MSTRG.597.1	NA	NA	NA	NA		11.1145	9.32637	8.55747	6.41334	3.78047	6.99488	1.68706	0.754509	0.016614	1	up	no
MSTRG.4856	LOC105382697	XM_011552623.1	GO:0000407(pre-autophagosomal structure);GO:0001934(positive regulation of protein phosphorylation);GO:0006914(autophagy);GO:0009267(cellular response to starvation);GO:0016236(macroautophagy);GO:0019887(protein kinase regulator activity);GO:0032147(activation of protein kinase activity);GO:0035071(salivary gland cell autophagic cell death);GO:0035096(larval midgut cell programmed cell death);GO:…	04211(Longevity regulating pathway - mammal)	K17589	NA	RB1-inducible coiled-coil protein 1-like	0.177886	0.506066	0.521853	0.70544	1.48848	0.746298	0.410107	-1.28593	0.0166252	1	down	yes
MSTRG.16052	LOC105397642	XM_011569660.1	GO:0000166(nucleotide binding);GO:0000398(mRNA splicing, via spliceosome);GO:0003676(nucleic acid binding);GO:0003729(mRNA binding)	03015(mRNA surveillance pathway)	NA	NA	protein SCAF8-like	0.952551	2.39369	1.42072	3.37899	4.53313	2.29022	0.467242	-1.09776	0.0166319	1	down	yes
LOC105387691	LOC105387691	XM_011558457.1	NA	NA	NA	NA	uncharacterized LOC105387691	0.947481	0.854403	0.751747	1.37473	1.99091	1.38917	0.537063	-0.896837	0.0166926	1	down	no
MSTRG.14096	LOC105394106	XM_011565946.1	GO:0008422(beta-glucosidase activity);GO:1901657(glycosyl compound metabolic process)	00052(Galactose metabolism)	K01229	EC:3.2.1.108;EC:3.2.1.62	myrosinase 1-like	2.64046	9.71384	4.78536	9.90658	8.26567	17.2878	0.483351	-1.04886	0.0169291	1	down	yes
MSTRG.15299	LOC105395875	XM_011567851.1	GO:0004768(stearoyl-CoA 9-desaturase activity);GO:0005783(endoplasmic reticulum);GO:0005811(lipid particle);GO:0006633(fatty acid biosynthetic process);GO:0006723(cuticle hydrocarbon biosynthetic process);GO:0009744(response to sucrose);GO:0010506(regulation of autophagy);GO:0016021(integral component of membrane);GO:0019216(regulation of lipid metabolic process);GO:0031410(cytoplasmic vesicle);G…	01212(Fatty acid metabolism);01040(Biosynthesis of unsaturated fatty acids)	K00507	EC:1.14.19.1	acyl-CoA Delta(11) desaturase-like	8.7304	22.532	11.9579	26.7487	18.6758	33.0699	0.550617	-0.860878	0.0171479	1	down	no
MSTRG.7034	LOC105385434	XM_011555815.1	NA	NA	NA	NA	uncharacterized LOC105385434	6.14472	6.00542	3.70298	3.05301	4.27815	1.98554	1.70158	0.766876	0.0172237	1	up	no
MSTRG.7460	LOC105385896	XM_011556342.1	GO:0004838(L-tyrosine:2-oxoglutarate aminotransferase activity);GO:0009058(biosynthetic process);GO:0009072(aromatic amino acid family metabolic process);GO:0030170(pyridoxal phosphate binding)	01230(Biosynthesis of amino acids);00270(Cysteine and methionine metabolism);00350(Tyrosine metabolism);00360(Phenylalanine metabolism);00400(Phenylalanine, tyrosine and tryptophan biosynthesis);00130(Ubiquinone and other terpenoid-quinone biosynthesis)	K00815	EC:2.6.1.5	tyrosine aminotransferase	15.0866	17.9517	16.1952	29.2052	22.9134	23.7631	0.648819	-0.624111	0.0172873	1	down	no
MSTRG.10703		MSTRG.10703.1	NA	NA	NA	NA		3.89158	1.46484	0.594445	6.2878	10.1775	2.37841	0.315801	-1.66291	0.0172876	1	down	yes
MSTRG.13079	LOC105392908	XM_011564596.1	NA	NA	NA	NA	keratin-associated protein 19-2-like	24.9825	16.3434	6.49915	44.9863	40.4918	17.1087	0.466191	-1.10101	0.0172933	1	down	yes
LOC105395425	LOC105395425	XM_011567380.1	GO:0006810(transport);GO:0008514(organic anion transmembrane transporter activity);GO:0015347(sodium-independent organic anion transmembrane transporter activity);GO:0015711(organic anion transport);GO:0016020(membrane)	NA	NA	NA	solute carrier organic anion transporter family member 3A1-like	0.515335	0.835304	0.23969	1.66205	2.07299	0.669597	0.361057	-1.4697	0.0173626	1	down	yes
MSTRG.9773	LOC105388763	MSTRG.9773.1	NA	NA	NA	NA		18.0036	17.6098	14.3115	11.2484	12.9157	8.67666	1.52021	0.604273	0.017434	1	up	no
MSTRG.4365	LOC105382119	XM_011551949.1	GO:0000212(meiotic spindle organization);GO:0000915(actomyosin contractile ring assembly);GO:0007110(meiosis I cytokinesis);GO:0007111(meiosis II cytokinesis);GO:0007112(male meiosis cytokinesis);GO:0009922(fatty acid elongase activity);GO:0016021(integral component of membrane);GO:0030497(fatty acid elongation);GO:0042761(very long-chain fatty acid biosynthetic process);GO:0042811(pheromone bios…	00062(Fatty acid elongation)	K10249	EC:2.3.1.199	elongation of very long chain fatty acids protein AAEL008004-like	0.94835	1.45687	0.806183	2.25418	0.432489	7.57188	0.313047	-1.67555	0.0176947	1	down	yes
MSTRG.4687	LOC105382507	MSTRG.4687.1;XM_011552400.1	NA	NA	NA	NA	transcription factor SPT20 homolog	39.163	32.3482	30.6417	32.3361	19.4733	10.5212	1.63889	0.712719	0.017818	1	up	no
MSTRG.14309	LOC105394391	MSTRG.14309.1	NA	NA	NA	NA		5.94064	6.11488	4.45122	22.982	6.53005	6.02751	0.464461	-1.10637	0.0178733	1	down	yes
MSTRG.11619	LOC105391148	MSTRG.11619.1	NA	NA	NA	NA		1.80783	8.54447	1.82884	8.54352	9.45913	8.78467	0.454735	-1.1369	0.0179188	1	down	yes
MSTRG.12355		MSTRG.12355.1	NA	NA	NA	NA		2.94908	2.47716	1.39087	3.85926	4.38361	4.64004	0.529158	-0.918229	0.0179912	1	down	no
MSTRG.14733		MSTRG.14733.1	NA	NA	NA	NA		6.03493	2.90614	5.66342	3.0827	2.60679	1.92486	1.91802	0.939619	0.0181399	1	up	no
MSTRG.9812	LOC105388789	XM_011559763.1;XM_011559764.1;XM_011559765.1	GO:0003700(transcription factor activity, sequence-specific DNA binding);GO:0003707(steroid hormone receptor activity);GO:0004879(RNA polymerase II transcription factor activity, ligand-activated sequence-specific DNA binding);GO:0005634(nucleus);GO:0006357(regulation of transcription from RNA polymerase II promoter);GO:0007492(endoderm development);GO:0007498(mesoderm development);GO:0008270(zin…	04950(Maturity onset diabetes of the young);04950(Maturity onset diabetes of the young)	NA	NA	transcription factor HNF-4 homolog%2C transcript variant X3	0.792593	0.860725	0.720256	1.5111	1.12077	1.62448	0.557655	-0.842555	0.0183183	1	down	no
MSTRG.15344	LOC105395954	XM_011567938.1	GO:0000977(RNA polymerase II regulatory region sequence-specific DNA binding);GO:0003700(transcription factor activity, sequence-specific DNA binding);GO:0005634(nucleus);GO:0006357(regulation of transcription from RNA polymerase II promoter)	NA	K14312	NA	zinc finger BED domain-containing protein 1-like	1.17349	0.605514	0.661545	0.451842	0.434288	0.381523	1.92525	0.945046	0.0185825	1	up	no
MSTRG.883	LOC105387319	MSTRG.883.1	NA	NA	NA	NA		3.97878	5.63588	6.151	2.43665	2.93723	2.98801	1.88542	0.914886	0.0186156	1	up	no
MSTRG.9920	LOC105388927	XM_011559964.1	GO:0000045(autophagosome assembly);GO:0001934(positive regulation of protein phosphorylation);GO:0019901(protein kinase binding);GO:0034045(pre-autophagosomal structure membrane);GO:1990316(ATG1/ULK1 kinase complex)	04211(Longevity regulating pathway - mammal)	K17589	NA	RB1-inducible coiled-coil protein 1-like	0.482255	0.650993	0.786138	0.855565	1.27589	1.31641	0.556689	-0.845057	0.0186693	1	down	no
MSTRG.10163	LOC105389273	XM_011560363.1	NA	NA	NA	NA	serine/arginine repetitive matrix protein 1-like	2.4297	2.15227	2.81733	1.48999	0.875769	1.74329	1.80073	0.848584	0.0187516	1	up	no
MSTRG.1958	LOC105398123	XR_961188.1;XM_011570177.1	GO:0004842(ubiquitin-protein transferase activity);GO:0005634(nucleus);GO:0005737(cytoplasm);GO:0006511(ubiquitin-dependent protein catabolic process);GO:0006915(apoptotic process);GO:0007275(multicellular organism development);GO:0008270(zinc ion binding);GO:0016567(protein ubiquitination);GO:0016874(ligase activity);GO:0042787(protein ubiquitination involved in ubiquitin-dependent protein catab…	04120(Ubiquitin mediated proteolysis);04310(Wnt signaling pathway);04310(Wnt signaling pathway)	K04506	EC:2.3.2.27	E3 ubiquitin-protein ligase SIAH1-like%2C transcript variant X2	10.6908	16.6255	11.1936	40.1676	16.7779	14.2404	0.540976	-0.886365	0.0187672	1	down	no
MSTRG.5012	LOC105382878	XM_011552848.1;XM_011552850.1;XM_011552849.1	NA	NA	NA	NA	putative malate dehydrogenase 1B%2C transcript variant X2	0.856938	0.772365	0.90106	0.57537	0.446113	0.180328	2.10546	1.07413	0.0187996	1	up	yes
MSTRG.13668	LOC105393619	XM_011565408.1;XM_011565407.1	GO:0009820(alkaloid metabolic process);GO:0033784(senecionine N-oxygenase activity);GO:0050660(flavin adenine dinucleotide binding);GO:0051289(protein homotetramerization);GO:0055114(oxidation-reduction process);GO:0055114(oxidation-reduction process)	00982(Drug metabolism - cytochrome P450);00982(Drug metabolism - cytochrome P450)	K00485	EC:1.14.13.8	senecionine N-oxygenase-like%2C transcript variant X1	3.92536	4.42537	5.28488	7.86392	7.96541	6.2992	0.6162	-0.698529	0.0188731	1	down	no
MSTRG.2132	LOC105398359	XM_011570435.1	GO:0005351(sugar:proton symporter activity);GO:0005355(glucose transmembrane transporter activity);GO:0005887(integral component of plasma membrane);GO:0035428(hexose transmembrane transport);GO:0046323(glucose import)	04911(Insulin secretion);04922(Glucagon signaling pathway);04917(Prolactin signaling pathway);04973(Carbohydrate digestion and absorption);05230(Central carbon metabolism in cancer);04930(Type II diabetes mellitus);04950(Maturity onset diabetes of the young);04931(Insulin resistance)	NA	NA	facilitated trehalose transporter Tret1-like	0.358122	1.01744	0.37894	0.997189	1.14143	1.75983	0.450051	-1.15184	0.0188761	1	down	yes
MSTRG.14751	LOC105395006	XM_011566923.1	NA	NA	NA	NA	cyclin-dependent kinase inhibitor 1C-like	183.076	243.759	297.876	421.558	426.49	295.81	0.633567	-0.658431	0.0189586	1	down	no
MSTRG.12150	LOC105391780	XM_011563327.1	GO:0000010(trans-hexaprenyltranstransferase activity);GO:0008299(isoprenoid biosynthetic process);GO:0014019(neuroblast development);GO:0043066(negative regulation of apoptotic process)	00900(Terpenoid backbone biosynthesis)	K12504	EC:2.5.1.91	uncharacterized LOC105391780	7.75759	15.1133	12.447	22.4819	22.0353	14.9173	0.594233	-0.7509	0.0190953	1	down	no
MSTRG.6456	LOC105384714	XM_011554992.1	NA	04140(Regulation of autophagy)	NA	NA	uncharacterized LOC105384714	0.774428	0.577607	0.830692	1.56102	1.572	1.45479	0.475767	-1.07167	0.0191948	1	down	yes
LOC105398512	LOC105398512	XM_011570630.1	GO:0003777(microtubule motor activity);GO:0005524(ATP binding);GO:0007018(microtubule-based movement);GO:0016887(ATPase activity);GO:0030286(dynein complex)	05016(Huntington's disease)	NA	NA	dynein heavy chain 3%2C axonemal-like	0.802019	0.43721	0.94363	0.472214	0.344018	0.410455	1.77948	0.831452	0.0192851	1	up	no
MSTRG.15489	LOC105396302	XM_011568291.1	GO:0003674(molecular_function);GO:0005783(endoplasmic reticulum);GO:0007030(Golgi organization);GO:0009306(protein secretion)	NA	K21248	NA	vacuole membrane protein 1-like	3.00589	3.74316	3.40398	5.37232	7.40259	4.27048	0.595647	-0.747472	0.0195147	1	down	no
LOC105392103	LOC105392103	LOC105392103	NA	NA	NA	NA		2.60153	2.8548	2.48564	1.58079	2.03023	0.810022	1.7964	0.84511	0.0197287	1	up	no
MSTRG.13	ND1	MSTRG.13.1	NA	NA	NA	NA		9177.97	6424.9	10404.3	4800.33	4563.17	7443.88	1.54737	0.629816	0.0198073	1	up	no
MSTRG.13306	LOC105393172	XM_011564907.1	GO:0005576(extracellular region);GO:0007552(metamorphosis);GO:0009615(response to virus);GO:0045297(post-mating behavior)	NA	NA	NA	ejaculatory bulb-specific protein 3-like	77.1199	91.4448	88.1334	169.18	92.6861	147.846	0.626532	-0.67454	0.019835	1	down	no
MSTRG.7418	LOC105385858	XM_011556302.1	GO:0003351(epithelial cilium movement);GO:0003777(microtubule motor activity);GO:0005524(ATP binding);GO:0016887(ATPase activity);GO:0030317(sperm motility);GO:0036126(sperm flagellum);GO:0036156(inner dynein arm);GO:0036159(inner dynein arm assembly);GO:0060294(cilium movement involved in cell motility)	05016(Huntington's disease)	NA	NA	dynein heavy chain 1%2C axonemal-like	0.696844	0.451013	0.693887	0.446818	0.372057	0.361275	1.5606	0.642102	0.0201305	1	up	no
MSTRG.11596	LOC105391105	XM_011562520.1;XM_011562519.1	NA	NA	NA	NA	uncharacterized LOC105391105%2C transcript variant X1	2.22488	1.71077	1.75806	1.26986	1.15141	1.36294	1.5046	0.589379	0.0202946	1	up	no
MSTRG.12298	LOC105391945	XM_011563519.1	NA	NA	NA	NA	uncharacterized LOC105391945	5.37189	5.17646	6.31073	11.7839	7.52601	10.1011	0.573223	-0.802831	0.0203323	1	down	no
MSTRG.10508	LOC105389730	XM_011560899.1;MSTRG.10508.3;MSTRG.10508.4;XM_011560898.1	NA	NA	NA	NA	uncharacterized LOC105389730%2C transcript variant X1	21.3421	38.1214	29.388	48.2131	42.8761	46.8103	0.64432	-0.63415	0.0203417	1	down	no
MSTRG.6855	LOC105385163	XM_011555495.1	GO:0004017(adenylate kinase activity);GO:0005524(ATP binding);GO:0005634(nucleus);GO:0005737(cytoplasm);GO:0006139(nucleobase-containing compound metabolic process);GO:0006207('de novo' pyrimidine nucleobase biosynthetic process);GO:0009041(uridylate kinase activity);GO:0019233(sensory perception of pain);GO:0046034(ATP metabolic process)	00230(Purine metabolism)	K00939	EC:2.7.4.3	adenylate kinase isoenzyme 1-like	5.85256	3.9241	3.13443	2.22847	2.16551	3.04087	1.73657	0.796238	0.0206048	1	up	no
MSTRG.2264	LOC105398481	MSTRG.2264.1	NA	NA	NA	NA		3.65464	1.51182	0.644767	1.2548	0.545018	0.364734	2.68472	1.42477	0.0206132	1	up	yes
MSTRG.13903	LOC105393889	XM_011565710.1	GO:0000981(RNA polymerase II transcription factor activity, sequence-specific DNA binding);GO:0001077(transcriptional activator activity, RNA polymerase II core promoter proximal region sequence-specific binding);GO:0002230(positive regulation of defense response to virus by host);GO:0003677(DNA binding);GO:0003700(transcription factor activity, sequence-specific DNA binding);GO:0005515(protein b…	04010(MAPK signaling pathway)	K02580	NA	nuclear factor NF-kappa-B p110 subunit-like	2.92744	2.54219	2.36183	4.28261	4.73272	3.67614	0.617066	-0.696504	0.0208392	1	down	no
MSTRG.10837	LOC105390169	XM_011561420.1;XM_011561419.1;MSTRG.10837.5;MSTRG.10837.1;MSTRG.10837.6;MSTRG.10837.2	GO:0003934(GTP cyclohydrolase I activity);GO:0005737(cytoplasm);GO:0006728(pteridine biosynthetic process);GO:0006729(tetrahydrobiopterin biosynthetic process);GO:0008363(larval chitin-based cuticle development);GO:0009880(embryonic pattern specification);GO:0035185(preblastoderm mitotic cell cycle);GO:0043095(regulation of GTP cyclohydrolase I activity);GO:0046654(tetrahydrofolate biosynthetic p…	00790(Folate biosynthesis);00790(Folate biosynthesis)	K01495	EC:3.5.4.16	GTP cyclohydrolase 1%2C transcript variant X2	24.3319	48.7417	24.9033	44.2726	47.3276	73.3467	0.593991	-0.751488	0.0209306	1	down	no
MSTRG.11237		MSTRG.11237.1	NA	NA	NA	NA		125.102	45.8847	67.4454	36.124	74.508	22.9883	1.7844	0.835436	0.02112	1	up	no
MSTRG.1346	LOC105392939	XM_011564634.1	GO:0007165(signal transduction);GO:0017049(GTP-Rho binding)	00900(Terpenoid backbone biosynthesis)	NA	NA	rhophilin-2-B-like	1.0488	1.33934	1.39048	1.92302	1.61903	2.94666	0.582337	-0.780074	0.0213348	1	down	no
MSTRG.12024	LOC105391621	XM_011563125.1	GO:0004197(cysteine-type endopeptidase activity);GO:0005811(lipid particle);GO:0005875(microtubule associated complex);GO:0006508(proteolysis)	04142(Lysosome)	K10848	EC:3.1.-.-	uncharacterized LOC105391621	0.986362	1.40948	0.963354	1.85295	2.03735	1.57607	0.614521	-0.702466	0.0213854	1	down	no
MSTRG.12464	LOC105392144	MSTRG.12464.1	NA	NA	NA	NA		5.58771	5.56237	5.87899	2.91422	4.01415	3.12904	1.69319	0.759742	0.0214736	1	up	no
MSTRG.5267		MSTRG.5267.1	NA	NA	NA	NA		13.1281	7.96169	8.92463	4.79326	5.6919	6.87246	1.72918	0.790089	0.0216458	1	up	no
MSTRG.6187	LOC105384383	MSTRG.6187.1;XM_011554614.1	GO:0005214(structural constituent of chitin-based cuticle);GO:0008010(structural constituent of chitin-based larval cuticle);GO:0031012(extracellular matrix);GO:0040003(chitin-based cuticle development)	00230(Purine metabolism);00240(Pyrimidine metabolism);03020(RNA polymerase)	NA	NA	intron-binding protein aquarius%2C transcript variant X1	8.86757	12.225	14.5909	27.3995	16.1039	17.5755	0.58422	-0.775417	0.021682	1	down	no
MSTRG.9722	LOC105388702	XM_011559654.1	GO:0042995(cell projection)	NA	NA	NA	cilia- and flagella-associated protein 44-like	0.673449	0.614198	0.646383	0.513437	0.35005	0.333032	1.61638	0.692767	0.0218198	1	up	no
MSTRG.1389		MSTRG.1389.1	NA	NA	NA	NA		22.0765	33.3502	44.8922	13.88	27.7752	19.154	1.64973	0.722232	0.0219197	1	up	no
MSTRG.14310	LOC105394392	XM_011566284.1	GO:0003725(double-stranded RNA binding);GO:0003727(single-stranded RNA binding);GO:0005515(protein binding);GO:0005634(nucleus);GO:0005737(cytoplasm);GO:0007279(pole cell formation);GO:0007294(germarium-derived oocyte fate determination);GO:0007367(segment polarity determination);GO:0016246(RNA interference);GO:0016442(RISC complex);GO:0016443(bidentate ribonuclease III activity);GO:0030422(produ…	03008(Ribosome biogenesis in eukaryotes)	NA	NA	endoribonuclease Dcr-1-like	0.922376	1.02504	1.20711	3.46216	1.64261	1.29677	0.492776	-1.021	0.0219249	1	down	yes
MSTRG.2700		MSTRG.2700.1	NA	NA	NA	NA		5.46684	2.36061	4.00854	2.42616	1.65261	1.14955	2.26382	1.17876	0.0219514	1	up	yes
LOC105381209	LOC105381209	XM_011550895.1	GO:0001751(compound eye photoreceptor cell differentiation);GO:0001752(compound eye photoreceptor fate commitment);GO:0004521(endoribonuclease activity);GO:0004672(protein kinase activity);GO:0004674(protein serine/threonine kinase activity);GO:0005524(ATP binding);GO:0005783(endoplasmic reticulum);GO:0006402(mRNA catabolic process);GO:0006468(protein phosphorylation);GO:0006986(response to unfol…	04141(Protein processing in endoplasmic reticulum)	K08852	EC:2.7.11.1;EC:3.1.26.-	serine/threonine-protein kinase/endoribonuclease IRE1	0.698417	1.09063	0.708737	1.39043	1.71882	1.30445	0.565917	-0.821338	0.0219913	1	down	no
MSTRG.1860	LOC105398002	XM_011570051.1;XM_011570049.1	NA	NA	NA	NA	uncharacterized LOC105398002%2C transcript variant X1	9.80713	9.82585	10.3177	17.7277	19.2797	10.2713	0.633491	-0.658604	0.022073	1	down	no
MSTRG.9779	LOC105388767	XM_011559730.1;XM_011559731.1;XM_011559729.1	NA	NA	NA	NA	uncharacterized LOC105388767%2C transcript variant X3	1.1656	0.0739004	0.445344	5.85193	2.17451	0.105717	0.207183	-2.27102	0.0221067	1	down	yes
MSTRG.1782		MSTRG.1782.1	NA	NA	NA	NA		39.5592	13.2293	21.6039	11.5828	22.6922	6.56532	1.82154	0.865159	0.0221082	1	up	no
MSTRG.6159	LOC105384319	XM_011554534.1	NA	NA	NA	NA	uncharacterized LOC105384319%2C transcript variant X2	5.90834	4.5362	3.34364	3.18565	2.66928	2.98687	1.55943	0.64102	0.0221728	1	up	no
MSTRG.12700	LOC105392432	MSTRG.12700.1	NA	NA	NA	NA		4.65151	3.04447	3.49424	8.27115	6.35002	5.05127	0.568827	-0.813939	0.0221989	1	down	no
MSTRG.10964	LOC105390307	XM_011561584.1;XM_011561585.1;XM_011561583.1;XM_011561586.1	NA	NA	NA	NA	uncharacterized protein LOC105390307 isoform X3	2.61286	2.49892	2.55896	1.69615	0.988329	1.74352	1.73233	0.792711	0.022238	1	up	no
MSTRG.4939		MSTRG.4939.1	NA	NA	NA	NA		2.39755	2.54554	0.784993	5.40691	3.72138	3.97185	0.437253	-1.19346	0.0222416	1	down	yes
LOC105386002	LOC105386002	XM_011556472.1;XM_011556473.1	NA	04013(MAPK signaling pathway - fly);04630(Jak-STAT signaling pathway);04068(FoxO signaling pathway);04320(Dorso-ventral axis formation);04320(Dorso-ventral axis formation)	NA	NA	uncharacterized LOC105386002%2C transcript variant X2	2.90423	2.50363	2.9994	1.67722	2.24496	1.53793	1.53976	0.622707	0.0225833	1	up	no
MSTRG.6164	LOC105384324;LOC105384323	MSTRG.6164.1;XM_011554540.1;XM_011554539.1	NA	NA	NA	NA	uncharacterized LOC105384324;uncharacterized LOC105384323	12.6851	16.5686	14.9506	46.427	16.3473	17.4768	0.550825	-0.860333	0.022687	1	down	no
MSTRG.9469	LOC105388348	XM_011559239.1;XM_011559240.1;XM_011559241.1	GO:0004252(serine-type endopeptidase activity);GO:0005737(cytoplasm);GO:0006508(proteolysis);GO:0006508(proteolysis)	04614(Renin-angiotensin system);04614(Renin-angiotensin system)	NA	NA	prolyl endopeptidase%2C transcript variant X2	2.19009	2.93403	1.96638	8.64742	3.19446	2.33094	0.500288	-0.999168	0.0226902	1	down	no
MSTRG.12058	LOC105391651	XM_011563163.1	GO:0008513(secondary active organic cation transmembrane transporter activity);GO:0016021(integral component of membrane);GO:0055085(transmembrane transport)	05231(Choline metabolism in cancer)	NA	NA	organic cation transporter protein-like	1.51048	2.72459	2.0129	3.53414	2.54584	4.8449	0.571903	-0.806159	0.0227311	1	down	no
MSTRG.1290	LOC105392259	XM_011563863.1	GO:0004725(protein tyrosine phosphatase activity);GO:0005634(nucleus);GO:0006470(protein dephosphorylation);GO:0008138(protein tyrosine/serine/threonine phosphatase activity);GO:0016791(phosphatase activity);GO:0043508(negative regulation of JUN kinase activity)	04010(MAPK signaling pathway)	NA	NA	dual specificity protein phosphatase 1B-like	10.8816	6.85871	7.27866	6.30337	3.51743	5.44693	1.63868	0.712537	0.0227392	1	up	no
MSTRG.14585	LOC105394796	XM_011566717.1	NA	NA	NA	NA	skin secretory protein xP2-like	475.431	480.444	361.705	307.641	342.668	309.293	1.37305	0.457381	0.0231344	1	up	no
MSTRG.16089		MSTRG.16089.1	NA	NA	NA	NA		16.4564	11.9772	7.77465	5.59544	8.01233	8.67979	1.62459	0.70008	0.023135	1	up	no
MSTRG.2395	LOC105398645	XM_011570799.1;MSTRG.2395.2	GO:0004044(amidophosphoribosyltransferase activity);GO:0006189('de novo' IMP biosynthetic process);GO:0009113(purine nucleobase biosynthetic process);GO:0009116(nucleoside metabolic process)	00230(Purine metabolism);00250(Alanine, aspartate and glutamate metabolism)	K00764	EC:2.4.2.14	amidophosphoribosyltransferase-like	5.91661	12.1102	12.5881	18.9973	17.2478	15.16	0.595563	-0.747673	0.0232885	1	down	no
LOC105392204	LOC105392204	XM_011563799.1	NA	NA	NA	NA	uncharacterized LOC105392204	2.71735	1.553	1.29512	1.33462	0.942931	0.75284	1.83655	0.876997	0.0233777	1	up	no
MSTRG.1587	LOC105395722	XM_011567684.1	GO:0042438(melanin biosynthetic process);GO:0048067(cuticle pigmentation)	NA	K22203	EC:5.3.3.12	major royal jelly protein 1-like	4.07313	3.66775	3.02737	2.13901	3.26357	1.55397	1.54793	0.630341	0.0235701	1	up	no
MSTRG.16085	LOC105397722	XM_011569741.1	NA	NA	NA	NA	uncharacterized LOC105397722	7.71737	30.7119	5.24509	7.11235	6.83419	6.29828	2.15731	1.10924	0.0236567	1	up	yes
LOC105391379	LOC105391379	XM_011562846.1	NA	NA	NA	NA	uncharacterized LOC105391379	0.252139	0.570273	0.149425	0.88965	0.603093	0.917765	0.403167	-1.31055	0.023728	1	down	yes
LOC105397577	LOC105397577	XM_011569599.1	GO:0004185(serine-type carboxypeptidase activity);GO:0006508(proteolysis);GO:0008239(dipeptidyl-peptidase activity)	04614(Renin-angiotensin system);04974(Protein digestion and absorption)	NA	NA	lysosomal Pro-X carboxypeptidase-like	0.640821	0.870366	0.681562	1.51159	1.62454	1.1209	0.515089	-0.957106	0.0238782	1	down	no
MSTRG.9229	LOC105388062	XM_011558902.1	GO:0003333(amino acid transmembrane transport);GO:0015171(amino acid transmembrane transporter activity)	NA	NA	NA	proton-coupled amino acid transporter 2-like	14.0324	10.6053	11.8619	10.1461	7.17759	7.30878	1.48177	0.567323	0.0240048	1	up	no
LOC105384295	LOC105384295	XM_011554507.1	GO:0004653(polypeptide N-acetylgalactosaminyltransferase activity);GO:0005795(Golgi stack);GO:0009312(oligosaccharide biosynthetic process)	00512(Mucin type O-glycan biosynthesis)	K00710	EC:2.4.1.41	polypeptide N-acetylgalactosaminyltransferase 1-like	0.735256	0	0.622344	0.158635	0.057074	0	6.29366	2.6539	0.0241826	1	up	yes
MSTRG.6	ND3	ND3	NA	NA	NA	NA	NADH dehydrogenase subunit 3	375.393	409.198	556.062	291.665	225.818	377.661	1.4977	0.582744	0.0242166	1	up	no
MSTRG.13961	LOC105393941	XM_011565770.1;MSTRG.13961.3;MSTRG.13961.2	GO:0000932(cytoplasmic mRNA processing body);GO:0005634(nucleus);GO:0005737(cytoplasm);GO:0019233(sensory perception of pain)	NA	NA	NA	uncharacterized LOC105393941	9.72649	1.05681	1.17578	1.79798	1.911	0.456439	2.87104	1.52157	0.024345	1	up	yes
LOC105394139	LOC105394139	XM_011565978.1	NA	NA	NA	NA	uncharacterized LOC105394139	4.80451	2.445	2.6244	2.14982	0.868281	1.86562	2.0218	1.01564	0.0244751	1	up	yes
MSTRG.16017	LOC105397567	XM_011569589.1	NA	NA	NA	NA	ATPase inhibitor mai-1%2C mitochondrial-like	5.29103	3.19828	1.92661	1.70583	0.979221	2.07292	2.18915	1.13037	0.0245837	1	up	yes
MSTRG.9276	LOC105388116	XM_011558967.1;XM_011558968.1	GO:0005576(extracellular region);GO:0005616(larval serum protein complex);GO:0005811(lipid particle);GO:0045735(nutrient reservoir activity);GO:0045735(nutrient reservoir activity)	00350(Tyrosine metabolism);00740(Riboflavin metabolism);00740(Riboflavin metabolism)	K00505	EC:1.14.18.1	arylphorin subunit alpha-like%2C transcript variant X1	0.196952	0.377015	0.508222	0.138609	0.167261	0.204826	2.11905	1.08342	0.0245891	1	up	yes
MSTRG.5553	LOC105383582	MSTRG.5553.1	NA	NA	NA	NA		4.46373	7.17567	14.4099	3.53876	5.59894	4.56166	1.9015	0.927136	0.0247472	1	up	no
MSTRG.6142	LOC105384339	MSTRG.6142.3;XM_011554559.1;MSTRG.6142.2	GO:0004839(ubiquitin activating enzyme activity);GO:0004842(ubiquitin-protein transferase activity);GO:0005634(nucleus);GO:0005829(cytosol);GO:0019941(modification-dependent protein catabolic process)	04120(Ubiquitin mediated proteolysis)	K03178	EC:6.2.1.45	ubiquitin-like modifier-activating enzyme 1	40.3006	17.5084	10.3859	13.404	14.636	11.0346	1.74525	0.803433	0.0248509	1	up	no
MSTRG.5007	LOC105382872	XM_011552839.1;XM_011552840.1	GO:0003674(molecular_function);GO:0005575(cellular_component);GO:0008150(biological_process);GO:0008150(biological_process)	04141(Protein processing in endoplasmic reticulum);04120(Ubiquitin mediated proteolysis);04120(Ubiquitin mediated proteolysis)	NA	NA	tetratricopeptide repeat protein 12-like%2C transcript variant X2	2.49879	1.34175	1.50206	1.31154	0.645648	0.812917	1.92867	0.947605	0.0248631	1	up	no
MSTRG.14039	LOC105394052	XM_011565891.1	NA	NA	NA	NA	uncharacterized LOC105394052	3.46798	5.08525	2.56988	6.46026	7.46399	5.91382	0.560695	-0.834712	0.0249278	1	down	no
MSTRG.4352	LOC105382105	MSTRG.4352.1	NA	NA	NA	NA		24.3941	11.4822	12.0682	7.63955	4.1832	12.4821	1.97263	0.980119	0.0250823	1	up	no
MSTRG.12681	LOC105392416	XM_011564032.1	GO:0030246(carbohydrate binding)	NA	NA	NA	uncharacterized LOC105392416	54.9715	45.1662	85.6176	120.288	110.17	72.5438	0.613051	-0.705921	0.025172	1	down	no
MSTRG.6398	LOC105384632	XM_011554902.1	NA	00770(Pantothenate and CoA biosynthesis)	K08069	EC:3.5.1.92	uncharacterized LOC105384632	3.9176	5.88981	3.33972	6.88739	8.08076	7.46952	0.58594	-0.771175	0.0257183	1	down	no
MSTRG.11438	LOC105390933	XM_011562312.1	GO:0004252(serine-type endopeptidase activity);GO:0006508(proteolysis);GO:0008236(serine-type peptidase activity);GO:0009620(response to fungus);GO:0048812(neuron projection morphogenesis)	00230(Purine metabolism)	NA	NA	venom protease-like	0.320035	0.592716	0.172789	1.32326	0.900965	0.488999	0.400093	-1.32159	0.0259252	1	down	yes
MSTRG.14041	LOC105394053	XM_011565893.1	GO:0005615(extracellular space);GO:0042302(structural constituent of cuticle)	NA	NA	NA	protein argonaute-2-like	11.6323	16.3199	12.4221	20.9924	30.6043	14.6674	0.609295	-0.714788	0.025935	1	down	no
MSTRG.15868	LOC105397287	MSTRG.15868.1;XM_011569304.1;MSTRG.15868.3;MSTRG.15868.4	GO:0006069(ethanol oxidation);GO:0008270(zinc ion binding);GO:0016491(oxidoreductase activity);GO:0046872(metal ion binding);GO:0051903(S-(hydroxymethyl)glutathione dehydrogenase activity);GO:0055114(oxidation-reduction process)	01200(Carbon metabolism);00010(Glycolysis / Gluconeogenesis);00071(Fatty acid degradation);00350(Tyrosine metabolism);00830(Retinol metabolism);00980(Metabolism of xenobiotics by cytochrome P450);00982(Drug metabolism - cytochrome P450)	K00121	EC:1.1.1.284;EC:1.1.1.1	alcohol dehydrogenase class-3-like	2.93011	25.4886	2.63047	26.4293	26.0573	30.9779	0.372004	-1.42661	0.0259838	1	down	yes
LOC105396474	LOC105396474	XM_011568478.1	GO:0005516(calmodulin binding);GO:0005886(plasma membrane);GO:0016286(small conductance calcium-activated potassium channel activity);GO:0043025(neuronal cell body)	04911(Insulin secretion);04976(Bile secretion);04726(Serotonergic synapse)	NA	NA	small conductance calcium-activated potassium channel protein	0.795228	0.680217	1.19834	0.295169	0.671489	0.369424	2.00121	1.00087	0.0260833	1	up	yes
MSTRG.7897		MSTRG.7897.1	NA	NA	NA	NA		10.1006	3.87228	6.36786	3.37139	4.33169	4.08622	1.72536	0.786896	0.0260976	1	up	no
MSTRG.1286	LOC105392675	XM_011564347.1	GO:0003015(heart process);GO:0004888(transmembrane signaling receptor activity);GO:0005886(plasma membrane);GO:0005887(integral component of plasma membrane);GO:0005918(septate junction);GO:0005919(pleated septate junction);GO:0007163(establishment or maintenance of cell polarity);GO:0007391(dorsal closure);GO:0008039(synaptic target recognition);GO:0008065(establishment of blood-nerve barrier);G…	04514(Cell adhesion molecules (CAMs))	K07380	NA	neurexin-4-like	0.250679	0.490892	0.404009	0.819569	0.64589	1.11473	0.44399	-1.1714	0.0261153	1	down	yes
MSTRG.5191	LOC105383111	XM_011553124.1;XM_011553123.1	GO:0005044(scavenger receptor activity);GO:0005811(lipid particle);GO:0005887(integral component of plasma membrane);GO:0006952(defense response);GO:0016020(membrane);GO:0016020(membrane)	04145(Phagosome);04145(Phagosome)	K13885	NA	scavenger receptor class B member 1-like%2C transcript variant X1	0.237559	0.320241	0.309921	0.904995	0.226838	0.961862	0.414445	-1.27075	0.0264462	1	down	yes
MSTRG.11311		MSTRG.11311.1	NA	NA	NA	NA		7.26842	7.38806	9.92518	26.5976	9.85487	9.41889	0.535883	-0.900011	0.0266332	1	down	no
LOC105390209	LOC105390209	XM_011561476.1	GO:0008142(oxysterol binding)	NA	NA	NA	oxysterol-binding protein-related protein 1	0.254215	0.101338	0.305134	0.602614	0.644124	0.38782	0.404199	-1.30686	0.0266999	1	down	yes
MSTRG.16088	LOC105397746	XM_011569764.1	GO:0000902(cell morphogenesis);GO:0004871(signal transducer activity);GO:0005515(protein binding);GO:0006909(phagocytosis);GO:0007030(Golgi organization);GO:0007155(cell adhesion);GO:0007528(neuromuscular junction development);GO:0008360(regulation of cell shape);GO:0016203(muscle attachment);GO:0021955(central nervous system neuron axonogenesis);GO:0022416(chaeta development);GO:0030031(cell pro…	04810(Regulation of actin cytoskeleton)	K05751	NA	abl interactor 2-like	2.14099	2.59626	2.22188	3.75723	4.77978	4.94541	0.516163	-0.9541	0.0271398	1	down	no
MSTRG.2321	LOC105398561	MSTRG.2321.1;XR_961223.1	GO:0000978(RNA polymerase II core promoter proximal region sequence-specific DNA binding);GO:0004879(RNA polymerase II transcription factor activity, ligand-activated sequence-specific DNA binding);GO:0005634(nucleus);GO:0005667(transcription factor complex);GO:0030518(intracellular steroid hormone receptor signaling pathway)	NA	NA	NA	uncharacterized LOC105398561	1.67034	3.55465	1.91706	4.2854	6.42893	2.84887	0.526576	-0.925286	0.0271625	1	down	no
MSTRG.12594	LOC105392315	XM_011563919.1	NA	NA	NA	NA	uncharacterized LOC105392315	263.449	382.767	144.903	136.608	231.72	137.433	1.56422	0.645439	0.0274487	1	up	no
LOC105398337	LOC105398337	XM_011570414.1;XM_011570411.1	GO:0004177(aminopeptidase activity);GO:0006508(proteolysis);GO:0008235(metalloexopeptidase activity);GO:0008235(metalloexopeptidase activity)	NA	NA	NA	methionine aminopeptidase 1D%2C mitochondrial-like%2C transcript variant X1	2.21097	2.0354	1.93153	2.93216	3.62889	3.41707	0.619145	-0.691651	0.0275758	1	down	no
MSTRG.15038	LOC105395506	XM_011567460.1	NA	NA	NA	NA	uncharacterized LOC105395506	5.09671	10.3567	4.2342	14.1908	14.666	7.44471	0.542337	-0.882739	0.0277647	1	down	no
MSTRG.8850	LOC105387574	XM_011558321.1;XM_011558320.1	GO:0008340(determination of adult lifespan);GO:0009267(cellular response to starvation);GO:0017174(glycine N-methyltransferase activity);GO:0033353(S-adenosylmethionine cycle);GO:0050843(S-adenosylmethionine catabolic process);GO:0070328(triglyceride homeostasis);GO:1901054(sarcosine biosynthetic process);GO:1901054(sarcosine biosynthetic process)	00260(Glycine, serine and threonine metabolism);00260(Glycine, serine and threonine metabolism)	K00552	EC:2.1.1.20	glycine N-methyltransferase%2C transcript variant X1	35.0565	59.4599	57.5912	98.4681	72.4299	67.3998	0.638309	-0.647674	0.0277738	1	down	no
LOC105391312	LOC105391312	LOC105391312	NA	NA	NA	NA		3.61196	4.26774	4.72023	2.18525	2.29778	2.89566	1.70761	0.771979	0.027882	1	up	no
MSTRG.7747	LOC105386276	MSTRG.7747.1	NA	NA	NA	NA		9.36304	5.16836	8.12343	5.49107	5.59763	3.5606	1.54648	0.628988	0.0279789	1	up	no
MSTRG.5588		MSTRG.5588.1	NA	NA	NA	NA		4.1539	3.88172	3.75647	1.52351	1.77429	2.45296	2.05053	1.03599	0.0280087	1	up	yes
LOC105389960	LOC105389960	XM_011561171.1;XM_011561170.1	GO:0005783(endoplasmic reticulum);GO:0007595(lactation);GO:0008610(lipid biosynthetic process);GO:0019432(triglyceride biosynthetic process);GO:0019432(triglyceride biosynthetic process)	00561(Glycerolipid metabolism);00564(Glycerophospholipid metabolism);00564(Glycerophospholipid metabolism)	K13506	EC:2.3.1.15	glycerol-3-phosphate acyltransferase 4%2C transcript variant X2	0.36033	0.678255	0.430942	0.78786	0.828046	1.38975	0.488921	-1.03233	0.0281113	1	down	yes
MSTRG.2094	LOC105398278	XM_011570350.1	NA	NA	NA	NA	uncharacterized LOC105398278	2.1516	2.24907	2.29806	1.42919	0.65802	1.29358	1.98141	0.98653	0.0281504	1	up	no
MSTRG.7048	LOC105385442	XM_011555824.1;XM_011555825.1	GO:0005201(extracellular matrix structural constituent);GO:0005576(extracellular region);GO:0006030(chitin metabolic process);GO:0008061(chitin binding);GO:0031012(extracellular matrix);GO:0031012(extracellular matrix)	NA	K00665	EC:2.3.1.85	flocculation protein FLO11%2C transcript variant X1	1.70221	2.81451	2.30684	1.17067	1.05645	1.97901	1.62229	0.698034	0.0282881	1	up	no
MSTRG.1186		MSTRG.1186.1	NA	NA	NA	NA		22.1705	21.2275	16.5293	30.0785	34.8305	28.192	0.643681	-0.635582	0.0284041	1	down	no
MSTRG.15134		MSTRG.15134.1	NA	NA	NA	NA		12.4105	12.8453	15.2155	11.2314	8.32776	7.53726	1.4936	0.578798	0.0284662	1	up	no
LOC105388498	LOC105388498	XM_011559422.1	NA	04142(Lysosome)	K10848	EC:3.1.-.-	uncharacterized LOC105388498	0.799694	0.804866	1.60082	0.683718	0.741338	0.51692	1.65057	0.722968	0.0286109	1	up	no
MSTRG.6970	LOC105385330	MSTRG.6970.1	NA	NA	NA	NA		0	0	1.112	0.446245	7.76112	1.29207	0.117059	-3.09469	0.0286473	1	down	yes
MSTRG.12750	LOC105392495	XM_011564122.1	NA	NA	NA	NA	uncharacterized LOC105392495	7.93268	8.24566	7.1583	2.92122	7.17565	4.75903	1.57087	0.651561	0.0286732	1	up	no
LOC105398690	LOC105398690	XM_011570851.1	NA	NA	NA	NA	uncharacterized LOC105398690	1.29511	1.38802	0.782851	2.06113	1.83804	2.51515	0.54035	-0.888034	0.0287121	1	down	no
LOC105381217	LOC105381217	XR_960478.1	NA	NA	NA	NA	uncharacterized LOC105381217	2.56798	2.02731	1.71196	1.26961	1.01554	1.37701	1.72227	0.784315	0.0287429	1	up	no
MSTRG.4015	LOC105381671	XM_011551455.1	GO:0005215(transporter activity);GO:0005622(intracellular);GO:0006810(transport);GO:0008431(vitamin E binding)	NA	NA	NA	alpha-tocopherol transfer protein-like	5.53078	9.54026	5.32951	12.6047	9.86123	10.7518	0.614146	-0.703347	0.0289896	1	down	no
MSTRG.5098	LOC105382998	XM_011552993.1	GO:0004568(chitinase activity);GO:0005576(extracellular region);GO:0006032(chitin catabolic process);GO:0008061(chitin binding)	NA	NA	NA	uncharacterized LOC105382998	11.6953	16.5386	16.6981	27.4023	22.7015	18.4799	0.655142	-0.610122	0.0291309	1	down	no
MSTRG.13973	LOC105393957	XM_011565785.1	NA	NA	NA	NA	uncharacterized LOC105393957	12.9376	9.38225	8.7502	8.79372	5.54326	6.26962	1.50777	0.592417	0.0291343	1	up	no
MSTRG.2474	LOC105398742	MSTRG.2474.1	NA	NA	NA	NA		3.54309	3.19215	0.883123	6.92862	5.19123	5.16442	0.440769	-1.18191	0.0291372	1	down	yes
MSTRG.5978	LOC105384123	XM_011554308.1;XM_011554309.1	GO:0004034(aldose 1-epimerase activity);GO:0005576(extracellular region);GO:0019318(hexose metabolic process);GO:0030246(carbohydrate binding);GO:0030246(carbohydrate binding)	00010(Glycolysis / Gluconeogenesis);00052(Galactose metabolism);00052(Galactose metabolism)	K01785	EC:5.1.3.3	aldose 1-epimerase-like%2C transcript variant X2	25.9101	19.9003	13.7273	14.3565	9.10125	15.0911	1.54447	0.627115	0.0291773	1	up	no
LOC105389085	LOC105389085	XM_011560149.1	GO:0003676(nucleic acid binding);GO:0003677(DNA binding);GO:0006310(DNA recombination);GO:0015074(DNA integration)	00562(Inositol phosphate metabolism);04070(Phosphatidylinositol signaling system)	K06642	EC:2.7.11.1	uncharacterized LOC105389085	0.457702	0.455533	0.776342	0.266023	0.388998	0.203408	1.96822	0.976891	0.0292083	1	up	no
MSTRG.5304	LOC105383267	MSTRG.5304.1	NA	NA	NA	NA		0.231547	0.834392	0.621802	0.921159	1.14752	1.89257	0.426063	-1.23086	0.0292198	1	down	yes
MSTRG.10571		MSTRG.10571.1	NA	NA	NA	NA		7.78288	0.632236	1.12731	5.22297	15.3252	8.79192	0.325235	-1.62044	0.0292882	1	down	yes
MSTRG.12560	LOC105392276	MSTRG.12560.1	NA	NA	NA	NA		5.14757	5.92356	4.91695	3.1273	1.90358	3.32296	1.91386	0.936485	0.0293337	1	up	no
MSTRG.13427		MSTRG.13427.1	NA	NA	NA	NA		1.62526	2.64635	2.57994	3.70701	3.57923	5.34677	0.542353	-0.882695	0.029379	1	down	no
LOC105390850	LOC105390850	XR_960912.1	NA	NA	NA	NA	uncharacterized LOC105390850	15.0869	17.9342	29.8731	45.5341	43.6717	25.2623	0.549447	-0.863947	0.029581	1	down	no
MSTRG.10076	LOC105389135	XM_011560209.1;XM_011560210.1;XM_011560207.1;XM_011560208.1	GO:0016579(protein deubiquitination);GO:0036459(thiol-dependent ubiquitinyl hydrolase activity);GO:0004843(thiol-dependent ubiquitin-specific protease activity);GO:0008157(protein phosphatase 1 binding);GO:0016318(ommatidial rotation);GO:0046666(retinal cell programmed cell death);GO:0046667(compound eye retinal cell programmed cell death);GO:0046672(positive regulation of compound eye retinal ce…	NA	NA	NA	uncharacterized LOC105389135%2C transcript variant X3	1.39476	0.879956	1.48749	1.12032	0.71974	0.388324	1.68831	0.755577	0.0297664	1	up	no
MSTRG.13359	LOC105393248	XM_011564983.1	NA	NA	NA	NA	repetitive proline-rich cell wall protein 1-like	54.7818	76.1763	84.9208	39.1367	27.7078	66.0608	1.62431	0.699823	0.0298159	1	up	no
MSTRG.2764	LOC105380263	XM_011549785.1	NA	NA	K19873	EC:2.7.8.-	fukutin-related protein-like	0.751205	1.14793	0.921223	0.630767	0.248161	0.485301	2.06737	1.04779	0.0299197	1	up	yes
MSTRG.5606		MSTRG.5606.1	NA	NA	NA	NA		3.84544	3.22313	1.97162	8.29274	8.59677	3.41075	0.445324	-1.16707	0.0299298	1	down	yes
MSTRG.14810	LOC105395098	XM_011567022.1	GO:0001510(RNA methylation);GO:0003700(transcription factor activity, sequence-specific DNA binding);GO:0005634(nucleus);GO:0016422(mRNA (2'-O-methyladenosine-N6-)-methyltransferase activity)	NA	NA	NA	methyltransferase-like protein 14 homolog	2.03547	3.35582	4.10556	5.73122	5.90553	4.75435	0.579391	-0.787391	0.0299881	1	down	no
MSTRG.2361	LOC105398590	XM_011570726.1	NA	NA	NA	NA	coiled-coil domain-containing protein 113-like	3.53359	2.76645	2.6873	2.16386	0.967202	2.1919	1.68841	0.755664	0.0300314	1	up	no
MSTRG.5228	LOC105383136	XM_011553152.1	GO:0002181(cytoplasmic translation);GO:0003735(structural constituent of ribosome);GO:0022625(cytosolic large ribosomal subunit)	03010(Ribosome)	K02905	NA	60S ribosomal protein L29-1-like	1617.09	1016.15	1377.48	937.13	874.538	1040.94	1.40598	0.49158	0.030188	1	up	no
MSTRG.15635	LOC105396641	XM_011568645.1	NA	NA	NA	NA	liver carboxylesterase-like	2.00519	3.86441	2.0115	5.85517	6.01642	2.86582	0.534768	-0.903014	0.030195	1	down	no
MSTRG.9818	LOC105388804	XM_011559784.1	NA	NA	NA	NA	uncharacterized LOC105388804	3.40335	2.87787	2.38857	2.28214	0.834	1.50594	1.87574	0.907456	0.0303313	1	up	no
MSTRG.1440	LOC105393879	XM_011565703.1;MSTRG.1440.1;MSTRG.1440.2	GO:0005778(peroxisomal membrane);GO:0007005(mitochondrion organization);GO:0090141(positive regulation of mitochondrial fission)	NA	K17969	NA	mitochondrial fission 1 protein-like	11.8232	11.593	25.3635	11.4015	10.6143	9.71419	1.53734	0.620435	0.03036	1	up	no
MSTRG.650	LOC105384756	MSTRG.650.1	NA	NA	NA	NA		1.68544	2.75805	1.01077	2.77827	5.2908	4.61151	0.430126	-1.21717	0.0304067	1	down	yes
MSTRG.839	LOC105387085	MSTRG.839.1	NA	NA	NA	NA		2.62731	3.28689	3.16145	6.34184	6.1439	5.09258	0.516298	-0.953724	0.0306147	1	down	no
MSTRG.4358	LOC105382146	MSTRG.4358.2;XM_011551985.1	GO:0004672(protein kinase activity);GO:0004713(protein tyrosine kinase activity);GO:0004714(transmembrane receptor protein tyrosine kinase activity);GO:0005509(calcium ion binding);GO:0005524(ATP binding);GO:0005887(integral component of plasma membrane);GO:0006468(protein phosphorylation);GO:0007030(Golgi organization);GO:0007156(homophilic cell adhesion via plasma membrane adhesion molecules);G…	04144(Endocytosis)	NA	NA	macrophage colony-stimulating factor 1 receptor 2-like	1.65858	1.89393	2.65721	3.51842	4.12748	2.51111	0.611373	-0.709876	0.0306492	1	down	no
MSTRG.8692	LOC105387415	XM_011558126.1	GO:0002121(inter-male aggressive behavior);GO:0005654(nucleoplasm);GO:0008586(imaginal disc-derived wing vein morphogenesis);GO:0016363(nuclear matrix)	NA	NA	NA	uncharacterized LOC105387415	0.817928	1.19127	0.845581	1.9028	1.75716	1.31388	0.573959	-0.80098	0.0307172	1	down	no
MSTRG.41	LOC105391760	XM_011563337.1	NA	NA	NA	NA	uncharacterized LOC105391760	13.7064	12.1867	9.99891	11.4291	6.48891	3.88921	1.64587	0.718854	0.0311663	1	up	no
MSTRG.10464		MSTRG.10464.1	NA	NA	NA	NA		2.43575	2.26544	2.11041	4.8348	4.16026	3.1987	0.558613	-0.840078	0.0312066	1	down	no
MSTRG.8714		MSTRG.8714.1	NA	NA	NA	NA		6.11592	3.43984	4.41426	3.73537	2.38895	2.76997	1.57067	0.651383	0.0312454	1	up	no
LOC105380279	LOC105380279	XM_011549801.1	NA	04630(Jak-STAT signaling pathway)	NA	NA	cytokine receptor-like	0.268203	0.528165	0.486915	0.912483	0.803172	0.72828	0.525089	-0.929367	0.0313875	1	down	no
MSTRG.13071	LOC105392899	XM_011564587.1	GO:0005576(extracellular region);GO:0005615(extracellular space);GO:0007552(metamorphosis);GO:0009617(response to bacterium)	NA	NA	NA	ejaculatory bulb-specific protein 3-like	17.6925	38.057	40.0117	72.6397	38.9797	54.2364	0.577376	-0.792417	0.0314617	1	down	no
MSTRG.7674	LOC105386159	XM_011556663.1	GO:0005201(extracellular matrix structural constituent);GO:0005587(collagen type IV trimer);GO:0005605(basal lamina);GO:0007528(neuromuscular junction development);GO:0031594(neuromuscular junction)	04512(ECM-receptor interaction);04933(AGE-RAGE signaling pathway in diabetic complications)	K06237	NA	collagen alpha-1(IV) chain	55.892	67.8007	61.7871	97.1071	98.5327	73.2382	0.689829	-0.53569	0.0319461	1	down	no
LOC105395623	LOC105395623	XM_011567580.1	GO:0003674(molecular_function);GO:0005856(cytoskeleton);GO:0005886(plasma membrane);GO:0030178(negative regulation of Wnt signaling pathway);GO:0070201(regulation of establishment of protein localization)	NA	NA	NA	putative FERM domain-containing protein FRMD8P1	0.639059	0.508602	0.951394	0.556164	0.138739	0.23939	2.24668	1.16779	0.0320022	1	up	yes
MSTRG.8988	LOC105387745	XM_011558527.1	NA	NA	NA	NA	uncharacterized LOC105387745	15.285	11.035	5.61439	6.23707	4.05079	7.76681	1.76876	0.822738	0.0320808	1	up	no
LOC105395488	LOC105395488	XM_011567442.1	NA	03010(Ribosome)	K10848	EC:3.1.-.-	uncharacterized LOC105395488	0.143584	0.185723	0.134544	0.25486	0.362969	0.26125	0.527656	-0.922331	0.0322092	1	down	no
LOC105390198	LOC105390198	XM_011561459.1	GO:0004497(monooxygenase activity);GO:0005506(iron ion binding);GO:0016020(membrane);GO:0016021(integral component of membrane);GO:0016491(oxidoreductase activity);GO:0016705(oxidoreductase activity, acting on paired donors, with incorporation or reduction of molecular oxygen);GO:0020037(heme binding);GO:0046872(metal ion binding);GO:0055114(oxidation-reduction process)	00140(Steroid hormone biosynthesis);00591(Linoleic acid metabolism);00830(Retinol metabolism);05204(Chemical carcinogenesis)	NA	NA	cytochrome P450 4c21-like	0.07196	0.535441	0.192214	0.63866	0.297237	1.33345	0.352355	-1.5049	0.0323055	1	down	yes
MSTRG.5697	LOC105383777;LOC105383778	MSTRG.5697.1;XM_011553880.1;XM_011553879.1	GO:0005623(cell);GO:0001894(tissue homeostasis);GO:0003989(acetyl-CoA carboxylase activity);GO:0004075(biotin carboxylase activity);GO:0005524(ATP binding);GO:0005730(nucleolus);GO:0005739(mitochondrion);GO:0005829(cytosol);GO:0006084(acetyl-CoA metabolic process);GO:0006633(fatty acid biosynthetic process);GO:0015629(actin cytoskeleton);GO:0044268(multicellular organismal protein metabolic proce…	01212(Fatty acid metabolism);00620(Pyruvate metabolism);00640(Propanoate metabolism);00061(Fatty acid biosynthesis);00254(Aflatoxin);00254(Aflatoxin)	K11262	EC:6.4.1.2;EC:6.3.4.14	acetyl-CoA carboxylase-like;acetyl-CoA carboxylase 1-like	0.972872	1.38758	1.42969	2.04254	1.91541	2.38391	0.597639	-0.742653	0.0323847	1	down	no
LOC105389875	LOC105389875	XM_011561070.1	GO:0000086(G2/M transition of mitotic cell cycle);GO:0000087(mitotic M phase);GO:0000278(mitotic cell cycle);GO:0004725(protein tyrosine phosphatase activity);GO:0004726(non-membrane spanning protein tyrosine phosphatase activity);GO:0005634(nucleus);GO:0005694(chromosome);GO:0006470(protein dephosphorylation);GO:0007030(Golgi organization);GO:0007088(regulation of mitotic nuclear division);GO:00…	04110(Cell cycle);04914(Progesterone-mediated oocyte maturation);05206(MicroRNAs in cancer)	NA	NA	M-phase inducer phosphatase-like	0.221991	0.342231	0.39283	0.441784	0.986284	0.567537	0.47958	-1.06016	0.0326072	1	down	yes
LOC105383440	LOC105383440	XM_011553488.1	GO:0000502(proteasome complex);GO:0004175(endopeptidase activity);GO:0004298(threonine-type endopeptidase activity);GO:0005839(proteasome core complex);GO:0005875(microtubule associated complex);GO:0006511(ubiquitin-dependent protein catabolic process);GO:0006974(cellular response to DNA damage stimulus);GO:0019773(proteasome core complex, alpha-subunit complex);GO:0043161(proteasome-mediated ubi…	03050(Proteasome)	K02731	EC:3.4.25.1	proteasome subunit alpha type-7-1-like	1.90971	1.97893	0.641394	0.542442	0.466752	1.00713	2.24668	1.16779	0.032736	1	up	yes
LOC105390889	LOC105390889	XM_011562264.1	GO:0003674(molecular_function);GO:0005575(cellular_component);GO:0008150(biological_process)	NA	NA	NA	uncharacterized LOC105390889	2.53022	2.0027	2.62045	1.19752	1.74249	1.59726	1.57658	0.656794	0.0329298	1	up	no
MSTRG.9707		MSTRG.9707.1	NA	NA	NA	NA		1.73048	5.86131	5.97401	9.50351	10.6926	6.42303	0.509625	-0.972493	0.0329796	1	down	no
LOC105389732	LOC105389732	XM_011560900.1	NA	NA	NA	NA	uncharacterized LOC105389732	3.1113	2.38816	2.14689	1.73424	1.23343	1.97344	1.54749	0.629933	0.0332161	1	up	no
MSTRG.314	LOC105379994	XM_011549474.1	NA	NA	NA	NA	general odorant-binding protein 56d-like	1604.1	1700.46	949.019	702.287	1467.21	636.646	1.51581	0.600086	0.0332696	1	up	no
LOC105388627	LOC105388627	XM_011559567.1	GO:0005215(transporter activity);GO:0005524(ATP binding);GO:0006810(transport);GO:0006869(lipid transport);GO:0016021(integral component of membrane);GO:0016887(ATPase activity);GO:0042626(ATPase activity, coupled to transmembrane movement of substances);GO:0043231(intracellular membrane-bounded organelle);GO:0055085(transmembrane transport)	02010(ABC transporters)	K05643	NA	ATP-binding cassette sub-family A member 3-like	0.217669	0.29655	0.306796	0.425872	0.606083	0.466507	0.547905	-0.868002	0.0333857	1	down	no
MSTRG.15823	LOC105397213	XR_961151.1	NA	NA	NA	NA	uncharacterized LOC105397213	31.5529	18.9334	21.0729	11.9128	23.8349	8.78893	1.60675	0.684148	0.0334028	1	up	no
MSTRG.5864	LOC105384041	MSTRG.5864.2;XM_011554200.1	GO:0003674(molecular_function);GO:0005575(cellular_component);GO:0008150(biological_process)	NA	NA	NA	uncharacterized LOC105384041	5.34663	6.17715	2.88967	5.96849	14.4456	5.69654	0.552014	-0.857222	0.0335922	1	down	no
MSTRG.11066	LOC105390439	XM_011561744.1	NA	NA	NA	NA	uncharacterized LOC105390439	22.0042	19.0029	15.7904	14.614	16.5713	8.43936	1.43339	0.519431	0.0336356	1	up	no
MSTRG.10254	LOC105389399	XM_011560501.1;MSTRG.10254.2	GO:0005214(structural constituent of chitin-based cuticle);GO:0008010(structural constituent of chitin-based larval cuticle);GO:0031012(extracellular matrix);GO:0040003(chitin-based cuticle development)	00230(Purine metabolism);00240(Pyrimidine metabolism);03020(RNA polymerase)	K03006	EC:2.7.7.6	larval cuticle protein A2B-like	1.08397	3.73771	2.12712	5.04626	1.56461	9.9611	0.419311	-1.25391	0.0337931	1	down	yes
MSTRG.12403	LOC105392083	MSTRG.12403.1	NA	NA	NA	NA		5.41165	3.57934	3.72816	2.55459	2.45656	3.01399	1.58491	0.664404	0.0339958	1	up	no
MSTRG.5768	LOC105383856	XM_011553982.1;XM_011553978.1;MSTRG.5768.8;XM_011553984.1;MSTRG.5768.11;XM_011553985.1;XM_011553979.1;XM_011553986.1;MSTRG.5768.10;MSTRG.5768.14;XM_011553983.1;XM_011553980.1;MSTRG.5768.12;MSTRG.5768.15;XM_011553981.1;MSTRG.5768.13	GO:0008157(protein phosphatase 1 binding);GO:0017137(Rab GTPase binding);GO:0031410(cytoplasmic vesicle);GO:0070062(extracellular exosome);GO:0070062(extracellular exosome)	NA	NA	NA	uncharacterized LOC105383856%2C transcript variant X7	6.69199	19.0067	16.9775	21.2962	29.4642	20.8723	0.595763	-0.747189	0.0346424	1	down	no
MSTRG.7632	LOC105386120	XM_011556617.1	NA	00190(Oxidative phosphorylation)	K02140	NA	ATP synthase subunit g%2C mitochondrial-like	19.2828	13.5501	12.5613	12.3129	6.84179	10.0136	1.55629	0.638106	0.0346789	1	up	no
MSTRG.10471		MSTRG.10471.1	NA	NA	NA	NA		7.602	5.98502	5.6609	5.60976	3.19993	3.93175	1.51065	0.595174	0.0347218	1	up	no
MSTRG.1070	LOC105389224;LOC105389771	XM_011560316.1;XM_011560945.1	GO:0003824(catalytic activity);GO:0005737(cytoplasm);GO:0005829(cytosol);GO:0008360(regulation of cell shape);GO:0008762(UDP-N-acetylmuramate dehydrogenase activity);GO:0009252(peptidoglycan biosynthetic process);GO:0016491(oxidoreductase activity);GO:0016614(oxidoreductase activity, acting on CH-OH group of donors);GO:0050660(flavin adenine dinucleotide binding);GO:0051301(cell division);GO:0055…	NA	NA	NA	uncharacterized LOC105389224;uncharacterized LOC105389771	1.35765	1.36884	1.63092	2.42953	2.53074	1.82578	0.642113	-0.6391	0.034739	1	down	no
MSTRG.8186	LOC105386793	XM_011557424.1	GO:0003674(molecular_function);GO:0005576(extracellular region);GO:0008150(biological_process)	NA	NA	NA	venom allergen 5-like	2.18889	4.137	2.95173	5.73023	3.6488	7.08918	0.563365	-0.827857	0.0347537	1	down	no
MSTRG.2422	LOC105398695	XM_011570855.1	NA	01200(Carbon metabolism);01230(Biosynthesis of amino acids);00260(Glycine, serine and threonine metabolism);00290(Valine, leucine and isoleucine biosynthesis)	K01754	EC:4.3.1.19	uncharacterized LOC105398695	4.11037	3.34715	4.16196	2.53301	1.75257	2.12546	1.81242	0.857918	0.0348853	1	up	no
MSTRG.4937	LOC105382788	XM_011552728.1	NA	01212(Fatty acid metabolism);00062(Fatty acid elongation);01040(Biosynthesis of unsaturated fatty acids)	K10703	EC:4.2.1.134	uncharacterized LOC105382788	9.04248	6.50479	3.49782	3.49903	2.60148	4.7376	1.75723	0.813306	0.0349385	1	up	no
MSTRG.12567	LOC105392277	MSTRG.12567.1	NA	NA	NA	NA		5.13128	5.44576	4.26753	3.76984	3.88125	2.63872	1.44265	0.528718	0.034984	1	up	no
LOC105392535	LOC105392535	XM_011564165.1;XM_011564166.1	NA	NA	NA	NA	uncharacterized LOC105392535%2C transcript variant X1	6.9396	4.97978	4.12502	3.75844	2.74252	3.63356	1.58314	0.662792	0.0350733	1	up	no
LOC105398402	LOC105398402	XM_011570494.1	GO:0009267(cellular response to starvation);GO:0036170(filamentous growth of a population of unicellular organisms in response to starvation);GO:0036180(filamentous growth of a population of unicellular organisms in response to biotic stimulus);GO:0071216(cellular response to biotic stimulus)	02010(ABC transporters);04146(Peroxisome)	K05677	NA	uncharacterized LOC105398402	0.944788	1.24078	0.685601	1.84858	1.65666	1.59222	0.563255	-0.828139	0.0351202	1	down	no
MSTRG.10654	LOC105389914	XR_960871.1	NA	NA	NA	NA	uncharacterized LOC105389914	0.85335	1.20072	1.16624	0.671737	0.518316	0.868311	1.5645	0.6457	0.0351282	1	up	no
MSTRG.14656	LOC105394899	XM_011566820.1	GO:0005575(cellular_component);GO:0016491(oxidoreductase activity);GO:0016614(oxidoreductase activity, acting on CH-OH group of donors);GO:0045455(ecdysteroid metabolic process);GO:0050660(flavin adenine dinucleotide binding);GO:0055114(oxidation-reduction process)	00260(Glycine, serine and threonine metabolism)	NA	NA	glucose dehydrogenase [FAD%2C quinone]-like	0.771847	0.960644	0.58328	0.639518	0.332579	0.162204	2.04158	1.02969	0.0355313	1	up	yes
LOC105395131	LOC105395131	XM_011567062.1	GO:0005391(sodium:potassium-exchanging ATPase activity);GO:0005887(integral component of plasma membrane);GO:0006883(cellular sodium ion homeostasis);GO:0010107(potassium ion import);GO:0015991(ATP hydrolysis coupled proton transport);GO:0030007(cellular potassium ion homeostasis);GO:0036376(sodium ion export from cell);GO:0043231(intracellular membrane-bounded organelle)	04024(cAMP signaling pathway);04022(cGMP - PKG signaling pathway);04911(Insulin secretion);04918(Thyroid hormone synthesis);04919(Thyroid hormone signaling pathway);04260(Cardiac muscle contraction);04261(Adrenergic signaling in cardiomyocytes);04970(Salivary secretion);04971(Gastric acid secretion);04972(Pancreatic secretion);04976(Bile secretion);04973(Carbohydrate digestion and absorption);049…	NA	NA	sodium/potassium-transporting ATPase subunit alpha-2-like	1.94737	1.32395	1.28614	1.17969	0.873905	0.874486	1.55646	0.638271	0.0355993	1	up	no
MSTRG.6016	LOC105384157	XM_011554349.1	NA	NA	NA	NA	uncharacterized LOC105384157	3.65532	2.67596	2.91337	1.96734	2.23533	2.14672	1.45599	0.542003	0.0356589	1	up	no
MSTRG.1145	LOC105390863	XM_011562231.1	GO:0004016(adenylate cyclase activity);GO:0005886(plasma membrane);GO:0006171(cAMP biosynthetic process);GO:0007189(adenylate cyclase-activating G-protein coupled receptor signaling pathway);GO:0007193(adenylate cyclase-inhibiting G-protein coupled receptor signaling pathway);GO:0019933(cAMP-mediated signaling)	00230(Purine metabolism);04213(Longevity regulating pathway - multiple species)	K08049	EC:4.6.1.1	adenylate cyclase type 9	0.462569	0.453351	0.456079	0.800927	1.14513	0.642549	0.530014	-0.915898	0.0358872	1	down	no
MSTRG.15737	LOC105396991	XM_011568999.1;XM_011569000.1	GO:0003674(molecular_function);GO:0005887(integral component of plasma membrane);GO:0008150(biological_process);GO:0008150(biological_process)	NA	NA	NA	uncharacterized LOC105396991%2C transcript variant X2	201.938	213.853	231.828	373.459	446.139	193.252	0.639402	-0.645204	0.0359289	1	down	no
MSTRG.4901		MSTRG.4901.1	NA	NA	NA	NA		4.69191	5.10027	7.19468	3.06695	3.53287	4.23883	1.56725	0.648234	0.0360434	1	up	no
MSTRG.2931	LOC105380397	XM_011549948.1	NA	NA	NA	NA	uncharacterized LOC105380397	9.14166	7.21206	6.22917	5.33637	4.76463	5.11426	1.48423	0.569711	0.0360587	1	up	no
MSTRG.4841	LOC105382663	XM_011552584.1	NA	NA	NA	NA	uncharacterized LOC105382663	7.2002	6.62518	5.39444	5.05693	2.45094	4.21619	1.63935	0.713122	0.0361415	1	up	no
MSTRG.13392	LOC105393284	MSTRG.13392.2;XM_011565017.1	NA	NA	NA	NA	uncharacterized LOC105393284	4.02515	5.61456	2.60301	7.37244	7.02873	5.42322	0.617558	-0.695353	0.0361604	1	down	no
LOC105396515	LOC105396515	XM_011568513.1	GO:0003674(molecular_function);GO:0006351(transcription, DNA-templated);GO:0006355(regulation of transcription, DNA-templated)	NA	K07765	EC:3.4.24.85	PIH1 domain-containing protein 1-like	2.09202	1.73634	1.23079	2.56534	4.10413	2.33291	0.561979	-0.831411	0.0362149	1	down	no
MSTRG.9989	LOC105389028	XM_011560083.1;MSTRG.9989.1	GO:0004568(chitinase activity);GO:0005615(extracellular space);GO:0005975(carbohydrate metabolic process);GO:0006032(chitin catabolic process);GO:0008061(chitin binding);GO:0018990(ecdysis, chitin-based cuticle);GO:0040003(chitin-based cuticle development);GO:0042060(wound healing)	00520(Amino sugar and nucleotide sugar metabolism)	K01183	EC:3.2.1.14	endochitinase	70.8911	59.1061	44.2459	77.769	126.161	66.1243	0.645216	-0.632146	0.0362534	1	down	no
MSTRG.1957	LOC105398123	MSTRG.1957.1	NA	NA	NA	NA		15.5201	12.304	10.1024	42.8036	16.3717	12.728	0.527465	-0.922853	0.0363013	1	down	no
MSTRG.12474		MSTRG.12474.1	NA	NA	NA	NA		8.19211	10.6554	4.11891	15.8291	23.9116	6.09571	0.501052	-0.996968	0.0363652	1	down	no
MSTRG.8683	LOC105387410	XM_011558122.1	NA	NA	NA	NA	MYCBP-associated protein-like	1.48533	1.22378	1.12737	0.837857	0.557999	0.862381	1.69888	0.764586	0.0364365	1	up	no
LOC105393897	LOC105393897	XM_011565721.1	GO:0004674(protein serine/threonine kinase activity);GO:0005634(nucleus);GO:0005737(cytoplasm);GO:0008360(regulation of cell shape);GO:0018105(peptidyl-serine phosphorylation)	03015(mRNA surveillance pathway)	NA	NA	uncharacterized LOC105393897	0.302953	0.217619	0.231804	0.14275	0.163498	0.089616	1.90059	0.926449	0.0364504	1	up	no
LOC105390975	LOC105390975	XM_011562374.1	GO:0004930(G-protein coupled receptor activity)	04620(Toll-like receptor signaling pathway);05168(Herpes simplex infection)	NA	NA	toll-like receptor 13	0.101552	0.194138	0.159795	0.32936	0.310827	0.315244	0.476732	-1.06875	0.0365151	1	down	yes
MSTRG.904	LOC105387520	XM_011558256.1	NA	NA	NA	NA	uncharacterized LOC105387520	3.36764	4.01124	3.51219	5.47636	8.82009	3.73211	0.604101	-0.727137	0.0366332	1	down	no
MSTRG.14154		MSTRG.14154.1	NA	NA	NA	NA		3.47348	2.10785	1.75815	1.56739	1.40898	1.04159	1.82667	0.869218	0.0366571	1	up	no
MSTRG.10663	LOC105389919	XM_011561122.1	GO:0003674(molecular_function);GO:0005575(cellular_component);GO:0008150(biological_process)	NA	NA	NA	uncharacterized LOC105389919	91.6783	98.4251	50.7825	38.5201	83.134	36.5806	1.52233	0.606284	0.036869	1	up	no
MSTRG.3116	LOC105380621	MSTRG.3116.1	NA	NA	NA	NA		3.33898	4.77438	2.12482	5.39085	9.91177	4.17894	0.525532	-0.92815	0.0369104	1	down	no
MSTRG.5886	LOC105384008	XM_011554149.1	NA	NA	NA	NA	uncharacterized LOC105384008	6.23354	7.88847	9.92193	14.2965	13.744	9.87663	0.634119	-0.657173	0.0369152	1	down	no
LOC105390588	LOC105390588	XM_011561915.1	GO:0000381(regulation of alternative mRNA splicing, via spliceosome);GO:0000398(mRNA splicing, via spliceosome);GO:0003676(nucleic acid binding);GO:0003724(RNA helicase activity);GO:0004386(helicase activity);GO:0005524(ATP binding);GO:0005682(U5 snRNP);GO:0030532(small nuclear ribonucleoprotein complex);GO:0034332(adherens junction organization);GO:0051642(centrosome localization)	03040(Spliceosome)	NA	NA	activating signal cointegrator 1 complex subunit 3-like	0.3755	0.71188	0.426856	1.01908	0.997198	0.63256	0.57166	-0.806771	0.0370038	1	down	no
MSTRG.11724	LOC105391271;LOC105391292	XM_011562732.1;MSTRG.11724.3;MSTRG.11724.6;MSTRG.11724.2;MSTRG.11724.8;XM_011562757.1;MSTRG.11724.4;MSTRG.11724.1	NA	NA	NA	NA	cuticle protein 16.5%2C isoform B-like;mucin-19-like	23.937	25.1361	22.3381	13.7888	8.03348	22.7875	1.6008	0.67879	0.0370096	1	up	no
MSTRG.2592		MSTRG.2592.1	NA	NA	NA	NA		7.98964	7.08717	6.98108	2.93601	7.39977	2.00566	1.7873	0.837784	0.0371992	1	up	no
MSTRG.11457	LOC105390941	XM_011562319.1	GO:0005634(nucleus)	NA	NA	NA	uncharacterized LOC105390941	16.6922	7.43541	13.4988	8.0563	7.89654	9.19828	1.49601	0.581124	0.0375553	1	up	no
MSTRG.1432		MSTRG.1432.1	NA	NA	NA	NA		5.9808	8.09649	8.78996	5.10708	5.81022	5.0233	1.43453	0.520578	0.0376049	1	up	no
MSTRG.4182	LOC105381875	XM_011551677.1;XM_011551678.1;XM_011551679.1	GO:0003824(catalytic activity);GO:0005634(nucleus);GO:0005829(cytosol);GO:0005886(plasma membrane);GO:0009789(positive regulation of abscisic acid-activated signaling pathway);GO:0010314(phosphatidylinositol-5-phosphate binding);GO:0030864(cortical actin cytoskeleton);GO:0032266(phosphatidylinositol-3-phosphate binding);GO:0045892(negative regulation of transcription, DNA-templated);GO:0070273(ph…	NA	NA	NA	lanC-like protein 2%2C transcript variant X3	4.8	4.02528	4.0287	3.30069	3.29115	2.21413	1.45969	0.545662	0.0377771	1	up	no
MSTRG.4783	LOC105382593	XM_011552504.1;XM_011552503.1	GO:0004058(aromatic-L-amino-acid decarboxylase activity);GO:0006584(catecholamine metabolic process);GO:0006585(dopamine biosynthetic process from tyrosine);GO:0006587(serotonin biosynthetic process from tryptophan);GO:0007611(learning or memory);GO:0007615(anesthesia-resistant memory);GO:0007616(long-term memory);GO:0007619(courtship behavior);GO:0008062(eclosion rhythm);GO:0009611(response to w…	00340(Histidine metabolism);00350(Tyrosine metabolism);00360(Phenylalanine metabolism);00380(Tryptophan metabolism);00380(Tryptophan metabolism)	K01593	EC:4.1.1.28;EC:4.1.1.105	aromatic-L-amino-acid decarboxylase%2C transcript variant X2	2.70504	5.08538	5.45807	2.91129	2.29856	3.19278	1.57671	0.656915	0.0379196	1	up	no
MSTRG.7631	LOC105386119	XM_011556612.1;XM_011556613.1;XM_011556615.1;XM_011556616.1	NA	NA	NA	NA	gelsolin-related protein of 125 kDa-like%2C transcript variant X3	11.7233	8.37138	7.34568	5.82119	4.68522	7.53795	1.52072	0.604753	0.0380017	1	up	no
MSTRG.7407	LOC105385836	XM_011556281.1	NA	NA	NA	NA	sporozoite surface protein 2-like	4.91274	5.85453	4.26867	1.84264	4.83557	2.65629	1.61079	0.68777	0.0381298	1	up	no
MSTRG.5692	LOC105383775;LOC105383776;LOC105383760;LOC105383774	MSTRG.5692.4;XM_011553878.1;XM_011553859.1;XM_011553875.1;MSTRG.5692.3;MSTRG.5692.2;XM_011553876.1;MSTRG.5692.6	GO:0000902(cell morphogenesis);GO:0003989(acetyl-CoA carboxylase activity);GO:0004075(biotin carboxylase activity);GO:0005524(ATP binding);GO:0005737(cytoplasm);GO:0005811(lipid particle);GO:0005977(glycogen metabolic process);GO:0006633(fatty acid biosynthetic process);GO:0008593(regulation of Notch signaling pathway);GO:0009744(response to sucrose);GO:0019432(triglyceride biosynthetic process);…	01212(Fatty acid metabolism);00620(Pyruvate metabolism);00640(Propanoate metabolism);00061(Fatty acid biosynthesis);00254(Aflatoxin);00254(Aflatoxin)	K11262	EC:6.4.1.2;EC:6.3.4.14	uncharacterized LOC105383776;acetyl-CoA carboxylase-like;acetyl-CoA carboxylase 1-like	1.44154	2.61923	2.52786	3.51909	2.87822	3.82711	0.644401	-0.63397	0.0381726	1	down	no
MSTRG.10128	LOC105389218	XR_960846.1	NA	NA	NA	NA	uncharacterized LOC105389218	53.1871	26.6445	24.2754	16.3947	33.8217	7.36177	1.8081	0.854474	0.0382276	1	up	no
MSTRG.12940	LOC105392732	MSTRG.12940.1	NA	NA	NA	NA		7.48843	5.16485	6.09063	13.8572	9.46716	8.77434	0.583947	-0.776091	0.0382876	1	down	no
MSTRG.7428	LOC105385906;LOC105385865	XM_011556358.1;XM_011556308.1	GO:0002064(epithelial cell development);GO:0003341(cilium movement);GO:0021591(ventricular system development);GO:0060438(trachea development);GO:0003341(cilium movement)	NA	NA	NA	hydrocephalus-inducing protein homolog	0.34379	0.204801	0.262726	0.134212	0.197934	0.181092	1.58078	0.660638	0.0383584	1	up	no
LOC105389425	LOC105389425	XM_011560527.1	GO:0004497(monooxygenase activity);GO:0005506(iron ion binding);GO:0010430(fatty acid omega-oxidation);GO:0016021(integral component of membrane);GO:0016705(oxidoreductase activity, acting on paired donors, with incorporation or reduction of molecular oxygen);GO:0020037(heme binding)	04726(Serotonergic synapse)	NA	NA	cytochrome P450 4g15-like	0.271947	0.816088	0.669903	0.249067	0.295967	0.291545	2.10134	1.07131	0.0383862	1	up	yes
MSTRG.6585	LOC105384857	MSTRG.6585.1	NA	NA	NA	NA		3.07184	3.68659	3.06577	1.68776	1.33593	2.31129	1.84147	0.880856	0.038642	1	up	no
MSTRG.5335	LOC105383310	LOC105383310	NA	NA	NA	NA		6.44873	6.43092	4.887	4.02989	4.26015	3.98966	1.44683	0.532896	0.0386806	1	up	no
MSTRG.13756	LOC105393722	MSTRG.13756.1	NA	NA	NA	NA		40.4645	73.2285	47.6644	87.2158	50.4918	130.695	0.601177	-0.734138	0.0387191	1	down	no
MSTRG.4080		MSTRG.4080.1;MSTRG.4080.2	NA	NA	NA	NA		15.3584	13.6502	11.0025	9.53137	7.67823	10.2222	1.45857	0.54455	0.0387287	1	up	no
MSTRG.3574	LOC105381171	XM_011550845.1;XM_011550846.1	GO:0004222(metalloendopeptidase activity);GO:0006508(proteolysis);GO:0008237(metallopeptidase activity);GO:0016021(integral component of membrane);GO:0016486(peptide hormone processing);GO:0016486(peptide hormone processing)	04640(Hematopoietic cell lineage);04614(Renin-angiotensin system);04974(Protein digestion and absorption);05010(Alzheimer's disease);05010(Alzheimer's disease)	NA	NA	endothelin-converting enzyme 1%2C transcript variant X2	2.34837	3.54545	3.7637	1.86408	3.11046	1.52987	1.48477	0.570235	0.0388848	1	up	no
MSTRG.12453	LOC105392134	XM_011563731.1	GO:0003948(N4-(beta-N-acetylglucosaminyl)-L-asparaginase activity);GO:0005615(extracellular space);GO:0005764(lysosome);GO:0005783(endoplasmic reticulum);GO:0006508(proteolysis);GO:0006517(protein deglycosylation);GO:0008150(biological_process);GO:0008233(peptidase activity);GO:0043621(protein self-association);GO:0051604(protein maturation);GO:0070062(extracellular exosome)	00511(Other glycan degradation);04142(Lysosome)	K01444	EC:3.5.1.26	N(4)-(Beta-N-acetylglucosaminyl)-L-asparaginase-like	1.90077	1.16573	0.901585	0.813598	0.765172	0.766874	1.69168	0.758456	0.0389947	1	up	no
LOC105381365	LOC105381365	XM_011551072.1	NA	NA	NA	NA	axoneme-associated protein mst101(2)-like	4.30886	3.24789	2.45255	2.6168	1.87059	2.26045	1.48333	0.568842	0.039058	1	up	no
MSTRG.11464	LOC105390945	MSTRG.11464.1	NA	NA	NA	NA		5.82163	3.51606	4.66419	3.10136	2.82576	2.52362	1.65688	0.728471	0.039159	1	up	no
MSTRG.14846		MSTRG.14846.1	NA	NA	NA	NA		3.04679	1.11264	1.37756	2.70985	5.44086	4.18703	0.448784	-1.15591	0.039255	1	down	yes
MSTRG.4804	LOC105382604	MSTRG.4804.1	NA	NA	NA	NA		2.68708	3.4311	1.8665	5.52931	4.64798	3.95125	0.565145	-0.823307	0.0397434	1	down	no
MSTRG.7858	LOC105386383	MSTRG.7858.1	NA	NA	NA	NA		4.57887	0.564753	1.4652	4.40971	6.34101	4.48087	0.433889	-1.2046	0.0397535	1	down	yes
MSTRG.15208	LOC105395719	LOC105395719	NA	NA	NA	NA		9.82049	14.686	10.9308	18.2744	12.3478	24.7924	0.639493	-0.644999	0.0398384	1	down	no
MSTRG.528	LOC105382831	XM_011552786.1	GO:0005575(cellular_component);GO:0009922(fatty acid elongase activity);GO:0016021(integral component of membrane);GO:0030497(fatty acid elongation)	00062(Fatty acid elongation)	K10249	EC:2.3.1.199	elongation of very long chain fatty acids protein 7-like	41.881	57.9395	36.5947	31.5378	41.8021	24.1347	1.3995	0.484907	0.0400164	1	up	no
LOC105392072	LOC105392072	XM_011563663.1	GO:0022008(neurogenesis)	NA	NA	NA	uncharacterized LOC105392072	0.673127	0.678714	0.882468	0.24343	0.274371	0.570831	2.0524	1.03731	0.0403512	1	up	yes
LOC105389931	LOC105389931	XR_960873.1;XR_960874.1	NA	NA	K02213	NA	uncharacterized LOC105389931%2C transcript variant X1	1.14912	1.04577	0.737637	0.467313	0.621699	0.566638	1.77123	0.82475	0.0406269	1	up	no
MSTRG.9402	LOC105388273	MSTRG.9402.1;MSTRG.9402.3	NA	NA	NA	NA		9.81462	6.55722	6.25211	5.961	4.13619	5.1568	1.48315	0.568664	0.040694	1	up	no
LOC105394256	LOC105394256	XM_011566137.1	GO:0005634(nucleus);GO:0005747(mitochondrial respiratory chain complex I);GO:0008137(NADH dehydrogenase (ubiquinone) activity);GO:0021762(substantia nigra development);GO:0030308(negative regulation of cell growth);GO:0043209(myelin sheath);GO:0055114(oxidation-reduction process);GO:0072593(reactive oxygen species metabolic process);GO:2001243(negative regulation of intrinsic apoptotic signaling …	00190(Oxidative phosphorylation)	K03936	EC:1.6.5.3;EC:1.6.99.3	NADH dehydrogenase [ubiquinone] iron-sulfur protein 3%2C mitochondrial-like	2.69857	1.75582	2.7583	1.5144	0.709856	1.72909	1.82445	0.867461	0.0407174	1	up	no
MSTRG.4922	LOC105382746	MSTRG.4922.1	NA	NA	NA	NA		8.93461	5.70668	3.85749	1.46849	2.28664	4.70841	2.1857	1.1281	0.0407314	1	up	yes
MSTRG.14795	LOC105395065	MSTRG.14795.8;MSTRG.14795.2;MSTRG.14795.4;MSTRG.14795.10;MSTRG.14795.7;XM_011566988.1;MSTRG.14795.5;MSTRG.14795.3;MSTRG.14795.9;MSTRG.14795.6	GO:0042302(structural constituent of cuticle);GO:0048085(adult chitin-containing cuticle pigmentation)	04933(AGE-RAGE signaling pathway in diabetic complications)	K06237	NA	nascent polypeptide-associated complex subunit alpha%2C muscle-specific form-like	70.3766	94.7385	45.3848	38.5723	56.5721	51.572	1.43474	0.520789	0.0409695	1	up	no
MSTRG.4369	LOC105382153	XM_011551992.1	GO:0000776(kinetochore);GO:0003729(mRNA binding);GO:0005654(nucleoplasm);GO:0005737(cytoplasm);GO:0005816(spindle pole body);GO:0005819(spindle);GO:0006606(protein import into nucleus);GO:0010564(regulation of cell cycle process);GO:0016973(poly(A)+ mRNA export from nucleus);GO:0030529(intracellular ribonucleoprotein complex);GO:0034398(telomere tethering at nuclear periphery);GO:0034399(nuclear …	NA	NA	NA	protein Spindly-B-like	1.2487	1.88166	1.39301	2.45742	4.32659	1.51851	0.544819	-0.87615	0.040983	1	down	no
MSTRG.8060	LOC105386654	XM_011557263.1	NA	NA	NA	NA	uncharacterized LOC105386654	57.6388	37.284	27.5377	29.4863	18.5945	31.8701	1.5317	0.615133	0.0410503	1	up	no
LOC105396564	LOC105396564	XM_011568561.1	GO:0000166(nucleotide binding);GO:0003729(mRNA binding);GO:0005634(nucleus);GO:0006396(RNA processing);GO:0008098(5S rRNA primary transcript binding);GO:0030529(intracellular ribonucleoprotein complex)	05322(Systemic lupus erythematosus)	K11090	NA	la protein homolog	2.24698	1.39314	1.78462	0.66573	1.60846	0.580366	1.90038	0.926285	0.04151	1	up	no
MSTRG.8608	LOC105387314	MSTRG.8608.1	NA	NA	NA	NA		8.63874	6.31163	6.69532	5.39742	3.59161	5.45691	1.49839	0.583415	0.0416229	1	up	no
MSTRG.9740	LOC105388727	MSTRG.9740.2;XM_011559684.1	GO:0005509(calcium ion binding);GO:0005886(plasma membrane);GO:0005887(integral component of plasma membrane);GO:0007155(cell adhesion);GO:0007156(homophilic cell adhesion via plasma membrane adhesion molecules);GO:0016339(calcium-dependent cell-cell adhesion via plasma membrane cell adhesion molecules);GO:0044331(cell-cell adhesion mediated by cadherin)	04391(Hippo signaling pathway -fly)	NA	NA	cadherin-89D	10.6504	9.21504	11.5677	14.8183	22.523	10.7472	0.653652	-0.613406	0.0419208	1	down	no
MSTRG.13160	LOC105392996	XM_011564689.1	GO:0000290(deadenylation-dependent decapping of nuclear-transcribed mRNA);GO:0000932(cytoplasmic mRNA processing body);GO:0050072(m7G(5')pppN diphosphatase activity)	03018(RNA degradation)	K12613	EC:3.6.1.62	m7GpppN-mRNA hydrolase-like	9.51043	7.83172	9.81306	5.40318	6.73262	6.70892	1.441	0.527069	0.0420202	1	up	no
LOC105391701	LOC105391701	XM_011563227.1	GO:0003779(actin binding);GO:0005829(cytosol);GO:0005886(plasma membrane);GO:0007015(actin filament organization);GO:0007411(axon guidance);GO:0007526(larval somatic muscle development);GO:0008270(zinc ion binding);GO:0016322(neuron remodeling);GO:0019417(sulfur oxidation);GO:0030042(actin filament depolymerization);GO:0043195(terminal bouton);GO:0043914(NADPH:sulfur oxidoreductase activity);GO:0…	00564(Glycerophospholipid metabolism);04070(Phosphatidylinositol signaling system)	NA	NA	protein-methionine sulfoxide oxidase Mical-like	0.161065	0.259446	0.146918	0.321621	0.436903	0.306768	0.532651	-0.908737	0.0421165	1	down	no
MSTRG.1853	LOC105397997	XM_011570038.1	GO:0005506(iron ion binding);GO:0006694(steroid biosynthetic process);GO:0009055(electron carrier activity);GO:0016020(membrane);GO:0016705(oxidoreductase activity, acting on paired donors, with incorporation or reduction of molecular oxygen);GO:0019233(sensory perception of pain);GO:0020037(heme binding);GO:0043231(intracellular membrane-bounded organelle);GO:0055114(oxidation-reduction process)	00071(Fatty acid degradation);00590(Arachidonic acid metabolism);00830(Retinol metabolism);03320(PPAR signaling pathway);04270(Vascular smooth muscle contraction);04750(Inflammatory mediator regulation of TRP channels)	NA	NA	cytochrome P450 4g15%2C transcript variant X1	0.651095	0.528801	0.389703	1.44863	0.426046	1.24869	0.502534	-0.992708	0.0421769	1	down	no
MSTRG.4231		MSTRG.4231.1	NA	NA	NA	NA		5.84764	6.58503	7.53394	9.34281	12.5429	9.48463	0.63648	-0.651812	0.0422207	1	down	no
LOC105393286	LOC105393286	XM_011565023.1;XM_011565028.1	NA	NA	NA	NA	uncharacterized LOC105393286%2C transcript variant X1	9.98793	7.59853	4.57747	6.09795	4.46897	3.56203	1.56869	0.649559	0.0422771	1	up	no
MSTRG.7714	LOC105386218	XM_011556731.1;XM_011556733.1	GO:0005813(centrosome);GO:0005814(centriole);GO:0007020(microtubule nucleation);GO:0007605(sensory perception of sound);GO:0048598(embryonic morphogenesis);GO:0051297(centrosome organization);GO:0060285(cilium-dependent cell motility);GO:0060285(cilium-dependent cell motility)	04530(Tight junction);04260(Cardiac muscle contraction);04261(Adrenergic signaling in cardiomyocytes);04261(Adrenergic signaling in cardiomyocytes)	NA	NA	golgin subfamily B member 1-like%2C transcript variant X2	0.969002	0.83707	0.97252	0.719868	0.706454	0.539357	1.41355	0.499326	0.0426935	1	up	no
MSTRG.4885	LOC105382688	LOC105382688	NA	NA	NA	NA		28.8336	23.0031	24.7118	20.9223	14.9358	18.4726	1.40894	0.494607	0.0427552	1	up	no
MSTRG.13302	LOC105393168	XM_011564903.1	GO:0005576(extracellular region);GO:0007552(metamorphosis);GO:0009615(response to virus);GO:0045297(post-mating behavior)	NA	NA	NA	ejaculatory bulb-specific protein 3-like	0.60761	4.20455	1.16294	5.93531	1.25278	8.38071	0.383787	-1.38162	0.042848	1	down	yes
MSTRG.13271	LOC105393140	XM_011564875.1;MSTRG.13271.2	GO:0003934(GTP cyclohydrolase I activity);GO:0005737(cytoplasm);GO:0006728(pteridine biosynthetic process);GO:0006729(tetrahydrobiopterin biosynthetic process);GO:0008363(larval chitin-based cuticle development);GO:0009880(embryonic pattern specification);GO:0035185(preblastoderm mitotic cell cycle);GO:0043095(regulation of GTP cyclohydrolase I activity);GO:0046654(tetrahydrofolate biosynthetic p…	00790(Folate biosynthesis)	K01495	EC:3.5.4.16	GTP cyclohydrolase 1-like	47.0064	74.692	45.8496	70.3282	70.9548	113.716	0.657054	-0.605917	0.0434988	1	down	no
LOC105386772	LOC105386772	XM_011557400.1	GO:0000166(nucleotide binding);GO:0000943(retrotransposon nucleocapsid);GO:0003676(nucleic acid binding);GO:0003677(DNA binding);GO:0003723(RNA binding);GO:0003824(catalytic activity);GO:0003887(DNA-directed DNA polymerase activity);GO:0003964(RNA-directed DNA polymerase activity);GO:0004190(aspartic-type endopeptidase activity);GO:0004518(nuclease activity);GO:0004519(endonuclease activity);GO:0…	01200(Carbon metabolism);00020(Citrate cycle (TCA cycle));00620(Pyruvate metabolism);00630(Glyoxylate and dicarboxylate metabolism);00270(Cysteine and methionine metabolism)	NA	NA	uncharacterized protein K02A2.6-like	0.143868	0.419992	0.161239	0.469366	0.37459	0.678471	0.476278	-1.07012	0.0436047	1	down	yes
MSTRG.11722	LOC105391272	XM_011562733.1	NA	NA	NA	NA	cuticle protein 16.5%2C isoform B-like	6.38295	7.75031	9.75877	2.12051	3.35603	7.57841	1.83011	0.871932	0.0438688	1	up	no
MSTRG.2005	LOC105398201	XM_011570256.1	NA	04745(Phototransduction - fly)	K10848	EC:3.1.-.-	uncharacterized LOC105398201	2.9411	4.25339	2.76097	6.41013	4.21404	4.54009	0.656508	-0.607116	0.0439492	1	down	no
MSTRG.1344	LOC105392929	MSTRG.1344.2;XM_011564624.1	GO:0016491(oxidoreductase activity);GO:0055114(oxidation-reduction process)	00040(Pentose and glucuronate interconversions);00051(Fructose and mannose metabolism);00052(Galactose metabolism);00561(Glycerolipid metabolism)	K00011	EC:1.1.1.21	aldo-keto reductase AKR2E4-like	5.83809	9.25496	4.58537	10.7172	11.1774	9.02279	0.636484	-0.651804	0.0439997	1	down	no
MSTRG.14792	LOC105395063	XM_011566986.1	NA	NA	NA	NA	prisilkin-39-like	3.98622	16.8653	13.2364	22.25	8.95121	41.3456	0.469875	-1.08965	0.0441955	1	down	yes
MSTRG.9948		MSTRG.9948.1	NA	NA	NA	NA		6.96945	10.2646	5.83005	5.1239	5.69946	4.9197	1.46503	0.550931	0.0443573	1	up	no
MSTRG.15986	LOC105397491	XM_011569517.1	GO:0003674(molecular_function);GO:0005575(cellular_component);GO:0008150(biological_process)	NA	NA	NA	uncharacterized LOC105397491	8.27083	5.22937	4.03612	3.75695	3.30718	4.39303	1.5306	0.614096	0.0443674	1	up	no
MSTRG.7484		MSTRG.7484.1	NA	NA	NA	NA		9.05142	4.53627	7.4477	4.22679	4.83744	4.26144	1.57856	0.65861	0.0445992	1	up	no
LOC105393878	LOC105393878	XM_011565699.1	NA	04530(Tight junction)	NA	NA	uncharacterized LOC105393878	0.063879	0.225444	0.128417	0.328018	0.500475	0.15407	0.425153	-1.23394	0.0449101	1	down	yes
MSTRG.208	LOC105380184	MSTRG.208.1	NA	NA	NA	NA		7.17045	4.77921	4.86974	3.52309	3.80852	3.9899	1.48561	0.571058	0.0449347	1	up	no
MSTRG.3704	LOC105381355	XM_011551062.1	GO:0004252(serine-type endopeptidase activity);GO:0006508(proteolysis)	04080(Neuroactive ligand-receptor interaction);04610(Complement and coagulation cascades);05150(Staphylococcus aureus infection);05164(Influenza A)	NA	NA	serine proteinase stubble-like	0.701588	0.502114	0.040326	1.31922	1.66342	0.479131	0.359361	-1.47649	0.045012	1	down	yes
MSTRG.9802	LOC105388781	XM_011559751.1	GO:0004505(phenylalanine 4-monooxygenase activity);GO:0004510(tryptophan 5-monooxygenase activity);GO:0005506(iron ion binding);GO:0005811(lipid particle);GO:0006559(L-phenylalanine catabolic process);GO:0006726(eye pigment biosynthetic process);GO:0006909(phagocytosis);GO:0007616(long-term memory);GO:0016597(amino acid binding);GO:0055114(oxidation-reduction process)	01230(Biosynthesis of amino acids);00360(Phenylalanine metabolism);00400(Phenylalanine, tyrosine and tryptophan biosynthesis)	K00500	EC:1.14.16.1	protein henna	10.6483	19.4575	15.6105	24.8059	22.0501	21.4755	0.669036	-0.579843	0.0450422	1	down	no
MSTRG.4964	LOC105382852	XM_011552820.1	GO:0004181(metallocarboxypeptidase activity);GO:0004185(serine-type carboxypeptidase activity);GO:0005615(extracellular space);GO:0005794(Golgi apparatus);GO:0030070(insulin processing);GO:0030141(secretory granule);GO:0043025(neuronal cell body);GO:0097060(synaptic membrane)	04940(Type I diabetes mellitus)	NA	NA	carboxypeptidase E-like	3.61973	5.50556	5.86546	8.51163	6.27388	8.81994	0.635054	-0.655048	0.0453469	1	down	no
MSTRG.9063	LOC105387852	XM_011558639.1	GO:0005509(calcium ion binding);GO:0005578(proteinaceous extracellular matrix);GO:0005604(basement membrane);GO:0005615(extracellular space);GO:0007155(cell adhesion);GO:0007165(signal transduction);GO:0007443(Malpighian tubule morphogenesis);GO:0007498(mesoderm development);GO:0007504(larval fat body development);GO:0030536(larval feeding behavior);GO:0060438(trachea development);GO:0061327(ante…	03040(Spliceosome)	K12819	NA	SPARC	116.891	147.188	135.799	213.956	204.255	152.522	0.700638	-0.513258	0.045464	1	down	no
MSTRG.543	LOC105382926	XM_011552915.1;XM_011552924.1	GO:0005215(transporter activity);GO:0005504(fatty acid binding);GO:0005654(nucleoplasm);GO:0005829(cytosol);GO:0005875(microtubule associated complex);GO:0006810(transport);GO:0007616(long-term memory);GO:0007616(long-term memory)	NA	NA	NA	fatty acid-binding protein%2C muscle-like%2C transcript variant X2	23.879	7.55869	10.7313	23.677	32.0739	18.9872	0.564224	-0.825661	0.0455445	1	down	no
MSTRG.8430	LOC105387095	XM_011557771.1	NA	NA	NA	NA	sperm-tail PG-rich repeat-containing protein 2-like	4.5929	3.33667	3.53734	3.21554	2.18802	2.43476	1.46293	0.548859	0.0456734	1	up	no
LOC105391562	LOC105391562	XM_011563051.1	NA	NA	NA	NA	uncharacterized LOC105391562	0.485386	0.827983	0.436083	0.98579	1.2804	1.1118	0.517897	-0.949263	0.0456808	1	down	no
MSTRG.9893		MSTRG.9893.1	NA	NA	NA	NA		6.35234	8.15298	4.97196	1.8289	3.94443	5.43698	1.73744	0.796966	0.0458257	1	up	no
LOC105397606	LOC105397606	XM_011569627.1	GO:0000439(core TFIIH complex);GO:0003690(double-stranded DNA binding);GO:0003700(transcription factor activity, sequence-specific DNA binding);GO:0005675(holo TFIIH complex);GO:0006289(nucleotide-excision repair);GO:0008353(RNA polymerase II carboxy-terminal domain kinase activity);GO:0070816(phosphorylation of RNA polymerase II C-terminal domain)	03022(Basal transcription factors);03420(Nucleotide excision repair)	K03144	NA	general transcription factor IIH subunit 4-like	0.327816	0.307	0.233199	0.47412	0.579581	0.681669	0.50019	-0.999451	0.0458491	1	down	no
MSTRG.6721	LOC105385006	MSTRG.6721.1	NA	NA	NA	NA		4.87467	0.865057	5.87286	9.04081	9.76789	6.75679	0.454229	-1.13851	0.046078	1	down	yes
MSTRG.3656		MSTRG.3656.1	NA	NA	NA	NA		5.65001	5.40586	2.77758	2.05662	3.55624	2.87222	1.63033	0.705161	0.0461398	1	up	no
MSTRG.13017	LOC105392830	XM_011564512.1	GO:0001561(fatty acid alpha-oxidation);GO:0048244(phytanoyl-CoA dioxygenase activity)	04146(Peroxisome)	K00477	EC:1.14.11.18	phytanoyl-CoA dioxygenase%2C peroxisomal-like	1.21704	1.83889	1.53262	3.04654	1.88681	2.87442	0.587691	-0.76687	0.0462401	1	down	no
MSTRG.5826	LOC105383941	MSTRG.5826.1	NA	NA	NA	NA		4.48108	4.41191	5.77672	3.10806	3.99756	2.36497	1.54898	0.631316	0.0462895	1	up	no
MSTRG.9295	LOC105388145	XM_011559005.1	GO:0004518(nuclease activity);GO:0005634(nucleus);GO:0005737(cytoplasm);GO:0016787(hydrolase activity);GO:0042578(phosphoric ester hydrolase activity);GO:0043765(T/G mismatch-specific endonuclease activity);GO:0044824(retroviral 3' processing activity);GO:0046872(metal ion binding)	NA	K03654	EC:3.6.4.12	putative nuclease HARBI1	4.23355	3.48937	3.56728	2.99163	2.65936	2.1118	1.4544	0.540425	0.0463129	1	up	no
LOC105398527	LOC105398527	XM_011570647.1	GO:0005355(glucose transmembrane transporter activity);GO:0016021(integral component of membrane);GO:0055085(transmembrane transport)	05231(Choline metabolism in cancer)	NA	NA	facilitated trehalose transporter Tret1-like	2.20098	1.70573	1.76156	1.4916	1.30452	0.744582	1.60089	0.678872	0.0463465	1	up	no
MSTRG.15116	LOC105395583	XM_011567541.1;XM_011567542.1	NA	NA	NA	NA	uncharacterized LOC105395583%2C transcript variant X1	6.32353	10.5454	7.23707	16.0304	8.04888	14.9616	0.617456	-0.695593	0.0467268	1	down	no
MSTRG.922	LOC105388468	XM_011559381.1	GO:0004674(protein serine/threonine kinase activity);GO:0004702(receptor signaling protein serine/threonine kinase activity);GO:0005524(ATP binding);GO:0006468(protein phosphorylation);GO:0006909(phagocytosis);GO:0008360(regulation of cell shape);GO:0031431(Dbf4-dependent protein kinase complex)	04110(Cell cycle)	NA	NA	cell division cycle 7-related protein kinase-like	5.58047	5.42905	6.84082	8.69827	10.9706	8.01721	0.644741	-0.633209	0.0467691	1	down	no
MSTRG.12231		MSTRG.12231.1	NA	NA	NA	NA		4.16714	2.81115	5.61961	2.81709	0.642884	2.36247	2.16368	1.11349	0.0468799	1	up	yes
MSTRG.4979	LOC105382859	XM_011552828.1	NA	NA	NA	NA	uncharacterized LOC105382859	10.8664	12.8443	10.8966	18.8317	18.6922	13.898	0.673007	-0.571307	0.0470385	1	down	no
MSTRG.12116	LOC105391714	XM_011563247.1	GO:0005524(ATP binding);GO:0005777(peroxisome);GO:0008152(metabolic process);GO:0009698(phenylpropanoid metabolic process);GO:0016207(4-coumarate-CoA ligase activity);GO:0016874(ligase activity)	00360(Phenylalanine metabolism);00130(Ubiquinone and other terpenoid-quinone biosynthesis)	K01904	EC:6.2.1.12	4-coumarate--CoA ligase 1-like	1.5973	2.09056	2.10174	3.18269	2.42827	4.04797	0.599403	-0.738402	0.0473106	1	down	no
LOC105396530	LOC105396530	XM_011568526.1	GO:0003743(translation initiation factor activity);GO:0006412(translation);GO:0006413(translational initiation)	NA	NA	NA	eukaryotic translation initiation factor 4E transporter	0.89722	0.892446	0.577161	1.30498	1.38928	1.32317	0.589141	-0.763315	0.0473194	1	down	no
MSTRG.1899	LOC105398072	MSTRG.1899.1;XM_011570124.1;MSTRG.1899.3	GO:0003974(UDP-N-acetylglucosamine 4-epimerase activity);GO:0003978(UDP-glucose 4-epimerase activity);GO:0006012(galactose metabolic process);GO:0019233(sensory perception of pain);GO:0035167(larval lymph gland hemopoiesis)	00052(Galactose metabolism);00520(Amino sugar and nucleotide sugar metabolism)	K01784	EC:5.1.3.2	UDP-glucose 4-epimerase-like	13.3126	14.655	10.0916	9.51716	9.48826	8.30469	1.39359	0.478807	0.0473347	1	up	no
MSTRG.8899	LOC105387641	XM_011558396.1	NA	NA	NA	NA	SET and MYND domain-containing protein 4-like	9.84448	8.70701	7.15429	16.4773	12.3307	10.0482	0.661561	-0.596054	0.0473399	1	down	no
MSTRG.1105	LOC105390022	XM_011561251.1	GO:0004252(serine-type endopeptidase activity);GO:0005737(cytoplasm)	04080(Neuroactive ligand-receptor interaction)	K01312	EC:3.4.21.4	trypsin%2C alkaline C-like	224.762	207.231	189.616	146.32	177.718	153.682	1.3012	0.379841	0.0473564	1	up	no
MSTRG.12451	LOC105392121	XM_011563717.1	NA	NA	NA	NA	uncharacterized LOC105392121	6.75842	4.88917	4.01039	3.08294	2.62713	4.28016	1.56733	0.648308	0.0475134	1	up	no
MSTRG.526	LOC105382795	XM_011552748.1	NA	NA	NA	NA	UPF0728 protein v1g117062-like	1.16751	0.572076	0.355843	0.400988	0.292081	0.380087	1.95259	0.965387	0.0478242	1	up	no
MSTRG.13007	LOC105392816	XM_011564497.1;XM_011564496.1	NA	NA	NA	NA	uncharacterized LOC105392816%2C transcript variant X1	2.56767	1.31816	1.65749	1.3664	0.544359	1.2478	1.75502	0.811484	0.0478331	1	up	no
MSTRG.15708	LOC105396926	XM_011568938.1	GO:0005737(cytoplasm);GO:0007015(actin filament organization);GO:0014069(postsynaptic density);GO:0015629(actin cytoskeleton);GO:0019722(calcium-mediated signaling);GO:0030425(dendrite);GO:0031175(neuron projection development);GO:0051015(actin filament binding)	04530(Tight junction)	NA	NA	neurabin-1-like	1.70868	2.59244	2.23797	2.86433	4.7905	3.17609	0.603742	-0.727997	0.0478961	1	down	no
MSTRG.10079	LOC105389147	XR_960842.1	NA	NA	NA	NA	uncharacterized LOC105389147	27.1467	27.7261	17.0469	12.4035	19.0312	17.9459	1.45644	0.542443	0.0480308	1	up	no
MSTRG.7673	LOC105386157	XM_011556661.1	GO:0001569(patterning of blood vessels);GO:0005201(extracellular matrix structural constituent);GO:0005587(collagen type IV trimer);GO:0007420(brain development);GO:0007528(neuromuscular junction development);GO:0048407(platelet-derived growth factor binding);GO:0061304(retinal blood vessel morphogenesis);GO:0061333(renal tubule morphogenesis);GO:0071230(cellular response to amino acid stimulus);…	04512(ECM-receptor interaction);04933(AGE-RAGE signaling pathway in diabetic complications)	K06237	NA	collagen alpha-1(IV) chain	99.3231	117.51	104.891	166.653	166.016	122.507	0.706813	-0.5006	0.0481211	1	down	no
MSTRG.2199	LOC105398516;LOC105398514	XM_011570636.1;MSTRG.2199.2;XM_011570633.1;MSTRG.2199.1	NA	NA	NA	NA	cuticle protein 16.5%2C isoform B-like	8.39803	5.62878	6.57738	1.99459	0.946977	6.85369	2.10349	1.07278	0.0481854	1	up	yes
LOC105381850	LOC105381850	XM_011551652.1	NA	NA	NA	NA	uncharacterized LOC105381850	0.411178	0.79232	1.44858	1.62589	1.13004	2.58218	0.496819	-1.00921	0.048195	1	down	yes
MSTRG.908	LOC105387569	XM_011558317.1	NA	NA	NA	NA	putative nuclease HARBI1	2.82613	1.68889	2.28402	1.36686	1.89397	1.15552	1.53951	0.622475	0.0483765	1	up	no
MSTRG.3560	LOC105381161	XM_011550824.1	GO:0016491(oxidoreductase activity);GO:0055114(oxidation-reduction process)	00590(Arachidonic acid metabolism);00980(Metabolism of xenobiotics by cytochrome P450)	K00079	EC:1.1.1.184;EC:1.1.1.189	carbonyl reductase [NADPH] 1-like	3.20239	5.56621	3.84562	2.61575	2.79354	2.915	1.51535	0.599653	0.0486095	1	up	no
LOC105388573	LOC105388573	XM_011559514.1	NA	NA	K10843	EC:3.6.4.12	uncharacterized LOC105388573	1.42108	2.23966	2.62611	3.84271	3.42732	3.36722	0.591022	-0.758715	0.048635	1	down	no
MSTRG.3602	LOC105381211	XM_011550897.1	NA	NA	NA	NA	craniofacial development protein 2-like	1.05013	2.03495	1.65649	1.82419	3.67683	2.99837	0.557871	-0.841996	0.048681	1	down	no
MSTRG.3799		MSTRG.3799.1	NA	NA	NA	NA		2.41233	4.74189	2.68156	7.21705	2.90173	8.68961	0.522946	-0.935266	0.048812	1	down	no
LOC105384947	LOC105384947	XM_011555244.1	GO:0001745(compound eye morphogenesis);GO:0001763(morphogenesis of a branching structure);GO:0004672(protein kinase activity);GO:0004702(receptor signaling protein serine/threonine kinase activity);GO:0005025(transforming growth factor beta receptor activity, type I);GO:0005515(protein binding);GO:0005524(ATP binding);GO:0005769(early endosome);GO:0005771(multivesicular body);GO:0005829(cytosol);…	04350(TGF-beta signaling pathway)	K13578	EC:2.7.11.30	bone morphogenetic protein receptor type-1B-like	1.92369	0.356315	1.37447	3.57382	3.75201	1.67922	0.405825	-1.30107	0.0488151	1	down	yes
MSTRG.14319	LOC105394404	XM_011566297.1	NA	NA	NA	NA	uncharacterized LOC105394404	2.82136	3.06209	3.75433	1.99242	1.02405	2.12723	1.87371	0.905895	0.0489231	1	up	no
MSTRG.13059	LOC105392882	XM_011564568.1	GO:0003674(molecular_function);GO:0005575(cellular_component);GO:0008150(biological_process)	NA	NA	NA	uncharacterized LOC105392882	53.9435	59.5639	30.9917	17.7208	53.4924	19.9901	1.58436	0.663902	0.0489843	1	up	no
MSTRG.8550	LOC105387237	XM_011557938.1	GO:0005750(mitochondrial respiratory chain complex III);GO:0006122(mitochondrial electron transport, ubiquinol to cytochrome c);GO:0008121(ubiquinol-cytochrome-c reductase activity)	00190(Oxidative phosphorylation)	K00416	NA	cytochrome b-c1 complex subunit 6%2C mitochondrial-like	6.57675	4.70568	6.757	4.03127	1.87995	4.46657	1.73827	0.797655	0.0493075	1	up	no
MSTRG.4445	LOC105382220	XM_011552069.1	NA	NA	NA	NA	uncharacterized LOC105382220	22.5247	43.3713	22.8533	9.2279	33.19	8.8664	1.73054	0.79122	0.0493402	1	up	no
MSTRG.1893		MSTRG.1893.1	NA	NA	NA	NA		3.37117	2.94639	1.91676	1.00702	0.976807	2.13698	1.99823	0.998724	0.0493589	1	up	no
MSTRG.10623		MSTRG.10623.1	NA	NA	NA	NA		0.836635	2.54275	1.33982	0.876749	0.773407	0.848762	1.8885	0.917239	0.0493628	1	up	no
MSTRG.15500	LOC105396327	XM_011568323.1	GO:0002083(4-hydroxybenzoate decaprenyltransferase activity);GO:0004659(prenyltransferase activity);GO:0005739(mitochondrion);GO:0005743(mitochondrial inner membrane);GO:0006744(ubiquinone biosynthetic process);GO:0008299(isoprenoid biosynthetic process);GO:0016020(membrane);GO:0016021(integral component of membrane);GO:0016740(transferase activity);GO:0047293(4-hydroxybenzoate nonaprenyltransfer…	00130(Ubiquinone and other terpenoid-quinone biosynthesis)	K06125	EC:2.5.1.39	4-hydroxybenzoate polyprenyltransferase%2C mitochondrial	0.734064	2.11467	1.20327	2.85258	2.31314	2.09122	0.558362	-0.840726	0.0494976	1	down	no
MSTRG.6413		MSTRG.6413.1	NA	NA	NA	NA		4.06153	5.89401	4.69624	7.43701	7.21959	7.76561	0.653449	-0.613852	0.0496585	1	down	no
MSTRG.11138	LOC105390547	XM_011561866.1;MSTRG.11138.2;MSTRG.11138.3	GO:0001937(negative regulation of endothelial cell proliferation);GO:0005901(caveola);GO:0006906(vesicle fusion);GO:0007005(mitochondrion organization);GO:0007029(endoplasmic reticulum organization);GO:0031234(extrinsic component of cytoplasmic side of plasma membrane);GO:0031748(D1 dopamine receptor binding);GO:0048278(vesicle docking);GO:0048471(perinuclear region of cytoplasm);GO:0048741(skele…	04144(Endocytosis)	K12959	NA	uncharacterized LOC105390547	2.47361	2.05416	2.21048	3.24754	5.20824	2.28855	0.627145	-0.67313	0.0496912	1	down	no
MSTRG.11893		MSTRG.11893.1	NA	NA	NA	NA		5.5831	5.94612	5.25737	2.9997	4.39984	4.24076	1.44211	0.52818	0.0496933	1	up	no
MSTRG.3956	LOC105381604	XM_011551375.1	GO:0000139(Golgi membrane);GO:0004653(polypeptide N-acetylgalactosaminyltransferase activity);GO:0005112(Notch binding);GO:0016021(integral component of membrane);GO:0018243(protein O-linked glycosylation via threonine);GO:0030246(carbohydrate binding)	00512(Mucin type O-glycan biosynthesis)	K00710	EC:2.4.1.41	polypeptide N-acetylgalactosaminyltransferase 35A	0.301905	0.451658	0.355019	0.481377	1.21019	0.514223	0.502578	-0.992581	0.0498042	1	down	no
MSTRG.7598	LOC105386070	MSTRG.7598.1;XM_011556556.1;XM_011556555.1	GO:0004411(homogentisate 1,2-dioxygenase activity);GO:0006559(L-phenylalanine catabolic process);GO:0006570(tyrosine metabolic process);GO:0006572(tyrosine catabolic process);GO:0055114(oxidation-reduction process);GO:0055114(oxidation-reduction process)	00350(Tyrosine metabolism);00350(Tyrosine metabolism)	K00451	EC:1.13.11.5	homogentisate 1%2C2-dioxygenase%2C transcript variant X2	1.76869	2.08858	1.67261	4.66448	3.14873	1.6606	0.583702	-0.776696	0.0498088	1	down	no
MSTRG.16060	LOC105397662	XM_011569680.1	GO:0004325(ferrochelatase activity);GO:0005739(mitochondrion);GO:0006783(heme biosynthetic process)	00860(Porphyrin and chlorophyll metabolism)	K01772	EC:4.99.1.1;EC:4.99.1.9	ferrochelatase%2C mitochondrial-like	1.07965	1.77373	0.830722	1.76238	2.74207	2.54908	0.522305	-0.937036	0.0499853	1	down	no
MSTRG.3823		MSTRG.3823.1	NA	NA	NA	NA		3.79706	2.68628	2.72997	2.82579	1.29562	1.8096	1.55341	0.635441	0.0500029	1	up	no
MSTRG.12272	LOC105391919	XM_011563488.1	NA	NA	NA	NA	uncharacterized LOC105391919	2.4529	1.12399	0.916446	0.70127	0.532408	1.05886	1.95999	0.970844	0.0500664	1	up	no
MSTRG.10848	LOC105390182	XM_011561434.1;XM_011561435.1;XM_011561436.1	GO:0003674(molecular_function);GO:0005575(cellular_component);GO:0008150(biological_process);GO:0008150(biological_process)	04080(Neuroactive ligand-receptor interaction);04080(Neuroactive ligand-receptor interaction)	NA	NA	uncharacterized LOC105390182%2C transcript variant X2	3.99655	3.99514	1.41578	7.06325	8.15161	2.67344	0.525901	-0.927137	0.0500888	1	down	no
MSTRG.13680	LOC105393623	MSTRG.13680.1;MSTRG.13680.3;MSTRG.13680.2;MSTRG.13680.4;MSTRG.13680.5;MSTRG.13680.7;XM_011565414.1;MSTRG.13680.6	NA	NA	NA	NA	uncharacterized LOC105393623	238.193	131.841	207.142	156.292	129.493	133.951	1.37509	0.459527	0.0501684	1	up	no
MSTRG.14306	LOC105394389	XM_011566281.1	NA	NA	NA	NA	uncharacterized LOC105394389	2.78284	1.99449	3.09245	1.85799	1.47465	0.683693	1.95944	0.970444	0.0503243	1	up	no
MSTRG.7936	LOC105386478	MSTRG.7936.1;XM_011557037.1;XM_011557038.1	GO:0005886(plasma membrane);GO:0005886(plasma membrane)	NA	NA	NA	uncharacterized LOC105386478%2C transcript variant X1	5.04279	9.52999	9.42108	5.38543	5.0839	6.25585	1.4346	0.520644	0.050426	1	up	no
MSTRG.10296	LOC105389431	XM_011560533.1	GO:0000228(nuclear chromosome);GO:0000779(condensed chromosome, centromeric region);GO:0000793(condensed chromosome);GO:0000796(condensin complex);GO:0000799(nuclear condensin complex);GO:0003682(chromatin binding);GO:0005634(nucleus);GO:0005654(nucleoplasm);GO:0005694(chromosome);GO:0005737(cytoplasm);GO:0007049(cell cycle);GO:0007067(mitotic nuclear division);GO:0007076(mitotic chromosome conde…	NA	NA	NA	condensin complex subunit 1-like	0.532938	0.65985	0.499163	0.941038	1.13283	0.682048	0.613934	-0.703846	0.0505299	1	down	no
LOC105384398	LOC105384398	XM_011554627.1	NA	NA	K03654	EC:3.6.4.12	putative nuclease HARBI1	1.66846	1.02919	1.17888	0.766077	0.980574	0.510786	1.71723	0.780083	0.0505639	1	up	no
MSTRG.11672	LOC105391201	XM_011562648.1;XM_011562647.1	GO:0005524(ATP binding);GO:0005737(cytoplasm);GO:0006888(ER to Golgi vesicle-mediated transport);GO:0006909(phagocytosis);GO:0007030(Golgi organization);GO:0007269(neurotransmitter secretion);GO:0007274(neuromuscular synaptic transmission);GO:0008021(synaptic vesicle);GO:0016082(synaptic vesicle priming);GO:0016887(ATPase activity);GO:0031629(synaptic vesicle fusion to presynaptic active zone mem…	04962(Vasopressin-regulated water reabsorption);04727(GABAergic synapse);04721(Synaptic vesicle cycle);04721(Synaptic vesicle cycle)	NA	NA	vesicle-fusing ATPase 1-like%2C transcript variant X1	1.2654	1.81441	1.57141	1.7831	5.72251	1.35314	0.525043	-0.929493	0.0506305	1	down	no
MSTRG.15890	LOC105397326	MSTRG.15890.1	NA	NA	NA	NA		11.8976	13.3478	11.0969	6.00437	9.16941	10.1372	1.43583	0.521888	0.0506801	1	up	no
MSTRG.4169	LOC105381861	XM_011551664.1	GO:0004806(triglyceride lipase activity)	00100(Steroid biosynthesis);04142(Lysosome)	K01052	EC:3.1.1.13	lipase 1-like	7.39483	6.37228	12.4738	3.36844	5.36041	7.62525	1.60455	0.682167	0.050946	1	up	no
MSTRG.1671	LOC105396775	XM_011568785.1	GO:0003839(gamma-glutamylcyclotransferase activity);GO:0005576(extracellular region);GO:0006750(glutathione biosynthetic process);GO:0042381(hemolymph coagulation)	00480(Glutathione metabolism)	K00682	EC:4.3.2.9	gamma-glutamylcyclotransferase-like	13.2893	29.0315	43.1065	57.6395	22.6312	81.5918	0.527777	-0.922	0.0509499	1	down	no
MSTRG.11456	LOC105390957	XM_011562354.1	GO:0005085(guanyl-nucleotide exchange factor activity);GO:0005516(calmodulin binding);GO:0005886(plasma membrane);GO:0005938(cell cortex);GO:0008105(asymmetric protein localization);GO:0017112(Rab guanyl-nucleotide exchange factor activity);GO:0017137(Rab GTPase binding);GO:0031410(cytoplasmic vesicle);GO:0032483(regulation of Rab protein signal transduction);GO:0042998(positive regulation of Gol…	04931(Insulin resistance)	NA	NA	C-myc promoter-binding protein-like	0.229753	3.45378	0.788225	4.08131	4.10677	2.554	0.416284	-1.26436	0.0512632	1	down	no
MSTRG.2783	LOC105380229	XM_011549746.1	GO:0004672(protein kinase activity);GO:0005524(ATP binding);GO:0005859(muscle myosin complex);GO:0005865(striated muscle thin filament);GO:0006468(protein phosphorylation);GO:0006941(striated muscle contraction);GO:0008307(structural constituent of muscle);GO:0030018(Z disc);GO:0030240(skeletal muscle thin filament assembly);GO:0030241(skeletal muscle myosin thick filament assembly);GO:0031430(M …	04630(Jak-STAT signaling pathway)	NA	NA	cytokine receptor-like	1.16987	1.33427	0.883291	1.75204	1.76957	1.62942	0.657624	-0.604666	0.0513499	1	down	no
MSTRG.9971	LOC105388980	XM_011560028.1	GO:0005886(plasma membrane);GO:0009505(plant-type cell wall);GO:0016615(malate dehydrogenase activity)	01200(Carbon metabolism);00020(Citrate cycle (TCA cycle));00620(Pyruvate metabolism);00630(Glyoxylate and dicarboxylate metabolism);00270(Cysteine and methionine metabolism)	K00026	EC:1.1.1.37	malate dehydrogenase 2%2C mitochondrial-like	5.31173	3.61112	3.0176	3.22781	2.08267	2.6293	1.50388	0.588686	0.0514513	1	up	no
MSTRG.15039	LOC105395506	MSTRG.15039.1	NA	NA	NA	NA		13.7473	11.3042	14.502	23.5302	21.2486	15.1646	0.659847	-0.599797	0.0514736	1	down	no
MSTRG.7956	LOC105386508;LOC105386536	MSTRG.7956.12;XM_011557120.1;XM_011557094.1;MSTRG.7956.3;XM_011557085.1;XM_011557088.1;XM_011557086.1;XR_960710.1;XM_011557091.1;XM_011557092.1;XM_011557087.1;XM_011557090.1;XM_011557093.1	GO:0000812(Swr1 complex);GO:0005739(mitochondrion);GO:0007029(endoplasmic reticulum organization);GO:0043486(histone exchange);GO:0005886(plasma membrane);GO:0006936(muscle contraction);GO:0010649(regulation of cell communication by electrical coupling);GO:0010880(regulation of release of sequestered calcium ion into cytosol by sarcoplasmic reticulum);GO:0014701(junctional sarcoplasmic reticulum …	03013(RNA transport);03015(mRNA surveillance pathway);03015(mRNA surveillance pathway)	NA	NA	uncharacterized LOC105386536;uncharacterized LOC105386508%2C transcript variant X8	8.44343	6.84574	6.35961	6.22666	4.13424	5.39991	1.37358	0.457945	0.0519133	1	up	no
LOC105380085	LOC105380085	XM_011549584.1	GO:0000902(cell morphogenesis);GO:0003331(positive regulation of extracellular matrix constituent secretion);GO:0005048(signal sequence binding);GO:0005215(transporter activity);GO:0005811(lipid particle);GO:0007029(endoplasmic reticulum organization);GO:0007030(Golgi organization);GO:0008270(zinc ion binding);GO:0008360(regulation of cell shape);GO:0009306(protein secretion);GO:0016203(muscle at…	04141(Protein processing in endoplasmic reticulum)	K14007	NA	protein transport protein Sec24C-like	0.383126	1.64645	0.456547	2.98905	2.88002	0.674745	0.379919	-1.39623	0.0519556	1	down	no
MSTRG.9428		MSTRG.9428.1	NA	NA	NA	NA		1.31884	1.37324	1.97492	5.5514	3.04384	1.36033	0.468783	-1.09301	0.0521147	1	down	no
MSTRG.4923	LOC105382746	XM_011552682.1	NA	NA	NA	NA	sericin 1-like	9.46161	6.83399	4.66092	4.78813	3.24426	5.51104	1.54736	0.629807	0.0521148	1	up	no
MSTRG.3055	LOC105380549	XM_011550126.1	GO:0004222(metalloendopeptidase activity);GO:0006508(proteolysis);GO:0008270(zinc ion binding);GO:0017090(meprin A complex)	04330(Notch signaling pathway);04320(Dorso-ventral axis formation)	NA	NA	zinc metalloproteinase nas-13-like	3.0661	2.48786	4.15542	0.995793	1.4893	2.97203	1.77921	0.83124	0.0522434	1	up	no
MSTRG.15383	LOC105396069	XM_011568053.1;MSTRG.15383.2	GO:0005789(endoplasmic reticulum membrane);GO:0071782(endoplasmic reticulum tubular network);GO:0071786(endoplasmic reticulum tubular network organization)	NA	NA	NA	protein lunapark-B-like	1.26659	4.94372	4.72856	6.52107	7.45244	5.60247	0.55879	-0.839621	0.0523588	1	down	no
MSTRG.11218		MSTRG.11218.1	NA	NA	NA	NA		4.39673	1.04327	4.25006	4.77686	9.00926	6.8078	0.47053	-1.08764	0.052499	1	down	no
MSTRG.3081	LOC105380563	XM_011550144.1;MSTRG.3081.2	GO:0000166(nucleotide binding);GO:0003924(GTPase activity);GO:0005200(structural constituent of cytoskeleton);GO:0005525(GTP binding);GO:0005737(cytoplasm);GO:0005856(cytoskeleton);GO:0005874(microtubule);GO:0005876(spindle microtubule);GO:0007017(microtubule-based process);GO:0008152(metabolic process)	04145(Phagosome)	K07375	NA	tubulin beta chain-like	8.25983	12.3166	9.0522	9.22562	31.8504	10.9228	0.569794	-0.811487	0.0525144	1	down	no
MSTRG.4872	LOC105382679	XM_011552603.1;XM_011552602.1	GO:0004175(endopeptidase activity);GO:0004222(metalloendopeptidase activity);GO:0005615(extracellular space);GO:0005886(plasma membrane);GO:0006508(proteolysis);GO:0008237(metallopeptidase activity);GO:0016021(integral component of membrane);GO:0046692(sperm competition);GO:0046692(sperm competition)	04640(Hematopoietic cell lineage);04614(Renin-angiotensin system);04974(Protein digestion and absorption);05010(Alzheimer's disease);05010(Alzheimer's disease)	NA	NA	neprilysin-11%2C transcript variant X2	44.9731	55.8907	40.822	30.9137	46.0233	29.561	1.33041	0.411869	0.052706	1	up	no
MSTRG.11668	LOC105391198	XM_011562644.1	GO:0005634(nucleus);GO:0005654(nucleoplasm);GO:0008150(biological_process);GO:0044822(poly(A) RNA binding)	NA	NA	NA	protein FAM32A-like	17.6462	21.1662	17.0601	11.347	14.4229	14.3134	1.39391	0.479136	0.052733	1	up	no
LOC105391915	LOC105391915	XM_011563484.1	GO:0003779(actin binding);GO:0007605(sensory perception of sound);GO:0008407(chaeta morphogenesis);GO:0009913(epidermal cell differentiation);GO:0031941(filamentous actin);GO:0035017(cuticle pattern formation);GO:0035317(imaginal disc-derived wing hair organization);GO:0048800(antennal morphogenesis);GO:0051017(actin filament bundle assembly)	05205(Proteoglycans in cancer)	NA	NA	espin-like	0.892855	0.945649	0.730744	1.09222	3.60779	0.755247	0.470967	-1.0863	0.0528002	1	down	no
MSTRG.16090	LOC105397744	XM_011569762.1	GO:0004512(inositol-3-phosphate synthase activity);GO:0005515(protein binding);GO:0005737(cytoplasm);GO:0006021(inositol biosynthetic process);GO:0008654(phospholipid biosynthetic process);GO:0009408(response to heat);GO:0009644(response to high light intensity);GO:0009733(response to auxin);GO:0009793(embryo development ending in seed dormancy);GO:0010264(myo-inositol hexakisphosphate biosynthet…	00562(Inositol phosphate metabolism)	K01858	EC:5.5.1.4	inositol-3-phosphate synthase 1-A-like	1.97078	1.97429	0.573952	0.276513	0.355443	1.23725	2.41761	1.27358	0.0528725	1	up	no
MSTRG.7382	LOC105385799;LOC105385802	XM_011556236.1;XM_011556239.1;XM_011556238.1;XM_011556237.1	GO:0005886(plasma membrane);GO:0008417(fucosyltransferase activity);GO:0008417(fucosyltransferase activity)	00601(Glycosphingolipid biosynthesis - lacto and neolacto series)	NA	NA	alpha-(1%2C3)-fucosyltransferase C-like%2C transcript variant X2;alpha-(1%2C3)-fucosyltransferase C-like	5.27787	5.56519	4.4214	4.18443	2.90908	3.75285	1.40733	0.492964	0.0533219	1	up	no
MSTRG.11723	LOC105391291;LOC105391292	XM_011562756.1;MSTRG.11723.1;MSTRG.11723.3	GO:0004252(serine-type endopeptidase activity);GO:0005044(scavenger receptor activity);GO:0006508(proteolysis);GO:0016020(membrane)	NA	NA	NA	uncharacterized LOC105391291	43.2222	54.0044	80.3487	20.9369	22.7251	61.572	1.68743	0.754831	0.0534021	1	up	no
LOC105389940	LOC105389940	XM_011561146.1	GO:0005759(mitochondrial matrix);GO:0006974(cellular response to DNA damage stimulus);GO:1902445(regulation of mitochondrial membrane permeability involved in programmed necrotic cell death)	NA	NA	NA	uncharacterized LOC105389940	0	0.505999	0.501877	1.1652	0.884313	0.859081	0.346517	-1.529	0.053545	1	down	no
MSTRG.2684		MSTRG.2684.1	NA	NA	NA	NA		3.49821	3.19951	3.71085	6.60574	4.94454	5.38965	0.61444	-0.702656	0.0535538	1	down	no
MSTRG.3372	LOC105380976	MSTRG.3372.1	NA	NA	NA	NA		4.70061	2.75825	2.36512	2.13241	1.22763	1.79301	1.90644	0.930881	0.0540043	1	up	no
MSTRG.7478		MSTRG.7478.1	NA	NA	NA	NA		4.89923	2.99925	2.76057	2.519	2.32821	1.78842	1.60634	0.683773	0.0542156	1	up	no
LOC105396927	LOC105396927	XM_011568939.1	NA	NA	NA	NA	methyltransferase-like protein 9	3.05483	3.30507	3.29132	1.87412	2.50995	2.29304	1.44542	0.531489	0.0543687	1	up	no
LOC105398421	LOC105398421	XM_011570529.1;XM_011570530.1	GO:0003674(molecular_function);GO:0005575(cellular_component);GO:0008150(biological_process);GO:0008150(biological_process)	NA	NA	NA	GSK3-beta interaction protein-like	0.764284	1.86024	2.07638	3.13246	2.74958	2.70442	0.547479	-0.869124	0.0546164	1	down	no
MSTRG.10051	LOC105389099	XM_011560162.1;MSTRG.10051.4;MSTRG.10051.1;MSTRG.10051.3	GO:0005044(scavenger receptor activity);GO:0005887(integral component of plasma membrane);GO:0006952(defense response);GO:0016020(membrane);GO:0035071(salivary gland cell autophagic cell death);GO:0048102(autophagic cell death)	04142(Lysosome)	K13885	NA	lysosome membrane protein 2-like	6.11028	10.5499	9.02051	15.9694	12.6203	10.3226	0.659965	-0.599538	0.0546877	1	down	no
LOC105389613	LOC105389613	XM_011560756.1	NA	NA	NA	NA	uncharacterized LOC105389613	0.473674	0.366322	0.59689	0.938894	0.967213	0.936635	0.505458	-0.984338	0.0548331	1	down	no
MSTRG.5023		MSTRG.5023.1	NA	NA	NA	NA		10.7549	3.74714	3.33445	4.10981	3.38731	2.68672	1.75145	0.808547	0.0550684	1	up	no
MSTRG.12238	LOC105391894	MSTRG.12238.1	NA	NA	NA	NA		9.22477	7.70038	8.66123	5.18347	6.42612	6.53556	1.41009	0.495792	0.0552378	1	up	no
MSTRG.34	LOC105387360	XM_011558416.1	GO:0004252(serine-type endopeptidase activity);GO:0005576(extracellular region);GO:0006508(proteolysis);GO:0006952(defense response);GO:0007311(maternal specification of dorsal/ventral axis, oocyte, germ-line encoded);GO:0008063(Toll signaling pathway);GO:0008233(peptidase activity);GO:0008236(serine-type peptidase activity);GO:0009950(dorsal/ventral axis specification);GO:0031638(zymogen activat…	04080(Neuroactive ligand-receptor interaction)	NA	NA	serine protease easter-like	1.79097	2.03262	2.22595	4.10736	3.16349	2.38126	0.626759	-0.674018	0.0552488	1	down	no
MSTRG.4068	LOC105381772	XM_011551569.1	GO:0007476(imaginal disc-derived wing morphogenesis);GO:0046872(metal ion binding)	NA	NA	NA	zinc finger protein 395-like	2.34346	2.43843	3.75593	3.49308	6.23804	4.0052	0.62155	-0.686057	0.0554009	1	down	no
MSTRG.3019	LOC105380494	MSTRG.3019.1	NA	NA	NA	NA		325.403	288.414	415.54	661.19	553.308	333.878	0.664797	-0.589014	0.0555271	1	down	no
LOC105381625	LOC105381625	XM_011551401.1	GO:0000070(mitotic sister chromatid segregation);GO:0005813(centrosome);GO:0008017(microtubule binding)	NA	NA	NA	uncharacterized LOC105381625	0.476391	0.626282	0.628744	1.49529	0.937957	0.824733	0.531439	-0.912025	0.0555949	1	down	no
MSTRG.4386	LOC105382157	MSTRG.4386.1	NA	NA	NA	NA		5.70572	2.4732	4.21788	3.51263	2.30503	1.76902	1.63402	0.708429	0.0556139	1	up	no
MSTRG.7643	LOC105386131	XM_011556631.1	GO:0001517(N-acetylglucosamine 6-O-sulfotransferase activity);GO:0006790(sulfur compound metabolic process);GO:0016021(integral component of membrane)	00533(Glycosaminoglycan biosynthesis - keratan sulfate)	K09671	EC:2.8.2.-	carbohydrate sulfotransferase 4-like	0.076036	0.874946	0.938761	1.95623	0.790242	1.94025	0.403212	-1.31039	0.055666	1	down	no
MSTRG.6102		MSTRG.6102.1	NA	NA	NA	NA		8.19209	10.5152	8.55817	15.5214	19.9873	7.65753	0.631639	-0.662829	0.0557729	1	down	no
MSTRG.5466	LOC105383474	XM_011553524.1	GO:0003674(molecular_function);GO:0005575(cellular_component);GO:0008150(biological_process)	NA	NA	NA	RIB43A-like with coiled-coils protein 2	3.89207	4.15893	3.70447	3.61498	1.98524	2.41669	1.46633	0.552214	0.0558216	1	up	no
MSTRG.7409	LOC105385838	XM_011556284.1	GO:0005524(ATP binding);GO:0005777(peroxisome);GO:0008152(metabolic process);GO:0009507(chloroplast);GO:0009611(response to wounding);GO:0009695(jasmonic acid biosynthetic process);GO:0009698(phenylpropanoid metabolic process);GO:0016021(integral component of membrane);GO:0016207(4-coumarate-CoA ligase activity);GO:0016874(ligase activity)	00360(Phenylalanine metabolism);00130(Ubiquinone and other terpenoid-quinone biosynthesis)	K01904	EC:6.2.1.12	4-coumarate--CoA ligase 1-like	0.826986	2.59052	1.51825	2.98364	1.30397	5.52514	0.502995	-0.991383	0.0558621	1	down	no
MSTRG.7830	LOC105386366	XM_011556900.1	GO:0005634(nucleus);GO:0008270(zinc ion binding);GO:0016567(protein ubiquitination);GO:0030010(establishment of cell polarity);GO:0031152(aggregation involved in sorocarp development);GO:0031434(mitogen-activated protein kinase kinase binding);GO:0032507(maintenance of protein location in cell);GO:0043327(chemotaxis to cAMP);GO:0046872(metal ion binding);GO:0061630(ubiquitin protein ligase activi…	NA	NA	NA	E3 ubiquitin-protein ligase RING2-like	28.5677	18.5308	18.7591	17.395	13.011	15.8158	1.42482	0.510777	0.0559025	1	up	no
MSTRG.3646	LOC105381255	XM_011550944.1	GO:0006497(protein lipidation);GO:0009408(response to heat);GO:0010506(regulation of autophagy);GO:0010998(regulation of translational initiation by eIF2 alpha phosphorylation);GO:0030018(Z disc);GO:0042026(protein refolding);GO:0045214(sarcomere organization);GO:0048471(perinuclear region of cytoplasm)	04141(Protein processing in endoplasmic reticulum);04213(Longevity regulating pathway - multiple species)	K09542	NA	protein lethal(2)essential for life-like	10.6912	7.87133	10.7946	8.29354	5.11449	6.74419	1.45677	0.542773	0.0561252	1	up	no
MSTRG.13647	LOC105393558;LOC105393567;LOC105393560	MSTRG.13647.1;XM_011565351.1;XM_011565343.1;XM_011565341.1;XM_011565342.1	NA	NA	NA	NA	uncharacterized LOC105393567;neurofilament heavy polypeptide-like;uncharacterized LOC105393558%2C transcript variant X2	17.3662	11.2414	9.63162	10.7406	7.06788	9.22679	1.41442	0.500212	0.0564124	1	up	no
MSTRG.11542	LOC105391071	XM_011562480.1	NA	NA	NA	NA	uncharacterized LOC105391071	1.61753	1.76856	1.91253	0.968702	1.35367	1.23094	1.49118	0.576454	0.0564703	1	up	no
MSTRG.4798	LOC105382600	XM_011552512.1;XM_011552513.1	NA	NA	NA	NA	protein IWS1 homolog%2C transcript variant X1	24.5165	28.6912	23.9555	19.0809	8.18231	22.4014	1.55369	0.635697	0.0565764	1	up	no
MSTRG.5140	LOC105383047	MSTRG.5140.2;XM_011553061.1	GO:0001745(compound eye morphogenesis);GO:0004672(protein kinase activity);GO:0005524(ATP binding);GO:0005795(Golgi stack);GO:0006468(protein phosphorylation);GO:0007219(Notch signaling pathway);GO:0007291(sperm individualization);GO:0016191(synaptic vesicle uncoating);GO:1901215(negative regulation of neuron death)	04144(Endocytosis)	NA	NA	cyclin-G-associated kinase	5.41042	4.80511	3.5996	2.25286	5.06119	2.02397	1.47945	0.565061	0.0565769	1	up	no
MSTRG.12475		MSTRG.12475.1	NA	NA	NA	NA		2.21313	1.79367	2.26713	4.27889	2.74181	5.71793	0.492511	-1.02177	0.0568274	1	down	no
LOC105395624	LOC105395624	XM_011567581.1	GO:0005515(protein binding);GO:0005737(cytoplasm);GO:0005856(cytoskeleton);GO:0031514(motile cilium)	NA	NA	NA	coiled-coil domain-containing protein lobo homolog	0.898769	0.609213	0.759764	0.441996	0.340352	0.537225	1.71855	0.781188	0.0568363	1	up	no
MSTRG.420	LOC105381389	XM_011551108.1	GO:0005214(structural constituent of chitin-based cuticle);GO:0008010(structural constituent of chitin-based larval cuticle);GO:0031012(extracellular matrix);GO:0040003(chitin-based cuticle development)	NA	NA	NA	larval cuticle protein LCP-30-like	80.4475	217.831	265.56	301.131	169.139	561.501	0.546477	-0.871766	0.056919	1	down	no
MSTRG.14951	LOC105395365	XM_011567320.1	NA	NA	NA	NA	pupal cuticle protein C1B-like	6.23535	12.7768	13.2612	7.7089	6.88959	63.6892	0.412241	-1.27844	0.0570392	1	down	no
MSTRG.8624	LOC105387330	XM_011558038.1	GO:0005634(nucleus);GO:0005737(cytoplasm);GO:0006598(polyamine catabolic process);GO:0046208(spermine catabolic process);GO:0046592(polyamine oxidase activity);GO:0055114(oxidation-reduction process)	04146(Peroxisome)	K12259	EC:1.5.3.16;EC:1.5.3.-	spermine oxidase-like	12.8323	8.60746	6.94628	8.33387	5.00867	6.02302	1.4658	0.551688	0.0570756	1	up	no
MSTRG.5500	LOC105383522	MSTRG.5500.1	NA	NA	NA	NA		6.51214	7.26213	5.46358	3.32606	4.44727	4.04132	1.6283	0.703371	0.0571017	1	up	no
MSTRG.14431	LOC105394560	XM_011566467.1	NA	NA	NA	NA	uncharacterized LOC105394560	4.93285	3.35211	2.68001	2.71471	1.75405	1.95653	1.70653	0.771068	0.0571701	1	up	no
MSTRG.15283	LOC105395856	XM_011567832.1	GO:0003735(structural constituent of ribosome);GO:0006412(translation)	04020(Calcium signaling pathway);04022(cGMP - PKG signaling pathway);05012(Parkinson's disease);05016(Huntington's disease);05166(HTLV-I infection);05164(Influenza A)	NA	NA	ADP%2CATP carrier protein 1-like	41.676	30.3319	25.2664	29.3651	18.8183	21.2617	1.40074	0.486186	0.0572187	1	up	no
MSTRG.1318	LOC105392440	XM_011564067.1	NA	NA	NA	NA	uncharacterized LOC105392440	4.73563	2.95468	2.45286	1.8438	1.68152	2.91033	1.57609	0.656352	0.0573212	1	up	no
MSTRG.9820	LOC105388806	XM_011559786.1	NA	NA	NA	NA	uncharacterized LOC105388806	7.36688	6.07264	4.48208	3.82165	3.08022	4.35918	1.59147	0.670358	0.0574874	1	up	no
LOC105391111	LOC105391111	XM_011562528.1	GO:0004222(metalloendopeptidase activity);GO:0005737(cytoplasm);GO:0006338(chromatin remodeling);GO:0007052(mitotic spindle organization);GO:0007076(mitotic chromosome condensation);GO:0007100(mitotic centrosome separation);GO:0007155(cell adhesion);GO:0007420(brain development);GO:0007444(imaginal disc development);GO:0008233(peptidase activity);GO:0008354(germ cell migration);GO:0008406(gonad d…	01212(Fatty acid metabolism);00071(Fatty acid degradation);04931(Insulin resistance)	NA	NA	leishmanolysin-like peptidase	0.249855	0.28575	0.634023	1.01364	0.662272	0.688702	0.494639	-1.01555	0.0575561	1	down	no
MSTRG.4813		MSTRG.4813.1	NA	NA	NA	NA		2.98226	3.51439	1.8982	5.66709	3.11486	7.70635	0.50914	-0.973866	0.0575675	1	down	no
MSTRG.5614	LOC105383652	XM_011553741.1	NA	NA	NA	NA	reticulocyte-binding protein 2 homolog a	3.54592	5.09706	5.53566	2.59909	4.07467	3.28316	1.424	0.509947	0.0577939	1	up	no
MSTRG.6924	LOC105385250	XM_011555599.1	NA	NA	NA	NA	uncharacterized LOC105385250	21.2427	16.8019	21.1983	22.4948	35.3311	30.893	0.667759	-0.5826	0.0579209	1	down	no
LOC105387067	LOC105387067	XR_960744.1;XM_011557740.1	NA	NA	NA	NA	uncharacterized LOC105387067%2C transcript variant X1	2.9288	2.54523	2.7853	2.03559	1.42483	2.28325	1.43799	0.524053	0.0580078	1	up	no
MSTRG.11651	LOC105391175	XM_011562613.1	NA	NA	NA	NA	uncharacterized LOC105391175	2.24919	1.56162	2.02328	0.717989	1.8974	0.855424	1.6809	0.749233	0.0583565	1	up	no
MSTRG.13670	LOC105393621	XM_011565412.1	GO:0009820(alkaloid metabolic process);GO:0033784(senecionine N-oxygenase activity);GO:0050660(flavin adenine dinucleotide binding);GO:0051289(protein homotetramerization);GO:0055114(oxidation-reduction process)	00982(Drug metabolism - cytochrome P450)	K00485	EC:1.14.13.8	senecionine N-oxygenase-like	14.6455	15.2751	13.729	21.0849	17.9943	23.5387	0.697078	-0.520608	0.0584092	1	down	no
MSTRG.5525	LOC105383561	XM_011553629.1	NA	00670(One carbon pool by folate)	NA	NA	uncharacterized LOC105383561	4.25117	5.04508	4.23032	10.3055	4.82109	6.06243	0.638375	-0.647524	0.058497	1	down	no
MSTRG.1190		MSTRG.1190.1	NA	NA	NA	NA		3.52159	3.04108	2.16868	5.90153	5.87767	4.37141	0.54062	-0.887312	0.0585125	1	down	no
MSTRG.8669		MSTRG.8669.1	NA	NA	NA	NA		0.649417	0.98063	2.68402	3.89475	1.23437	4.29054	0.457986	-1.12663	0.0585127	1	down	no
MSTRG.6459	LOC105384699	XR_960626.1	NA	NA	NA	NA	uncharacterized LOC105384699	74.0393	102.618	72.7585	103.603	145.617	111.277	0.691867	-0.531434	0.0585725	1	down	no
MSTRG.3538	LOC105381112	XM_011550762.1;MSTRG.3538.2	GO:0016020(membrane);GO:0016021(integral component of membrane);GO:0055085(transmembrane transport)	NA	NA	NA	MFS-type transporter SLC18B1-like	8.10384	3.93557	3.63482	12.7134	12.3857	3.60345	0.546091	-0.872786	0.0586606	1	down	no
MSTRG.5694	LOC105383775	MSTRG.5694.1;MSTRG.5694.2	NA	NA	NA	NA		8.94492	13.6586	12.9587	18.8356	11.979	25.1688	0.635229	-0.654652	0.0589709	1	down	no
MSTRG.3284	LOC105380891	MSTRG.3284.1	NA	NA	NA	NA		18.7512	24.0323	11.436	11.2951	8.70445	15.2388	1.53865	0.621663	0.0590436	1	up	no
MSTRG.7803	LOC105386327	XM_011556849.1	NA	NA	NA	NA	cuticle protein 16.5%2C isoform B-like	268.142	305.944	428.107	143.538	133.553	353.422	1.58949	0.668565	0.0591613	1	up	no
MSTRG.14830	LOC105395129	XM_011567060.1	NA	NA	NA	NA	calponin homology domain-containing protein DDB_G0272472-like	5.46657	3.71062	3.67051	3.84745	2.32335	2.73293	1.44296	0.529028	0.0591934	1	up	no
LOC105385057	LOC105385057	XM_011555370.1	GO:0000137(Golgi cis cisterna);GO:0005622(intracellular);GO:0005783(endoplasmic reticulum);GO:0006024(glycosaminoglycan biosynthetic process);GO:0006790(sulfur compound metabolic process);GO:0007166(cell surface receptor signaling pathway);GO:0007283(spermatogenesis);GO:0007367(segment polarity determination);GO:0007427(epithelial cell migration, open tracheal system);GO:0007428(primary branching…	00534(Glycosaminoglycan biosynthesis - heparan sulfate / heparin)	K02577	EC:3.1.1.-;EC:2.8.2.-	bifunctional heparan sulfate N-deacetylase/N-sulfotransferase-like	0.570208	0.598294	0.537442	1.11118	1.30516	0.642652	0.55768	-0.84249	0.0593617	1	down	no
MSTRG.14634	LOC105394864	MSTRG.14634.1	NA	NA	NA	NA		11.511	12.2682	4.42743	6.68257	6.34014	3.44285	1.71307	0.776585	0.0594382	1	up	no
MSTRG.176	LOC105396623	XM_011568662.1	GO:0005506(iron ion binding);GO:0009055(electron carrier activity);GO:0016020(membrane);GO:0016705(oxidoreductase activity, acting on paired donors, with incorporation or reduction of molecular oxygen);GO:0020037(heme binding);GO:0043231(intracellular membrane-bounded organelle);GO:0055114(oxidation-reduction process)	00981(Insect hormone biosynthesis)	NA	NA	probable cytochrome P450 305a1	14.179	16.2122	21.6114	28.8805	16.7724	34.5245	0.648594	-0.624612	0.0594787	1	down	no
MSTRG.6740	LOC105385052	XM_011555366.1	NA	NA	NA	NA	la-related protein 1-like	1.09099	3.29734	2.66053	3.74996	4.56671	5.17802	0.522344	-0.936928	0.0595537	1	down	no
MSTRG.4137	LOC105381830	XM_011551631.1	GO:0005575(cellular_component);GO:0016491(oxidoreductase activity)	00830(Retinol metabolism)	K11153	EC:1.1.1.300	retinol dehydrogenase 12-like	0.640442	2.35921	1.64969	3.70619	2.37665	2.59388	0.535841	-0.900124	0.0598778	1	down	no
MSTRG.13217	LOC105393078	XM_011564790.1;XM_011564791.1	NA	NA	NA	NA	uncharacterized LOC105393078%2C transcript variant X1	6.73988	4.7312	5.36283	17.4499	7.476	4.65043	0.569168	-0.813073	0.0599494	1	down	no
MSTRG.11035		MSTRG.11035.1	NA	NA	NA	NA		5.65916	1.89533	5.3979	1.9522	3.37726	1.43501	1.91477	0.937169	0.0599701	1	up	no
MSTRG.9986	LOC105389014	XM_011560067.1	NA	NA	NA	NA	uncharacterized LOC105389014	5.8304	3.3199	5.31061	3.47896	2.46743	2.91443	1.63201	0.706647	0.0600255	1	up	no
MSTRG.13370	LOC105393262	MSTRG.13370.1	NA	NA	NA	NA		6.20485	5.38316	4.35387	4.22966	3.5794	2.79375	1.50355	0.588375	0.0600382	1	up	no
MSTRG.9193	LOC105388008	XM_011558837.1;XM_011558838.1	GO:0006457(protein folding);GO:0051082(unfolded protein binding);GO:0051082(unfolded protein binding)	04141(Protein processing in endoplasmic reticulum);04141(Protein processing in endoplasmic reticulum)	K09556	NA	BAG family molecular chaperone regulator 2-like%2C transcript variant X1	0.754086	0.504624	1.7225	2.75659	0.722564	2.56488	0.493248	-1.01961	0.060086	1	down	no
MSTRG.1724	LOC105397189	XM_011569205.1	GO:0005777(peroxisome);GO:0005811(lipid particle);GO:0006635(fatty acid beta-oxidation);GO:0008152(metabolic process);GO:0008416(delta5-delta2,4-dienoyl-CoA isomerase activity)	04146(Peroxisome)	K12663	EC:5.3.3.21	delta(3%2C5)-Delta(2%2C4)-dienoyl-CoA isomerase%2C mitochondrial	4.869	5.78263	4.00426	2.6223	4.11476	3.43285	1.4411	0.527174	0.0601756	1	up	no
MSTRG.6286	LOC105384471	XM_011554723.1	NA	NA	NA	NA	uncharacterized LOC105384471	16.0306	11.5993	12.0164	8.42455	6.37878	12.0331	1.47733	0.562993	0.0602788	1	up	no
MSTRG.12607	LOC105392334	XM_011563945.1	NA	NA	NA	NA	uncharacterized LOC105392334	0.776671	0.345274	0.461465	0.40968	0.281118	0.138306	1.90978	0.93341	0.0604557	1	up	no
MSTRG.1744	LOC105397331	XM_011569348.1	GO:0004129(cytochrome-c oxidase activity);GO:0005634(nucleus);GO:0005751(mitochondrial respiratory chain complex IV);GO:0005829(cytosol);GO:0033617(mitochondrial respiratory chain complex IV assembly)	00190(Oxidative phosphorylation)	K02267	NA	cytochrome c oxidase subunit 6b-2-like	34.2671	21.1323	23.9072	20.7697	14.6385	19.3793	1.44753	0.533592	0.0604789	1	up	no
MSTRG.15325	LOC105395931;LOC105395930	MSTRG.15325.2;XM_011567910.1;XM_011567909.1	GO:0016021(integral component of membrane);GO:0004872(receptor activity)	NA	K07297	NA	progestin and adipoQ receptor family member 3-like	6.19329	6.9427	6.63773	10.7764	11.7146	7.10166	0.668196	-0.581656	0.0609903	1	down	no
MSTRG.3400	LOC105380996	XM_011550621.1;XM_011550622.1	GO:0005942(phosphatidylinositol 3-kinase complex);GO:0016303(1-phosphatidylinositol-3-kinase activity);GO:0016303(1-phosphatidylinositol-3-kinase activity)	00562(Inositol phosphate metabolism);04070(Phosphatidylinositol signaling system);04145(Phagosome);04140(Regulation of autophagy);04140(Regulation of autophagy)	K00914	EC:2.7.1.137	phosphatidylinositol 3-kinase catalytic subunit type 3-like%2C transcript variant X2	0.502106	0.597054	0.457095	1.52344	0.769919	0.725761	0.515467	-0.956048	0.0610308	1	down	no
MSTRG.8933	LOC105387675	XM_011558440.1	GO:0005875(microtubule associated complex);GO:0007017(microtubule-based process);GO:0008017(microtubule binding)	NA	NA	NA	tektin-4-like	4.03787	4.49951	4.73911	3.72382	1.90656	3.34008	1.48002	0.565619	0.0612163	1	up	no
MSTRG.11568	LOC105391078	XM_011562486.1	NA	00670(One carbon pool by folate)	NA	NA	uncharacterized LOC105391078	3.86489	4.67154	3.72312	9.14091	4.26255	5.75593	0.639871	-0.644146	0.0612453	1	down	no
MSTRG.3657	LOC105381286	XM_011550979.1	GO:0005391(sodium:potassium-exchanging ATPase activity);GO:0005886(plasma membrane);GO:0005890(sodium:potassium-exchanging ATPase complex);GO:0005918(septate junction);GO:0006812(cation transport);GO:0006813(potassium ion transport);GO:0006814(sodium ion transport);GO:0007424(open tracheal system development);GO:0007605(sensory perception of sound);GO:0008324(cation transmembrane transporter acti…	04260(Cardiac muscle contraction);04261(Adrenergic signaling in cardiomyocytes)	NA	NA	sodium/potassium-transporting ATPase subunit beta-2-like	0.332071	0.64042	0.422962	0.903387	0.530613	1.26103	0.517788	-0.949567	0.0612693	1	down	no
MSTRG.6716	LOC105385033	MSTRG.6716.2;XM_011555348.1	NA	NA	NA	NA	nucleolar protein 58-like	5.61157	3.90363	3.35257	6.68887	6.19607	7.19728	0.640754	-0.642156	0.0613222	1	down	no
MSTRG.2632	LOC105380038	XM_011549521.1;XM_011549522.1	GO:0004181(metallocarboxypeptidase activity);GO:0005615(extracellular space);GO:0005615(extracellular space)	04972(Pancreatic secretion);04974(Protein digestion and absorption);04974(Protein digestion and absorption)	NA	NA	carboxypeptidase B-like%2C transcript variant X2	2.37638	1.97834	2.156	1.63697	1.16414	1.45907	1.52828	0.611905	0.0614358	1	up	no
MSTRG.371	LOC105381846	XM_011551651.1	GO:0004067(asparaginase activity);GO:0006520(cellular amino acid metabolic process)	NA	NA	NA	L-asparaginase-like	1.4183	2.28965	2.33004	6.17475	1.87242	4.19817	0.493085	-1.02009	0.0614374	1	down	no
MSTRG.8376	LOC105387018	XM_011557685.1;XM_011557686.1;XM_011557687.1	NA	NA	K10523	NA	uncharacterized LOC105387018%2C transcript variant X3	3.54283	2.89738	7.00715	7.55708	9.00045	5.78036	0.601998	-0.732169	0.0618767	1	down	no
MSTRG.3309		MSTRG.3309.1	NA	NA	NA	NA		6.84234	6.48512	7.22973	3.78951	4.68278	5.53915	1.46717	0.553038	0.0618947	1	up	no
MSTRG.12578	LOC105392285	MSTRG.12578.1	NA	NA	NA	NA		8.7107	8.82968	10.9653	12.4643	14.8653	16.1741	0.655246	-0.609891	0.0619284	1	down	no
MSTRG.722	LOC105385331	XM_011555695.1;MSTRG.722.2	GO:0008422(beta-glucosidase activity);GO:1901657(glycosyl compound metabolic process)	00052(Galactose metabolism)	K01229	EC:3.2.1.108;EC:3.2.1.62	myrosinase 1-like	17.1367	21.2178	23.9677	17.0266	15.6785	14.3647	1.32404	0.404945	0.061974	1	up	no
MSTRG.16004	LOC105397543	XR_961160.1	NA	NA	NA	NA	uncharacterized LOC105397543	2.57233	8.35829	8.15982	9.85239	10.2913	13.6837	0.564347	-0.825345	0.0619796	1	down	no
MSTRG.3832	LOC105381446	XM_011551173.1;XM_011551172.1	GO:0005575(cellular_component);GO:0006909(phagocytosis);GO:0016042(lipid catabolic process);GO:0016298(lipase activity);GO:0052689(carboxylic ester hydrolase activity);GO:0052689(carboxylic ester hydrolase activity)	00561(Glycerolipid metabolism);00561(Glycerolipid metabolism)	NA	NA	pancreatic triacylglycerol lipase-like%2C transcript variant X2	5.59888	4.60822	6.66333	4.28785	4.70858	2.83943	1.42537	0.511333	0.0621833	1	up	no
MSTRG.15736	LOC105396990	XM_011568998.1	GO:0003674(molecular_function);GO:0005887(integral component of plasma membrane);GO:0008150(biological_process)	NA	NA	NA	uncharacterized LOC105396990	130.972	123.517	190.024	251.88	283.763	137.487	0.660367	-0.59866	0.0622591	1	down	no
MSTRG.5231	LOC105383138	XM_011553154.1	GO:0001881(receptor recycling);GO:0005096(GTPase activator activity);GO:0005769(early endosome);GO:0006886(intracellular protein transport);GO:0017137(Rab GTPase binding);GO:0031338(regulation of vesicle fusion)	NA	K20168	NA	TBC1 domain family member 16-like	0.259335	0.253559	0.307985	0.419713	0.592316	0.457794	0.558488	-0.840401	0.0622747	1	down	no
LOC105380661	LOC105380661	XM_011550257.1	GO:0003677(DNA binding);GO:0003700(transcription factor activity, sequence-specific DNA binding);GO:0005634(nucleus);GO:0006351(transcription, DNA-templated);GO:0006355(regulation of transcription, DNA-templated);GO:0008270(zinc ion binding)	04320(Dorso-ventral axis formation)	NA	NA	zinc finger protein 33B-like	0.877316	1.07678	0.925316	0.736223	0.5052	0.481974	1.67078	0.74052	0.0624686	1	up	no
MSTRG.2427		MSTRG.2427.1	NA	NA	NA	NA		81.6972	49.1357	34.7349	41.9194	21.5518	43.5615	1.54689	0.62937	0.0625446	1	up	no
MSTRG.6253	LOC105384450;LOC105384478	XM_011554682.1;MSTRG.6253.1;XM_011554730.1	GO:0005634(nucleus);GO:0006334(nucleosome assembly);GO:0033186(CAF-1 complex)	NA	NA	NA	chromatin assembly factor 1 subunit A-like;DNA ligase 1-like	10.3956	9.675	5.23719	3.59149	8.80444	4.47068	1.50047	0.585413	0.0625669	1	up	no
MSTRG.7651	LOC105386139	XR_960688.1	NA	NA	NA	NA	uncharacterized LOC105386139	3.01955	1.54976	2.32613	1.14055	1.09977	1.43058	1.87841	0.909509	0.0625927	1	up	no
MSTRG.2992	LOC105380475	XM_011550043.1;MSTRG.2992.2	GO:0005215(transporter activity);GO:0005622(intracellular);GO:0006810(transport);GO:0008431(vitamin E binding)	NA	NA	NA	alpha-tocopherol transfer protein-like	12.1929	14.4964	9.58103	8.39303	11.4828	5.9678	1.40345	0.488981	0.0627298	1	up	no
MSTRG.9318	LOC105388169	XM_011559034.1;XM_011559035.1	GO:0003873(6-phosphofructo-2-kinase activity);GO:0004331(fructose-2,6-bisphosphate 2-phosphatase activity);GO:0005524(ATP binding);GO:0005737(cytoplasm);GO:0006000(fructose metabolic process);GO:0006003(fructose 2,6-bisphosphate metabolic process);GO:0006096(glycolytic process);GO:0007476(imaginal disc-derived wing morphogenesis);GO:0046835(carbohydrate phosphorylation);GO:0046835(carbohydrate ph…	00051(Fructose and mannose metabolism);00051(Fructose and mannose metabolism)	K01103	EC:2.7.1.105;EC:3.1.3.46	6-phosphofructo-2-kinase/fructose-2%2C6-bisphosphatase-like%2C transcript variant X1	7.09999	8.21803	10.3027	12.3807	18.2537	8.42765	0.655898	-0.608457	0.0627787	1	down	no
MSTRG.8999	LOC105387777	MSTRG.8999.1;XM_011558560.1	NA	NA	NA	NA	high mobility group nucleosome-binding domain-containing protein 5-like	4.89695	3.73974	3.44275	3.82522	2.06886	2.09716	1.51158	0.596062	0.0627819	1	up	no
MSTRG.9150		MSTRG.9150.1	NA	NA	NA	NA		5.43397	3.32638	4.1343	3.63937	1.83603	1.9528	1.7359	0.795688	0.0627957	1	up	no
MSTRG.14833	LOC105395142	XM_011567075.1	GO:0001540(beta-amyloid binding);GO:0072657(protein localization to membrane)	NA	NA	NA	uncharacterized LOC105395142	0.441146	0.763848	0.490415	1.09628	0.875264	1.05397	0.56037	-0.835548	0.0629823	1	down	no
MSTRG.1253	LOC105391629	XM_011563142.1	GO:0005215(transporter activity);GO:0016021(integral component of membrane);GO:0034220(ion transmembrane transport)	NA	NA	NA	monocarboxylate transporter 6-like	0.173056	2.18026	0.997908	3.25229	1.15485	3.40988	0.428708	-1.22193	0.0632505	1	down	no
MSTRG.11422	LOC105390902	XM_011562275.1	GO:0003676(nucleic acid binding);GO:0005829(cytosol);GO:0019233(sensory perception of pain);GO:0046872(metal ion binding);GO:0090278(negative regulation of peptide hormone secretion)	04722(Neurotrophin signaling pathway)	NA	NA	B-cell lymphoma/leukemia 11A-like	6.85264	5.79815	6.03799	3.68793	5.2405	4.72386	1.36891	0.453029	0.063369	1	up	no
MSTRG.5025	LOC105382901	MSTRG.5025.1	NA	NA	NA	NA		5.45531	3.42876	3.13055	2.6687	1.43544	2.98075	1.69581	0.761975	0.0635111	1	up	no
LOC105395758	LOC105395758	XM_011567721.1	GO:0000780(condensed nuclear chromosome, centromeric region);GO:0000922(spindle pole);GO:0003682(chromatin binding);GO:0005634(nucleus);GO:0005721(pericentric heterochromatin);GO:0007064(mitotic sister chromatid cohesion);GO:0008278(cohesin complex);GO:0016322(neuron remodeling);GO:0034990(nuclear mitotic cohesin complex);GO:0035327(transcriptionally active chromatin)	04110(Cell cycle)	NA	NA	cohesin subunit SA-1-like	0.325832	0.585868	0.703678	0.704796	1.64271	0.717328	0.527069	-0.923936	0.0635245	1	down	no
LOC105393463	LOC105393463	XM_011565268.1	GO:0000166(nucleotide binding);GO:0002066(columnar/cuboidal epithelial cell development);GO:0004672(protein kinase activity);GO:0004713(protein tyrosine kinase activity);GO:0004714(transmembrane receptor protein tyrosine kinase activity);GO:0005524(ATP binding);GO:0005886(plasma membrane);GO:0006468(protein phosphorylation);GO:0007283(spermatogenesis);GO:0008283(cell proliferation);GO:0009986(cel…	04013(MAPK signaling pathway - fly)	K05088	EC:2.7.10.1	proto-oncogene tyrosine-protein kinase ROS-like	0.337243	0.236638	0.256909	0.47528	0.509609	0.365945	0.61502	-0.701295	0.0636134	1	down	no
MSTRG.13596	LOC105393512	XM_011565287.1	GO:0005524(ATP binding);GO:0005737(cytoplasm);GO:0006605(protein targeting);GO:0006886(intracellular protein transport);GO:0015462(protein-transmembrane transporting ATPase activity);GO:0016020(membrane);GO:0017038(protein import)	NA	NA	NA	uncharacterized LOC105393512	0.581179	0.492218	0.459469	1.17161	0.94134	0.540028	0.57779	-0.791382	0.0637003	1	down	no
MSTRG.11121	LOC105390523	XM_011561838.1	GO:0004252(serine-type endopeptidase activity)	NA	NA	NA	protein pecanex-like	0.49399	0.53605	0.548928	0.740493	1.02473	0.647021	0.654563	-0.611396	0.0637376	1	down	no
MSTRG.4335	LOC105382137	XM_011551974.1	GO:0005829(cytosol);GO:0016618(hydroxypyruvate reductase activity);GO:0030267(glyoxylate reductase (NADP) activity)	00620(Pyruvate metabolism);00630(Glyoxylate and dicarboxylate metabolism);00260(Glycine, serine and threonine metabolism)	K00049	EC:1.1.1.79;EC:1.1.1.81	glyoxylate reductase/hydroxypyruvate reductase-like	6.94807	8.83769	6.55033	5.04884	4.97587	5.59796	1.42972	0.515735	0.0638404	1	up	no
MSTRG.5962		MSTRG.5962.1	NA	NA	NA	NA		5.84504	3.34545	3.23916	2.64528	2.33134	2.5127	1.65965	0.730878	0.0641361	1	up	no
MSTRG.12669		MSTRG.12669.1	NA	NA	NA	NA		8.93446	10.9316	5.71715	4.17331	7.25971	5.92722	1.47367	0.55941	0.0641922	1	up	no
MSTRG.2741		MSTRG.2741.1	NA	NA	NA	NA		3.85869	3.62693	4.29585	3.17901	2.83657	2.45339	1.39113	0.476261	0.0642184	1	up	no
MSTRG.2915	LOC105380386	XM_011549921.1;XM_011549922.1	GO:0005575(cellular_component);GO:0005634(nucleus);GO:0008150(biological_process);GO:0008270(zinc ion binding);GO:0016788(hydrolase activity, acting on ester bonds);GO:0016788(hydrolase activity, acting on ester bonds)	NA	NA	NA	ester hydrolase C11orf54 homolog%2C transcript variant X2	6.93475	10.9807	8.09813	11.7834	12.849	13.6264	0.679935	-0.556531	0.0642263	1	down	no
MSTRG.2086	LOC105398319	XM_011570393.1;MSTRG.2086.4;MSTRG.2086.3;MSTRG.2086.2	NA	NA	NA	NA	uncharacterized LOC105398319	7.62597	6.37562	5.90868	6.01038	3.90151	4.85251	1.34853	0.431391	0.0642583	1	up	no
MSTRG.13002	LOC105392823	XM_011564505.1;MSTRG.13002.2	GO:0000977(RNA polymerase II regulatory region sequence-specific DNA binding);GO:0003682(chromatin binding);GO:0003712(transcription cofactor activity);GO:0005634(nucleus);GO:0006355(regulation of transcription, DNA-templated);GO:0008270(zinc ion binding);GO:0042393(histone binding);GO:0046872(metal ion binding)	NA	NA	NA	uncharacterized LOC105392823	8.87122	1.46257	1.33146	8.48316	8.2968	7.83908	0.473831	-1.07756	0.0644732	1	down	no
MSTRG.1538		MSTRG.1538.1	NA	NA	NA	NA		3.15214	5.11502	3.49793	5.4658	6.42216	6.48736	0.640265	-0.643258	0.0644978	1	down	no
MSTRG.12604	LOC105392320	XM_011563929.1;MSTRG.12604.7;XM_011563928.1;XM_011563927.1;MSTRG.12604.5;XM_011563925.1;XM_011563930.1	GO:0003993(acid phosphatase activity);GO:0005575(cellular_component);GO:0008150(biological_process);GO:0046872(metal ion binding);GO:0046872(metal ion binding)	00790(Folate biosynthesis);00790(Folate biosynthesis)	NA	NA	iron/zinc purple acid phosphatase-like protein%2C transcript variant X6	15.6916	15.3479	15.3978	27.6183	28.1327	13.3678	0.671848	-0.573792	0.064504	1	down	no
MSTRG.10647	LOC105389908	XM_011561111.1	NA	NA	NA	NA	uncharacterized LOC105389908	1.9062	1.95549	2.09291	1.16451	1.3859	1.41131	1.50303	0.587877	0.064561	1	up	no
MSTRG.10702		MSTRG.10702.1	NA	NA	NA	NA		7.19628	4.28386	3.90345	2.82635	3.32219	3.84465	1.53941	0.622376	0.0647904	1	up	no
MSTRG.2633	LOC105380039	XM_011549523.1	GO:0004181(metallocarboxypeptidase activity);GO:0005615(extracellular space)	04614(Renin-angiotensin system);04972(Pancreatic secretion);04974(Protein digestion and absorption)	NA	NA	carboxypeptidase B-like	2.67183	1.94587	2.9482	1.97314	1.24514	1.71678	1.53309	0.616445	0.0648371	1	up	no
MSTRG.3830		MSTRG.3830.1	NA	NA	NA	NA		4.55868	2.81178	2.29915	2.31046	0.977406	2.0111	1.82481	0.867748	0.0650158	1	up	no
MSTRG.4541	LOC105382341	XM_011552201.1	NA	NA	NA	NA	uncharacterized LOC105382341	8.53104	7.61002	6.41	4.51299	3.83014	6.03075	1.56889	0.649746	0.0650231	1	up	no
MSTRG.6015	LOC105384181	MSTRG.6015.1	NA	NA	NA	NA		9.57521	4.50906	6.08812	3.67061	6.00692	3.03775	1.58647	0.665819	0.0650498	1	up	no
MSTRG.5835	LOC105383951	XM_011554092.1	GO:0004252(serine-type endopeptidase activity);GO:0006508(proteolysis);GO:0008236(serine-type peptidase activity);GO:0009620(response to fungus);GO:0048812(neuron projection morphogenesis)	00230(Purine metabolism)	NA	NA	venom protease-like	0.253125	1.62837	0.384646	2.05009	1.90382	1.1316	0.445608	-1.16615	0.0650767	1	down	no
MSTRG.4303	LOC105382078	XM_011551902.1	GO:0005739(mitochondrion);GO:0005811(lipid particle);GO:0005875(microtubule associated complex);GO:0006457(protein folding);GO:0008340(determination of adult lifespan);GO:0009408(response to heat);GO:0022008(neurogenesis);GO:0031427(response to methotrexate);GO:0042594(response to starvation);GO:0051082(unfolded protein binding)	03040(Spliceosome);04141(Protein processing in endoplasmic reticulum);04144(Endocytosis);04213(Longevity regulating pathway - multiple species)	K03283	NA	heat shock 70 kDa protein 1B	2.67437	2.06059	1.46601	1.78113	0.781108	1.17421	1.65959	0.730825	0.0650903	1	up	no
MSTRG.10399	LOC105389562	XM_011560694.1	GO:0004129(cytochrome-c oxidase activity);GO:0005743(mitochondrial inner membrane);GO:0006784(heme a biosynthetic process);GO:0008535(respiratory chain complex IV assembly);GO:0016653(oxidoreductase activity, acting on NAD(P)H, heme protein as acceptor)	00190(Oxidative phosphorylation);00860(Porphyrin and chlorophyll metabolism)	K02259	NA	cytochrome c oxidase assembly protein COX15 homolog	2.23557	4.23852	3.91051	5.15773	5.7132	5.03496	0.652878	-0.615116	0.065168	1	down	no
MSTRG.11017	LOC105390372	MSTRG.11017.1	NA	NA	NA	NA		5.86109	5.41856	5.26141	4.48749	1.27677	4.25185	1.65144	0.723729	0.0652409	1	up	no
MSTRG.13092	LOC105392922	XM_011564611.1	NA	NA	K03006	EC:2.7.7.6	extensin-like	1.9917	3.38908	2.70906	4.12045	4.01795	4.2541	0.652801	-0.615284	0.0652554	1	down	no
LOC105389312	LOC105389312	XM_011560414.1	NA	NA	NA	NA	outer dense fiber protein 3-like protein 2	1.72026	1.02577	0.72667	0.626348	0.458401	0.793279	1.84912	0.88684	0.0653483	1	up	no
LOC105387146	LOC105387146	XM_011557830.1	GO:0010470(regulation of gastrulation);GO:0010717(regulation of epithelial to mesenchymal transition);GO:0045180(basal cortex);GO:0070507(regulation of microtubule cytoskeleton organization)	04141(Protein processing in endoplasmic reticulum)	NA	NA	homeobox protein 12-like	0.56052	0.968021	1.10462	1.14367	1.71365	1.53136	0.59999	-0.736991	0.0654085	1	down	no
MSTRG.6779	LOC105385091	XM_011555405.1	NA	NA	NA	NA	uncharacterized LOC105385091	21.8915	20.4656	13.185	16.2043	6.46415	13.0909	1.55322	0.635263	0.0654396	1	up	no
MSTRG.2598	LOC105380078	MSTRG.2598.1	NA	NA	NA	NA		3.60014	3.19629	5.60494	2.96485	2.45676	2.69949	1.52706	0.610754	0.0656034	1	up	no
MSTRG.14339	LOC105394432	MSTRG.14339.1	NA	NA	NA	NA		5.9187	5.69608	3.58407	3.91431	3.00114	2.73974	1.57416	0.654586	0.0656302	1	up	no
MSTRG.1599	LOC105396452	MSTRG.1599.1;XM_011568457.1	GO:0000977(RNA polymerase II regulatory region sequence-specific DNA binding);GO:0001228(transcriptional activator activity, RNA polymerase II transcription regulatory region sequence-specific binding);GO:0005634(nucleus);GO:0006366(transcription from RNA polymerase II promoter);GO:0006851(mitochondrial calcium ion transport);GO:0007030(Golgi organization);GO:0007186(G-protein coupled receptor si…	04950(Maturity onset diabetes of the young)	NA	NA	neurogenin-2	3.55058	3.49573	4.4136	4.91335	7.16024	4.98645	0.67174	-0.574025	0.0656843	1	down	no
LOC105389527	LOC105389527	XM_011560655.1	GO:0008270(zinc ion binding);GO:0016021(integral component of membrane)	03040(Spliceosome)	K10264	NA	RING finger and transmembrane domain-containing protein 2	0.85184	1.13936	0.759611	1.72811	1.17288	1.67639	0.600957	-0.734667	0.0656855	1	down	no
MSTRG.3016	LOC105380494	MSTRG.3016.1	NA	NA	NA	NA		6.94783	0.861515	1.58843	0.245573	2.38349	1.27477	2.40732	1.26743	0.0656899	1	up	no
MSTRG.12431	LOC105392100	XM_011563694.1	GO:0006629(lipid metabolic process);GO:0016788(hydrolase activity, acting on ester bonds)	00100(Steroid biosynthesis);04142(Lysosome)	NA	NA	lipase 3-like	3.71052	1.86431	9.20032	1.28234	2.63939	3.87282	1.89558	0.922636	0.065817	1	up	no
MSTRG.6309	LOC105384514	MSTRG.6309.2;XM_011554769.1	NA	NA	NA	NA	uncharacterized LOC105384514	3.77465	1.27161	1.08151	3.02259	3.90278	3.7775	0.572536	-0.804563	0.0658545	1	down	no
LOC105386350	LOC105386350	XM_011556880.1	GO:0008028(monocarboxylic acid transmembrane transporter activity);GO:0015718(monocarboxylic acid transport);GO:0016021(integral component of membrane)	05230(Central carbon metabolism in cancer)	NA	NA	uncharacterized LOC105386350	0.714377	0.558873	0.750583	0.518659	0.381321	0.354061	1.61385	0.690506	0.0658869	1	up	no
MSTRG.307	LOC105398810	XM_011571046.1;XM_011571036.1;MSTRG.307.2;XM_011571054.1	NA	NA	NA	NA	uncharacterized LOC105398810%2C transcript variant X2	37.5771	23.3201	23.8458	22.3211	15.5171	23.2834	1.38647	0.471411	0.0659019	1	up	no
MSTRG.14279	LOC105394351	XM_011566239.1	GO:0003674(molecular_function);GO:0005634(nucleus);GO:0005737(cytoplasm);GO:0008150(biological_process)	NA	NA	NA	DDB1- and CUL4-associated factor 8-like	3.07588	5.4456	4.51429	5.41894	9.06499	5.77409	0.643487	-0.636018	0.0660072	1	down	no
MSTRG.1891	LOC105398068	XM_011570121.1;XR_961182.1;XM_011570120.1;XR_961185.1;XR_961184.1;XR_961180.1;XR_961183.1;XR_961181.1	GO:0003674(molecular_function);GO:0005575(cellular_component);GO:0008150(biological_process);GO:0008150(biological_process)	NA	NA	NA	desumoylating isopeptidase 2%2C transcript variant X5	9.67215	10.9999	8.12138	13.5209	14.0745	12.4914	0.718276	-0.47739	0.0660846	1	down	no
MSTRG.15421	LOC105396173	XM_011568159.1	GO:0000030(mannosyltransferase activity);GO:0005637(nuclear inner membrane);GO:0018406(protein C-linked glycosylation via 2'-alpha-mannosyl-L-tryptophan)	04080(Neuroactive ligand-receptor interaction);04810(Regulation of actin cytoskeleton)	K20674	EC:3.4.21.-	probable C-mannosyltransferase DPY19L1	0.662096	0.388337	0.43979	0.746761	0.973487	0.799987	0.591303	-0.75803	0.0661247	1	down	no
MSTRG.743	LOC105385963	XM_011556436.1	NA	NA	NA	NA	uncharacterized LOC105385963	7.03475	5.57429	5.73603	5.14387	3.4795	4.68426	1.37854	0.463139	0.0661851	1	up	no
MSTRG.9786	LOC105388769	XM_011559732.1	NA	NA	NA	NA	uncharacterized LOC105388769	15.3081	11.6246	7.83717	10.3154	6.13564	7.30981	1.46332	0.549248	0.0662297	1	up	no
MSTRG.2570	LOC105380000	XM_011549477.1	NA	NA	NA	NA	anucleate primary sterigmata protein B	1.53281	3.01764	3.33747	3.32506	5.94158	3.61052	0.612551	-0.707098	0.066312	1	down	no
MSTRG.1542		MSTRG.1542.1	NA	NA	NA	NA		9.05965	4.92804	5.62336	4.79559	3.82311	4.66961	1.47581	0.561508	0.0664339	1	up	no
MSTRG.3728	LOC105381367	XM_011551076.1;XM_011551075.1	GO:0005793(endoplasmic reticulum-Golgi intermediate compartment);GO:0005801(cis-Golgi network);GO:0006506(GPI anchor biosynthetic process);GO:0006888(ER to Golgi vesicle-mediated transport);GO:0008081(phosphoric diester hydrolase activity);GO:0030145(manganese ion binding);GO:0034235(GPI anchor binding);GO:0070971(endoplasmic reticulum exit site);GO:0070971(endoplasmic reticulum exit site)	NA	K02737	EC:3.4.25.1	metallophosphoesterase 1-like%2C transcript variant X1	1.28922	0.717733	1.17986	0.88283	0.554746	0.36521	1.76771	0.821884	0.0666797	1	up	no
MSTRG.7458	LOC105385893	XM_011556341.1;MSTRG.7458.1	NA	NA	NA	NA	uncharacterized LOC105385893	47.3752	38.9371	37.763	27.4139	34.8699	32.6978	1.30631	0.385496	0.0667091	1	up	no
MSTRG.11758	LOC105391302	XM_011562766.1	NA	NA	NA	NA	uncharacterized LOC105391302	5.32095	4.72032	3.19669	3.46613	2.40673	3.24947	1.45116	0.537206	0.0667759	1	up	no
MSTRG.1814	LOC105397953	XM_011569980.1	GO:0004084(branched-chain-amino-acid transaminase activity);GO:0005737(cytoplasm);GO:0005739(mitochondrion);GO:0009082(branched-chain amino acid biosynthetic process)	01210(2-Oxocarboxylic acid metabolism);01230(Biosynthesis of amino acids);00270(Cysteine and methionine metabolism);00280(Valine, leucine and isoleucine degradation);00290(Valine, leucine and isoleucine biosynthesis);00770(Pantothenate and CoA biosynthesis)	K00826	EC:2.6.1.42	branched-chain-amino-acid aminotransferase%2C cytosolic	15.5103	15.4583	20.52	26.4458	23.7504	22.2991	0.710234	-0.493634	0.0669396	1	down	no
MSTRG.3300	LOC105380858	XM_011550464.1	NA	NA	NA	NA	uncharacterized LOC105380858	21.4613	17.2593	12.5038	13.0845	8.0081	14.3141	1.44674	0.532807	0.0670713	1	up	no
MSTRG.8414		MSTRG.8414.1	NA	NA	NA	NA		5.21331	3.96667	5.38162	4.5974	2.05623	2.54003	1.58387	0.663458	0.0672311	1	up	no
MSTRG.1543		MSTRG.1543.1	NA	NA	NA	NA		9.05965	4.90801	5.62336	4.79559	3.82311	4.66961	1.4743	0.560034	0.0674865	1	up	no
MSTRG.8822	LOC105387537	XM_011558270.1	GO:0003674(molecular_function);GO:0005575(cellular_component);GO:0008150(biological_process)	NA	NA	NA	uncharacterized LOC105387537	3.85968	5.35674	7.71037	9.5308	9.97488	6.96435	0.63947	-0.645051	0.0675398	1	down	no
MSTRG.3065	LOC105380551	XM_011550130.1	GO:0003735(structural constituent of ribosome);GO:0006412(translation)	04020(Calcium signaling pathway);04022(cGMP - PKG signaling pathway);05012(Parkinson's disease);05016(Huntington's disease);05166(HTLV-I infection)	NA	NA	putative tricarboxylate transport protein%2C mitochondrial	26.9371	35.8902	32.6097	45.4352	38.01	49.7669	0.716428	-0.481106	0.0676759	1	down	no
MSTRG.2475	LOC105398742	XM_011570962.1	GO:0000774(adenyl-nucleotide exchange factor activity);GO:0005739(mitochondrion);GO:0005759(mitochondrial matrix);GO:0006457(protein folding);GO:0006626(protein targeting to mitochondrion);GO:0022008(neurogenesis);GO:0042803(protein homodimerization activity);GO:0051082(unfolded protein binding);GO:0051087(chaperone binding)	NA	NA	NA	grpE protein homolog%2C mitochondrial-like	4.46649	7.81288	4.68116	8.3182	8.80028	8.60115	0.659439	-0.600689	0.0677203	1	down	no
MSTRG.12470	LOC105392146	XM_011563741.1	NA	NA	NA	NA	cuticle protein 16.5%2C isoform B-like	104.616	312.9	244.103	424.177	252.503	379.357	0.626511	-0.674588	0.0677745	1	down	no
MSTRG.761	LOC105386887	XM_011557539.1	GO:0004181(metallocarboxypeptidase activity);GO:0005615(extracellular space)	04972(Pancreatic secretion);04974(Protein digestion and absorption)	NA	NA	zinc carboxypeptidase A 1-like	6.79612	4.89308	4.16338	4.14923	3.4129	3.81284	1.39364	0.478856	0.0678455	1	up	no
MSTRG.5822	LOC105383972	XM_011554110.1	NA	NA	NA	NA	uncharacterized LOC105383972	37.29	25.2549	24.0457	22.2988	16.947	23.763	1.37426	0.458654	0.0679409	1	up	no
MSTRG.12608	LOC105392324	XM_011563935.1	GO:0007605(sensory perception of sound)	NA	NA	NA	uncharacterized LOC105392324	9.86807	10.1184	8.66024	14.8382	18.6105	8.73466	0.679101	-0.558303	0.0679552	1	down	no
MSTRG.4542	LOC105382409	XM_011552286.1	GO:0004672(protein kinase activity);GO:0004674(protein serine/threonine kinase activity);GO:0005524(ATP binding);GO:0005575(cellular_component);GO:0006468(protein phosphorylation)	04922(Glucagon signaling pathway)	NA	NA	testis-specific serine/threonine-protein kinase 2-like	47.978	35.1949	32.4961	34.1399	24.7775	27.4283	1.3396	0.421806	0.0680911	1	up	no
MSTRG.5703	LOC105383807	XM_011553922.1	NA	NA	NA	NA	craniofacial development protein 2-like	0.833983	0.771885	1.00428	0.713289	2.52904	1.73973	0.52391	-0.93261	0.0684414	1	down	no
LOC105390862	LOC105390862	XM_011562227.1	GO:0004129(cytochrome-c oxidase activity);GO:0005751(mitochondrial respiratory chain complex IV);GO:0006123(mitochondrial electron transport, cytochrome c to oxygen)	00190(Oxidative phosphorylation)	K02263	NA	cytochrome c oxidase subunit 4 isoform 1%2C mitochondrial-like	3.54621	2.94641	1.98759	2.31025	1.69989	0.890754	1.73034	0.791053	0.0684803	1	up	no
MSTRG.1377		MSTRG.1377.1	NA	NA	NA	NA		2.2176	1.37499	0.722416	2.48028	3.18234	3.24352	0.484498	-1.04544	0.0685126	1	down	no
MSTRG.12031	LOC105391626	XM_011563131.1	NA	NA	NA	NA	uncharacterized LOC105391626	26.9154	16.4946	19.8764	16.6603	10.2567	17.4404	1.42674	0.512723	0.0685725	1	up	no
LOC105398448	LOC105398448	XM_011570557.1	GO:0000703(oxidized pyrimidine nucleobase lesion DNA N-glycosylase activity);GO:0004844(uracil DNA N-glycosylase activity);GO:0031981(nuclear lumen)	03410(Base excision repair)	K10800	EC:3.2.2.-	single-strand selective monofunctional uracil DNA glycosylase	2.92963	2.66508	1.47043	1.50629	1.73404	1.3942	1.52446	0.608297	0.0686315	1	up	no
LOC105383334	LOC105383334	XM_011553372.1	GO:0005044(scavenger receptor activity);GO:0006909(phagocytosis);GO:0006910(phagocytosis, recognition);GO:0006955(immune response);GO:0009986(cell surface);GO:0010811(positive regulation of cell-substrate adhesion);GO:0016021(integral component of membrane);GO:0042742(defense response to bacterium);GO:0042834(peptidoglycan binding);GO:0046331(lateral inhibition);GO:0050766(positive regulation of …	04512(ECM-receptor interaction)	NA	NA	uncharacterized LOC105383334	0.304889	0.615674	0.399751	0.713557	0.784136	0.633437	0.619537	-0.690738	0.0686573	1	down	no
MSTRG.2959	LOC105380422	XM_011549978.1	GO:0003674(molecular_function);GO:0005575(cellular_component);GO:0008150(biological_process)	NA	NA	NA	neuferricin homolog	34.5309	25.5848	21.7378	18.8198	25.2043	16.3848	1.35499	0.438283	0.0686687	1	up	no
MSTRG.2337		MSTRG.2337.1	NA	NA	NA	NA		6.56658	4.68039	3.79361	2.6553	3.35457	2.83624	1.70025	0.765744	0.0689118	1	up	no
MSTRG.9353	LOC105388217	MSTRG.9353.1	NA	NA	NA	NA		7.20692	2.38057	5.42876	3.07943	2.52827	2.67832	1.81224	0.857773	0.068954	1	up	no
MSTRG.12297	LOC105391943	XM_011563517.1	NA	NA	NA	NA	uncharacterized LOC105391943	54.3481	36.5514	33.0442	31.7559	20.9853	33.9637	1.42949	0.515501	0.0689786	1	up	no
MSTRG.726	LOC105385351	XM_011555714.1	GO:0003676(nucleic acid binding);GO:0003700(transcription factor activity, sequence-specific DNA binding);GO:0046872(metal ion binding)	03010(Ribosome)	NA	NA	GDNF-inducible zinc finger protein 1-like	4.22818	3.85845	2.98155	2.71449	2.34384	2.69265	1.42797	0.513965	0.0689828	1	up	no
MSTRG.15682	LOC105396791	XM_011568798.1;XM_011568799.1	GO:0003674(molecular_function);GO:0005575(cellular_component);GO:0019233(sensory perception of pain);GO:0019233(sensory perception of pain)	04145(Phagosome);04145(Phagosome)	NA	NA	protein app1-like%2C transcript variant X1	4.18928	4.21202	5.3398	1.73771	3.43247	4.15678	1.47327	0.559019	0.0690367	1	up	no
MSTRG.293	LOC105380439	XM_011550010.1	GO:0005096(GTPase activator activity);GO:0005634(nucleus);GO:0005737(cytoplasm);GO:0007615(anesthesia-resistant memory);GO:0008016(regulation of heart contraction);GO:0008270(zinc ion binding);GO:0008355(olfactory learning);GO:0030424(axon);GO:0043025(neuronal cell body);GO:0051056(regulation of small GTPase mediated signal transduction)	04015(Rap1 signaling pathway)	K17700	NA	uncharacterized LOC105380439	0.213883	0.566856	0.336726	0.253656	0.194915	0.193904	1.73931	0.798517	0.0690698	1	up	no
MSTRG.14387	LOC105394486	MSTRG.14387.1	NA	NA	NA	NA		2.38741	5.14545	5.01334	6.17524	7.22165	6.06208	0.644751	-0.633185	0.0695591	1	down	no
MSTRG.11439	LOC105390933	MSTRG.11439.1	NA	NA	NA	NA		0	2.21581	1.78985	3.69553	3.78303	3.42649	0.367322	-1.44488	0.0695593	1	down	no
MSTRG.14941	LOC105395346	XM_011567299.1	GO:0000166(nucleotide binding);GO:0003824(catalytic activity);GO:0003989(acetyl-CoA carboxylase activity);GO:0004075(biotin carboxylase activity);GO:0005524(ATP binding);GO:0006633(fatty acid biosynthetic process);GO:0016874(ligase activity);GO:0046872(metal ion binding)	01212(Fatty acid metabolism);00620(Pyruvate metabolism);00640(Propanoate metabolism);00061(Fatty acid biosynthesis);00254(Aflatoxin)	K11262	EC:6.4.1.2;EC:6.3.4.14	acetyl-CoA carboxylase-like	1.15664	2.02942	2.35619	2.92544	2.45279	3.43085	0.629153	-0.668518	0.0696454	1	down	no
MSTRG.5601	LOC105383645	XM_011553731.1	GO:0003674(molecular_function);GO:0005575(cellular_component);GO:0005737(cytoplasm);GO:0005856(cytoskeleton);GO:0008150(biological_process)	NA	NA	NA	coiled-coil domain-containing protein 96-like%2C transcript variant X1	2.3663	1.65994	1.84115	1.58504	0.961229	1.39559	1.48848	0.573844	0.069777	1	up	no
MSTRG.8557	LOC105387242	MSTRG.8557.1	NA	NA	NA	NA		2.48692	3.19546	3.29853	4.53285	5.81036	5.26338	0.575456	-0.797223	0.0698605	1	down	no
MSTRG.15099	LOC105395572	XM_011567521.1	GO:0032324(molybdopterin cofactor biosynthetic process);GO:0061597(cyclic pyranopterin monophosphate synthase activity)	00790(Folate biosynthesis);04122(Sulfur relay system)	K20967	EC:4.1.99.22;EC:4.6.1.17	molybdenum cofactor biosynthesis protein 1-like	1.72954	1.84777	2.93692	6.2919	2.45537	4.14284	0.505367	-0.984596	0.069882	1	down	no
MSTRG.4681	LOC105382504	MSTRG.4681.3;XM_011552397.1;MSTRG.4681.2	GO:0002218(activation of innate immune response);GO:0005634(nucleus);GO:0005737(cytoplasm);GO:0007476(imaginal disc-derived wing morphogenesis);GO:0050829(defense response to Gram-negative bacterium);GO:2000648(positive regulation of stem cell proliferation)	03018(RNA degradation)	NA	NA	nuclear receptor coactivator 7-like	3.75581	4.70819	6.62625	7.16852	8.71971	6.60353	0.670923	-0.57578	0.0699507	1	down	no
MSTRG.12346	LOC105392012	MSTRG.12346.1	NA	NA	NA	NA		31.7074	20.556	18.4716	15.5412	15.2179	19.7345	1.40087	0.486326	0.0701059	1	up	no
LOC105386906	LOC105386906	XM_011557559.1	GO:0030155(regulation of cell adhesion);GO:0061630(ubiquitin protein ligase activity)	NA	NA	NA	uncharacterized LOC105386906	0.477719	0.728409	0.369772	1.65494	1.31939	0.447276	0.460573	-1.1185	0.0702187	1	down	no
MSTRG.6008	LOC105384178	MSTRG.6008.1	NA	NA	NA	NA		14.4024	6.49141	11.6592	6.03288	5.55871	9.15399	1.56915	0.649986	0.0704635	1	up	no
LOC105381863	LOC105381863	XR_960500.1	NA	NA	K00728	EC:2.4.1.109	uncharacterized LOC105381863	3.70798	3.74285	3.15248	2.93312	2.43809	1.96181	1.44597	0.532035	0.0705006	1	up	no
MSTRG.1736	LOC105397284	XM_011569305.1	NA	NA	NA	NA	uncharacterized LOC105397284	17.7141	13.8229	13.0336	11.6358	8.45699	11.8001	1.39751	0.482856	0.0706062	1	up	no
MSTRG.13714	LOC105393668	XM_011565462.1;XM_011565463.1	NA	NA	NA	NA	cysteine and glycine-rich protein 3-like%2C transcript variant X2	24.2548	15.3089	15.0052	14.2202	8.48002	14.9763	1.44836	0.534415	0.0707119	1	up	no
LOC105393170	LOC105393170	XM_011564908.1	GO:0016020(membrane)	04014(Ras signaling pathway)	NA	NA	leucine-rich repeat-containing protein 40-like	0.672508	0.884137	0.724868	1.02239	1.16283	1.56784	0.607908	-0.718075	0.0708589	1	down	no
MSTRG.10037	LOC105389084	XM_011560148.1	NA	00510(N-Glycan biosynthesis)	K00736	EC:2.4.1.143	alpha-1%2C6-mannosyl-glycoprotein 2-beta-N-acetylglucosaminyltransferase-like	12.8995	10.8698	8.41271	6.74697	6.29719	9.51841	1.42634	0.512321	0.0712131	1	up	no
MSTRG.5170	LOC105383092	XM_011553104.1	GO:0003924(GTPase activity);GO:0005200(structural constituent of cytoskeleton);GO:0005525(GTP binding);GO:0005737(cytoplasm);GO:0005874(microtubule);GO:0007017(microtubule-based process)	04145(Phagosome)	K07374	NA	tubulin alpha-3 chain-like	24.0951	18.3455	17.0392	13.632	19.1548	11.4125	1.34572	0.428377	0.0712589	1	up	no
MSTRG.13659	LOC105393606	MSTRG.13659.1;XM_011565393.1	GO:0004642(phosphoribosylformylglycinamidine synthase activity);GO:0005524(ATP binding);GO:0005737(cytoplasm);GO:0006164(purine nucleotide biosynthetic process);GO:0006541(glutamine metabolic process);GO:0009156(ribonucleoside monophosphate biosynthetic process)	00230(Purine metabolism)	K01952	EC:6.3.5.3	phosphoribosylformylglycinamidine synthase	3.73912	6.56737	5.53113	7.69728	7.56835	7.58161	0.693196	-0.528664	0.0713482	1	down	no
LOC105396218	LOC105396218	XM_011568203.1	GO:0004672(protein kinase activity);GO:0004674(protein serine/threonine kinase activity);GO:0005524(ATP binding);GO:0005634(nucleus);GO:0005737(cytoplasm);GO:0006468(protein phosphorylation);GO:0010906(regulation of glucose metabolic process);GO:0019233(sensory perception of pain)	04922(Glucagon signaling pathway)	NA	NA	uncharacterized LOC105396218	1.13902	1.07658	1.27562	1.06219	0.683103	0.657065	1.45324	0.539277	0.0713502	1	up	no
MSTRG.13636	LOC105393554	MSTRG.13636.1;XM_011565337.1	GO:0016810(hydrolase activity, acting on carbon-nitrogen (but not peptide) bonds)	00770(Pantothenate and CoA biosynthesis)	K01435	EC:3.5.1.12	vanin-like protein 1%2C transcript variant X1	15.2432	17.0824	14.8196	20.9663	23.118	20.519	0.729765	-0.454496	0.0713616	1	down	no
MSTRG.11589	LOC105391102	XM_011562514.1	NA	NA	NA	NA	uncharacterized LOC105391102	10.3023	5.98385	5.50719	6.39874	3.32872	4.79314	1.50086	0.585786	0.0714613	1	up	no
LOC105387817	LOC105387817	XM_011558600.1	GO:0003723(RNA binding);GO:0003964(RNA-directed DNA polymerase activity);GO:0005737(cytoplasm);GO:0006278(RNA-dependent DNA biosynthetic process);GO:0015074(DNA integration)	03015(mRNA surveillance pathway)	NA	NA	uncharacterized protein K02A2.6-like	0.111962	0.194879	0.09246	0.259359	0.624244	0.078195	0.415161	-1.26826	0.0715889	1	down	no
MSTRG.8431	LOC105387096	XM_011557772.1	NA	NA	NA	NA	uncharacterized LOC105387096	1.15692	0.957495	0.762128	0.914008	0.501609	0.526218	1.48135	0.566913	0.0716797	1	up	no
LOC105382159	LOC105382159	XM_011551999.1	NA	NA	NA	NA	uncharacterized LOC105382159	0.980817	0.950144	1.28046	2.32068	2.91603	1.02582	0.5128	-0.963533	0.0717091	1	down	no
MSTRG.11609	LOC105391120	XM_011562540.1	GO:0009809(lignin biosynthetic process);GO:0016020(membrane);GO:0016709(oxidoreductase activity, acting on paired donors, with incorporation or reduction of molecular oxygen, NAD(P)H as one donor, and incorporation of one atom of oxygen)	00120(Primary bile acid biosynthesis);03320(PPAR signaling pathway)	NA	NA	25-hydroxyvitamin D-1 alpha hydroxylase%2C mitochondrial-like	3.58224	4.5328	4.05996	7.11869	6.26577	4.54425	0.679078	-0.558351	0.0717328	1	down	no
MSTRG.15415		MSTRG.15415.1	NA	NA	NA	NA		13.0984	12.994	11.217	17.72	18.3349	16.7782	0.706175	-0.501903	0.0718209	1	down	no
MSTRG.13366	LOC105393261	XM_011564994.1;XM_011564995.1	GO:0005044(scavenger receptor activity);GO:0005887(integral component of plasma membrane);GO:0006952(defense response);GO:0016020(membrane);GO:0035071(salivary gland cell autophagic cell death);GO:0048102(autophagic cell death);GO:0048102(autophagic cell death)	04142(Lysosome);04142(Lysosome)	K13885	NA	lysosome membrane protein 2-like%2C transcript variant X2	1.90696	2.99901	2.5522	3.48992	4.12541	3.42108	0.675779	-0.565377	0.071993	1	down	no
MSTRG.1164	LOC105390898	MSTRG.1164.1	NA	NA	NA	NA		5.38573	2.04559	2.79493	2.2733	1.97108	2.0971	1.6126	0.689387	0.0719955	1	up	no
MSTRG.326	LOC105380075	XM_011549574.1	NA	NA	NA	NA	uncharacterized LOC105380075	20.2682	11.7616	10.5323	11.4193	6.33329	11.0266	1.47892	0.564542	0.0720874	1	up	no
MSTRG.13109	LOC105392945	XM_011564637.1	GO:0004149(dihydrolipoyllysine-residue succinyltransferase activity);GO:0005634(nucleus);GO:0005739(mitochondrion);GO:0005886(plasma membrane);GO:0006099(tricarboxylic acid cycle);GO:0006103(2-oxoglutarate metabolic process);GO:0006734(NADH metabolic process);GO:0008152(metabolic process);GO:0016020(membrane);GO:0016740(transferase activity);GO:0016746(transferase activity, transferring acyl grou…	01200(Carbon metabolism);00020(Citrate cycle (TCA cycle));00310(Lysine degradation)	K00658	EC:2.3.1.61	dihydrolipoyllysine-residue succinyltransferase component of 2-oxoglutarate dehydrogenase complex%2C mitochondrial-like	7.0392	5.78388	4.04186	5.4142	2.10145	3.43508	1.54007	0.622999	0.0721611	1	up	no
LOC105383131	LOC105383131	XM_011553147.1	GO:0005783(endoplasmic reticulum);GO:0008270(zinc ion binding);GO:0018345(protein palmitoylation);GO:0019706(protein-cysteine S-palmitoyltransferase activity)	NA	NA	NA	palmitoyltransferase ZDHHC22-like	2.22478	1.73265	1.05426	1.11486	0	0.689055	2.77823	1.47417	0.0725289	1	up	no
LOC105385070	LOC105385070	XM_011555384.1	GO:0004672(protein kinase activity);GO:0004674(protein serine/threonine kinase activity);GO:0004702(receptor signaling protein serine/threonine kinase activity);GO:0005524(ATP binding);GO:0005737(cytoplasm);GO:0006468(protein phosphorylation);GO:0006915(apoptotic process);GO:0007030(Golgi organization);GO:0007254(JNK cascade);GO:0008349(MAP kinase kinase kinase kinase activity);GO:0008361(regulat…	04010(MAPK signaling pathway)	NA	NA	mitogen-activated protein kinase kinase kinase kinase 3-like	0.175183	0.338089	0.134133	0.216831	0.734286	0.365519	0.491711	-1.02412	0.0725981	1	down	no
MSTRG.4649	LOC105382451	XM_011552335.1;XM_011552336.1;XM_011552337.1	GO:0004471(malate dehydrogenase (decarboxylating) (NAD+) activity);GO:0004473(malate dehydrogenase (decarboxylating) (NADP+) activity);GO:0005829(cytosol);GO:0006108(malate metabolic process);GO:0008340(determination of adult lifespan);GO:0010941(regulation of cell death);GO:0030431(sleep);GO:0051287(NAD binding);GO:0055114(oxidation-reduction process);GO:0055114(oxidation-reduction process)	01200(Carbon metabolism);00620(Pyruvate metabolism);00620(Pyruvate metabolism)	K00029	EC:1.1.1.40	NADP-dependent malic enzyme%2C transcript variant X3	42.6158	71.0271	44.3455	76.4393	70.5243	74.8005	0.712417	-0.489207	0.0726784	1	down	no
LOC105392016	LOC105392016	XR_960964.1	GO:0003676(nucleic acid binding)	NA	NA	NA	uncharacterized LOC105392016	1.12736	0.949993	0.958878	1.5858	1.47151	1.42491	0.677395	-0.561932	0.0726975	1	down	no
MSTRG.6797	LOC105385099	XM_011555421.1	NA	NA	NA	NA	repetitive proline-rich cell wall protein 1-like	33.0885	48.8414	80.984	35.1211	29.897	45.8968	1.46882	0.554655	0.072749	1	up	no
MSTRG.9904	LOC105388902	XM_011559940.1	NA	NA	NA	NA	uncharacterized LOC105388902	4.98634	3.53459	2.65706	3.29257	1.72751	2.52883	1.48074	0.566319	0.0728228	1	up	no
MSTRG.670	LOC105385505	MSTRG.670.1	NA	NA	NA	NA		144.629	96.4277	76.4941	79.7541	95.7892	59.1905	1.35281	0.435963	0.0730221	1	up	no
MSTRG.10836	LOC105390170	XM_011561421.1	NA	NA	NA	NA	uncharacterized LOC105390170	11.7478	8.9749	13.0456	17.228	22.6416	11.4841	0.657563	-0.604798	0.0731474	1	down	no
LOC105382333	LOC105382333	XM_011552191.1	NA	03022(Basal transcription factors);03420(Nucleotide excision repair)	K10848	EC:3.1.-.-	uncharacterized LOC105382333	3.10408	2.23706	1.38611	1.90969	1.246	1.39663	1.47776	0.563415	0.0732625	1	up	no
MSTRG.12929	LOC105392725	XM_011564398.1	NA	NA	NA	NA	uncharacterized LOC105392725	1.86903	1.95055	1.09537	0.861548	0.853489	1.21617	1.67677	0.745681	0.0734194	1	up	no
LOC105397917	LOC105397917	XM_011569936.1	GO:0003700(transcription factor activity, sequence-specific DNA binding);GO:0005634(nucleus);GO:0006355(regulation of transcription, DNA-templated);GO:0007449(proximal/distal pattern formation, imaginal disc);GO:0007480(imaginal disc-derived leg morphogenesis);GO:0022416(chaeta development);GO:0035015(elongation of arista core);GO:0035218(leg disc development);GO:0043234(protein complex);GO:00435…	05202(Transcriptional misregulation in cancers)	NA	NA	homeobox protein aristaless-like	0.761872	0.44513	0.691603	1.15661	0.93534	1.34779	0.551962	-0.857359	0.0734571	1	down	no
MSTRG.4934	LOC105382785	XM_011552723.1;XM_011552722.1	NA	NA	NA	NA	uncharacterized LOC105382785%2C transcript variant X2	5.21186	3.81794	3.04202	2.82624	2.89266	2.8626	1.40673	0.492344	0.0734813	1	up	no
MSTRG.10800	LOC105390118	XM_011561360.1	GO:0019233(sensory perception of pain)	NA	NA	NA	SUZ domain-containing protein 1	2.58297	4.69244	3.39819	5.37158	7.78367	4.04762	0.620455	-0.688603	0.0735073	1	down	no
MSTRG.4696	LOC105382543	XM_011552447.1	GO:0007005(mitochondrion organization);GO:0007112(male meiosis cytokinesis);GO:0007283(spermatogenesis);GO:0010635(regulation of mitochondrial fusion);GO:0055050(astral spindle assembly involved in male meiosis)	NA	NA	NA	uncharacterized LOC105382543	6.2496	4.71273	4.23965	3.98732	3.03204	4.10681	1.36633	0.450301	0.0735097	1	up	no
MSTRG.8485	LOC105387168	XM_011557856.1	GO:0000176(nuclear exosome (RNase complex));GO:0000177(cytoplasmic exosome (RNase complex));GO:0000467(exonucleolytic trimming to generate mature 3'-end of 5.8S rRNA from tricistronic rRNA transcript (SSU-rRNA, 5.8S rRNA, LSU-rRNA));GO:0017091(AU-rich element binding);GO:0034427(nuclear-transcribed mRNA catabolic process, exonucleolytic, 3'-5');GO:0034473(U1 snRNA 3'-end processing);GO:0034475(U4…	03018(RNA degradation)	K12586	NA	exosome complex component RRP43-like	4.84905	4.51704	4.30643	3.30451	1.97698	3.83061	1.50048	0.585423	0.0736121	1	up	no
MSTRG.4735	LOC105382535	MSTRG.4735.1	NA	NA	NA	NA		16.9647	12.0179	12.2984	9.17432	13.233	4.83874	1.51511	0.599427	0.0736286	1	up	no
LOC105389473	LOC105389473	XM_011560585.1	GO:0003676(nucleic acid binding);GO:0003723(RNA binding);GO:0003964(RNA-directed DNA polymerase activity);GO:0004523(RNA-DNA hybrid ribonuclease activity);GO:0005575(cellular_component);GO:0006278(RNA-dependent DNA biosynthetic process)	03030(DNA replication)	NA	NA	uncharacterized LOC105389473	0.672784	1.04371	1.24089	0.634675	0.867549	0.254842	1.68314	0.751153	0.0736588	1	up	no
LOC105393115	LOC105393115	XM_011564844.1	GO:0016311(dephosphorylation);GO:0046030(inositol trisphosphate phosphatase activity);GO:0046856(phosphatidylinositol dephosphorylation)	00562(Inositol phosphate metabolism);04070(Phosphatidylinositol signaling system)	K01106	EC:3.1.3.56	phosphatidylinositol 4%2C5-bisphosphate 5-phosphatase A-like	1.8327	2.55229	3.14242	4.62792	3.39105	3.62826	0.646283	-0.629762	0.0736958	1	down	no
MSTRG.803	LOC105386467	XM_011557029.1	GO:0016491(oxidoreductase activity);GO:0046680(response to DDT);GO:0046701(insecticide catabolic process)	00591(Linoleic acid metabolism);00830(Retinol metabolism)	NA	NA	cytochrome P450 6B6-like	0.485533	0.480024	0.481908	0.773067	1.00439	0.798963	0.561813	-0.831837	0.0737668	1	down	no
MSTRG.2291	LOC105398543	XM_011570662.1	NA	00670(One carbon pool by folate)	NA	NA	uncharacterized LOC105398543	3.54895	3.14624	2.76912	7.84001	3.31514	4.15998	0.617972	-0.694388	0.0737719	1	down	no
MSTRG.5183		MSTRG.5183.1	NA	NA	NA	NA		1.63103	2.30213	2.17331	1.35491	7.12375	4.49217	0.470784	-1.08686	0.0739368	1	down	no
MSTRG.6274	LOC105384485	XM_011554736.1	GO:0004842(ubiquitin-protein transferase activity);GO:0005634(nucleus);GO:0005737(cytoplasm);GO:0016567(protein ubiquitination);GO:0034126(positive regulation of MyD88-dependent toll-like receptor signaling pathway);GO:0051865(protein autoubiquitination);GO:1903078(positive regulation of protein localization to plasma membrane)	04120(Ubiquitin mediated proteolysis)	K10615	EC:2.3.2.26	probable E3 ubiquitin-protein ligase HERC4	0.524689	1.41627	1.06903	1.71714	1.7999	1.33878	0.619871	-0.689961	0.0739701	1	down	no
MSTRG.10008		MSTRG.10008.1	NA	NA	NA	NA		1.20906	3.2293	1.87754	2.21421	3.15581	5.76778	0.567069	-0.818404	0.0740758	1	down	no
LOC105389417	LOC105389417	XM_011560520.1	GO:0005215(transporter activity);GO:0005622(intracellular);GO:0006810(transport);GO:0008431(vitamin E binding)	NA	NA	NA	alpha-tocopherol transfer protein-like	4.35622	5.63647	3.99895	2.7261	4.46694	2.78544	1.40218	0.487674	0.0742155	1	up	no
MSTRG.7284	LOC105385692	XM_011556112.1	NA	NA	NA	NA	putative nuclease HARBI1	8.92183	6.73103	6.54162	6.34877	5.06404	4.85749	1.36411	0.447959	0.0743294	1	up	no
MSTRG.2897	LOC105380375	MSTRG.2897.1	NA	NA	NA	NA		16.452	10.8509	11.994	11.1376	7.10497	8.47033	1.47108	0.556876	0.0744552	1	up	no
MSTRG.13635	LOC105393550	XM_011565328.1;MSTRG.13635.2	GO:0016155(formyltetrahydrofolate dehydrogenase activity);GO:0019145(aminobutyraldehyde dehydrogenase activity);GO:0047105(4-trimethylammoniobutyraldehyde dehydrogenase activity)	00670(One carbon pool by folate)	K00289	EC:1.5.1.6	cytosolic 10-formyltetrahydrofolate dehydrogenase-like	21.0177	24.8327	11.1651	35.5698	30.5427	19.7338	0.664159	-0.5904	0.0745695	1	down	no
MSTRG.6662	LOC105384940	XM_011555238.1;MSTRG.6662.2;MSTRG.6662.1	GO:0005214(structural constituent of chitin-based cuticle);GO:0008010(structural constituent of chitin-based larval cuticle);GO:0031012(extracellular matrix);GO:0040003(chitin-based cuticle development)	NA	NA	NA	endocuticle structural glycoprotein SgAbd-5-like	1.89556	4.06551	2.98866	4.21869	3.40348	7.58367	0.588572	-0.76471	0.0746413	1	down	no
MSTRG.3224	LOC105380782	XM_011550382.1;XM_011550383.1	NA	NA	NA	NA	uncharacterized LOC105380782%2C transcript variant X2	6.66317	2.83694	2.76774	3.51903	1.40839	1.77383	1.83068	0.872381	0.0750021	1	up	no
MSTRG.8662	LOC105387369	XM_011558085.1	NA	NA	NA	NA	uncharacterized LOC105387369	4.04165	2.77998	3.51932	1.91808	2.12638	2.44999	1.59227	0.671089	0.0750132	1	up	no
MSTRG.2829	LOC105380301	XM_011549825.1	GO:0005737(cytoplasm);GO:0030317(sperm motility);GO:0051087(chaperone binding)	NA	NA	NA	protein PIH1D3-like	2.29026	2.91641	2.91323	2.00693	1.95756	1.06845	1.61335	0.690061	0.0751591	1	up	no
MSTRG.2527	LOC105398809	MSTRG.2527.1	NA	NA	NA	NA		2.13295	3.39814	2.99453	4.95096	6.29069	4.30188	0.548499	-0.866438	0.0752881	1	down	no
LOC105388934	LOC105388934	XM_011559976.1;XM_011559975.1	GO:0003735(structural constituent of ribosome);GO:0005762(mitochondrial large ribosomal subunit);GO:0006412(translation);GO:0006412(translation)	NA	NA	NA	39S ribosomal protein L52%2C mitochondrial-like%2C transcript variant X1	3.68348	3.65143	3.33132	3.15887	2.08286	1.14396	1.67033	0.740137	0.0753379	1	up	no
MSTRG.9103	LOC105387899	XM_011558701.1	GO:0004872(receptor activity);GO:0005615(extracellular space);GO:0005887(integral component of plasma membrane);GO:0007158(neuron cell-cell adhesion);GO:0007416(synapse assembly);GO:0009986(cell surface);GO:0042043(neurexin family protein binding);GO:0045202(synapse);GO:0050804(modulation of synaptic transmission);GO:0052689(carboxylic ester hydrolase activity)	00564(Glycerophospholipid metabolism)	K01044	EC:3.1.1.1	juvenile hormone esterase-like	6.63406	3.10609	6.39777	10.4203	8.73375	6.13594	0.638114	-0.648114	0.0753663	1	down	no
MSTRG.3050	LOC105380514	XM_011550090.1	GO:0003674(molecular_function);GO:0005575(cellular_component);GO:0008150(biological_process)	NA	NA	NA	OCIA domain-containing protein 1-like	9.98334	8.31278	6.31255	6.61366	4.47851	6.13702	1.42831	0.514311	0.0754012	1	up	no
MSTRG.295	LOC105380439	MSTRG.295.1	NA	NA	NA	NA		2.44106	2.89329	5.48358	2.03183	1.48415	3.10163	1.63472	0.709044	0.0754395	1	up	no
MSTRG.4248	LOC105381982	XM_011551795.1;XM_011551794.1	GO:0003674(molecular_function);GO:0005575(cellular_component);GO:0008150(biological_process);GO:0008150(biological_process)	NA	NA	NA	uncharacterized LOC105381982%2C transcript variant X1	4.86071	3.78639	4.8561	6.92761	7.17542	5.60892	0.685026	-0.545769	0.0755207	1	down	no
LOC105387156	LOC105387156	XM_011557845.1	GO:0005351(sugar:proton symporter activity);GO:0005355(glucose transmembrane transporter activity);GO:0005887(integral component of plasma membrane);GO:0035428(hexose transmembrane transport);GO:0046323(glucose import)	NA	NA	NA	facilitated trehalose transporter Tret1-like	0.418233	0.313106	0.365436	0.391127	0.90007	0.82396	0.518531	-0.947497	0.0755311	1	down	no
MSTRG.570	LOC105384359	XM_011554587.1	GO:0008152(metabolic process);GO:0016758(transferase activity, transferring hexosyl groups)	NA	NA	NA	uncharacterized LOC105384359	2.32142	2.9386	7.17674	10.1396	6.89805	5.43446	0.55343	-0.853528	0.0755819	1	down	no
MSTRG.1172	LOC105390637	MSTRG.1172.1;XM_011561978.1	GO:0003916(DNA topoisomerase activity);GO:0005509(calcium ion binding);GO:0005634(nucleus);GO:0005700(polytene chromosome);GO:0005703(polytene chromosome puff);GO:0005737(cytoplasm);GO:0006265(DNA topological change);GO:0006325(chromatin organization);GO:0009047(dosage compensation by hyperactivation of X chromosome);GO:0012505(endomembrane system);GO:0045893(positive regulation of transcription,…	NA	NA	NA	calumenin-A-like	16.5331	18.1626	21.4554	13.4478	18.044	11.6413	1.30181	0.380515	0.075787	1	up	no
LOC105397417	LOC105397417	XM_011569440.1	GO:0000217(DNA secondary structure binding);GO:0001672(regulation of chromatin assembly or disassembly);GO:0003697(single-stranded DNA binding);GO:0003727(single-stranded RNA binding);GO:0005515(protein binding);GO:0005634(nucleus);GO:0005730(nucleolus);GO:0022008(neurogenesis);GO:0030707(ovarian follicle cell development);GO:0031491(nucleosome binding);GO:0031492(nucleosomal DNA binding);GO:0035…	NA	NA	NA	FACT complex subunit Ssrp1-like	0.779333	1.46832	1.09034	1.87959	1.5347	1.81956	0.63777	-0.648893	0.0761199	1	down	no
MSTRG.14965	LOC105395374	XM_011567330.1	GO:0005200(structural constituent of cytoskeleton);GO:0005575(cellular_component);GO:0007020(microtubule nucleation)	NA	NA	NA	tektin-2-like	5.47911	5.69745	5.48902	4.44066	2.8825	3.49344	1.54074	0.623625	0.0761352	1	up	no
LOC105391916	LOC105391916	XM_011563485.1	NA	NA	NA	NA	uncharacterized LOC105391916	0.648938	0.486576	0.338311	0.630945	1.47025	0.774473	0.512515	-0.964333	0.076275	1	down	no
LOC105385287	LOC105385287	XM_011555644.1;XM_011555642.1;XM_011555641.1	GO:0004930(G-protein coupled receptor activity);GO:0005938(cell cortex);GO:0007186(G-protein coupled receptor signaling pathway);GO:0007280(pole cell migration);GO:0007281(germ cell development);GO:0008354(germ cell migration);GO:0016021(integral component of membrane);GO:0035234(ectopic germ cell programmed cell death);GO:0035234(ectopic germ cell programmed cell death)	04020(Calcium signaling pathway);04080(Neuroactive ligand-receptor interaction);04971(Gastric acid secretion);04971(Gastric acid secretion)	NA	NA	protein trapped in endoderm-1%2C transcript variant X3	0.588927	0.478166	0.421993	0.891758	1.46304	0.489234	0.523583	-0.93351	0.0766081	1	down	no
MSTRG.5898	LOC105384021	MSTRG.5898.1	NA	NA	NA	NA		5.11593	4.52326	5.87693	4.01487	3.51029	3.21016	1.44533	0.531402	0.0766279	1	up	no
MSTRG.3221		MSTRG.3221.1	NA	NA	NA	NA		16.8183	12.302	10.4005	8.97497	7.2796	11.5972	1.41897	0.504846	0.0766562	1	up	no
MSTRG.1777	LOC105397906	XM_011569922.1	NA	NA	NA	NA	uncharacterized LOC105397906	7.19565	4.80751	4.91564	5.10159	2.79393	3.8596	1.43927	0.52534	0.0767384	1	up	no
MSTRG.13320		MSTRG.13320.1	NA	NA	NA	NA		7.46876	3.98345	2.66425	2.63753	3.02471	2.93177	1.64259	0.715975	0.0767943	1	up	no
MSTRG.7864	LOC105386391	XR_960701.1	GO:0003676(nucleic acid binding)	NA	NA	NA	uncharacterized LOC105386391	1.82826	1.29977	1.73041	2.75817	2.6314	1.82407	0.673507	-0.570234	0.0771044	1	down	no
MSTRG.12428	LOC105392107	MSTRG.12428.3;MSTRG.12428.2;XM_011563700.1	GO:0003677(DNA binding);GO:0005634(nucleus);GO:0005758(mitochondrial intermembrane space);GO:0005829(cytosol);GO:0006919(activation of cysteine-type endopeptidase activity involved in apoptotic process);GO:0016174(NAD(P)H oxidase activity);GO:0030182(neuron differentiation);GO:0032981(mitochondrial respiratory chain complex I assembly);GO:0045454(cell redox homeostasis);GO:0046983(protein dimeriz…	04214(Apoptosis - fly)	K04727	EC:1.-.-.-	apoptosis-inducing factor 1%2C mitochondrial-like	7.08787	5.73678	5.16711	4.58177	3.45851	4.93283	1.38685	0.471812	0.0773446	1	up	no
MSTRG.2114	LOC105398298	XM_011570372.1	GO:0005355(glucose transmembrane transporter activity);GO:0016021(integral component of membrane);GO:0055085(transmembrane transport)	04512(ECM-receptor interaction)	NA	NA	facilitated trehalose transporter Tret1-like	1.73587	2.6488	1.30282	1.31067	1.64807	0.698899	1.55496	0.636881	0.0774181	1	up	no
MSTRG.3254		MSTRG.3254.1	NA	NA	NA	NA		14.6791	9.28772	10.4242	7.8799	6.55376	9.50156	1.43684	0.522896	0.0775297	1	up	no
MSTRG.10592	LOC105389826	MSTRG.10592.1	NA	NA	NA	NA		3.10819	2.38598	2.55044	1.77818	1.67849	1.4908	1.626	0.70133	0.07754	1	up	no
MSTRG.14108	LOC105394123	XM_011565962.1	GO:0004620(phospholipase activity);GO:0005615(extracellular space);GO:0006644(phospholipid metabolic process);GO:0022008(neurogenesis);GO:0032504(multicellular organism reproduction);GO:0052689(carboxylic ester hydrolase activity)	00561(Glycerolipid metabolism)	NA	NA	lipase member H-A-like	1.11416	2.40109	1.37893	0.844629	0.659244	1.17153	1.82932	0.871311	0.0775815	1	up	no
MSTRG.11531	LOC105391047	XM_011562453.1	NA	NA	NA	NA	uncharacterized LOC105391047	8.51225	6.09929	5.02085	4.03979	2.80746	6.1367	1.51205	0.596506	0.0775852	1	up	no
MSTRG.11961	LOC105391549	XM_011563036.1;XM_011563037.1;XM_011563035.1	NA	NA	NA	NA	uncharacterized LOC105391549%2C transcript variant X1	0.0559684	3.54234	0.0489631	4.70866	4.51242	3.5769	0.284988	-1.81103	0.0776165	1	down	no
MSTRG.2738	LOC105380182	XM_011549685.1	GO:0005576(extracellular region);GO:0042742(defense response to bacterium);GO:0045088(regulation of innate immune response)	NA	K20692	NA	beta-1%2C3-glucan-binding protein-like	1.51453	1.95582	2.42105	2.65405	3.19168	3.29318	0.64465	-0.633412	0.0777757	1	down	no
MSTRG.1509	LOC105394797	XM_011566720.1	GO:0004806(triglyceride lipase activity)	00100(Steroid biosynthesis);04142(Lysosome)	K01052	EC:3.1.1.13	lipase 3-like	1.03747	0.950965	0.942348	1.55098	1.19682	1.94549	0.624463	-0.679312	0.0778296	1	down	no
MSTRG.7688	LOC105386181	XM_011556688.1	NA	NA	NA	NA	circadian clock-controlled protein-like	401.772	404.705	220.369	220.408	344.229	194.959	1.35183	0.434917	0.0779471	1	up	no
MSTRG.793		MSTRG.793.1	NA	NA	NA	NA		0.551021	1.73637	0.887805	1.34926	1.38237	3.31753	0.524898	-0.929892	0.0779744	1	down	no
MSTRG.1110	LOC105390783	MSTRG.1110.1	NA	NA	NA	NA		2.58304	2.18159	4.53494	1.89524	2.3049	0.999881	1.78837	0.838646	0.078203	1	up	no
MSTRG.4724	LOC105382522	XM_011552416.1;XM_011552417.1	NA	NA	NA	NA	uncharacterized LOC105382522%2C transcript variant X2	1.66264	1.42456	1.90023	0.798788	1.14565	1.07748	1.65041	0.722828	0.0783597	1	up	no
MSTRG.2340	LOC105398617	XM_011570761.1	NA	NA	NA	NA	protein FAM214A-like	4.17368	4.58989	4.06505	6.32292	8.7175	5.08971	0.637285	-0.649989	0.0785193	1	down	no
MSTRG.12852	LOC105392605	XM_011564256.1	GO:0006890(retrograde vesicle-mediated transport, Golgi to ER);GO:0007030(Golgi organization);GO:0017119(Golgi transport complex)	NA	NA	NA	conserved oligomeric Golgi complex subunit 7	2.51508	2.41583	2.37757	1.6055	2.26463	1.45601	1.37219	0.456481	0.0785783	1	up	no
MSTRG.3707		MSTRG.3707.1	NA	NA	NA	NA		14.8841	11.7713	9.02475	7.97673	7.67466	10.1526	1.38274	0.467525	0.0787384	1	up	no
MSTRG.3412	LOC105381045	XM_011550686.1	NA	NA	NA	NA	uncharacterized LOC105381045	8.17724	7.49213	8.77899	5.90316	3.6848	6.53562	1.51631	0.600566	0.0787816	1	up	no
MSTRG.14924	LOC105395326	XM_011567274.1	NA	NA	NA	NA	mitochondrial import receptor subunit TOM40 homolog	18.9112	14.5638	12.4186	10.9942	9.03192	13.0215	1.38871	0.473745	0.0788628	1	up	no
MSTRG.968	LOC105387991	XM_011558834.1;MSTRG.968.1;XM_011558849.1;XM_011558826.1;XM_011558841.1;XM_011558818.1;XM_011558862.1;XM_011558856.1	NA	NA	NA	NA	uncharacterized LOC105387991%2C transcript variant X3	8.18214	5.95219	5.99633	5.5821	4.1443	5.23377	1.34562	0.428268	0.0791985	1	up	no
MSTRG.3008	LOC105380536	MSTRG.3008.2;XM_011550113.1	GO:0001894(tissue homeostasis);GO:0002062(chondrocyte differentiation);GO:0005201(extracellular matrix structural constituent);GO:0048705(skeletal system morphogenesis)	04974(Protein digestion and absorption)	NA	NA	collagen alpha-1(III) chain	15.7111	14.1069	14.9895	23.7294	23.5938	15.0651	0.718203	-0.477536	0.0793428	1	down	no
MSTRG.9121	LOC105387929	XM_011558737.1	GO:0005730(nucleolus);GO:0044822(poly(A) RNA binding)	03008(Ribosome biogenesis in eukaryotes)	NA	NA	RNA exonuclease 4-like	2.83044	3.09537	1.73774	4.8158	4.78328	2.40139	0.638605	-0.647004	0.0794203	1	down	no
MSTRG.1050	LOC105389131	MSTRG.1050.1	NA	NA	NA	NA		16.648	10.6658	9.48568	10.9313	6.10618	8.77209	1.42581	0.511781	0.0794955	1	up	no
MSTRG.3928		MSTRG.3928.1	NA	NA	NA	NA		8.80481	8.02989	4.87097	6.10603	3.54888	4.38743	1.54573	0.628288	0.0795961	1	up	no
LOC105385296	LOC105385296	XM_011555658.1	GO:0001843(neural tube closure);GO:0005515(protein binding);GO:0005737(cytoplasm);GO:0005856(cytoskeleton);GO:0005929(cilium);GO:0007224(smoothened signaling pathway);GO:0007368(determination of left/right symmetry);GO:0007507(heart development);GO:0030030(cell projection organization);GO:0035058(nonmotile primary cilium assembly);GO:0035082(axoneme assembly);GO:0035869(ciliary transition zone);G…	NA	NA	NA	coiled-coil and C2 domain-containing protein 2A-like	0.956762	0.90291	0.829712	0.737451	0.561324	0.521745	1.47726	0.562925	0.0797948	1	up	no
MSTRG.2018	LOC105398214	MSTRG.2018.1	NA	NA	NA	NA		28.518	22.0787	18.3257	17.9842	12.8643	19.0655	1.38082	0.465528	0.0798202	1	up	no
MSTRG.13565	LOC105393488	MSTRG.13565.1	NA	NA	NA	NA		6.62473	6.53134	5.59368	4.74218	5.10433	4.16841	1.33784	0.419908	0.0799582	1	up	no
MSTRG.14284	LOC105394357	MSTRG.14284.1	NA	NA	NA	NA		6.72776	8.12756	7.23922	13.465	8.03982	10.7863	0.684229	-0.547449	0.0800883	1	down	no
MSTRG.529	LOC105383403	XM_011553452.1	GO:0000038(very long-chain fatty acid metabolic process);GO:0005575(cellular_component);GO:0006633(fatty acid biosynthetic process);GO:0009922(fatty acid elongase activity);GO:0016021(integral component of membrane);GO:0030497(fatty acid elongation)	00062(Fatty acid elongation)	K10249	EC:2.3.1.199	elongation of very long chain fatty acids protein AAEL008004-like	23.0895	20.5837	18.6179	41.9025	32.7174	19.1274	0.664458	-0.589751	0.080157	1	down	no
MSTRG.608	LOC105383992	XM_011554134.1	GO:0005634(nucleus);GO:0006355(regulation of transcription, DNA-templated)	04120(Ubiquitin mediated proteolysis)	NA	NA	uncharacterized LOC105383992	0.262949	0.522523	0.156806	0.525751	0.597899	0.602477	0.545891	-0.873314	0.080335	1	down	no
MSTRG.15128	LOC105395626	MSTRG.15128.1	NA	NA	NA	NA		4.97401	3.98798	3.23379	7.39213	7.47665	4.29246	0.636481	-0.65181	0.0803668	1	down	no
MSTRG.3597	LOC105381181	XM_011550863.1	NA	03440(Homologous recombination)	NA	NA	uncharacterized LOC105381181	12.2757	9.36573	8.2223	8.73166	7.5712	5.42964	1.37415	0.458539	0.0808705	1	up	no
MSTRG.3155	LOC105380640	XM_011550232.1	GO:0005229(intracellular calcium activated chloride channel activity);GO:0005634(nucleus);GO:0005783(endoplasmic reticulum);GO:0005886(plasma membrane);GO:0016021(integral component of membrane);GO:0017128(phospholipid scramblase activity);GO:0046983(protein dimerization activity);GO:0061589(calcium activated phosphatidylserine scrambling);GO:0061590(calcium activated phosphatidylcholine scrambli…	NA	NA	NA	anoctamin-6-like	7.81719	5.95652	5.56496	6.35844	3.64081	4.00185	1.38122	0.465948	0.0811291	1	up	no
MSTRG.7266	LOC105385678	MSTRG.7266.1	NA	NA	NA	NA		9.30435	13.5592	14.3829	2.963	3.3588	13.5095	1.87816	0.909321	0.0811455	1	up	no
MSTRG.2773	LOC105380219	XM_011549734.1	NA	NA	NA	NA	uncharacterized LOC105380219	12.6031	7.61397	9.03854	9.11386	4.58431	6.3905	1.45632	0.54233	0.0812995	1	up	no
MSTRG.767	LOC105386924	XM_011557581.1	NA	NA	NA	NA	neurotactin	5.60068	4.78918	3.91333	3.74247	3.85679	2.63709	1.3973	0.482637	0.0813628	1	up	no
MSTRG.7614	LOC105386081	XM_011556569.1	GO:0003993(acid phosphatase activity);GO:0005737(cytoplasm);GO:0016311(dephosphorylation);GO:0052642(lysophosphatidic acid phosphatase activity)	NA	NA	NA	uncharacterized LOC105386081	0.626044	0.597185	0.57318	0.300662	0.3767	0.435961	1.61356	0.690244	0.0817357	1	up	no
MSTRG.3997	LOC105381698	XM_011551487.1	GO:0005506(iron ion binding);GO:0005739(mitochondrion);GO:0009055(electron carrier activity);GO:0016705(oxidoreductase activity, acting on paired donors, with incorporation or reduction of molecular oxygen);GO:0017085(response to insecticide);GO:0020037(heme binding);GO:0055114(oxidation-reduction process)	00120(Primary bile acid biosynthesis);03320(PPAR signaling pathway)	NA	NA	cytochrome P450 CYP12A2-like	6.09615	6.65916	5.08402	4.59166	4.24799	4.45159	1.34219	0.424586	0.0817597	1	up	no
MSTRG.6964		MSTRG.6964.1	NA	NA	NA	NA		2.57733	2.52224	0.8408	5.65928	5.28654	1.8309	0.464937	-1.10489	0.0817641	1	down	no
MSTRG.9718	LOC105388684	XM_011559638.1	GO:0005215(transporter activity);GO:0016021(integral component of membrane);GO:0034220(ion transmembrane transport)	NA	NA	NA	monocarboxylate transporter 6-like	0.095122	1.88538	0.931409	2.35664	1.17529	3.18942	0.433233	-1.20679	0.0817714	1	down	no
MSTRG.7978	LOC105386547	XM_011557135.1	NA	NA	NA	NA	uncharacterized LOC105386547	4.48025	3.91353	3.02231	2.95901	2.4606	2.9542	1.36331	0.447111	0.0817836	1	up	no
LOC105394483	LOC105394483	XM_011566390.1;XM_011566391.1	GO:0005783(endoplasmic reticulum);GO:0005509(calcium ion binding);GO:0008150(biological_process);GO:0016021(integral component of membrane);GO:0016021(integral component of membrane)	04310(Wnt signaling pathway);04070(Phosphatidylinositol signaling system);04150(mTOR signaling pathway);04933(AGE-RAGE signaling pathway in diabetic complications);04933(AGE-RAGE signaling pathway in diabetic complications)	NA	NA	multiple C2 and transmembrane domain-containing protein 1%2C transcript variant X2	0.728387	1.16889	0.661663	0.516346	0.646912	0.500442	1.5381	0.621152	0.0818076	1	up	no
MSTRG.13871	LOC105393863	MSTRG.13871.2;XM_011565678.1	GO:0007411(axon guidance);GO:0007608(sensory perception of smell);GO:0016020(membrane);GO:0021772(olfactory bulb development);GO:0032391(photoreceptor connecting cilium);GO:0032880(regulation of protein localization);GO:0034260(negative regulation of GTPase activity);GO:0034464(BBSome);GO:0035264(multicellular organism growth);GO:0042384(cilium assembly);GO:0045444(fat cell differentiation);GO:00…	NA	NA	NA	tetratricopeptide repeat protein 8	2.05295	1.18058	1.72362	0.957459	1.28292	1.00862	1.52575	0.609515	0.0818126	1	up	no
MSTRG.13365	LOC105393261	MSTRG.13365.1	NA	NA	NA	NA		2.62363	2.62857	5.27318	4.38298	8.95485	6.62725	0.527189	-0.923607	0.0819307	1	down	no
MSTRG.3980	LOC105381639	XM_011551414.1;XM_011551416.1;XM_011551417.1	GO:0016020(membrane);GO:0016021(integral component of membrane);GO:0016021(integral component of membrane)	00130(Ubiquinone and other terpenoid-quinone biosynthesis);00130(Ubiquinone and other terpenoid-quinone biosynthesis)	K05357	EC:1.17.4.4	vitamin K epoxide reductase complex subunit 1%2C transcript variant X2	0.616744	1.24653	1.24923	1.67709	1.66511	1.91405	0.592153	-0.755957	0.0827549	1	down	no
LOC105392015	LOC105392015	XM_011563605.1	GO:0004842(ubiquitin-protein transferase activity);GO:0005737(cytoplasm)	NA	NA	NA	ankyrin repeat and MYND domain-containing protein 1-like	0.64023	0.737998	0.656611	0.625498	0.394442	0.2819	1.56305	0.644363	0.082875	1	up	no
MSTRG.12149	LOC105391779	MSTRG.12149.1	NA	NA	NA	NA		41.2679	26.6837	31.0674	31.145	10.7607	24.9989	1.48	0.5656	0.0829407	1	up	no
MSTRG.3725	LOC105381333	XM_011551039.1	GO:0016491(oxidoreductase activity)	00591(Linoleic acid metabolism);00830(Retinol metabolism)	NA	NA	probable cytochrome P450 9f2	1.96273	1.5292	3.01482	5.47482	1.96522	3.53727	0.592746	-0.754515	0.0829537	1	down	no
MSTRG.11093	LOC105390492	XM_011561803.1	NA	NA	NA	NA	uncharacterized LOC105390492	0.225884	0.602783	0.729185	0.934497	1.3331	0.56882	0.549232	-0.864511	0.0831426	1	down	no
LOC105382488	LOC105382488	XM_011552380.1	GO:0004423(iduronate-2-sulfatase activity);GO:0008152(metabolic process)	00531(Glycosaminoglycan degradation);04142(Lysosome)	K01136	EC:3.1.6.13	iduronate 2-sulfatase-like	0.507476	1.25571	0.846268	1.31233	1.73122	1.73155	0.546472	-0.871781	0.0832059	1	down	no
MSTRG.7046	LOC105385457	XM_011555842.1	NA	NA	NA	NA	uncharacterized LOC105385457	15.6626	14.1732	12.8518	13.4717	8.65805	10.0266	1.3275	0.408714	0.0833858	1	up	no
MSTRG.2181	LOC105398504	MSTRG.2181.1	NA	NA	NA	NA		2.83188	4.05675	3.7739	4.79537	5.84939	7.72153	0.580549	-0.78451	0.08339	1	down	no
LOC105387408	LOC105387408	XM_011558120.1	GO:0004089(carbonate dehydratase activity);GO:0005576(extracellular region);GO:0016020(membrane);GO:0016829(lyase activity);GO:0046658(anchored component of plasma membrane);GO:0046872(metal ion binding)	00910(Nitrogen metabolism)	K01672	EC:4.2.1.1	uncharacterized LOC105387408	1.28569	0.90177	0.863901	0.926913	0.388642	0.414332	1.76391	0.818775	0.0834259	1	up	no
MSTRG.8488	LOC105387171	XM_011557859.1	GO:0003341(cilium movement);GO:0003674(molecular_function);GO:0007605(sensory perception of sound);GO:0036157(outer dynein arm)	05016(Huntington's disease)	NA	NA	dynein intermediate chain 2%2C ciliary-like	1.9665	0.701071	0.773538	0.720932	0.398108	0.773876	1.81789	0.862265	0.0835874	1	up	no
MSTRG.14382	LOC105394477	XM_011566385.1	GO:0001745(compound eye morphogenesis);GO:0003924(GTPase activity);GO:0005525(GTP binding);GO:0005739(mitochondrion);GO:0006915(apoptotic process);GO:0007005(mitochondrion organization);GO:0007602(phototransduction);GO:0008053(mitochondrial fusion);GO:0010636(positive regulation of mitochondrial fusion);GO:0035073(pupariation);GO:0070584(mitochondrion morphogenesis)	NA	NA	NA	dynamin-like 120 kDa protein%2C mitochondrial	0.725608	0.708228	0.448449	0.323845	0	0.410989	2.56151	1.35699	0.0836683	1	up	no
MSTRG.5785	LOC105383883	MSTRG.5785.1	NA	NA	NA	NA		248.715	188.141	134.286	148.607	185.527	85.2485	1.36187	0.445587	0.0836864	1	up	no
MSTRG.13721	LOC105393671	MSTRG.13721.1	NA	NA	NA	NA		5.2661	2.57885	5.3715	2.6929	3.20247	2.16623	1.63943	0.713197	0.083734	1	up	no
MSTRG.1380	LOC105393072	XR_961006.1;XR_961005.1	NA	NA	NA	NA	uncharacterized LOC105393072%2C transcript variant X2	0.6556	1.22153	0.469296	1.62503	1.92973	0.981711	0.517237	-0.951102	0.0839031	1	down	no
MSTRG.3423		MSTRG.3423.1	NA	NA	NA	NA		6.57919	7.39228	5.75123	4.1135	4.06086	5.31027	1.46261	0.54854	0.0839956	1	up	no
MSTRG.8271	LOC105386890	MSTRG.8271.1;XM_011557540.1	GO:0004312(fatty acid synthase activity);GO:0005835(fatty acid synthase complex);GO:0006633(fatty acid biosynthetic process);GO:0016491(oxidoreductase activity);GO:0016788(hydrolase activity, acting on ester bonds);GO:0031177(phosphopantetheine binding);GO:0055114(oxidation-reduction process)	01212(Fatty acid metabolism);00061(Fatty acid biosynthesis)	K00665	EC:2.3.1.85	fatty acid synthase-like	12.1089	13.0211	11.7468	16.1277	13.7824	21.0506	0.723632	-0.466671	0.0840414	1	down	no
LOC105387897	LOC105387897	XM_011558697.1	GO:0003677(DNA binding);GO:0003700(transcription factor activity, sequence-specific DNA binding);GO:0005634(nucleus);GO:0006355(regulation of transcription, DNA-templated);GO:0007526(larval somatic muscle development);GO:0048813(dendrite morphogenesis)	05202(Transcriptional misregulation in cancers)	NA	NA	paired box protein Pax-1	0.875589	1.30085	1.35719	1.7856	1.81533	1.84054	0.649388	-0.622847	0.084057	1	down	no
MSTRG.12722	LOC105392465	XM_011564093.1	NA	NA	NA	NA	uncharacterized LOC105392465	4.75442	14.5231	15.003	23.9226	9.03079	27.7138	0.56506	-0.823525	0.0842588	1	down	no
MSTRG.72	LOC105381559	XM_011551348.1;MSTRG.72.1;XR_960494.1	NA	NA	NA	NA	uncharacterized LOC105381559%2C transcript variant X2	20.7774	12.7583	4.64081	13.4632	63.6022	7.56843	0.451078	-1.14855	0.0844062	1	down	no
LOC105391954	LOC105391954	XM_011563527.1	NA	NA	NA	NA	uncharacterized LOC105391954	1.08962	1.14327	1.07563	1.95965	1.71728	1.346	0.658683	-0.602343	0.0845385	1	down	no
MSTRG.2031	LOC105398221	XM_011570275.1;XM_011570277.1;MSTRG.2031.1;XM_011570276.1	GO:0004872(receptor activity);GO:0005615(extracellular space);GO:0005887(integral component of plasma membrane);GO:0007158(neuron cell-cell adhesion);GO:0007416(synapse assembly);GO:0009986(cell surface);GO:0042043(neurexin family protein binding);GO:0045202(synapse);GO:0050804(modulation of synaptic transmission);GO:0052689(carboxylic ester hydrolase activity);GO:0052689(carboxylic ester hydrola…	00983(Drug metabolism - other enzymes);00564(Glycerophospholipid metabolism);00564(Glycerophospholipid metabolism)	K01044	EC:3.1.1.1	esterase E4-like%2C transcript variant X3	3.30482	4.07106	4.43371	5.0875	5.04892	6.71851	0.700661	-0.513212	0.0845407	1	down	no
MSTRG.7856	LOC105386416	MSTRG.7856.2;XM_011556972.1	GO:0004252(serine-type endopeptidase activity);GO:0006508(proteolysis)	04080(Neuroactive ligand-receptor interaction)	NA	NA	uncharacterized LOC105386416	2.26806	1.69847	2.97617	3.67435	4.22831	2.63514	0.658837	-0.602007	0.0845945	1	down	no
MSTRG.4975		MSTRG.4975.1	NA	NA	NA	NA		9.41489	6.06583	5.9638	4.93547	5.19996	5.39738	1.3806	0.46529	0.0846967	1	up	no
MSTRG.8220	LOC105386841	XM_011557487.1	NA	NA	NA	NA	clavesin-1-like	1.25346	1.37474	3.66489	4.013	2.86337	4.33583	0.561272	-0.833228	0.0847203	1	down	no
LOC105397909	LOC105397909	XM_011569926.1	GO:0005109(frizzled binding);GO:0005615(extracellular space);GO:0016055(Wnt signaling pathway);GO:0030182(neuron differentiation);GO:0045165(cell fate commitment)	04310(Wnt signaling pathway);04340(Hedgehog signaling pathway)	K01357	NA	protein Wnt-10a	0.28961	0.347208	0.20874	0.415258	0.487431	0.558277	0.578766	-0.788947	0.0848459	1	down	no
MSTRG.2694	LOC105380151	XM_011549654.1	GO:0007368(determination of left/right symmetry);GO:0007507(heart development);GO:0060285(cilium-dependent cell motility);GO:0070286(axonemal dynein complex assembly)	NA	NA	NA	dynein regulatory complex protein 1-like	1.06445	0.631592	0.657615	0.480391	0.486158	0.521303	1.58192	0.661674	0.0848666	1	up	no
MSTRG.12056	LOC105391654	MSTRG.12056.1	NA	NA	NA	NA		9.40138	7.93026	6.86925	9.92885	14.2665	11.8216	0.67193	-0.573617	0.0849835	1	down	no
MSTRG.3747	LOC105381378;LOC105381401	XM_011551088.1;XM_011551090.1;XM_011551089.1;XM_011551093.1;XM_011551091.1;MSTRG.3747.2;XM_011551114.1;XM_011551086.1;XM_011551087.1;MSTRG.3747.3;XM_011551092.1	GO:0005886(plasma membrane);GO:0006936(muscle contraction);GO:0010649(regulation of cell communication by electrical coupling);GO:0010880(regulation of release of sequestered calcium ion into cytosol by sarcoplasmic reticulum);GO:0014701(junctional sarcoplasmic reticulum membrane);GO:0044325(ion channel binding);GO:0060047(heart contraction);GO:0060316(positive regulation of ryanodine-sensitive c…	03013(RNA transport);03015(mRNA surveillance pathway);03015(mRNA surveillance pathway)	NA	NA	uncharacterized LOC105381378%2C transcript variant X8;uncharacterized LOC105381401	12.0584	8.83648	8.09216	7.76384	5.14205	8.45563	1.35697	0.440393	0.0850463	1	up	no
MSTRG.10050	LOC105389099	MSTRG.10050.1	NA	NA	NA	NA		1.71379	4.79854	2.59685	5.66631	6.9323	4.00296	0.548694	-0.865927	0.0850484	1	down	no
MSTRG.5238	LOC105383204	XM_011553231.1	GO:0000978(RNA polymerase II core promoter proximal region sequence-specific DNA binding);GO:0005634(nucleus);GO:0006355(regulation of transcription, DNA-templated)	04110(Cell cycle)	NA	NA	zinc finger protein 91-like	0.112754	0.679046	0.591361	1.14794	0.928644	0.76629	0.486536	-1.03938	0.0850618	1	down	no
LOC105388733	LOC105388733	XM_011559688.1	GO:0004702(receptor signaling protein serine/threonine kinase activity);GO:0005737(cytoplasm)	04114(Oocyte meiosis)	NA	NA	STE20-like serine/threonine-protein kinase	1.01299	1.51439	1.36272	1.63044	3.3676	1.62565	0.587303	-0.767822	0.085083	1	down	no
MSTRG.4859	LOC105382672	XM_011552594.1	NA	NA	NA	NA	paramyosin%2C short form-like	1.74686	1.90629	1.79472	1.37488	0.558016	1.51324	1.58086	0.660713	0.0851969	1	up	no
MSTRG.8512	LOC105387187	XM_011557877.1;MSTRG.8512.2;MSTRG.8512.3	NA	NA	NA	NA	uncharacterized LOC105387187	14.5036	11.3234	9.11358	16.9864	17.6495	13.9757	0.718772	-0.476395	0.0853178	1	down	no
LOC105398232	LOC105398232	XM_011570292.1	GO:0003674(molecular_function);GO:0005575(cellular_component);GO:0046331(lateral inhibition);GO:0048813(dendrite morphogenesis)	NA	NA	NA	uncharacterized LOC105398232	4.56966	3.56133	1.95747	2.18245	2.5987	1.77966	1.53769	0.620761	0.0855767	1	up	no
MSTRG.9567	LOC105388476	XM_011559387.1;XM_011559388.1	NA	NA	NA	NA	uncharacterized LOC105388476%2C transcript variant X1	1.36851	1.33409	1.79926	1.27822	1.09038	0.660519	1.4862	0.571624	0.0855939	1	up	no
LOC105383283	LOC105383283	XM_011553316.1	NA	03013(RNA transport)	K14314	NA	uncharacterized LOC105383283	0.544642	0.700199	0.415804	0.932967	1.20046	0.758148	0.574305	-0.800112	0.0855987	1	down	no
LOC105394244	LOC105394244	XM_011566125.1	GO:0005886(plasma membrane);GO:0008417(fucosyltransferase activity)	00601(Glycosphingolipid biosynthesis - lacto and neolacto series)	NA	NA	alpha-(1%2C3)-fucosyltransferase C-like	3.31446	2.20798	2.84898	2.0639	1.12149	2.23843	1.54345	0.626163	0.0856881	1	up	no
MSTRG.10613	LOC105389855	XM_011561051.1	NA	NA	NA	NA	uncharacterized LOC105389855	6.38899	2.56193	3.87389	2.16925	0.997762	3.98101	1.79418	0.843321	0.0857568	1	up	no
MSTRG.14283	LOC105394354	XM_011566243.1	GO:0004029(aldehyde dehydrogenase (NAD) activity)	00010(Glycolysis / Gluconeogenesis);00040(Pentose and glucuronate interconversions);00053(Ascorbate and aldarate metabolism);00620(Pyruvate metabolism);00071(Fatty acid degradation);00561(Glycerolipid metabolism);00280(Valine, leucine and isoleucine degradation);00310(Lysine degradation);00330(Arginine and proline metabolism);00340(Histidine metabolism);00380(Tryptophan metabolism);00410(beta-Ala…	K00128	EC:1.2.1.3	aldehyde dehydrogenase X%2C mitochondrial-like	286.982	325.498	267.064	223.766	288.147	186.033	1.26019	0.333641	0.0860111	1	up	no
MSTRG.1938	LOC105398110	XM_011570165.1	NA	NA	NA	NA	dentin sialophosphoprotein-like	99.9373	73.8574	66.57	72.0717	46.3896	62.9151	1.32523	0.406238	0.0860999	1	up	no
MSTRG.1664	LOC105396734	XM_011568743.1;MSTRG.1664.1	GO:0000096(sulfur amino acid metabolic process);GO:0003824(catalytic activity);GO:0004123(cystathionine gamma-lyase activity);GO:0006750(glutathione biosynthetic process);GO:0030170(pyridoxal phosphate binding)	01230(Biosynthesis of amino acids);00260(Glycine, serine and threonine metabolism);00270(Cysteine and methionine metabolism);00450(Selenocompound metabolism)	K01758	EC:4.4.1.1	cystathionine gamma-lyase	45.4277	68.2513	54.4292	69.6434	67.3141	98.1341	0.715075	-0.483833	0.0861079	1	down	no
LOC105388470	LOC105388470	XM_011559379.1	NA	NA	NA	NA	uncharacterized LOC105388470	0.592566	0.437903	0.528138	0.511053	0.19362	0.192594	1.73706	0.796648	0.0862243	1	up	no
MSTRG.12144		MSTRG.12144.1	NA	NA	NA	NA		3.03391	4.12807	2.98092	3.98958	5.05838	6.86744	0.637301	-0.649953	0.0862875	1	down	no
MSTRG.1956	LOC105398122	XM_011570176.1	GO:0003682(chromatin binding);GO:0005515(protein binding);GO:0005634(nucleus);GO:0006261(DNA-dependent DNA replication);GO:0007062(sister chromatid cohesion);GO:0042555(MCM complex)	NA	NA	NA	mini-chromosome maintenance complex-binding protein-like	9.84533	8.84319	7.54973	13.7493	11.5301	11.4765	0.713852	-0.486303	0.0863562	1	down	no
MSTRG.12092		MSTRG.12092.1	NA	NA	NA	NA		4.84356	4.66684	4.98756	4.05534	2.51809	3.36989	1.45806	0.54405	0.0864169	1	up	no
LOC105394332	LOC105394332	XM_011566220.1	GO:0003924(GTPase activity);GO:0005739(mitochondrion);GO:0006412(translation)	03008(Ribosome biogenesis in eukaryotes)	NA	NA	translation factor GUF1 homolog%2C mitochondrial-like	0.792268	0.867227	0.664026	0.76139	1.42393	1.70569	0.597151	-0.743832	0.0864508	1	down	no
MSTRG.9001	LOC105387778	MSTRG.9001.1	NA	NA	NA	NA		38.2142	30.9287	24.257	26.5772	17.2968	25.8734	1.33912	0.421282	0.0864649	1	up	no
MSTRG.12126		MSTRG.12126.1	NA	NA	NA	NA		8.56051	8.1878	6.99851	5.21852	7.39793	5.42313	1.31637	0.396568	0.0866796	1	up	no
MSTRG.11546	LOC105391055	XM_011562459.1	GO:0004674(protein serine/threonine kinase activity);GO:0004691(cAMP-dependent protein kinase activity);GO:0005515(protein binding);GO:0005524(ATP binding);GO:0005737(cytoplasm);GO:0005886(plasma membrane);GO:0005952(cAMP-dependent protein kinase complex);GO:0006468(protein phosphorylation);GO:0007228(positive regulation of hh target transcription factor activity);GO:0007314(oocyte anterior/poste…	04310(Wnt signaling pathway);04340(Hedgehog signaling pathway);04213(Longevity regulating pathway - multiple species)	K04345	EC:2.7.11.11	cAMP-dependent protein kinase catalytic subunit-like	3.11715	3.11735	4.00186	2.76595	1.57021	2.62737	1.47	0.555812	0.0868313	1	up	no
MSTRG.329	LOC105381636	MSTRG.329.2;XM_011551415.1	GO:0004252(serine-type endopeptidase activity);GO:0006508(proteolysis)	04080(Neuroactive ligand-receptor interaction)	NA	NA	mannan-binding lectin serine protease 2-like	9.83608	9.67764	8.93135	11.4712	25.4911	8.33816	0.627921	-0.671345	0.0868824	1	down	no
MSTRG.1882	LOC105398026	MSTRG.1882.1;XM_011570079.1	GO:0000275(mitochondrial proton-transporting ATP synthase complex, catalytic core F(1));GO:0005524(ATP binding);GO:0005739(mitochondrion);GO:0005811(lipid particle);GO:0010906(regulation of glucose metabolic process);GO:0015986(ATP synthesis coupled proton transport);GO:0015991(ATP hydrolysis coupled proton transport);GO:0015992(proton transport);GO:0046331(lateral inhibition);GO:0046933(proton-t…	00190(Oxidative phosphorylation)	K02133	EC:3.6.3.14	ATP synthase subunit beta%2C mitochondrial	5.0806	3.70484	2.70433	2.31321	1.96995	3.40413	1.49464	0.579801	0.0869114	1	up	no
MSTRG.3777		MSTRG.3777.1	NA	NA	NA	NA		9.18564	6.5251	6.44929	6.68035	3.82835	5.3209	1.39991	0.485335	0.0869197	1	up	no
LOC105388171	LOC105388171	XM_011559037.1	GO:0004365(glyceraldehyde-3-phosphate dehydrogenase (NAD+) (phosphorylating) activity);GO:0005739(mitochondrion);GO:0005811(lipid particle);GO:0005829(cytosol);GO:0005886(plasma membrane);GO:0006915(apoptotic process);GO:0009277(fungal-type cell wall);GO:0032874(positive regulation of stress-activated MAPK cascade);GO:0070994(detection of oxidative stress);GO:0072593(reactive oxygen species metab…	01200(Carbon metabolism);01230(Biosynthesis of amino acids);00010(Glycolysis / Gluconeogenesis)	K00134	EC:1.2.1.12	uncharacterized LOC105388171	1.63861	1.48739	1.16658	1.21292	0.735345	1.0417	1.43566	0.521713	0.0869405	1	up	no
MSTRG.15769	LOC105397137	XM_011569149.1	GO:0000166(nucleotide binding);GO:0004445(inositol-polyphosphate 5-phosphatase activity);GO:0007269(neurotransmitter secretion);GO:0007602(phototransduction);GO:0012506(vesicle membrane);GO:0016311(dephosphorylation);GO:0043195(terminal bouton);GO:0046030(inositol trisphosphate phosphatase activity);GO:0046856(phosphatidylinositol dephosphorylation);GO:0048488(synaptic vesicle endocytosis);GO:004…	00562(Inositol phosphate metabolism);04070(Phosphatidylinositol signaling system)	K20279	EC:3.1.3.36	synaptojanin-1	3.73922	3.16907	2.96627	2.17984	2.97426	2.1361	1.3545	0.43776	0.0869855	1	up	no
MSTRG.13131	LOC105392967	MSTRG.13131.1	NA	NA	NA	NA		7.46532	9.83589	6.54293	13.2146	9.62741	11.9841	0.684663	-0.546535	0.0870364	1	down	no
MSTRG.10097	LOC105389160	XR_960843.1	NA	NA	NA	NA	uncharacterized LOC105389160	19.2846	23.5235	13.6003	28.2049	45.1065	16.3025	0.629459	-0.667815	0.0870822	1	down	no
MSTRG.3976	LOC105381614	MSTRG.3976.1	NA	NA	NA	NA		0	3.30971	3.44595	4.27419	9.52669	4.99349	0.359451	-1.47613	0.0871527	1	down	no
MSTRG.2976		MSTRG.2976.1	NA	NA	NA	NA		9.99913	6.0836	6.25274	4.34123	6.87117	3.95981	1.47213	0.557905	0.0872619	1	up	no
MSTRG.3097	LOC105380576	XM_011550161.1;XM_011550163.1;XM_011550162.1;XM_011550159.1;XM_011550164.1	GO:0003779(actin binding);GO:0005634(nucleus);GO:0005829(cytosol);GO:0031532(actin cytoskeleton reorganization);GO:0031532(actin cytoskeleton reorganization)	NA	NA	NA	phosphatase and actin regulator 1%2C transcript variant X5	2.58364	3.98704	4.37287	1.90464	3.47133	2.51343	1.38712	0.472094	0.0873036	1	up	no
MSTRG.7297	LOC105385719	XM_011556140.1	GO:0000010(trans-hexaprenyltranstransferase activity);GO:0008299(isoprenoid biosynthetic process)	00900(Terpenoid backbone biosynthesis)	K12505	EC:2.5.1.91	decaprenyl-diphosphate synthase subunit 2	5.26757	4.786	6.92945	10.9623	8.93108	5.55425	0.667372	-0.583437	0.0873045	1	down	no
MSTRG.4811	LOC105382655	MSTRG.4811.1	NA	NA	NA	NA		6.79527	7.12172	5.10136	9.58219	12.1926	7.08541	0.658981	-0.601691	0.0874277	1	down	no
LOC105380698	LOC105380698	XM_011550291.1	GO:0003700(transcription factor activity, sequence-specific DNA binding);GO:0006355(regulation of transcription, DNA-templated)	04550(Signaling pathways regulating pluripotency of stem cells);05016(Huntington's disease)	NA	NA	zinc finger protein OZF-like	0.249344	0.533568	0.406781	0.831309	0.821608	0.517364	0.548175	-0.867293	0.0874594	1	down	no
MSTRG.7758		MSTRG.7758.1	NA	NA	NA	NA		2.78236	2.3106	1.77866	3.4739	4.64326	2.97898	0.61928	-0.691336	0.087473	1	down	no
LOC105383969	LOC105383969	XM_011554108.1	GO:0000275(mitochondrial proton-transporting ATP synthase complex, catalytic core F(1));GO:0001525(angiogenesis);GO:0001649(osteoblast differentiation);GO:0005509(calcium ion binding);GO:0005524(ATP binding);GO:0005634(nucleus);GO:0005739(mitochondrion);GO:0005743(mitochondrial inner membrane);GO:0005753(mitochondrial proton-transporting ATP synthase complex);GO:0005886(plasma membrane);GO:000662…	00190(Oxidative phosphorylation)	K02133	EC:3.6.3.14	ATP synthase subunit beta%2C mitochondrial-like	1.15952	1.06877	0.870975	0.806391	0.612642	0.567308	1.56029	0.641813	0.0875234	1	up	no
MSTRG.10455	LOC105389637	XM_011560783.1	GO:0005351(sugar:proton symporter activity);GO:0005355(glucose transmembrane transporter activity);GO:0005887(integral component of plasma membrane);GO:0035428(hexose transmembrane transport);GO:0046323(glucose import)	04512(ECM-receptor interaction)	K06258	NA	synaptic vesicle glycoprotein 2B-like	7.03869	9.72193	5.92078	10.1504	12.7113	9.66616	0.697292	-0.520165	0.0875417	1	down	no
MSTRG.13162		MSTRG.13162.1	NA	NA	NA	NA		44.5183	29.7884	30.7724	28.7366	18.7651	27.7615	1.39616	0.481461	0.0878599	1	up	no
MSTRG.5648	LOC105383701	XM_011553795.1	GO:0003677(DNA binding);GO:0003700(transcription factor activity, sequence-specific DNA binding);GO:0005634(nucleus);GO:0006355(regulation of transcription, DNA-templated);GO:0043565(sequence-specific DNA binding)	NA	NA	NA	heat shock transcription factor%2C Y-linked-like	5.19998	5.21429	3.63623	3.7341	2.33379	3.74502	1.43184	0.517867	0.0878601	1	up	no
MSTRG.1382		MSTRG.1382.1	NA	NA	NA	NA		1.60477	2.91908	2.0356	2.80847	2.17485	5.54968	0.622752	-0.683271	0.0879909	1	down	no
LOC105380363	LOC105380363	XM_011549893.1	GO:0001525(angiogenesis);GO:0001568(blood vessel development);GO:0007163(establishment or maintenance of cell polarity);GO:0043534(blood vessel endothelial cell migration)	04390(Hippo signaling pathway)	K16819	NA	angiomotin-like	1.49515	1.52499	1.66953	2.14468	2.74791	2.07619	0.672955	-0.571417	0.0882108	1	down	no
MSTRG.6144	LOC105384340	XM_011554560.1	NA	NA	NA	NA	uncharacterized LOC105384340	8.13277	5.91256	9.42743	11.7799	17.3799	7.40699	0.641916	-0.639544	0.0884014	1	down	no
MSTRG.15049	LOC105395516	XM_011567468.1	GO:0003677(DNA binding);GO:0005634(nucleus);GO:0005758(mitochondrial intermembrane space);GO:0005829(cytosol);GO:0006919(activation of cysteine-type endopeptidase activity involved in apoptotic process);GO:0016021(integral component of membrane);GO:0016174(NAD(P)H oxidase activity);GO:0030182(neuron differentiation);GO:0032981(mitochondrial respiratory chain complex I assembly);GO:0045454(cell re…	04214(Apoptosis - fly)	K04727	EC:1.-.-.-	apoptosis-inducing factor 1%2C mitochondrial-like	9.93033	9.18667	9.7032	4.9917	7.87072	8.19493	1.36865	0.452756	0.0884656	1	up	no
LOC105395859	LOC105395859	XM_011567834.1	GO:0004715(non-membrane spanning protein tyrosine kinase activity);GO:0005102(receptor binding);GO:0007169(transmembrane receptor protein tyrosine kinase signaling pathway);GO:0030154(cell differentiation);GO:0031234(extrinsic component of cytoplasmic side of plasma membrane);GO:0038083(peptidyl-tyrosine autophosphorylation);GO:0042127(regulation of cell proliferation);GO:0045087(innate immune re…	04014(Ras signaling pathway);04012(ErbB signaling pathway);04110(Cell cycle);04722(Neurotrophin signaling pathway);04360(Axon guidance);05200(Pathways in cancer);05206(MicroRNAs in cancer);05220(Chronic myeloid leukemia);05416(Viral myocarditis)	NA	NA	tyrosine-protein kinase Abl-like	0.178037	0.69426	0.324816	0.438663	1.13834	0.799286	0.503773	-0.989154	0.0887099	1	down	no
MSTRG.3521	LOC105381096	MSTRG.3521.1	NA	NA	NA	NA		98.1421	80.5677	76.5943	66.3027	74.6636	60.464	1.26746	0.341935	0.0887344	1	up	no
MSTRG.9867	LOC105388868	MSTRG.9867.2;MSTRG.9867.3;XM_011559894.1	GO:0000166(nucleotide binding);GO:0003729(mRNA binding);GO:0005634(nucleus);GO:0007173(epidermal growth factor receptor signaling pathway);GO:0043484(regulation of RNA splicing)	NA	NA	NA	RNA-binding protein fusilli	7.56606	7.56311	7.9233	10.7789	9.33746	11.2931	0.733932	-0.446282	0.0887904	1	down	no
MSTRG.6839	LOC105385153	XM_011555482.1	GO:0004129(cytochrome-c oxidase activity);GO:0005743(mitochondrial inner membrane);GO:0006784(heme a biosynthetic process);GO:0008535(respiratory chain complex IV assembly);GO:0016653(oxidoreductase activity, acting on NAD(P)H, heme protein as acceptor)	00190(Oxidative phosphorylation);00860(Porphyrin and chlorophyll metabolism)	K02259	NA	cytochrome c oxidase assembly protein COX15 homolog	3.13662	5.0203	4.2206	6.19393	5.61875	6.12426	0.690058	-0.535211	0.088875	1	down	no
MSTRG.9995		MSTRG.9995.1	NA	NA	NA	NA		3.96861	5.63115	2.01221	2.10094	3.37989	2.15836	1.52005	0.604121	0.0891673	1	up	no
MSTRG.7067	LOC105385472	XM_011555858.1	NA	NA	NA	NA	uncharacterized LOC105385472	3.35123	4.11511	1.51023	0.966808	2.64183	1.51965	1.7504	0.807687	0.089298	1	up	no
MSTRG.1845	LOC105397985	XM_011570025.1	NA	04070(Phosphatidylinositol signaling system);04745(Phototransduction - fly)	K02183	NA	uncharacterized LOC105397985	8.31033	6.21685	5.26822	5.78121	3.19798	5.03788	1.41224	0.49798	0.0895803	1	up	no
MSTRG.4720	LOC105382550	MSTRG.4720.1	NA	NA	NA	NA		7.88318	5.96445	6.33547	5.42677	4.4048	5.30013	1.33383	0.415574	0.0896038	1	up	no
MSTRG.3998	LOC105381699	XM_011551488.1	NA	NA	NA	NA	sodium channel protein Nach-like	1.25593	1.23979	0.799455	0.985931	0.436065	0.505165	1.70986	0.773879	0.0897995	1	up	no
MSTRG.14212	LOC105394243	XM_011566122.1	GO:0016020(membrane);GO:0016021(integral component of membrane)	NA	NA	NA	uncharacterized LOC105394243	7.76295	5.37395	4.17381	4.77787	2.50909	4.53293	1.46454	0.550448	0.0900864	1	up	no
MSTRG.12561	LOC105392276	XM_011563880.1	NA	NA	NA	NA	uncharacterized LOC105392276	5.49247	3.80932	4.15439	4.00439	2.22096	3.30898	1.41134	0.497065	0.0902141	1	up	no
MSTRG.12356		MSTRG.12356.1	NA	NA	NA	NA		4.69194	4.56022	2.69816	7.46557	6.37285	4.73652	0.643357	-0.636308	0.0902932	1	down	no
MSTRG.7528	LOC105385990	MSTRG.7528.1	NA	NA	NA	NA		4.4921	3.60728	2.57892	2.1825	2.34069	2.09557	1.61334	0.690048	0.0903205	1	up	no
MSTRG.14107	LOC105394123	MSTRG.14107.1	NA	NA	NA	NA		12.2218	13.8716	11.084	7.22389	7.13077	11.1013	1.46046	0.546427	0.0903235	1	up	no
MSTRG.2543	LOC105398826	MSTRG.2543.1	NA	NA	NA	NA		4.70107	3.98824	4.11429	2.91573	2.59283	3.36937	1.44218	0.528255	0.0904473	1	up	no
MSTRG.403	LOC105381932	MSTRG.403.1	NA	NA	NA	NA		5.25708	5.99366	7.41942	10.4423	10.3081	8.43106	0.639796	-0.644316	0.0904877	1	down	no
MSTRG.3459	LOC105381031	XM_011550672.1;MSTRG.3459.3;MSTRG.3459.2	GO:0004497(monooxygenase activity);GO:0005506(iron ion binding);GO:0010430(fatty acid omega-oxidation);GO:0016021(integral component of membrane);GO:0016705(oxidoreductase activity, acting on paired donors, with incorporation or reduction of molecular oxygen);GO:0020037(heme binding)	00590(Arachidonic acid metabolism)	NA	NA	cytochrome P450 4C1-like	10.1526	10.1648	13.0483	18.7784	13.6593	14.6011	0.709325	-0.495482	0.0904919	1	down	no
MSTRG.5259	LOC105383184	MSTRG.5259.1	NA	NA	NA	NA		72.1973	62.7988	72.2531	55.8637	54.0963	53.9573	1.26435	0.338398	0.0905397	1	up	no
MSTRG.284	LOC105398665	XM_011570828.1	NA	NA	NA	NA	shootin-1-like	5.82757	5.44797	5.87806	9.02981	8.28009	6.8941	0.708709	-0.496734	0.0906413	1	down	no
MSTRG.1494	LOC105394373	XR_961065.1;MSTRG.1494.1	NA	NA	NA	NA	uncharacterized LOC105394373	124.584	84.7691	74.9916	74.4214	53.7739	82.4849	1.34965	0.432587	0.0907275	1	up	no
MSTRG.2603	LOC105380020	XM_011549500.1;XM_011549499.1	GO:0003677(DNA binding);GO:0003682(chromatin binding);GO:0005515(protein binding);GO:0005654(nucleoplasm);GO:0005737(cytoplasm);GO:0006281(DNA repair);GO:0045944(positive regulation of transcription from RNA polymerase II promoter);GO:1901796(regulation of signal transduction by p53 class mediator);GO:1901796(regulation of signal transduction by p53 class mediator)	NA	NA	NA	tetratricopeptide repeat protein 5-like%2C transcript variant X2	1.50477	2.21697	2.36852	2.99756	3.48132	2.70684	0.663014	-0.59289	0.0907745	1	down	no
MSTRG.848	LOC105386799	XM_011557439.1	GO:0005198(structural molecule activity);GO:0005886(plasma membrane);GO:0007165(signal transduction)	NA	NA	NA	CDC42 small effector protein homolog	19.4751	24.2758	24.6159	31.1585	48.2812	22.0776	0.673449	-0.570359	0.0909666	1	down	no
MSTRG.1338	LOC105392876	XM_011564564.1	GO:0003674(molecular_function);GO:0005615(extracellular space);GO:0007623(circadian rhythm)	NA	NA	NA	circadian clock-controlled protein-like	20.6203	40.1096	36.057	68.8014	34.8627	41.3151	0.667591	-0.582964	0.0910367	1	down	no
MSTRG.8826	LOC105387541	XM_011558273.1	NA	NA	NA	NA	uncharacterized LOC105387541	16.4497	10.9233	10.0468	10.3665	6.69124	9.56386	1.40562	0.491203	0.0910814	1	up	no
MSTRG.3949	LOC105381597	XM_011551361.1	NA	NA	NA	NA	properdin-like	9.37827	6.05338	4.14342	5.01243	2.96038	4.72514	1.54159	0.624423	0.0910963	1	up	no
LOC105394919	LOC105394919	XM_011566844.1	NA	04391(Hippo signaling pathway -fly)	NA	NA	uncharacterized LOC105394919	0.745678	0.545523	0.646386	0.336853	0.332647	0.559663	1.57635	0.656585	0.0911295	1	up	no
MSTRG.6277	LOC105384486	XM_011554737.1	GO:0004842(ubiquitin-protein transferase activity);GO:0005634(nucleus);GO:0005737(cytoplasm);GO:0042787(protein ubiquitination involved in ubiquitin-dependent protein catabolic process)	04120(Ubiquitin mediated proteolysis)	K10615	EC:2.3.2.26	probable E3 ubiquitin-protein ligase HERC3	0.493299	0.816258	0.578346	0.870649	1.27013	0.81674	0.638339	-0.647604	0.0913081	1	down	no
MSTRG.10280	LOC105389407	XM_011560509.1;MSTRG.10280.2	NA	00770(Pantothenate and CoA biosynthesis)	K08069	EC:3.5.1.92	vanin-like protein 2	0.50229	1.12771	0.298971	0.782631	1.25612	1.44189	0.554198	-0.851527	0.0913962	1	down	no
MSTRG.11755	LOC105391316	XM_011562781.1	GO:0000070(mitotic sister chromatid segregation)	NA	NA	NA	uncharacterized LOC105391316	4.25745	4.49455	3.82406	3.41825	1.94647	3.57926	1.40609	0.491692	0.0914258	1	up	no
MSTRG.10807	LOC105390132	MSTRG.10807.1	NA	NA	NA	NA		18.4143	18.7884	17.3751	29.2776	24.0556	22.6134	0.718633	-0.476672	0.0914798	1	down	no
MSTRG.3784	LOC105381456	XM_011551183.1	NA	NA	NA	NA	uncharacterized LOC105381456	2.00217	1.13638	1.09491	2.37486	3.95737	1.09512	0.569983	-0.81101	0.091555	1	down	no
MSTRG.10764		MSTRG.10764.1	NA	NA	NA	NA		3.52971	2.45921	3.32942	1.18039	3.10499	1.15021	1.71432	0.777634	0.0917197	1	up	no
LOC105381634	LOC105381634	XM_011551410.1	GO:0000220(vacuolar proton-transporting V-type ATPase, V0 domain);GO:0005886(plasma membrane);GO:0015991(ATP hydrolysis coupled proton transport);GO:0033181(plasma membrane proton-transporting V-type ATPase complex);GO:0046961(proton-transporting ATPase activity, rotational mechanism)	00190(Oxidative phosphorylation);04145(Phagosome);04142(Lysosome)	K02154	NA	V-type proton ATPase 116 kDa subunit a isoform 1-like	0.82226	0.721671	0.319273	0.476868	0.43022	0.181262	1.71195	0.775643	0.091753	1	up	no
MSTRG.6890		MSTRG.6890.1;MSTRG.6890.2	NA	NA	NA	NA		701.393	627.103	701.649	320.938	570.209	634.188	1.33095	0.412458	0.0918378	1	up	no
LOC105395100	LOC105395100	XM_011567024.1	NA	NA	NA	NA	uncharacterized LOC105395100	0.548932	0.734659	0.478532	0.463434	0.469767	0.275666	1.45766	0.543659	0.0918661	1	up	no
LOC105392736	LOC105392736	XM_011564409.1	GO:0005242(inward rectifier potassium channel activity);GO:0005887(integral component of plasma membrane);GO:0010107(potassium ion import)	04921(Oxytocin signaling pathway);04924(Renin secretion);04971(Gastric acid secretion);04725(Cholinergic synapse)	NA	NA	ATP-sensitive inward rectifier potassium channel 11-like	0.642811	0.631126	0.520804	0.348582	0.287448	0.449866	1.65277	0.72489	0.0919641	1	up	no
MSTRG.13884	LOC105393867	XM_011565684.1	GO:0000221(vacuolar proton-transporting V-type ATPase, V1 domain);GO:0015991(ATP hydrolysis coupled proton transport);GO:0015992(proton transport);GO:0033176(proton-transporting V-type ATPase complex);GO:0042626(ATPase activity, coupled to transmembrane movement of substances);GO:0046961(proton-transporting ATPase activity, rotational mechanism)	00190(Oxidative phosphorylation);04145(Phagosome)	K02149	NA	uncharacterized LOC105393867	13.8947	10.8984	8.84003	10.4386	6.51845	8.14193	1.34002	0.422251	0.0919823	1	up	no
MSTRG.4764	LOC105382574	XM_011552478.1	GO:0009813(flavonoid biosynthetic process);GO:0015020(glucuronosyltransferase activity);GO:0043231(intracellular membrane-bounded organelle);GO:0052696(flavonoid glucuronidation)	02010(ABC transporters);04146(Peroxisome)	K05677	NA	uncharacterized LOC105382574	0.249846	0.512677	0.32834	0.82222	0.66559	0.389448	0.581094	-0.783157	0.0920422	1	down	no
LOC105398069	LOC105398069	XM_011570125.1	NA	NA	NA	NA	uncharacterized LOC105398069	0.866684	0.727165	0.784111	0.588642	0.536803	0.425608	1.53313	0.616476	0.0922808	1	up	no
MSTRG.2342	LOC105398575	XM_011570705.1;XM_011570704.1;XM_011570703.1	NA	NA	NA	NA	uncharacterized LOC105398575%2C transcript variant X2	24.8911	18.1627	15.9625	15.8717	10.0756	16.7315	1.3828	0.467593	0.0923121	1	up	no
MSTRG.11420	LOC105390901	MSTRG.11420.2;XM_011562273.1	NA	NA	NA	NA	uncharacterized LOC105390901	25.3584	14.2456	17.0278	14.632	7.25282	16.1381	1.48941	0.574743	0.0924301	1	up	no
MSTRG.15340	LOC105395948	XM_011567931.1	NA	NA	NA	NA	uncharacterized LOC105395948	2.68449	4.73036	4.27121	5.62021	8.19378	4.09844	0.6524	-0.616172	0.092464	1	down	no
LOC105380112	LOC105380112	XM_011549610.1	GO:0003674(molecular_function);GO:0009405(pathogenesis);GO:0030260(entry into host cell)	NA	NA	NA	uncharacterized LOC105380112	1.69011	0.59902	0.741206	0.601342	0.712442	0.600648	1.58289	0.662562	0.0925818	1	up	no
MSTRG.7511	LOC105385950	XM_011556416.1	GO:0004124(cysteine synthase activity);GO:0005737(cytoplasm);GO:0006535(cysteine biosynthetic process from serine);GO:0030170(pyridoxal phosphate binding);GO:0080146(L-cysteine desulfhydrase activity)	01200(Carbon metabolism);01230(Biosynthesis of amino acids);00920(Sulfur metabolism);00270(Cysteine and methionine metabolism)	K01738	EC:2.5.1.47	putative inactive cysteine synthase 2	8.72205	21.9761	18.4048	24.8179	13.0833	43.3783	0.604126	-0.727079	0.0929332	1	down	no
MSTRG.13907	LOC105393890	XM_011565711.1	GO:0003674(molecular_function);GO:0004252(serine-type endopeptidase activity);GO:0005575(cellular_component);GO:0006508(proteolysis);GO:0008150(biological_process)	04080(Neuroactive ligand-receptor interaction)	K01312	EC:3.4.21.4	trypsin CFT-1-like	33.9444	34.2572	38.5034	25.0892	30.6012	28.6966	1.26447	0.338536	0.0930001	1	up	no
LOC105394365	LOC105394365	XM_011566256.1	GO:0005737(cytoplasm);GO:0006807(nitrogen compound metabolic process);GO:0008080(N-acetyltransferase activity)	NA	NA	NA	uncharacterized LOC105394365	1.51051	0.818488	1.23354	0.991479	0.326693	0.675479	1.78694	0.837492	0.0933443	1	up	no
MSTRG.7291	LOC105385714	MSTRG.7291.1	NA	NA	NA	NA		6.6307	1.5312	1.37474	2.26554	0.153483	1.52297	2.41924	1.27455	0.0933505	1	up	no
MSTRG.5096	LOC105382968	XM_011552963.1	GO:0004674(protein serine/threonine kinase activity);GO:0004683(calmodulin-dependent protein kinase activity);GO:0005516(calmodulin binding);GO:0005524(ATP binding);GO:0005829(cytosol);GO:0006468(protein phosphorylation);GO:0010906(regulation of glucose metabolic process)	04921(Oxytocin signaling pathway);04925(Aldosterone synthesis and secretion)	NA	NA	calcium/calmodulin-dependent protein kinase type 1	2.07133	3.74361	2.20958	3.58885	4.65107	3.48964	0.684128	-0.547661	0.0933995	1	down	no
MSTRG.6145		MSTRG.6145.1	NA	NA	NA	NA		7.47373	5.65731	7.6652	5.38257	4.48533	4.454	1.45206	0.5381	0.0934164	1	up	no
MSTRG.14307	LOC105394390	XM_011566282.1	GO:0004672(protein kinase activity);GO:0005524(ATP binding);GO:0005743(mitochondrial inner membrane);GO:0006468(protein phosphorylation);GO:0007005(mitochondrion organization);GO:0040018(positive regulation of multicellular organism growth);GO:0055088(lipid homeostasis);GO:0090277(positive regulation of peptide hormone secretion)	NA	NA	NA	uncharacterized aarF domain-containing protein kinase 1-like	2.90956	5.02115	3.42955	5.23285	5.95764	5.33408	0.687476	-0.540618	0.0935394	1	down	no
MSTRG.7603	LOC105386104	XM_011556598.1	GO:0006718(juvenile hormone biosynthetic process);GO:0007552(metamorphosis);GO:0016709(oxidoreductase activity, acting on paired donors, with incorporation or reduction of molecular oxygen, NAD(P)H as one donor, and incorporation of one atom of oxygen)	00981(Insect hormone biosynthesis)	K14937	EC:1.14.13.202;EC:1.14.13.203	probable cytochrome P450 304a1	5.88726	5.14152	2.8193	8.71956	7.65227	4.88638	0.651423	-0.618334	0.0935613	1	down	no
MSTRG.9123	LOC105387931	XM_011558739.1	NA	NA	NA	NA	uncharacterized LOC105387931	2.98334	1.84232	2.67825	2.37607	1.2078	1.25863	1.5496	0.631895	0.093579	1	up	no
MSTRG.12770	LOC105392527	XM_011564158.1;MSTRG.12770.1;MSTRG.12770.3	NA	NA	NA	NA	mucin-5AC-like	8.24324	10.9474	10.1623	10.8206	14.6768	14.5728	0.732539	-0.449023	0.0936093	1	down	no
MSTRG.5375	LOC105383363	XM_011553400.1	GO:0003674(molecular_function);GO:0005747(mitochondrial respiratory chain complex I);GO:0019233(sensory perception of pain)	00190(Oxidative phosphorylation)	K03956	NA	uncharacterized LOC105383363	75.6694	74.2293	87.7071	59.0476	63.4976	65.1328	1.26603	0.34031	0.0937554	1	up	no
MSTRG.13795	LOC105393755	MSTRG.13795.1	NA	NA	NA	NA		9.366	10.1126	10.6167	5.51928	4.69373	9.88004	1.49779	0.582839	0.093785	1	up	no
MSTRG.9615	LOC105388548	XM_011559480.1;XM_011559479.1	GO:0004075(biotin carboxylase activity);GO:0004485(methylcrotonoyl-CoA carboxylase activity);GO:0005524(ATP binding);GO:0005759(mitochondrial matrix);GO:0006551(leucine metabolic process);GO:0046872(metal ion binding);GO:0046872(metal ion binding)	00280(Valine, leucine and isoleucine degradation);00280(Valine, leucine and isoleucine degradation)	K01968	EC:6.4.1.4	methylcrotonoyl-CoA carboxylase subunit alpha%2C mitochondrial%2C transcript variant X1	2.99977	5.2822	3.50935	5.83252	6.21206	5.0207	0.690954	-0.533338	0.0938119	1	down	no
MSTRG.4466		MSTRG.4466.1	NA	NA	NA	NA		5.11094	4.78712	4.06588	2.54231	4.01448	3.22723	1.42722	0.513207	0.0938653	1	up	no
LOC105398355	LOC105398355	XM_011570430.1	GO:0003341(cilium movement);GO:0003674(molecular_function);GO:0007605(sensory perception of sound);GO:0010996(response to auditory stimulus);GO:0030425(dendrite);GO:0032420(stereocilium);GO:0036157(outer dynein arm);GO:0036158(outer dynein arm assembly);GO:0043025(neuronal cell body);GO:0046692(sperm competition)	05016(Huntington's disease)	NA	NA	dynein intermediate chain 2%2C axonemal-like	2.82361	3.09794	2.61464	2.24155	1.85272	2.20208	1.35574	0.439076	0.0939182	1	up	no
MSTRG.4040	LOC105381710	XM_011551500.1	GO:0005634(nucleus);GO:0005737(cytoplasm);GO:0009408(response to heat);GO:0009644(response to high light intensity);GO:0010286(heat acclimation);GO:0042542(response to hydrogen peroxide)	05020(Prion diseases)	NA	NA	hsp70-Hsp90 organizing protein 1-like	2.03221	2.69848	1.72033	3.16548	3.95496	2.4496	0.674085	-0.568998	0.0939453	1	down	no
MSTRG.4822	LOC105382632	MSTRG.4822.1	NA	NA	NA	NA		4.73151	7.17911	8.77181	2.69539	4.03497	5.49582	1.69165	0.75843	0.0940535	1	up	no
MSTRG.2152	LOC105398372	MSTRG.2152.1	NA	NA	NA	NA		8.26447	7.02413	8.69115	5.42739	5.65414	5.86789	1.41478	0.500581	0.0941175	1	up	no
MSTRG.6698	LOC105384986	XM_011555288.1	NA	NA	NA	NA	uncharacterized LOC105384986	1.20918	1.79614	1.26983	1.59423	3.8134	1.61545	0.60873	-0.716125	0.0942204	1	down	no
MSTRG.6417	LOC105384644	XM_011554916.1;MSTRG.6417.2	GO:0005575(cellular_component);GO:0016427(tRNA (cytosine) methyltransferase activity);GO:0030488(tRNA methylation)	NA	NA	NA	methyltransferase-like protein 6	14.3181	31.7007	22.7672	14.323	15.5019	20.0919	1.37801	0.462589	0.0942223	1	up	no
MSTRG.7606	LOC105386074;LOC105386076	XR_960686.1;XM_011556562.1;MSTRG.7606.2	GO:0003937(IMP cyclohydrolase activity);GO:0004643(phosphoribosylaminoimidazolecarboxamide formyltransferase activity);GO:0006164(purine nucleotide biosynthetic process);GO:0042060(wound healing)	00230(Purine metabolism);00670(One carbon pool by folate)	K00602	EC:2.1.2.3;EC:3.5.4.10	bifunctional purine biosynthesis protein PURH-like;uncharacterized LOC105386076	4.71985	7.32369	6.11143	8.04249	10.2252	7.46775	0.705446	-0.503393	0.094257	1	down	no
MSTRG.15311	LOC105395893	XM_011567871.1	GO:0006631(fatty acid metabolic process);GO:0017105(acyl-CoA delta11-desaturase activity);GO:0042811(pheromone biosynthetic process);GO:0055114(oxidation-reduction process)	01212(Fatty acid metabolism);01040(Biosynthesis of unsaturated fatty acids)	K00507	EC:1.14.19.1	acyl-CoA Delta(11) desaturase-like%2C transcript variant X1	2.02876	3.44712	1.81515	4.06371	2.8024	4.2686	0.654802	-0.610868	0.0945043	1	down	no
MSTRG.5832	LOC105383946	XM_011554088.1	NA	NA	NA	NA	uncharacterized LOC105383946	8.96258	5.6094	4.26614	4.55294	3.63013	4.98819	1.43025	0.516262	0.0946391	1	up	no
LOC105385536	LOC105385536	XM_011555929.1	GO:0005515(protein binding);GO:0020002(host cell plasma membrane)	04211(Longevity regulating pathway - mammal)	NA	NA	centrosomal protein of 290 kDa-like	1.95892	1.53027	1.69087	1.08889	1.05565	1.4291	1.44952	0.535574	0.0946774	1	up	no
MSTRG.10035	LOC105389069	MSTRG.10035.1	NA	NA	NA	NA		7.73352	6.50028	5.70331	5.9417	3.27435	5.10622	1.39204	0.477197	0.0947528	1	up	no
MSTRG.3223	LOC105380781	XM_011550381.1;MSTRG.3223.1	NA	NA	NA	NA	uncharacterized LOC105380781	20.4436	13.5164	13.8712	12.5701	8.17748	13.7449	1.38672	0.471673	0.0947975	1	up	no
MSTRG.10251	LOC105389380	XM_011560477.1	GO:0005214(structural constituent of chitin-based cuticle);GO:0008010(structural constituent of chitin-based larval cuticle);GO:0031012(extracellular matrix);GO:0040003(chitin-based cuticle development)	00230(Purine metabolism);00240(Pyrimidine metabolism);03020(RNA polymerase)	K03006	EC:2.7.7.6	larval/pupal rigid cuticle protein 66-like	9.39127	31.9362	31.5357	47.6263	13.6046	75.8913	0.531374	-0.9122	0.0953072	1	down	no
LOC105398351	LOC105398351	XM_011570425.1;XM_011570427.1	GO:0000122(negative regulation of transcription from RNA polymerase II promoter);GO:0002052(positive regulation of neuroblast proliferation);GO:0003677(DNA binding);GO:0003700(transcription factor activity, sequence-specific DNA binding);GO:0005634(nucleus);GO:0007219(Notch signaling pathway);GO:0007399(nervous system development);GO:0008134(transcription factor binding);GO:0043565(sequence-speci…	03460(Fanconi anemia pathway);04330(Notch signaling pathway);04330(Notch signaling pathway)	NA	NA	uncharacterized LOC105398351%2C transcript variant X2	4.34042	3.94887	4.97446	3.62266	2.95257	3.32468	1.33978	0.422	0.0954636	1	up	no
MSTRG.5235	LOC105383166	XM_011553182.1;MSTRG.5235.3;XM_011553183.1	GO:0004373(glycogen (starch) synthase activity);GO:0005977(glycogen metabolic process);GO:0005978(glycogen biosynthetic process);GO:0009267(cellular response to starvation);GO:0009744(response to sucrose);GO:0045819(positive regulation of glycogen catabolic process);GO:0071329(cellular response to sucrose stimulus);GO:0071329(cellular response to sucrose stimulus)	00500(Starch and sucrose metabolism);04931(Insulin resistance);04931(Insulin resistance)	K00693	EC:2.4.1.11	glycogen [starch] synthase%2C transcript variant X1	1.63613	2.58291	2.47192	2.80213	3.16388	3.79646	0.685376	-0.545031	0.0955486	1	down	no
MSTRG.14549	LOC105394756	MSTRG.14549.1	NA	NA	NA	NA		85.1582	49.0414	45.8034	55.8414	29.6662	43.6415	1.39376	0.478983	0.0956204	1	up	no
LOC105398050	LOC105398050	XM_011570103.1	NA	NA	NA	NA	uncharacterized LOC105398050	4.05787	4.04134	5.05266	3.18759	3.63802	2.70425	1.38007	0.46474	0.0957351	1	up	no
MSTRG.10400	LOC105389563	XM_011560695.1	GO:0003924(GTPase activity);GO:0005200(structural constituent of cytoskeleton);GO:0005525(GTP binding);GO:0005881(cytoplasmic microtubule);GO:0007017(microtubule-based process)	04145(Phagosome)	K07374	NA	tubulin alpha-1C chain-like	1.61209	1.15565	0.874898	0.941488	0.784307	0.529085	1.61544	0.69193	0.095738	1	up	no
LOC105392463	LOC105392463	XM_011564091.1;XM_011564090.1	GO:0003723(RNA binding);GO:0003964(RNA-directed DNA polymerase activity);GO:0005737(cytoplasm);GO:0006278(RNA-dependent DNA biosynthetic process);GO:0015074(DNA integration);GO:0015074(DNA integration)	01200(Carbon metabolism);00020(Citrate cycle (TCA cycle));00620(Pyruvate metabolism);00630(Glyoxylate and dicarboxylate metabolism);00270(Cysteine and methionine metabolism);00270(Cysteine and methionine metabolism)	NA	NA	uncharacterized LOC105392463%2C transcript variant X1	0.550092	0.497522	0.489837	0.309357	0.0131966	0.367108	2.22928	1.15658	0.0958324	1	up	no
MSTRG.13090		MSTRG.13090.1	NA	NA	NA	NA		5.31246	2.48477	2.48145	2.18545	1.86713	2.81909	1.4958	0.580922	0.0960096	1	up	no
MSTRG.1886	LOC105398143	MSTRG.1886.2;XM_011570194.1	GO:0005634(nucleus)	NA	NA	NA	CCAAT/enhancer-binding protein zeta-like	1.08652	1.19604	1.27266	2.13258	1.84557	1.32852	0.669953	-0.577869	0.0961024	1	down	no
MSTRG.2009	LOC105398205	XM_011570260.1	NA	NA	NA	NA	uncharacterized LOC105398205	8.83159	15.6958	14.0252	22.9691	16.4957	16.44	0.689611	-0.536145	0.0961214	1	down	no
MSTRG.15864	LOC105397279	XM_011569296.1	NA	NA	NA	NA	prostatic spermine-binding protein-like	4.43942	4.25451	5.58681	7.87933	6.73846	7.61166	0.642424	-0.638402	0.096169	1	down	no
MSTRG.1963	LOC105398126	XM_011570180.1	GO:0005096(GTPase activator activity);GO:0005515(protein binding);GO:0005634(nucleus);GO:0005737(cytoplasm);GO:0005886(plasma membrane);GO:0007166(cell surface receptor signaling pathway);GO:0043087(regulation of GTPase activity);GO:0043533(inositol 1,3,4,5 tetrakisphosphate binding);GO:0043547(positive regulation of GTPase activity);GO:0046872(metal ion binding)	04144(Endocytosis)	K12486	NA	arf-GAP with dual PH domain-containing protein 1-like	1.63889	2.07919	3.12767	3.89413	3.68655	2.96124	0.649383	-0.622858	0.0961825	1	down	no
MSTRG.9705	LOC105388674	XM_011559630.1	NA	NA	NA	NA	phospholipid scramblase 1-like	29.3482	25.0093	16.1656	19.4871	12.3106	18.5432	1.40091	0.486364	0.0962504	1	up	no
MSTRG.7761	LOC105386267	XM_011556786.1;XM_011556787.1	GO:0000922(spindle pole);GO:0005509(calcium ion binding);GO:0005814(centriole);GO:0006289(nucleotide-excision repair);GO:0008017(microtubule binding);GO:0031683(G-protein beta/gamma-subunit complex binding);GO:0032391(photoreceptor connecting cilium);GO:0032795(heterotrimeric G-protein binding);GO:0034605(cellular response to heat);GO:0000086(G2/M transition of mitotic cell cycle);GO:0000715(nucl…	03420(Nucleotide excision repair);03420(Nucleotide excision repair)	NA	NA	caltractin-like isoform X1	5.57277	4.23956	2.40524	3.42436	2.70487	2.13036	1.4792	0.564815	0.0965026	1	up	no
LOC105390220	LOC105390220	XM_011561494.1	GO:0000179(rRNA (adenine-N6,N6-)-dimethyltransferase activity);GO:0016021(integral component of membrane);GO:0031167(rRNA methylation)	NA	K05287	EC:2.7.-.-	protein RRNAD1	1.39146	1.37694	0.878184	1.79909	2.0978	1.81028	0.638948	-0.64623	0.0966572	1	down	no
MSTRG.10034	LOC105389069	MSTRG.10034.1	NA	NA	NA	NA		7.73352	6.50028	5.67166	5.9417	3.27435	5.10622	1.38983	0.474905	0.0966581	1	up	no
MSTRG.3698	LOC105381310	MSTRG.3698.1	NA	NA	NA	NA		35.6331	24.0633	35.8868	22.4039	20.1507	27.725	1.36004	0.443653	0.0968737	1	up	no
MSTRG.10157	LOC105389256	XM_011560347.1	GO:0005887(integral component of plasma membrane);GO:0008514(organic anion transmembrane transporter activity)	04512(ECM-receptor interaction)	K06258	NA	synaptic vesicle glycoprotein 2B-like	1.38591	3.58262	4.52548	4.35003	4.64769	6.40054	0.616564	-0.697677	0.096941	1	down	no
MSTRG.10211	LOC105389334	XM_011560434.1;MSTRG.10211.3;MSTRG.10211.2	GO:0003723(RNA binding);GO:0007281(germ cell development)	03013(RNA transport)	NA	NA	double-stranded RNA-binding protein Staufen homolog 2-like	3.07014	3.16114	3.6498	4.25009	5.58039	4.26306	0.701107	-0.512294	0.0973503	1	down	no
LOC105396513	LOC105396513	LOC105396513	NA	NA	NA	NA		3.3253	1.72017	1.63727	1.62659	1.15269	1.2955	1.64003	0.713719	0.0977065	1	up	no
MSTRG.4718	LOC105382550	MSTRG.4718.1	NA	NA	NA	NA		7.9164	6.07947	3.37656	4.55479	3.23989	4.33638	1.43206	0.518095	0.0981951	1	up	no
MSTRG.5126	LOC105383043	XM_011553057.1	GO:0005737(cytoplasm);GO:0005913(cell-cell adherens junction);GO:0007165(signal transduction);GO:0021987(cerebral cortex development);GO:0034334(adherens junction maintenance);GO:0045177(apical part of cell);GO:0048854(brain morphogenesis);GO:0048872(homeostasis of number of cells);GO:0050839(cell adhesion molecule binding);GO:0060019(radial glial cell differentiation);GO:0060563(neuroepithelial …	04520(Adherens junction);04530(Tight junction)	K05702	NA	afadin	1.2531	1.74572	1.41996	1.87543	2.80324	1.71514	0.691103	-0.533027	0.0981952	1	down	no
MSTRG.12699	LOC105392432	MSTRG.12699.3;XM_011564049.1	GO:0004972(NMDA glutamate receptor activity);GO:0017146(NMDA selective glutamate receptor complex)	NA	NA	NA	protein lifeguard 2-like%2C transcript variant X2	2.26534	2.30985	3.03701	4.09757	4.47537	2.71952	0.674096	-0.568974	0.0985115	1	down	no
MSTRG.4488	LOC105382286	XM_011552139.1	GO:0004648(O-phospho-L-serine:2-oxoglutarate aminotransferase activity)	01200(Carbon metabolism);01230(Biosynthesis of amino acids);00260(Glycine, serine and threonine metabolism);00750(Vitamin B6 metabolism)	K00831	EC:2.6.1.52	probable phosphoserine aminotransferase	89.6745	132.609	93.3991	140.601	136.45	149.756	0.739639	-0.435108	0.098518	1	down	no
MSTRG.11543		MSTRG.11543.1	NA	NA	NA	NA		34.9736	21.9199	22.058	21.5409	13.716	21.2083	1.39823	0.483602	0.0986324	1	up	no
MSTRG.7317	LOC105385733;LOC105385732	MSTRG.7317.2;XM_011556157.1;XM_011556159.1;XM_011556155.1;MSTRG.7317.5;XM_011556158.1;XM_011556156.1	GO:0004180(carboxypeptidase activity);GO:0004181(metallocarboxypeptidase activity);GO:0006508(proteolysis);GO:0008270(zinc ion binding);GO:0005615(extracellular space);GO:0005615(extracellular space)	04610(Complement and coagulation cascades);04972(Pancreatic secretion);04974(Protein digestion and absorption);04974(Protein digestion and absorption)	NA	NA	carboxypeptidase B-like%2C transcript variant X2	19.7627	23.0463	23.1848	30.0596	27.4848	30.6801	0.748021	-0.418849	0.0987461	1	down	no
MSTRG.3504	LOC105381139	XM_011550793.1	GO:0005436(sodium:phosphate symporter activity);GO:0005886(plasma membrane);GO:0006817(phosphate ion transport);GO:0016021(integral component of membrane);GO:0055085(transmembrane transport)	04142(Lysosome)	NA	NA	sialin-like	2.87059	3.446	3.32833	1.9647	2.31349	2.62216	1.39774	0.483098	0.0988394	1	up	no
MSTRG.7662	LOC105386179	XM_011556686.1	GO:0006508(proteolysis);GO:0008235(metalloexopeptidase activity);GO:0008239(dipeptidyl-peptidase activity);GO:0016805(dipeptidase activity)	03040(Spliceosome)	NA	NA	uncharacterized LOC105386179	0.357363	0.243228	0.546527	0.338039	0.205129	0.147074	1.66191	0.73284	0.0989932	1	up	no
MSTRG.3426	LOC105381012	XR_960464.1;XR_960463.1;XM_011550644.1;XM_011550645.1	NA	NA	NA	NA	uncharacterized LOC105381012%2C transcript variant X4	9.1415	7.23537	6.399	6.67274	3.43554	6.16501	1.39959	0.485	0.0990946	1	up	no
MSTRG.16123	LOC105397840	XM_011569855.1	NA	NA	NA	NA	pre-mRNA-splicing factor 38B-like	23.8994	14.7791	11.67	12.936	7.21629	14.4187	1.45638	0.542386	0.0990972	1	up	no
MSTRG.666	LOC105384859	XM_011555152.1	GO:0000184(nuclear-transcribed mRNA catabolic process, nonsense-mediated decay);GO:0000333(telomerase catalytic core complex);GO:0000723(telomere maintenance);GO:0004521(endoribonuclease activity);GO:0005730(nucleolus);GO:0005829(cytosol);GO:0035145(exon-exon junction complex);GO:0042162(telomeric DNA binding);GO:0043021(ribonucleoprotein complex binding);GO:0070034(telomerase RNA binding);GO:007…	03015(mRNA surveillance pathway)	K11124	EC:3.1.-.-	telomerase-binding protein EST1A-like	2.22243	3.39804	2.70752	3.85872	4.55118	3.89034	0.67706	-0.562645	0.0991333	1	down	no
MSTRG.5029	LOC105382888	XM_011552862.1	GO:0000287(magnesium ion binding);GO:0004749(ribose phosphate diphosphokinase activity);GO:0009156(ribonucleoside monophosphate biosynthetic process);GO:0009165(nucleotide biosynthetic process)	01200(Carbon metabolism);01230(Biosynthesis of amino acids);00030(Pentose phosphate pathway);00230(Purine metabolism)	K00948	EC:2.7.6.1	ribose-phosphate pyrophosphokinase 2-like	7.29835	12.9349	9.59159	15.6496	17.083	10.6112	0.688097	-0.539315	0.0991366	1	down	no
MSTRG.4987	LOC105382827	XM_011552778.1;XM_011552779.1	NA	NA	NA	NA	dentin sialophosphoprotein-like%2C transcript variant X2	1.56642	1.50999	1.43043	2.71571	2.62927	1.51991	0.656506	-0.607121	0.0991557	1	down	no
MSTRG.2276		MSTRG.2276.1	NA	NA	NA	NA		5.84112	3.9393	3.50982	5.46302	6.60567	7.53311	0.678011	-0.560619	0.0991697	1	down	no
MSTRG.10606	LOC105389848	MSTRG.10606.1	NA	NA	NA	NA		7.80055	9.61771	6.19985	6.83261	2.81005	6.2921	1.48218	0.567716	0.0995739	1	up	no
MSTRG.6275	LOC105384486	MSTRG.6275.1	NA	NA	NA	NA		2.54763	3.43213	1.68174	4.73167	4.52068	3.98432	0.578808	-0.788843	0.100262	1	down	no
MSTRG.13388	LOC105393292	XM_011565026.1;MSTRG.13388.2	GO:0004222(metalloendopeptidase activity);GO:0004867(serine-type endopeptidase inhibitor activity);GO:0005201(extracellular matrix structural constituent);GO:0005578(proteinaceous extracellular matrix);GO:0005604(basement membrane);GO:0008270(zinc ion binding);GO:0030198(extracellular matrix organization)	04610(Complement and coagulation cascades)	NA	NA	papilin-like	1.67905	3.30246	1.92951	3.39176	4.5416	2.37083	0.6707	-0.576261	0.100326	1	down	no
MSTRG.9976	LOC105388984	XM_011560033.1	NA	04512(ECM-receptor interaction)	K06265	NA	dystroglycan-like	3.46079	4.26219	2.20464	4.95552	5.64234	4.20101	0.670836	-0.575969	0.100361	1	down	no
MSTRG.2863	LOC105380365	XM_011549895.1	GO:0003824(catalytic activity);GO:0004556(alpha-amylase activity);GO:0005576(extracellular region);GO:0005975(carbohydrate metabolic process);GO:0030431(sleep);GO:0043169(cation binding)	00500(Starch and sucrose metabolism)	K01176	EC:3.2.1.1	alpha-amylase 1	0	0.423786	0.313572	0.716011	0.274103	0.990812	0.372229	-1.42574	0.100467	1	down	no
MSTRG.15743	LOC105397014	XM_011569022.1	GO:0001056(RNA polymerase III activity);GO:0005666(DNA-directed RNA polymerase III complex)	00230(Purine metabolism);00240(Pyrimidine metabolism);03020(RNA polymerase)	K03018	EC:2.7.7.6	DNA-directed RNA polymerase III subunit RPC1-like	0.77939	0.794266	0.826927	1.4282	0.854409	1.83106	0.583562	-0.777041	0.100512	1	down	no
MSTRG.7065	LOC105385471	MSTRG.7065.1	NA	NA	NA	NA		6.56079	5.29243	4.9729	3.85844	2.20169	4.22677	1.63568	0.709895	0.10054	1	up	no
MSTRG.1	ND2	ND2	NA	NA	NA	NA	NADH dehydrogenase subunit 2	16.6969	19.2733	53.3328	25.5109	8.06705	20.3814	1.655	0.726834	0.100594	1	up	no
MSTRG.80	LOC105382430	XM_011552347.1	NA	NA	NA	NA	uncharacterized LOC105382430	10.1345	7.59059	7.07851	5.65081	5.86781	6.91742	1.34538	0.428017	0.100654	1	up	no
MSTRG.10351	LOC105389499	MSTRG.10351.1	NA	NA	NA	NA		4.41067	1.04604	2.73927	1.66607	1.68413	1.07122	1.8537	0.890408	0.100704	1	up	no
MSTRG.10309	LOC105389451	XM_011560557.1	GO:0003755(peptidyl-prolyl cis-trans isomerase activity)	03040(Spliceosome)	NA	NA	uncharacterized LOC105389451	1.65284	1.84466	1.43256	1.21397	1.24836	1.14387	1.36711	0.451127	0.100731	1	up	no
MSTRG.3018	LOC105380492	XM_011550065.1;MSTRG.3018.1	NA	NA	NA	NA	uncharacterized LOC105380492	122.09	192.942	71.3779	2.18244	109.171	58.7295	2.2719	1.1839	0.100822	1	up	no
MSTRG.13606	LOC105393521;LOC105393516	XM_011565296.1;MSTRG.13606.3;XM_011565291.1	GO:0003676(nucleic acid binding);GO:0003677(DNA binding);GO:0005575(cellular_component);GO:0008150(biological_process);GO:0008270(zinc ion binding)	00512(Mucin type O-glycan biosynthesis)	NA	NA	uncharacterized LOC105393521;uncharacterized LOC105393516	7.76565	6.1061	8.45726	9.88036	8.34505	13.2628	0.709123	-0.495892	0.100828	1	down	no
MSTRG.12410	LOC105392075	XM_011563667.1;MSTRG.12410.1	NA	NA	NA	NA	nucleolar and coiled-body phosphoprotein 1-like	37.9205	27.8975	23.8617	25.7442	18.386	23.9592	1.31709	0.397353	0.100942	1	up	no
LOC105384487	LOC105384487	XM_011554738.1	NA	00670(One carbon pool by folate)	K10848	EC:3.1.-.-	uncharacterized LOC105384487	0.563183	0.461532	0.64955	0.417944	0.32558	0.334363	1.55328	0.635322	0.100971	1	up	no
MSTRG.649	LOC105384756	MSTRG.649.1	NA	NA	NA	NA		8.34677	7.08267	4.90364	6.7799	11.7328	11.0491	0.687816	-0.539906	0.10104	1	down	no
MSTRG.12119	LOC105391716	XM_011563249.1	GO:0016020(membrane);GO:0016709(oxidoreductase activity, acting on paired donors, with incorporation or reduction of molecular oxygen, NAD(P)H as one donor, and incorporation of one atom of oxygen);GO:0044550(secondary metabolite biosynthetic process)	04013(MAPK signaling pathway - fly);04630(Jak-STAT signaling pathway);04068(FoxO signaling pathway);04320(Dorso-ventral axis formation)	K03099	NA	uncharacterized LOC105391716	4.65738	3.86676	3.33983	3.19868	2.86088	2.90991	1.3227	0.403491	0.101049	1	up	no
MSTRG.266	LOC105398487	XR_961222.1	NA	NA	NA	NA	uncharacterized LOC105398487	6827.55	4998.5	5508.42	3200.83	5206.86	4994.44	1.29341	0.371182	0.101105	1	up	no
MSTRG.1927	LOC105398099	XM_011570152.1	GO:0005576(extracellular region);GO:0007552(metamorphosis);GO:0009615(response to virus);GO:0045297(post-mating behavior)	NA	NA	NA	ejaculatory bulb-specific protein 3-like	58.8391	85.2111	91.9998	128.106	79.476	127.837	0.703747	-0.50687	0.101118	1	down	no
MSTRG.11255	LOC105390686	MSTRG.11255.1;XM_011562024.1	GO:0004222(metalloendopeptidase activity);GO:0004867(serine-type endopeptidase inhibitor activity);GO:0005201(extracellular matrix structural constituent);GO:0005578(proteinaceous extracellular matrix);GO:0005604(basement membrane);GO:0008270(zinc ion binding);GO:0030198(extracellular matrix organization)	04610(Complement and coagulation cascades)	NA	NA	papilin	1.37775	3.31616	1.72335	2.65213	4.41662	2.68251	0.658096	-0.60363	0.101206	1	down	no
MSTRG.12543	LOC105392246	MSTRG.12543.1	NA	NA	NA	NA		1.02323	2.19926	2.14681	2.30516	4.01984	2.38798	0.616241	-0.698433	0.101278	1	down	no
MSTRG.474	LOC105382348	XM_011552215.1	NA	NA	NA	NA	uncharacterized LOC105382348	18.3494	10.5282	9.87635	9.5611	6.22876	10.7008	1.46293	0.548861	0.101338	1	up	no
LOC105383896	LOC105383896	XM_011554032.1	NA	NA	K14401	NA	uncharacterized LOC105383896	1.41148	0.955842	0.912685	2.49887	1.19085	1.73737	0.604378	-0.726476	0.101347	1	down	no
MSTRG.1562	LOC105395586	XM_011567548.1	GO:0004674(protein serine/threonine kinase activity);GO:0005524(ATP binding);GO:0005575(cellular_component);GO:0006468(protein phosphorylation);GO:0010906(regulation of glucose metabolic process);GO:0042594(response to starvation);GO:0055088(lipid homeostasis)	NA	NA	NA	uncharacterized LOC105395586	4.65471	5.45903	5.09302	4.16907	3.37138	4.05071	1.31193	0.391688	0.101472	1	up	no
MSTRG.14573	LOC105394787	XM_011566705.1	GO:0005741(mitochondrial outer membrane);GO:0043067(regulation of programmed cell death);GO:0097345(mitochondrial outer membrane permeabilization)	04068(FoxO signaling pathway)	K15464	NA	BCL2/adenovirus E1B 19 kDa protein-interacting protein 3-like	2.71616	3.7355	2.51357	4.9501	5.13859	3.48094	0.660684	-0.597969	0.101502	1	down	no
MSTRG.1585	LOC105395711	XM_011567675.1	GO:0042438(melanin biosynthetic process);GO:0048067(cuticle pigmentation)	NA	K22203	EC:5.3.3.12	protein yellow	4.60779	5.28643	7.35284	9.81624	8.00113	7.11961	0.691626	-0.531936	0.101609	1	down	no
MSTRG.3921	LOC105381553	XM_011551310.1;MSTRG.3921.1	GO:0005576(extracellular region);GO:0005616(larval serum protein complex);GO:0005811(lipid particle);GO:0008045(motor neuron axon guidance);GO:0016201(synaptic target inhibition);GO:0045735(nutrient reservoir activity)	00350(Tyrosine metabolism);00740(Riboflavin metabolism)	K00505	EC:1.14.18.1	basic juvenile hormone-suppressible protein 1-like	4.50293	4.77544	1.95666	0.517334	4.40803	1.36781	1.78527	0.836144	0.101648	1	up	no
LOC105394945	LOC105394945	XM_011566865.1	GO:0001078(transcriptional repressor activity, RNA polymerase II core promoter proximal region sequence-specific binding);GO:0001700(embryonic development via the syncytial blastoderm);GO:0001752(compound eye photoreceptor fate commitment);GO:0003700(transcription factor activity, sequence-specific DNA binding);GO:0003707(steroid hormone receptor activity);GO:0004872(receptor activity);GO:0004879…	04151(PI3K-Akt signaling pathway);04920(Adipocytokine signaling pathway);03320(PPAR signaling pathway);04919(Thyroid hormone signaling pathway);04976(Bile secretion);05200(Pathways in cancer);05202(Transcriptional misregulation in cancers);05216(Thyroid cancer);05222(Small cell lung cancer);05223(Non-small cell lung cancer);04932(Non-alcoholic fatty liver disease (NAFLD));05160(Hepatitis C)	NA	NA	steroid receptor seven-up%2C isoform A-like	2.5838	3.03862	2.75004	3.85532	4.97214	3.50908	0.678672	-0.559214	0.101705	1	down	no
MSTRG.11808	LOC105391383	XM_011562850.1	GO:0000902(cell morphogenesis);GO:0045475(locomotor rhythm)	NA	NA	NA	uncharacterized LOC105391383	1.52217	1.84474	1.07899	2.90635	2.42584	2.37311	0.576992	-0.793377	0.101743	1	down	no
MSTRG.9819	LOC105388805	MSTRG.9819.1;XM_011559785.1	NA	NA	NA	NA	uncharacterized LOC105388805	54.6045	34.0821	33.3026	35.8044	23.9974	31.7653	1.33224	0.41385	0.101921	1	up	no
MSTRG.653	LOC105384206	XM_011554413.1;XM_011554405.1	NA	04214(Apoptosis - fly);04214(Apoptosis - fly)	K04727	EC:1.-.-.-	uncharacterized LOC105384206%2C transcript variant X2	13.955	10.1035	9.02942	9.82971	6.42136	8.06431	1.36078	0.444436	0.101968	1	up	no
MSTRG.1709	LOC105397093	XM_011569103.1	GO:0005783(endoplasmic reticulum);GO:0005811(lipid particle);GO:0012505(endomembrane system);GO:0030730(sequestering of triglyceride);GO:0034389(lipid particle organization)	00230(Purine metabolism);00232(Caffeine metabolism);00983(Drug metabolism - other enzymes);04146(Peroxisome)	NA	NA	UPF0554 protein C2orf43 homolog	7.0214	8.66207	6.97444	12.2225	10.2154	9.40811	0.711485	-0.491096	0.102008	1	down	no
MSTRG.1367	LOC105393552	XM_011565334.1	GO:0005316(high-affinity inorganic phosphate:sodium symporter activity);GO:0016021(integral component of membrane);GO:0055085(transmembrane transport)	04142(Lysosome)	NA	NA	putative inorganic phosphate cotransporter	1.8691	3.35812	3.01605	3.29063	6.22363	4.01534	0.609278	-0.714828	0.102037	1	down	no
MSTRG.5856	LOC105383994	XM_011554132.1	NA	NA	NA	NA	uncharacterized LOC105383994	2.61049	4.77372	3.28339	5.36069	4.62086	5.71725	0.679517	-0.557418	0.102081	1	down	no
LOC105384209	LOC105384209	XM_011554404.1	GO:0004871(signal transducer activity);GO:0005576(extracellular region);GO:0005577(fibrinogen complex);GO:0007399(nervous system development);GO:0007460(R8 cell fate commitment);GO:0008407(chaeta morphogenesis);GO:0008587(imaginal disc-derived wing margin morphogenesis);GO:0016318(ommatidial rotation);GO:0016321(female meiosis chromosome segregation);GO:0045468(regulation of R8 cell spacing in co…	04014(Ras signaling pathway);04015(Rap1 signaling pathway);04066(HIF-1 signaling pathway);04151(PI3K-Akt signaling pathway)	NA	NA	protein scabrous	0.746204	0.596317	1.11614	0.525648	0.622518	0.417616	1.57024	0.650989	0.102168	1	up	no
MSTRG.5119	LOC105383012	MSTRG.5119.1	NA	NA	NA	NA		8.17407	8.4726	8.85934	9.27244	12.4015	13.3346	0.728565	-0.456871	0.102359	1	down	no
MSTRG.6460	LOC105384715	XM_011554993.1	GO:0006919(activation of cysteine-type endopeptidase activity involved in apoptotic process);GO:0007291(sperm individualization);GO:0016567(protein ubiquitination);GO:0031463(Cul3-RING ubiquitin ligase complex)	04120(Ubiquitin mediated proteolysis)	NA	NA	kelch-like protein 10	7.39847	4.71809	5.94031	5.05578	3.02759	4.80578	1.40094	0.486391	0.10245	1	up	no
MSTRG.322	LOC105380034	MSTRG.322.1	NA	NA	NA	NA		11.0634	5.74529	6.85294	6.45967	7.14091	3.54877	1.37974	0.464396	0.102488	1	up	no
MSTRG.10160	LOC105389262	XM_011560352.1	GO:0003674(molecular_function);GO:0005575(cellular_component);GO:0005737(cytoplasm);GO:0005856(cytoskeleton);GO:0008150(biological_process)	NA	NA	NA	coiled-coil domain-containing protein 96-like	4.31823	2.71856	2.14123	2.967	0.961125	1.99814	1.5487	0.631059	0.102494	1	up	no
MSTRG.15429	LOC105396177	MSTRG.15429.1	NA	NA	NA	NA		3.82963	4.21723	2.75075	3.7318	6.71205	6.74378	0.62822	-0.670658	0.102603	1	down	no
LOC105381700	LOC105381700	XM_011551489.1	GO:0005089(Rho guanyl-nucleotide exchange factor activity);GO:0005813(centrosome);GO:0005829(cytosol);GO:0019894(kinesin binding);GO:0022011(myelination in peripheral nervous system);GO:0035023(regulation of Rho protein signal transduction);GO:0051298(centrosome duplication);GO:0051496(positive regulation of stress fiber assembly);GO:0090307(mitotic spindle assembly)	04024(cAMP signaling pathway);04810(Regulation of actin cytoskeleton);04510(Focal adhesion);04650(Natural killer cell mediated cytotoxicity);04660(T cell receptor signaling pathway);04662(B cell receptor signaling pathway);04664(Fc epsilon RI signaling pathway);04666(Fc gamma R-mediated phagocytosis);04670(Leukocyte transendothelial migration);04062(Chemokine signaling pathway)	NA	NA	rho guanine nucleotide exchange factor 10	0.743675	0.724975	0.789885	0.870086	1.73116	1.02961	0.62204	-0.68492	0.10278	1	down	no
MSTRG.13057	LOC105392881;LOC105392891	XM_011564566.1;XM_011564577.1;MSTRG.13057.4;XM_011564567.1	NA	NA	NA	NA	uncharacterized LOC105392881%2C transcript variant X1;uncharacterized LOC105392891	7.16632	6.00412	5.60239	5.28213	4.53753	4.91903	1.27371	0.349038	0.102886	1	up	no
LOC105394456	LOC105394456	XM_011566359.1	GO:0006820(anion transport);GO:0016021(integral component of membrane);GO:0022857(transmembrane transporter activity);GO:0055085(transmembrane transport)	04142(Lysosome)	NA	NA	sialin-like	2.97815	1.51643	2.36373	1.64893	2.01065	1.14853	1.4264	0.512382	0.103018	1	up	no
MSTRG.13995	LOC105393988	MSTRG.13995.3;MSTRG.13995.1;XM_011565820.1	GO:0001745(compound eye morphogenesis);GO:0003924(GTPase activity);GO:0005525(GTP binding);GO:0005634(nucleus);GO:0005654(nucleoplasm);GO:0005730(nucleolus);GO:0006909(phagocytosis);GO:0040018(positive regulation of multicellular organism growth)	03008(Ribosome biogenesis in eukaryotes)	K14537	NA	nucleolar GTP-binding protein 2	34.6187	40.555	36.185	28.1332	26.6275	33.5645	1.26078	0.334318	0.103422	1	up	no
MSTRG.15071	LOC105395544	MSTRG.15071.2;XM_011567496.1	GO:0000103(sulfate assimilation);GO:0004020(adenylylsulfate kinase activity);GO:0050428(3'-phosphoadenosine 5'-phosphosulfate biosynthetic process)	00920(Sulfur metabolism);00230(Purine metabolism);00450(Selenocompound metabolism);00261(Monobactam)	K13811	EC:2.7.7.4;EC:2.7.1.25	bifunctional 3'-phosphoadenosine 5'-phosphosulfate synthase	7.962	7.77037	8.40032	11.4743	15.1875	7.62946	0.703755	-0.506854	0.103631	1	down	no
LOC105388524	LOC105388524	XM_011559451.1	GO:0003676(nucleic acid binding);GO:0003700(transcription factor activity, sequence-specific DNA binding);GO:0006355(regulation of transcription, DNA-templated);GO:0046872(metal ion binding)	04110(Cell cycle);05202(Transcriptional misregulation in cancers)	NA	NA	zinc finger protein OZF-like	4.10989	2.5384	2.98641	1.82809	2.90625	2.28479	1.37263	0.456947	0.103692	1	up	no
MSTRG.1835	LOC105397977	XM_011570013.1;XM_011570014.1	NA	NA	NA	NA	CD63 antigen-like%2C transcript variant X2	4.20821	2.38774	2.5574	2.95561	1.70902	1.45306	1.49621	0.581312	0.103719	1	up	no
MSTRG.2843	LOC105380353	XM_011549883.1	GO:0003840(gamma-glutamyltransferase activity);GO:0006750(glutathione biosynthetic process)	00430(Taurine and hypotaurine metabolism);00460(Cyanoamino acid metabolism);00480(Glutathione metabolism)	K00681	EC:2.3.2.2;EC:3.4.19.13	gamma-glutamyltranspeptidase 1-like	3.11356	4.33316	4.14556	5.83423	5.81983	4.8495	0.702411	-0.509612	0.10374	1	down	no
LOC105396738	LOC105396738	XM_011568744.1	GO:0003674(molecular_function);GO:0005575(cellular_component);GO:0008150(biological_process);GO:0045454(cell redox homeostasis)	04010(MAPK signaling pathway);04012(ErbB signaling pathway);04810(Regulation of actin cytoskeleton);04510(Focal adhesion)	NA	NA	thioredoxin-related transmembrane protein 2 homolog	1.1898	1.11159	1.85469	1.97026	2.49114	2.05399	0.637887	-0.648628	0.103963	1	down	no
MSTRG.12391	LOC105392059	XR_960965.1	NA	NA	NA	NA	uncharacterized LOC105392059	14.9803	14.3412	12.1562	8.64371	11.5837	11.1463	1.32205	0.402782	0.104004	1	up	no
MSTRG.8997	LOC105387774	XM_011558557.1	NA	03010(Ribosome)	NA	NA	uncharacterized LOC105387774	0.964727	0.588577	0.516754	0.542192	0.361455	0.429767	1.55245	0.634546	0.104092	1	up	no
MSTRG.6697	LOC105384984	XM_011555286.1	GO:0004653(polypeptide N-acetylgalactosaminyltransferase activity);GO:0005795(Golgi stack);GO:0009312(oligosaccharide biosynthetic process)	00512(Mucin type O-glycan biosynthesis)	K00710	EC:2.4.1.41	polypeptide N-acetylgalactosaminyltransferase 2-like	3.99009	5.73575	6.48204	8.61243	8.91745	5.98033	0.689398	-0.536592	0.104141	1	down	no
LOC105384449	LOC105384449	XM_011554681.1	NA	NA	NA	NA	uncharacterized LOC105384449	1.18654	0.933367	1.10909	0.345919	0.846839	0.697972	1.7078	0.772141	0.104189	1	up	no
MSTRG.74	LOC105392611	MSTRG.74.1	NA	NA	NA	NA		18.3553	14.7309	6.35348	25.1144	27.6356	12.6859	0.602722	-0.730435	0.104208	1	down	no
MSTRG.14908	LOC105395280	XM_011567227.1	GO:0000166(nucleotide binding);GO:0003674(molecular_function);GO:0005524(ATP binding);GO:0005575(cellular_component);GO:0005739(mitochondrion);GO:0008150(biological_process);GO:0046872(metal ion binding);GO:0051536(iron-sulfur cluster binding)	NA	NA	NA	iron-sulfur protein NUBPL-like	6.47092	5.51083	4.7697	4.53262	4.06478	3.7777	1.35364	0.436846	0.104427	1	up	no
LOC105380125	LOC105380125	XM_011549623.1	GO:0005391(sodium:potassium-exchanging ATPase activity);GO:0005886(plasma membrane);GO:0005890(sodium:potassium-exchanging ATPase complex);GO:0005918(septate junction);GO:0006812(cation transport);GO:0006813(potassium ion transport);GO:0006814(sodium ion transport);GO:0007424(open tracheal system development);GO:0007605(sensory perception of sound);GO:0008324(cation transmembrane transporter acti…	04260(Cardiac muscle contraction);04261(Adrenergic signaling in cardiomyocytes)	NA	NA	sodium/potassium-transporting ATPase subunit beta-2-like	0.240231	0.732976	0.344633	0.35754	0.807667	1.508	0.49298	-1.0204	0.104479	1	down	no
MSTRG.14477	LOC105394640	XM_011566546.1	NA	NA	NA	NA	histidine-rich glycoprotein-like	3.71802	1.08945	2.85065	7.05655	5.04783	2.34064	0.530156	-0.915511	0.104625	1	down	no
MSTRG.8955	LOC105387724	MSTRG.8955.1	NA	NA	NA	NA		9.95207	7.28362	6.98791	5.47333	6.76711	5.12254	1.39513	0.480399	0.104907	1	up	no
MSTRG.1710	LOC105397093	MSTRG.1710.1	NA	NA	NA	NA		10.8384	6.52969	7.83686	5.91502	5.91098	6.66263	1.36327	0.447067	0.104966	1	up	no
MSTRG.8419		MSTRG.8419.1	NA	NA	NA	NA		6.80476	0	0	2.32135	20.1432	7.50948	0.227022	-2.1391	0.104985	1	down	no
MSTRG.2687	LOC105380105	XM_011549602.1	GO:0005506(iron ion binding);GO:0009055(electron carrier activity);GO:0016020(membrane);GO:0016705(oxidoreductase activity, acting on paired donors, with incorporation or reduction of molecular oxygen);GO:0020037(heme binding);GO:0043231(intracellular membrane-bounded organelle);GO:0055114(oxidation-reduction process)	00590(Arachidonic acid metabolism)	NA	NA	cytochrome P450 4g15-like	0.779126	0.540774	0.614762	0.917397	1.06845	1.22726	0.602114	-0.731892	0.105028	1	down	no
MSTRG.13515	LOC105393424	MSTRG.13515.1	NA	NA	NA	NA		17.2857	15.7195	11.2717	8.37691	10.1911	13.2165	1.39303	0.478229	0.105068	1	up	no
MSTRG.12747	LOC105392503	XM_011564132.1	GO:0001085(RNA polymerase II transcription factor binding);GO:0005575(cellular_component);GO:0008168(methyltransferase activity);GO:0017069(snRNA binding);GO:0017148(negative regulation of translation);GO:0032259(methylation);GO:0042048(olfactory behavior)	NA	NA	NA	probable RNA methyltransferase bin3	3.66804	4.58691	3.73206	5.96732	6.82057	4.23403	0.70421	-0.505923	0.105128	1	down	no
MSTRG.15382	LOC105396066	MSTRG.15382.1	NA	NA	NA	NA		9.83669	7.69012	6.50001	5.98908	6.07827	5.76077	1.34769	0.430492	0.10518	1	up	no
MSTRG.1448	LOC105394043	XM_011565881.1	NA	NA	NA	NA	uncharacterized LOC105394043	23.1924	16.3254	14.5866	16.3887	8.56731	13.5796	1.40401	0.489557	0.105187	1	up	no
MSTRG.11223	LOC105390664	XM_011562003.1	NA	NA	NA	NA	uncharacterized LOC105390664	2.13347	2.64562	2.02291	4.81828	3.17835	2.66688	0.637877	-0.64865	0.105196	1	down	no
MSTRG.10103	LOC105389205	MSTRG.10103.3;MSTRG.10103.1;XM_011560287.1	NA	00531(Glycosaminoglycan degradation);04142(Lysosome)	K10532	EC:2.3.1.78	uncharacterized LOC105389205	6.33791	7.0348	5.94392	11.0019	9.30361	6.78878	0.712942	-0.488144	0.105241	1	down	no
MSTRG.15914	LOC105397364	XM_011569376.1	GO:0005214(structural constituent of chitin-based cuticle);GO:0008010(structural constituent of chitin-based larval cuticle);GO:0031012(extracellular matrix);GO:0040003(chitin-based cuticle development)	00230(Purine metabolism);00240(Pyrimidine metabolism);03020(RNA polymerase)	K03006	EC:2.7.7.6	cuticle protein 7-like	19.5979	80.2103	84.1416	118.383	32.4681	198.991	0.525809	-0.92739	0.105336	1	down	no
MSTRG.7410		MSTRG.7410.1	NA	NA	NA	NA		7.71883	6.5876	8.82986	5.16827	6.1581	4.97429	1.41935	0.505227	0.105446	1	up	no
MSTRG.7070	LOC105385494	MSTRG.7070.1	NA	NA	NA	NA		21.0618	10.265	13.9134	10.6848	12.8408	8.97706	1.39189	0.477046	0.10546	1	up	no
MSTRG.1492	LOC105394379	XM_011566316.1;XM_011566287.1;XM_011566309.1;XM_011566294.1;MSTRG.1492.4;XM_011566280.1;MSTRG.1492.8;MSTRG.1492.1;XM_011566302.1;XM_011566273.1;MSTRG.1492.9;XM_011566339.1;MSTRG.1492.5	GO:0000122(negative regulation of transcription from RNA polymerase II promoter);GO:0000977(RNA polymerase II regulatory region sequence-specific DNA binding);GO:0003700(transcription factor activity, sequence-specific DNA binding);GO:0003707(steroid hormone receptor activity);GO:0004879(RNA polymerase II transcription factor activity, ligand-activated sequence-specific DNA binding);GO:0004887(th…	04710(Circadian rhythm);04710(Circadian rhythm)	NA	NA	probable nuclear hormone receptor HR3%2C transcript variant X3	83.7466	77.802	45.4549	35.4977	78.2861	39.2439	1.35272	0.435862	0.105544	1	up	no
MSTRG.808	LOC105387005	XM_011557669.1	GO:0016491(oxidoreductase activity);GO:0046680(response to DDT);GO:0046701(insecticide catabolic process)	00140(Steroid hormone biosynthesis);00591(Linoleic acid metabolism);00830(Retinol metabolism)	NA	NA	cytochrome P450 6B6-like	2.95168	4.57614	6.12349	7.87142	5.72348	6.6289	0.675012	-0.567015	0.106274	1	down	no
MSTRG.14860	LOC105395173	XM_011567111.1	GO:0003774(motor activity);GO:0003777(microtubule motor activity);GO:0005524(ATP binding);GO:0005858(axonemal dynein complex);GO:0005875(microtubule associated complex);GO:0007018(microtubule-based movement);GO:0008017(microtubule binding);GO:0016887(ATPase activity);GO:0042623(ATPase activity, coupled)	05016(Huntington's disease)	NA	NA	dynein beta chain%2C ciliary-like	1.68447	1.39761	1.60373	1.26137	0.384299	1.06076	1.73137	0.791911	0.106299	1	up	no
MSTRG.11840	LOC105391412	MSTRG.11840.2;XM_011562877.1	GO:0004702(receptor signaling protein serine/threonine kinase activity);GO:0005737(cytoplasm)	04114(Oocyte meiosis)	NA	NA	uncharacterized LOC105391412	1.94041	1.82525	2.19905	1.54324	1.40295	1.46299	1.35279	0.43594	0.106454	1	up	no
MSTRG.11104	LOC105390482	MSTRG.11104.1	NA	NA	NA	NA		3.05908	3.42401	1.01371	4.10943	4.0871	5.35242	0.553312	-0.853836	0.106476	1	down	no
MSTRG.407	LOC105381242	XM_011550932.1	NA	NA	NA	NA	uncharacterized LOC105381242	32.0284	38.1499	48.0298	42.0838	46.8049	81.7881	0.692585	-0.529937	0.106746	1	down	no
LOC105388830	LOC105388830	XM_011559833.1	GO:0016021(integral component of membrane);GO:0016175(superoxide-generating NADPH oxidase activity);GO:0042554(superoxide anion generation);GO:0055114(oxidation-reduction process)	04145(Phagosome);04933(AGE-RAGE signaling pathway in diabetic complications)	K21423	EC:1.6.3.-	NADPH oxidase 1-like	2.51914	2.03103	1.42712	1.47567	1.64912	0.639299	1.58798	0.667189	0.106747	1	up	no
MSTRG.11360		MSTRG.11360.1	NA	NA	NA	NA		3.29865	3.84303	4.89697	9.69001	3.35286	7.57932	0.583772	-0.776524	0.106871	1	down	no
MSTRG.537	LOC105383412;LOC105382903	MSTRG.537.2;MSTRG.537.1;MSTRG.537.3;XM_011552881.1	GO:0008812(choline dehydrogenase activity);GO:0016491(oxidoreductase activity);GO:0034976(response to endoplasmic reticulum stress);GO:0045455(ecdysteroid metabolic process);GO:0046331(lateral inhibition);GO:0050660(flavin adenine dinucleotide binding);GO:0055114(oxidation-reduction process)	00260(Glycine, serine and threonine metabolism)	NA	NA	glucose dehydrogenase [FAD%2C quinone]-like	21.6012	27.316	19.1226	13.0578	25.259	14.1923	1.29578	0.373816	0.106886	1	up	no
MSTRG.1296		MSTRG.1296.1	NA	NA	NA	NA		37.751	31.9473	22.9612	36.781	69.8193	32.9504	0.663985	-0.590778	0.106999	1	down	no
LOC105385628	LOC105385628	XM_011556040.1	GO:0000122(negative regulation of transcription from RNA polymerase II promoter);GO:0001078(transcriptional repressor activity, RNA polymerase II core promoter proximal region sequence-specific binding);GO:0005634(nucleus);GO:0030182(neuron differentiation);GO:0045944(positive regulation of transcription from RNA polymerase II promoter);GO:0055007(cardiac muscle cell differentiation)	NA	K20211	NA	homeobox protein prospero	1.91337	2.02536	2.15783	3.51072	2.66036	3.25937	0.646476	-0.629331	0.107119	1	down	no
MSTRG.1423	LOC105393761	XM_011565563.1	GO:0005053(peroxisome matrix targeting signal-2 binding);GO:0007031(peroxisome organization);GO:0035859(Seh1-associated complex)	03440(Homologous recombination);03450(Non-homologous end-joining)	K20408	NA	WD repeat-containing protein 24-like	0.734033	1.07773	1.01714	2.02713	1.89277	0.792876	0.600263	-0.736333	0.107432	1	down	no
LOC105387194	LOC105387194	XR_960751.1	NA	NA	NA	NA	uncharacterized LOC105387194	0.594089	2.3246	1.24027	1.88205	3.69076	2.31875	0.527014	-0.924088	0.107435	1	down	no
MSTRG.2397	LOC105398646	XM_011570800.1;XM_011570801.1	GO:0004177(aminopeptidase activity);GO:0030145(manganese ion binding);GO:0030145(manganese ion binding)	NA	NA	NA	probable Xaa-Pro aminopeptidase 3%2C transcript variant X1	2.12652	2.29588	1.64961	2.70101	3.30566	2.72139	0.695689	-0.523485	0.107505	1	down	no
MSTRG.2657		MSTRG.2657.1	NA	NA	NA	NA		7.49898	4.9473	3.68091	2.73288	4.88718	3.42342	1.46034	0.5463	0.107537	1	up	no
MSTRG.7439	LOC105385877	XM_011556322.1	GO:0003674(molecular_function);GO:0005575(cellular_component);GO:0008150(biological_process)	04120(Ubiquitin mediated proteolysis)	K10582	EC:2.3.2.23	ubiquitin-conjugating enzyme E2Q-like protein 1	3.30615	3.67758	3.80729	6.5083	5.11901	3.96002	0.692294	-0.530542	0.107547	1	down	no
MSTRG.6457		MSTRG.6457.1	NA	NA	NA	NA		0.363806	0.31764	0.178029	0.606882	0.535845	0.368112	0.568873	-0.813822	0.107572	1	down	no
MSTRG.13563	LOC105393472	XM_011565239.1	NA	NA	NA	NA	uncharacterized LOC105393472	23.6024	23.0587	18.7513	25.5271	38.0831	27.8769	0.714991	-0.484004	0.107627	1	down	no
LOC105392773	LOC105392773	XM_011564452.1	GO:0003774(motor activity);GO:0003779(actin binding);GO:0005096(GTPase activator activity);GO:0005515(protein binding);GO:0005524(ATP binding);GO:0005829(cytosol);GO:0007601(visual perception);GO:0016021(integral component of membrane);GO:0016461(unconventional myosin complex);GO:0035556(intracellular signal transduction);GO:0043547(positive regulation of GTPase activity);GO:0046872(metal ion bin…	04666(Fc gamma R-mediated phagocytosis)	NA	NA	unconventional myosin-IXa-like	0.586585	1.53655	0.525211	0.889155	2.60681	1.20085	0.563859	-0.826593	0.107785	1	down	no
LOC105380456	LOC105380456	XM_011550024.1	GO:0003774(motor activity);GO:0005515(protein binding);GO:0005524(ATP binding);GO:0006886(intracellular protein transport);GO:0007391(dorsal closure);GO:0016459(myosin complex);GO:0016461(unconventional myosin complex);GO:0030175(filopodium);GO:0042623(ATPase activity, coupled);GO:0043025(neuronal cell body);GO:0046847(filopodium assembly)	04666(Fc gamma R-mediated phagocytosis)	NA	NA	unconventional myosin-VIIa-like	0.585816	1.33434	0.615122	0.892517	2.53578	0.972694	0.57607	-0.795685	0.107843	1	down	no
LOC105385400	LOC105385400	XM_011555776.1	GO:0004222(metalloendopeptidase activity);GO:0005654(nucleoplasm);GO:0005750(mitochondrial respiratory chain complex III);GO:0006122(mitochondrial electron transport, ubiquinol to cytochrome c);GO:0008270(zinc ion binding);GO:0009060(aerobic respiration);GO:0016485(protein processing);GO:0043209(myelin sheath);GO:0070062(extracellular exosome)	00190(Oxidative phosphorylation)	K00415	NA	cytochrome b-c1 complex subunit 2%2C mitochondrial-like	1.07311	0.412499	1.50359	0.597739	0.348624	0.722463	1.7912	0.840924	0.10814	1	up	no
MSTRG.10302	LOC105389435	XM_011560539.1	GO:0005874(microtubule);GO:0030425(dendrite);GO:0043025(neuronal cell body);GO:0043195(terminal bouton);GO:0048814(regulation of dendrite morphogenesis);GO:0051124(synaptic growth at neuromuscular junction)	NA	NA	NA	EF-hand domain-containing family member C2-like	4.96504	4.39238	3.83281	3.9969	2.81466	3.15869	1.32296	0.403769	0.108244	1	up	no
MSTRG.76	LOC105381931	XM_011551778.1	GO:0004872(receptor activity);GO:0005615(extracellular space);GO:0005887(integral component of plasma membrane);GO:0007158(neuron cell-cell adhesion);GO:0007416(synapse assembly);GO:0009986(cell surface);GO:0042043(neurexin family protein binding);GO:0045202(synapse);GO:0050804(modulation of synaptic transmission);GO:0052689(carboxylic ester hydrolase activity)	00983(Drug metabolism - other enzymes)	NA	NA	acetylcholinesterase-like	4.52957	6.67611	4.25115	6.61948	8.6631	6.66146	0.704375	-0.505585	0.108252	1	down	no
MSTRG.3153	LOC105380639	MSTRG.3153.1	NA	NA	NA	NA		6.69635	4.32913	3.46294	1.84369	4.65693	2.4812	1.61308	0.68982	0.108254	1	up	no
MSTRG.4942		MSTRG.4942.1	NA	NA	NA	NA		0.787288	1.84426	1.08623	2.5677	2.36144	1.49134	0.57905	-0.788239	0.108303	1	down	no
MSTRG.9090	LOC105387889	XR_960789.1	NA	NA	K00728	EC:2.4.1.109	uncharacterized LOC105387889	10.5411	9.00976	7.1461	7.42591	6.7176	6.25571	1.30873	0.388163	0.108348	1	up	no
MSTRG.12284		MSTRG.12284.1	NA	NA	NA	NA		7.96147	2.31114	3.7079	2.81835	3.21494	2.16946	1.70437	0.769237	0.108459	1	up	no
MSTRG.14430	LOC105394557	XM_011566463.1	GO:0005615(extracellular space);GO:0031594(neuromuscular junction)	NA	NA	NA	tyrosine-protein kinase receptor TYRO3-like	1.20017	0.685897	2.04875	0.717636	1.19971	0.298148	1.77604	0.828666	0.108543	1	up	no
MSTRG.7939	LOC105386481	XM_011557044.1;XM_011557042.1;XM_011557043.1	NA	NA	NA	NA	uncharacterized LOC105386481%2C transcript variant X3	6.84404	4.83156	5.02073	4.92863	2.90364	4.52265	1.35139	0.434445	0.108577	1	up	no
LOC105396723	LOC105396723	XM_011568729.1	NA	00670(One carbon pool by folate)	NA	NA	uncharacterized LOC105396723	0.612016	0.391323	0.582869	0.320409	0.385087	0.316041	1.55277	0.634841	0.108913	1	up	no
MSTRG.542	LOC105382919	XM_011552903.1	NA	NA	NA	NA	fatty acid-binding protein%2C liver-like	149.5	197.106	200.339	232.468	226.164	277.371	0.743129	-0.428316	0.108957	1	down	no
LOC105391726	LOC105391726	XM_011563263.1	GO:0005215(transporter activity);GO:0005524(ATP binding);GO:0042626(ATPase activity, coupled to transmembrane movement of substances);GO:0043190(ATP-binding cassette (ABC) transporter complex);GO:0055085(transmembrane transport)	02010(ABC transporters)	K05673	NA	probable multidrug resistance-associated protein lethal(2)03659	0.422916	0.852221	0.896513	1.01313	1.33295	1.02431	0.644332	-0.634123	0.10908	1	down	no
MSTRG.7185	LOC105385600	MSTRG.7185.1	NA	NA	NA	NA		15.8097	16.6134	19.7401	11.5546	14.0572	15.6154	1.26526	0.339437	0.109164	1	up	no
LOC105383480	LOC105383480	XM_011553526.1	GO:0006915(apoptotic process);GO:0006919(activation of cysteine-type endopeptidase activity involved in apoptotic process);GO:0030992(intraciliary transport particle B);GO:0036064(ciliary basal body);GO:0042981(regulation of apoptotic process)	05016(Huntington's disease)	NA	NA	intraflagellar transport protein 57 homolog	1.39329	0.928007	0.471515	0.518675	0.675496	0.462961	1.68533	0.753028	0.109322	1	up	no
MSTRG.6717	LOC105385034	XM_011555349.1	NA	NA	NA	NA	dentin sialophosphoprotein-like	0.147417	0.487869	0.233478	0.500555	0.692476	0.42212	0.537884	-0.894633	0.109324	1	down	no
MSTRG.4165	LOC105381884	MSTRG.4165.1	NA	NA	NA	NA		11.8772	15.2236	9.18191	9.76007	6.38303	9.04304	1.44058	0.52665	0.109465	1	up	no
MSTRG.13549	LOC105393459	XM_011565223.1;MSTRG.13549.2	GO:0000139(Golgi membrane);GO:0003924(GTPase activity);GO:0005525(GTP binding);GO:0005634(nucleus);GO:0005765(lysosomal membrane);GO:0005789(endoplasmic reticulum membrane);GO:0007030(Golgi organization);GO:0007264(small GTPase mediated signal transduction);GO:0015031(protein transport);GO:0016192(vesicle-mediated transport);GO:0019003(GDP binding);GO:0033116(endoplasmic reticulum-Golgi intermedi…	04152(AMPK signaling pathway)	NA	NA	ras-related protein Rab-2A-like	1.93812	4.49923	4.92618	5.8473	6.88513	5.19181	0.633976	-0.657501	0.10955	1	down	no
MSTRG.485	LOC105383223	XM_011553253.1	GO:0006338(chromatin remodeling);GO:0006351(transcription, DNA-templated);GO:0006355(regulation of transcription, DNA-templated)	NA	NA	NA	actin-related protein 8-like	1.51252	1.47247	1.14841	2.35278	2.07335	2.00782	0.642436	-0.638375	0.109555	1	down	no
MSTRG.9347	LOC105388212	XM_011559085.1	GO:0071011(precatalytic spliceosome)	03040(Spliceosome)	K12846	NA	U4/U6.U5 small nuclear ribonucleoprotein 27 kDa protein	6.89403	7.89714	6.52503	9.83525	12.7088	7.26855	0.715006	-0.483972	0.109593	1	down	no
MSTRG.35	LOC105388259	XM_011559498.1;XM_011560228.1	GO:0003674(molecular_function);GO:0005575(cellular_component);GO:0008150(biological_process);GO:0008150(biological_process)	05410(Hypertrophic cardiomyopathy (HCM));05414(Dilated cardiomyopathy (DCM));05414(Dilated cardiomyopathy (DCM))	NA	NA	B-cell receptor CD22-like%2C transcript variant X1	1.01716	0.89985	0.848498	1.48794	1.65449	1.01215	0.665651	-0.587162	0.109642	1	down	no
MSTRG.9482	LOC105388369;LOC105388368	MSTRG.9482.1;XM_011559265.1;XM_011559264.1;MSTRG.9482.3	NA	NA	NA	NA	uncharacterized LOC105388369;uncharacterized LOC105388368	115.548	101.5	149.782	165.487	142.437	194.819	0.729657	-0.45471	0.109839	1	down	no
MSTRG.11957	LOC105391538	XM_011563025.1	GO:0004972(NMDA glutamate receptor activity);GO:0010906(regulation of glucose metabolic process);GO:0017146(NMDA selective glutamate receptor complex)	05014(Amyotrophic lateral sclerosis (ALS))	NA	NA	protein lifeguard 1-like	3.55716	6.13808	5.64467	5.91623	7.45491	9.27993	0.677227	-0.56229	0.109964	1	down	no
MSTRG.14896	LOC105395222	MSTRG.14896.1	NA	NA	NA	NA		24.9598	24.0795	23.2221	15.6196	27.2051	9.82075	1.37261	0.456918	0.109998	1	up	no
MSTRG.14736	LOC105394999	XM_011566916.1	NA	NA	NA	NA	prisilkin-39-like	29.3801	91.318	124.82	137.42	54.1842	250.129	0.555805	-0.847348	0.110151	1	down	no
MSTRG.1497	LOC105394731	XM_011566645.1	GO:0003674(molecular_function);GO:0005615(extracellular space);GO:0032504(multicellular organism reproduction)	NA	K01106	EC:3.1.3.56	uncharacterized LOC105394731	4.7963	3.51859	2.66274	2.55733	2.75409	3.00319	1.32028	0.400847	0.110154	1	up	no
MSTRG.4141	LOC105381809	XM_011551610.1	NA	NA	NA	NA	uncharacterized LOC105381809	6.58166	5.44311	3.17787	4.2661	3.537	3.18688	1.38332	0.468135	0.110187	1	up	no
MSTRG.10182	LOC105389293	XM_011560389.1;XM_011560390.1	GO:0004550(nucleoside diphosphate kinase activity);GO:0005622(intracellular)	00230(Purine metabolism);00240(Pyrimidine metabolism)	K00940	EC:2.7.4.6	nucleoside diphosphate kinase 7-like%2C transcript variant X1	2.05444	1.58995	1.92476	1.57258	1.4227	0.805328	1.46533	0.551225	0.110278	1	up	no
LOC105391593	LOC105391593	XM_011563093.1	NA	NA	NA	NA	uncharacterized LOC105391593	2.27268	3.3496	3.95345	1.86679	2.23429	2.28131	1.50033	0.585284	0.110301	1	up	no
MSTRG.7626	LOC105386094	XM_011556590.1	NA	NA	NA	NA	uncharacterized LOC105386094	17.4958	19.2001	19.6483	38.9049	35.2677	12.9134	0.646996	-0.628172	0.110323	1	down	no
MSTRG.9069	LOC105387858	XM_011558644.1;XM_011558643.1	GO:0005509(calcium ion binding);GO:0005509(calcium ion binding)	NA	NA	NA	uncharacterized LOC105387858%2C transcript variant X1	4.06642	2.69245	3.06143	2.47058	2.06732	2.74085	1.34917	0.432077	0.110433	1	up	no
MSTRG.15827		MSTRG.15827.1	NA	NA	NA	NA		2.61772	4.49394	2.6968	4.12776	5.54785	5.49061	0.646731	-0.628763	0.110764	1	down	no
MSTRG.15322	LOC105395921	MSTRG.15322.1	NA	NA	NA	NA		4.45399	2.92343	3.24555	6.6688	6.5354	3.31653	0.643008	-0.637091	0.11092	1	down	no
MSTRG.8445	LOC105387108	XM_011557784.1	NA	NA	NA	NA	uncharacterized LOC105387108	16.701	14.1167	11.9732	12.8258	7.89479	11.5815	1.32471	0.405678	0.111183	1	up	no
MSTRG.14563	LOC105394768	XM_011566680.1	NA	NA	NA	NA	uncharacterized LOC105394768	13.1409	10.2273	9.53305	10.7559	7.39333	6.90958	1.31296	0.392824	0.111368	1	up	no
MSTRG.14666	LOC105394918	XM_011566840.1	GO:0000285(1-phosphatidylinositol-3-phosphate 5-kinase activity);GO:0005524(ATP binding);GO:0005768(endosome);GO:0008270(zinc ion binding);GO:0008333(endosome to lysosome transport);GO:0012506(vesicle membrane);GO:0016308(1-phosphatidylinositol-4-phosphate 5-kinase activity);GO:0016310(phosphorylation);GO:0035556(intracellular signal transduction);GO:0046854(phosphatidylinositol phosphorylation);…	00562(Inositol phosphate metabolism);04070(Phosphatidylinositol signaling system);04145(Phagosome)	K00921	EC:2.7.1.150	putative 1-phosphatidylinositol 3-phosphate 5-kinase	0.23657	0.263637	0.291829	0.44976	0.410082	0.422772	0.617517	-0.695449	0.111422	1	down	no
MSTRG.5715	LOC105383791	XM_011553903.1	GO:0003674(molecular_function);GO:0005743(mitochondrial inner membrane);GO:0006850(mitochondrial pyruvate transport);GO:0016020(membrane);GO:0016021(integral component of membrane)	NA	NA	NA	mitochondrial pyruvate carrier 1-like	9.40744	10.9292	7.92655	13.3769	13.5021	12.5895	0.716095	-0.481776	0.111473	1	down	no
MSTRG.5438	LOC105383461	XM_011553509.1	GO:0016021(integral component of membrane);GO:0042626(ATPase activity, coupled to transmembrane movement of substances);GO:0055085(transmembrane transport)	02010(ABC transporters)	K05658	EC:3.6.3.44	multidrug resistance protein homolog 49-like	0.407236	0.616953	0.614548	0.674149	0.788128	0.999558	0.665657	-0.58715	0.111567	1	down	no
MSTRG.4729	LOC105382529	XM_011552428.1;XM_011552427.1;XM_011552429.1	NA	NA	NA	NA	zinc finger homeobox protein 4-like%2C transcript variant X3	18.8785	12.552	10.3347	11.2054	9.40571	10.3939	1.34705	0.429804	0.111583	1	up	no
MSTRG.12432	LOC105392111	XM_011563705.1	GO:0003682(chromatin binding);GO:0005634(nucleus);GO:0006260(DNA replication);GO:0006355(regulation of transcription, DNA-templated);GO:0007379(segment specification)	NA	NA	NA	uncharacterized LOC105392111	0.814425	0.728184	1.12185	0.720659	0.68168	0.430796	1.4535	0.539529	0.111674	1	up	no
LOC105396758	LOC105396758	XM_011568765.1	GO:0000122(negative regulation of transcription from RNA polymerase II promoter);GO:0005634(nucleus);GO:0006346(methylation-dependent chromatin silencing);GO:0008327(methyl-CpG binding)	NA	NA	NA	uncharacterized LOC105396758	1.1533	1.6629	0.998397	1.99676	2.11245	1.61587	0.666295	-0.585767	0.111678	1	down	no
MSTRG.5555	LOC105383583	MSTRG.5555.1;XR_960590.1	NA	NA	NA	NA	uncharacterized LOC105383583	4.59911	3.51843	3.06717	3.2931	2.13308	2.98947	1.32903	0.410379	0.11173	1	up	no
MSTRG.5481	LOC105383486	XM_011553534.1	GO:0003333(amino acid transmembrane transport);GO:0015171(amino acid transmembrane transporter activity);GO:0040007(growth)	04974(Protein digestion and absorption)	NA	NA	proton-coupled amino acid transporter 4-like	5.83511	4.0112	4.90144	4.10635	2.94892	3.91557	1.34427	0.42682	0.111769	1	up	no
MSTRG.9569	LOC105388479	XM_011559395.1;XM_011559396.1;XM_011559397.1	GO:0002088(lens development in camera-type eye);GO:0006810(transport);GO:0006886(intracellular protein transport);GO:0015031(protein transport);GO:0016192(vesicle-mediated transport);GO:0030117(membrane coat);GO:0030117(membrane coat)	NA	NA	NA	coatomer subunit zeta-1%2C transcript variant X2	73.7905	72.8041	63.5411	51.0753	70.2008	47.8952	1.24215	0.312837	0.112024	1	up	no
MSTRG.15716		MSTRG.15716.1	NA	NA	NA	NA		2.1957	3.25169	2.93588	4.8222	6.02083	2.64318	0.621618	-0.685899	0.112112	1	down	no
MSTRG.1501	LOC105394773	MSTRG.1501.1	NA	NA	NA	NA		1.66408	5.2425	5.09587	5.98967	3.66418	12.2216	0.548673	-0.865982	0.112135	1	down	no
MSTRG.11713	LOC105391254	XM_011562716.1	NA	NA	NA	NA	uncharacterized LOC105391254	38.7165	18.1531	22.3633	15.4284	29.2429	11.1174	1.42023	0.506126	0.112184	1	up	no
MSTRG.5511	LOC105383527	XM_011553584.1;XM_011553585.1;MSTRG.5511.3;MSTRG.5511.4;XM_011553586.1	NA	NA	NA	NA	uncharacterized LOC105383527%2C transcript variant X4	11.2134	6.67245	3.28399	13.8752	6.94397	12.5025	0.635318	-0.65445	0.112281	1	down	no
MSTRG.13197	LOC105393049	XM_011564761.1	GO:0046872(metal ion binding)	00562(Inositol phosphate metabolism);04070(Phosphatidylinositol signaling system)	K17603	NA	lateral signaling target protein 2 homolog	0.788051	0.846654	1.12222	1.48907	1.41285	1.15313	0.679875	-0.556658	0.112291	1	down	no
MSTRG.7221	LOC105385622	XM_011556034.1	GO:0003868(4-hydroxyphenylpyruvate dioxygenase activity);GO:0009072(aromatic amino acid family metabolic process);GO:0055114(oxidation-reduction process)	00350(Tyrosine metabolism);00360(Phenylalanine metabolism);00130(Ubiquinone and other terpenoid-quinone biosynthesis)	K00457	EC:1.13.11.27	4-hydroxyphenylpyruvate dioxygenase-like	16.9116	30.749	20.1542	39.3879	29.1779	26.7513	0.711466	-0.491134	0.11233	1	down	no
MSTRG.9514	LOC105388430	MSTRG.9514.1	NA	NA	NA	NA		11.5169	8.39721	7.52208	4.67084	7.68363	6.94271	1.42177	0.507691	0.112331	1	up	no
LOC105391262	LOC105391262	XM_011562725.1	GO:0008745(N-acetylmuramoyl-L-alanine amidase activity);GO:0009253(peptidoglycan catabolic process)	NA	K05293	NA	uncharacterized LOC105391262	0.592712	0.928485	0.839185	1.03804	1.71768	1.20067	0.5966	-0.745165	0.112499	1	down	no
MSTRG.3999	LOC105381657	XM_011551436.1	GO:0003998(acylphosphatase activity)	00620(Pyruvate metabolism)	K01512	EC:3.6.1.7	acylphosphatase-1-like	15.7647	8.22707	12.5973	9.89164	5.92846	9.80241	1.42801	0.514003	0.112768	1	up	no
MSTRG.13422	LOC105393311	XM_011565047.1	GO:0005737(cytoplasm);GO:0006480(N-terminal protein amino acid methylation);GO:0071885(N-terminal protein N-methyltransferase activity)	04115(p53 signaling pathway)	NA	NA	N-terminal Xaa-Pro-Lys N-methyltransferase 1-like	8.17035	6.22385	6.46507	6.33811	4.39952	4.94356	1.33021	0.411653	0.112854	1	up	no
MSTRG.2630		MSTRG.2630.1	NA	NA	NA	NA		2.75196	4.28586	3.9066	6.43547	4.59106	4.94505	0.685243	-0.545312	0.11286	1	down	no
MSTRG.4911	LOC105382734	XM_011552665.1;MSTRG.4911.2;XM_011552662.1;MSTRG.4911.1;XM_011552663.1;XM_011552668.1;XM_011552667.1	NA	NA	NA	NA	uncharacterized LOC105382734%2C transcript variant X2	11.2339	9.12406	8.15011	8.88442	5.74212	7.49052	1.28896	0.366213	0.112864	1	up	no
MSTRG.10742	LOC105390055	XM_011561286.1	NA	NA	NA	NA	fatty acid-binding protein%2C liver-like	376.84	475.621	503.477	583.265	563.037	662.536	0.749618	-0.415773	0.112881	1	down	no
MSTRG.3499	LOC105381138	MSTRG.3499.1	NA	NA	NA	NA		11.2077	9.61296	8.24931	9.55361	6.00682	6.10842	1.34156	0.423906	0.113001	1	up	no
LOC105392954	LOC105392954	XM_011564648.1	NA	NA	NA	NA	uncharacterized LOC105392954	2.49121	2.18029	1.25005	1.37105	1.23048	1.14455	1.58073	0.660595	0.113212	1	up	no
MSTRG.14745	LOC105395005	XM_011566922.1	NA	NA	NA	NA	uncharacterized LOC105395005	517.507	666.29	937.967	384.477	325.417	772.028	1.43176	0.517794	0.113445	1	up	no
LOC105395947	LOC105395947	XM_011567930.1	GO:0003924(GTPase activity);GO:0005096(GTPase activator activity);GO:0005515(protein binding);GO:0005525(GTP binding);GO:0005794(Golgi apparatus);GO:0016192(vesicle-mediated transport);GO:0031982(vesicle);GO:0032482(Rab protein signal transduction);GO:0043025(neuronal cell body);GO:0045202(synapse);GO:0055037(recycling endosome)	05134(Legionellosis)	NA	NA	ras-related protein Rab-43-like	1.97355	2.21757	1.342	3.24361	3.07902	2.09888	0.657023	-0.605983	0.113519	1	down	no
MSTRG.8724	LOC105387460	MSTRG.8724.1	NA	NA	NA	NA		22.299	14.4999	13.6705	14.2903	9.69579	13.0626	1.36225	0.445989	0.113523	1	up	no
MSTRG.6995	LOC105385375	XM_011555734.1;XM_011555737.1;XM_011555735.1;XM_011555738.1	GO:0003841(1-acylglycerol-3-phosphate O-acyltransferase activity);GO:0003841(1-acylglycerol-3-phosphate O-acyltransferase activity)	00561(Glycerolipid metabolism);00564(Glycerophospholipid metabolism);00564(Glycerophospholipid metabolism)	K13509	EC:2.3.1.51	1-acyl-sn-glycerol-3-phosphate acyltransferase alpha%2C transcript variant X3	13.9267	12.4495	14.8644	22.3694	19.0665	15.3363	0.726423	-0.461119	0.113604	1	down	no
MSTRG.10990	LOC105390340	XM_011561626.1	GO:0004842(ubiquitin-protein transferase activity);GO:0006915(apoptotic process);GO:0019005(SCF ubiquitin ligase complex);GO:0031146(SCF-dependent proteasomal ubiquitin-dependent protein catabolic process);GO:0036435(K48-linked polyubiquitin binding);GO:0043161(proteasome-mediated ubiquitin-dependent protein catabolic process);GO:0046668(regulation of retinal cell programmed cell death);GO:190169…	04141(Protein processing in endoplasmic reticulum);04120(Ubiquitin mediated proteolysis)	K06689	EC:2.3.2.23	uncharacterized LOC105390340	0.618403	0.415783	1.02225	1.12661	1.41231	1.11811	0.562324	-0.830526	0.113731	1	down	no
MSTRG.15225	LOC105395739	XM_011567701.1;XM_011567698.1;XM_011567700.1;XM_011567699.1	NA	04530(Tight junction);04270(Vascular smooth muscle contraction);04270(Vascular smooth muscle contraction)	NA	NA	myosin-11-like%2C transcript variant X2	3.05789	1.93071	2.69565	2.0876	1.34856	2.10537	1.38666	0.471618	0.113743	1	up	no
MSTRG.11826	LOC105391387	MSTRG.11826.4;XM_011562853.1;XM_011562854.1;MSTRG.11826.3	NA	NA	NA	NA	uncharacterized LOC105391387%2C transcript variant X2	26.6101	18.7666	23.593	34.9057	36.9251	23.2323	0.725515	-0.462922	0.113747	1	down	no
MSTRG.4028		MSTRG.4028.1	NA	NA	NA	NA		5.21891	3.22146	3.74718	6.85246	6.72438	4.52534	0.673264	-0.570756	0.113756	1	down	no
MSTRG.11236	LOC105390669	MSTRG.11236.1	NA	NA	NA	NA		4.35764	6.81218	4.40321	7.63165	8.16828	6.01834	0.713761	-0.486487	0.11377	1	down	no
MSTRG.10603	LOC105389845	XM_011561041.1	GO:0003674(molecular_function);GO:0005575(cellular_component);GO:0008150(biological_process)	NA	NA	NA	uncharacterized LOC105389845	10.4219	7.8072	7.0808	7.71344	4.30027	6.46962	1.36934	0.453478	0.113777	1	up	no
MSTRG.4725	LOC105382523	XM_011552419.1;XM_011552418.1	NA	NA	NA	NA	uncharacterized LOC105382523%2C transcript variant X2	8.61173	6.09513	5.83966	6.62111	3.4097	4.87804	1.37814	0.462725	0.113809	1	up	no
MSTRG.3532	LOC105381106	MSTRG.3532.1	NA	NA	NA	NA		5.52243	5.06301	6.70663	3.86877	3.44976	4.63305	1.44685	0.53291	0.113916	1	up	no
MSTRG.14679	LOC105394926	XM_011566847.1	GO:0004854(xanthine dehydrogenase activity);GO:0005829(cytosol);GO:0009115(xanthine catabolic process);GO:0016903(oxidoreductase activity, acting on the aldehyde or oxo group of donors);GO:0050660(flavin adenine dinucleotide binding)	00230(Purine metabolism);00232(Caffeine metabolism);00983(Drug metabolism - other enzymes);04146(Peroxisome)	K00106	EC:1.17.1.4;EC:1.17.3.2	dyslexia-associated protein KIAA0319-like protein	3.19365	4.90412	4.4059	3.37785	2.97766	2.32464	1.44049	0.52656	0.114386	1	up	no
MSTRG.2801	LOC105380283	XM_011549806.1	NA	NA	NA	NA	uncharacterized LOC105380283	4.6851	4.37885	2.8032	2.16565	0.973595	3.57208	1.76823	0.822304	0.11441	1	up	no
MSTRG.3946	LOC105381594	XM_011551358.1	GO:0005515(protein binding)	NA	K05633	EC:2.3.2.26	tetratricopeptide repeat protein 39B-like	3.75801	4.43627	3.18963	5.55758	6.90659	3.71627	0.70356	-0.507254	0.114445	1	down	no
MSTRG.2197	LOC105398428	XM_011570538.1	NA	NA	NA	NA	cuticle protein 16.5%2C isoform A-like	8.51321	11.5355	13.753	6.20143	3.94277	12.0671	1.52183	0.605804	0.11458	1	up	no
LOC105392337	LOC105392337	XM_011563947.1	GO:0003677(DNA binding);GO:0005634(nucleus);GO:0006351(transcription, DNA-templated);GO:0006355(regulation of transcription, DNA-templated);GO:0046872(metal ion binding)	NA	NA	NA	zinc finger and SCAN domain-containing protein 12-like	1.71757	1.11509	1.08484	1.2633	0.575907	0.730594	1.52444	0.608276	0.114694	1	up	no
MSTRG.2730	LOC105380135	XM_011549638.1	NA	NA	NA	NA	uncharacterized LOC105380135	11.5742	9.56687	12.2573	10.0206	9.06765	6.81123	1.28954	0.366855	0.114866	1	up	no
MSTRG.2790	LOC105380232	MSTRG.2790.1	NA	NA	NA	NA		7.50776	5.94419	6.05672	5.10847	4.34706	4.76512	1.37186	0.456129	0.115063	1	up	no
MSTRG.4634	LOC105382441	XM_011552321.1	GO:0002224(toll-like receptor signaling pathway);GO:0004872(receptor activity);GO:0005887(integral component of plasma membrane);GO:0006954(inflammatory response)	04620(Toll-like receptor signaling pathway)	NA	NA	chaoptin	16.8645	20.2964	10.1738	10.4955	15.8985	9.75996	1.30925	0.388745	0.115088	1	up	no
MSTRG.4290	LOC105382040	XR_960509.1	NA	NA	NA	NA	uncharacterized LOC105382040	4.54103	4.49385	4.59368	6.41179	10.36	6.36138	0.589134	-0.763332	0.115118	1	down	no
MSTRG.2334	LOC105398572	XM_011570701.1	GO:0006486(protein glycosylation);GO:0008499(UDP-galactose:beta-N-acetylglucosamine beta-1,3-galactosyltransferase activity);GO:0016020(membrane);GO:0016757(transferase activity, transferring glycosyl groups)	00601(Glycosphingolipid biosynthesis - lacto and neolacto series)	K03766	EC:2.4.1.206	beta-1%2C3-galactosyltransferase 5-like	4.7327	3.63675	3.24572	2.77523	2.15609	3.32175	1.40738	0.493007	0.115151	1	up	no
MSTRG.9037		MSTRG.9037.1	NA	NA	NA	NA		2.39355	4.4079	2.2976	3.71747	6.3298	4.53929	0.623797	-0.680852	0.115166	1	down	no
MSTRG.5764	LOC105383851	XR_960600.1	NA	NA	NA	NA	uncharacterized LOC105383851	13.6429	20.9066	17.836	17.5913	22.6726	34.9403	0.696578	-0.521644	0.115312	1	down	no
MSTRG.1347	LOC105392939	MSTRG.1347.1	NA	NA	NA	NA		8.09084	7.07581	10.7094	9.76378	0.240454	1.05843	2.33905	1.22592	0.115391	1	up	no
MSTRG.12421	LOC105392105	MSTRG.12421.1	NA	NA	NA	NA		1529.66	1384.83	541.65	914.558	983.7	606.184	1.38	0.464671	0.115392	1	up	no
MSTRG.10484		MSTRG.10484.1	NA	NA	NA	NA		7.275	7.33279	6.08806	3.77548	5.21341	5.41727	1.4366	0.522655	0.11557	1	up	no
MSTRG.11288		MSTRG.11288.1	NA	NA	NA	NA		3.49747	1.25293	9.97366	8.47098	14.8465	6.37026	0.495964	-1.01169	0.115668	1	down	no
LOC105382175	LOC105382175	XM_011552020.1	GO:0004252(serine-type endopeptidase activity);GO:0005737(cytoplasm)	04080(Neuroactive ligand-receptor interaction)	NA	NA	trypsin CFT-1-like	3.39059	3.25393	2.70199	2.20906	2.86759	1.49097	1.42312	0.50906	0.115754	1	up	no
MSTRG.1398	LOC105393153	XM_011564890.1;XM_011564897.1	GO:0005096(GTPase activator activity);GO:0007430(terminal branching, open tracheal system);GO:0030175(filopodium);GO:0035149(lumen formation, open tracheal system);GO:0043087(regulation of GTPase activity);GO:0060439(trachea morphogenesis);GO:0060439(trachea morphogenesis)	NA	NA	NA	carabin-like%2C transcript variant X1	0.917926	1.82141	0.606177	1.84439	2.27776	1.46512	0.598774	-0.739916	0.1159	1	down	no
MSTRG.1251	LOC105392066	XM_011563659.1	NA	NA	NA	NA	fibrous sheath-interacting protein 2-like	2.81416	1.99816	1.14325	1.70959	1.1703	0.775126	1.62943	0.704365	0.116015	1	up	no
MSTRG.11238		MSTRG.11238.1	NA	NA	NA	NA		7.93692	4.47775	6.76341	4.54532	3.68393	4.22482	1.5399	0.62284	0.116015	1	up	no
MSTRG.11547	LOC105391054	LOC105391054	NA	NA	NA	NA		4.63717	3.3926	2.68835	2.90198	1.65831	2.95322	1.42651	0.512492	0.116164	1	up	no
MSTRG.7880	LOC105386427	XM_011556987.1	GO:0004306(ethanolamine-phosphate cytidylyltransferase activity);GO:0009058(biosynthetic process);GO:0042439(ethanolamine-containing compound metabolic process)	00564(Glycerophospholipid metabolism)	K00967	EC:2.7.7.14	ethanolamine-phosphate cytidylyltransferase	8.67138	16.584	10.9092	16.4195	19.3522	14.6823	0.716782	-0.480394	0.116179	1	down	no
MSTRG.15799	LOC105397179	XM_011569190.1	NA	NA	NA	NA	probable G-protein coupled receptor Mth-like 3	2.66625	3.95318	2.76799	5.71962	5.38837	2.82952	0.673537	-0.570172	0.11626	1	down	no
MSTRG.6316	LOC105384520	XM_011554784.1	NA	NA	NA	NA	uncharacterized LOC105384520	8.01453	4.78585	6.38647	5.23089	3.0783	5.12087	1.42865	0.514652	0.116477	1	up	no
LOC105386422	LOC105386422	XM_011556980.1	NA	NA	NA	NA	uncharacterized LOC105386422	1.17081	0.518762	0.608667	0.601077	0.471572	0.329437	1.63916	0.712955	0.11671	1	up	no
MSTRG.3180	LOC105380748	MSTRG.3180.1	NA	NA	NA	NA		2.67493	2.25292	2.63332	3.21433	4.47646	4.93431	0.598899	-0.739614	0.116776	1	down	no
MSTRG.5068	LOC105382925	XM_011552911.1	GO:0005215(transporter activity);GO:0005879(axonemal microtubule);GO:0005929(cilium);GO:0018095(protein polyglutamylation);GO:0030992(intraciliary transport particle B);GO:0042073(intraciliary transport);GO:0042384(cilium assembly)	04146(Peroxisome)	NA	NA	tetratricopeptide repeat protein 30A	3.06473	3.20701	2.60802	2.47671	1.47928	2.50866	1.37359	0.457949	0.116818	1	up	no
MSTRG.9859	LOC105388863	XR_960827.1	NA	NA	K00699	EC:2.4.1.17	uncharacterized LOC105388863	1.43088	1.30226	1.69802	2.46292	1.86037	2.44102	0.655079	-0.610258	0.117038	1	down	no
MSTRG.1100	LOC105390003	XM_011561227.1;XM_011561216.1	GO:0004252(serine-type endopeptidase activity);GO:0006508(proteolysis);GO:0045087(innate immune response);GO:0045087(innate immune response)	04080(Neuroactive ligand-receptor interaction);04810(Regulation of actin cytoskeleton);04810(Regulation of actin cytoskeleton)	K20674	EC:3.4.21.-	transmembrane protease serine 9-like%2C transcript variant X2	3.19968	5.65074	6.79947	6.90239	5.87413	10.5109	0.672033	-0.573396	0.117102	1	down	no
MSTRG.15793	LOC105397179	MSTRG.15793.1	NA	NA	NA	NA		3.91155	5.51227	4.45456	9.39598	6.76215	6.38512	0.615634	-0.699856	0.117198	1	down	no
MSTRG.7321	LOC105385739	XM_011556166.1	GO:0004181(metallocarboxypeptidase activity);GO:0005615(extracellular space)	04972(Pancreatic secretion);04974(Protein digestion and absorption)	NA	NA	zinc carboxypeptidase-like	10.764	8.50834	7.24951	7.96771	5.38881	6.66711	1.32452	0.405475	0.117288	1	up	no
MSTRG.1597	LOC105395805	XM_011567785.1;XM_011567778.1;XM_011567770.1	GO:0000166(nucleotide binding);GO:0004672(protein kinase activity);GO:0004674(protein serine/threonine kinase activity);GO:0005524(ATP binding);GO:0005634(nucleus);GO:0005737(cytoplasm);GO:0006468(protein phosphorylation);GO:0006897(endocytosis);GO:0008360(regulation of cell shape);GO:0016055(Wnt signaling pathway);GO:0016301(kinase activity);GO:0016310(phosphorylation);GO:0016740(transferase act…	04310(Wnt signaling pathway);04340(Hedgehog signaling pathway);04391(Hippo signaling pathway -fly);04068(FoxO signaling pathway);04711(Circadian rhythm - fly);04711(Circadian rhythm - fly)	K08960	EC:2.7.11.1	casein kinase I isoform delta-B-like%2C transcript variant X2	5.98798	6.10817	5.21148	10.3122	9.01254	5.23448	0.70473	-0.504857	0.117418	1	down	no
MSTRG.6542	LOC105384807	MSTRG.6542.1;XM_011555086.1;MSTRG.6542.2;MSTRG.6542.3	GO:0003723(RNA binding);GO:0005739(mitochondrion);GO:0005794(Golgi apparatus);GO:0006099(tricarboxylic acid cycle);GO:0006403(RNA localization);GO:0007298(border follicle cell migration);GO:0007616(long-term memory);GO:0008069(dorsal/ventral axis specification, ovarian follicular epithelium);GO:0008070(maternal determination of dorsal/ventral axis, ovarian follicular epithelium, germ-line encoded…	NA	NA	NA	A-kinase anchor protein 1%2C mitochondrial	50.1136	50.0014	57.0729	64.044	108.035	49.1196	0.710619	-0.492853	0.117631	1	down	no
LOC105384145	LOC105384145	XM_011554336.1	NA	NA	NA	NA	uncharacterized LOC105384145	2.34243	1.36986	1.61201	0.89333	1.60145	0.834409	1.59928	0.677424	0.117786	1	up	no
LOC105393787	LOC105393787	XM_011565588.1	NA	NA	NA	NA	uncharacterized LOC105393787	1.58283	1.22748	2.30322	1.34452	1.13478	0.949164	1.49149	0.576757	0.117795	1	up	no
MSTRG.9208		MSTRG.9208.1	NA	NA	NA	NA		5.13305	2.75778	5.19359	2.00843	3.63421	2.65274	1.57731	0.657468	0.117814	1	up	no
MSTRG.10339		MSTRG.10339.1	NA	NA	NA	NA		2.76335	2.43109	2.86212	4.45481	3.3125	3.50759	0.714557	-0.484879	0.117839	1	down	no
MSTRG.7725	LOC105386226	XM_011556742.1;XM_011556741.1	GO:0005070(SH3/SH2 adaptor activity);GO:0005515(protein binding);GO:0006911(phagocytosis, engulfment);GO:0007165(signal transduction);GO:0007298(border follicle cell migration);GO:0007520(myoblast fusion);GO:0032956(regulation of actin cytoskeleton organization);GO:0043087(regulation of GTPase activity);GO:0046330(positive regulation of JNK cascade);GO:0046529(imaginal disc fusion, thorax closure…	04010(MAPK signaling pathway);04012(ErbB signaling pathway);04810(Regulation of actin cytoskeleton);04510(Focal adhesion);04910(Insulin signaling pathway);04910(Insulin signaling pathway)	K04438	NA	adapter molecule Crk%2C transcript variant X2	3.24411	2.99127	3.20052	4.47217	5.11268	3.60785	0.715236	-0.483509	0.117871	1	down	no
MSTRG.10684	LOC105389959	XM_011561169.1	GO:0046922(peptide-O-fucosyltransferase activity)	00514(Other types of O-glycan biosynthesis)	K03691	EC:2.4.1.221	GDP-fucose protein O-fucosyltransferase 2	2.51059	3.29425	2.74905	3.87693	4.87692	3.32877	0.70795	-0.498281	0.117993	1	down	no
MSTRG.13804	LOC105393762	XM_011565559.1	GO:0003674(molecular_function);GO:0005575(cellular_component);GO:0008150(biological_process)	00190(Oxidative phosphorylation)	NA	NA	protein FAM92A1-A	1.25974	1.00854	1.34842	0.951754	0.805205	0.545127	1.57105	0.651733	0.118133	1	up	no
MSTRG.2236		MSTRG.2236.1	NA	NA	NA	NA		9.96487	7.86609	5.36937	5.51845	6.23085	5.86996	1.31676	0.396992	0.118227	1	up	no
MSTRG.4153	LOC105381882	XM_011551687.1	GO:0005215(transporter activity);GO:0005576(extracellular region);GO:0006810(transport);GO:0008289(lipid binding);GO:0036094(small molecule binding)	NA	NA	NA	uncharacterized LOC105381882	64.0977	75.1141	90.3127	113.26	82.9076	114.416	0.739009	-0.436337	0.118533	1	down	no
MSTRG.10049	LOC105389099	MSTRG.10049.1	NA	NA	NA	NA		5.32806	7.7659	10.1475	16.6096	9.93046	9.35064	0.647562	-0.626909	0.118637	1	down	no
MSTRG.15024	LOC105395498	XM_011567452.1;XM_011567453.1;MSTRG.15024.1	GO:0003400(regulation of COPII vesicle coating);GO:0005085(guanyl-nucleotide exchange factor activity);GO:0005096(GTPase activator activity);GO:0030176(integral component of endoplasmic reticulum membrane);GO:0043547(positive regulation of GTPase activity);GO:0043547(positive regulation of GTPase activity)	NA	NA	NA	vegetative cell wall protein gp1-like%2C transcript variant X2	286.977	296.307	209.032	182.402	219.05	231.337	1.2521	0.324351	0.118741	1	up	no
MSTRG.7095	LOC105385490	XR_960656.1;XR_960655.1;XM_011555880.1;MSTRG.7095.2	NA	04142(Lysosome);03022(Basal transcription factors);03420(Nucleotide excision repair);03420(Nucleotide excision repair)	K10848	EC:3.1.-.-	uncharacterized LOC105385490%2C transcript variant X3	1.67325	8.10715	7.5868	2.72464	4.74712	3.70385	1.55403	0.636011	0.118768	1	up	no
MSTRG.14021	LOC105394018;LOC105394019	MSTRG.14021.2;MSTRG.14021.4;MSTRG.14021.3;XM_011565854.1;XM_011565855.1	GO:0005214(structural constituent of chitin-based cuticle);GO:0008010(structural constituent of chitin-based larval cuticle);GO:0031012(extracellular matrix);GO:0040003(chitin-based cuticle development);GO:0040003(chitin-based cuticle development)	00230(Purine metabolism);00240(Pyrimidine metabolism);03020(RNA polymerase);03020(RNA polymerase)	NA	NA	adult-specific cuticular protein ACP-20-like	7.75847	10.4196	9.04191	17.4711	9.07139	12.2354	0.701946	-0.510568	0.118802	1	down	no
MSTRG.2533		MSTRG.2533.1	NA	NA	NA	NA		7.38831	3.91478	3.63344	4.60614	3.3287	2.31767	1.45687	0.542867	0.118857	1	up	no
MSTRG.6247	LOC105384445	XM_011554678.1	NA	NA	NA	NA	protein singed wings 2	0.192318	0.751694	0.425921	0.868814	0.988197	0.67945	0.540096	-0.888712	0.119188	1	down	no
MSTRG.7109	LOC105385506	XM_011555897.1	NA	01230(Biosynthesis of amino acids);00220(Arginine biosynthesis)	K00611	EC:2.1.3.3	ornithine carbamoyltransferase%2C mitochondrial-like	6.5242	5.69542	6.2463	5.23442	3.10734	5.14963	1.36872	0.452827	0.119192	1	up	no
MSTRG.9967	LOC105388974	XM_011560022.1	GO:0002164(larval development);GO:0003407(neural retina development);GO:0004181(metallocarboxypeptidase activity);GO:0005739(mitochondrion);GO:0006508(proteolysis);GO:0007005(mitochondrion organization);GO:0008270(zinc ion binding);GO:0017076(purine nucleotide binding)	04020(Calcium signaling pathway);04024(cAMP signaling pathway);04080(Neuroactive ligand-receptor interaction);04728(Dopaminergic synapse)	K05840	NA	cytosolic carboxypeptidase 2%2C transcript variant X1	0.27751	0.771667	0.234166	0.13564	0.275678	0.311403	1.77571	0.828396	0.119395	1	up	no
MSTRG.1425		MSTRG.1425.1	NA	NA	NA	NA		7.53527	6.61712	6.71995	5.05245	4.16581	5.99476	1.37201	0.456286	0.119473	1	up	no
LOC105393904	LOC105393904	XM_011565724.1	GO:0010494(cytoplasmic stress granule);GO:0010603(regulation of cytoplasmic mRNA processing body assembly);GO:0034063(stress granule assembly);GO:0044822(poly(A) RNA binding)	NA	NA	NA	ataxin-2 homolog	0.859194	1.57407	1.17752	1.46271	2.96553	1.39028	0.620567	-0.68834	0.119728	1	down	no
MSTRG.4125	LOC105381801	MSTRG.4125.1;XM_011551604.1	GO:0003824(catalytic activity)	00120(Primary bile acid biosynthesis);04146(Peroxisome)	NA	NA	succinate--hydroxymethylglutarate CoA-transferase-like	3.82047	4.05089	4.48559	5.01161	6.61519	5.48784	0.722011	-0.469907	0.120074	1	down	no
MSTRG.344		MSTRG.344.1	NA	NA	NA	NA		5.44947	2.84184	3.3083	2.86613	2.10701	2.90052	1.47322	0.55897	0.120184	1	up	no
MSTRG.3577		MSTRG.3577.1	NA	NA	NA	NA		2.32028	5.12525	4.2219	8.33383	3.37919	7.73723	0.59986	-0.737302	0.120268	1	down	no
LOC105397697	LOC105397697	XM_011569715.1	NA	NA	NA	NA	nucleolar and coiled-body phosphoprotein 1-like	0.423775	0.573609	0.418142	0.498343	1.02471	1.00394	0.560162	-0.836084	0.120309	1	down	no
MSTRG.15412		MSTRG.15412.1;MSTRG.15412.2	NA	NA	NA	NA		6.19926	7.13425	7.40433	9.57479	9.24508	9.72268	0.726558	-0.460849	0.120352	1	down	no
MSTRG.14940	LOC105395341	XR_961103.1	NA	01212(Fatty acid metabolism);00620(Pyruvate metabolism);00640(Propanoate metabolism);00061(Fatty acid biosynthesis);00254(Aflatoxin)	K11262	EC:6.4.1.2;EC:6.3.4.14	uncharacterized LOC105395341	24.3576	32.0955	32.732	37.9606	30.5475	55.2878	0.72042	-0.47309	0.120379	1	down	no
MSTRG.10104	LOC105389193	XM_011560277.1	NA	NA	NA	NA	uncharacterized LOC105389193	4.42095	5.53477	4.5206	5.72306	7.3742	7.20744	0.712954	-0.488119	0.120387	1	down	no
MSTRG.14439	LOC105394569	XM_011566474.1	GO:0005243(gap junction channel activity);GO:0005886(plasma membrane);GO:0005921(gap junction)	NA	NA	NA	innexin inx1-like	0.844874	1.55434	0.713655	1.97153	2.10848	1.00842	0.611754	-0.708976	0.120422	1	down	no
MSTRG.15031	LOC105395508	MSTRG.15031.1	NA	NA	NA	NA		4.45995	3.03411	3.44856	1.6063	3.32772	1.9569	1.58798	0.66719	0.120452	1	up	no
MSTRG.11837	LOC105391395	XM_011562861.1	GO:0003674(molecular_function);GO:0005575(cellular_component);GO:0008150(biological_process)	NA	NA	NA	WD repeat-containing protein 91	3.94239	4.12695	4.84053	3.21701	3.48846	3.15651	1.30905	0.388524	0.120525	1	up	no
LOC105389792	LOC105389792	XM_011560972.1	GO:0006810(transport);GO:0006869(lipid transport)	NA	NA	NA	oxysterol-binding protein-related protein 3-like	0.154082	0.31987	0.557728	0.179392	0.231309	0.190046	1.71733	0.780166	0.120746	1	up	no
MSTRG.5658	LOC105383735	XM_011553829.1	GO:0005575(cellular_component);GO:0016042(lipid catabolic process);GO:0016298(lipase activity);GO:0052689(carboxylic ester hydrolase activity)	00561(Glycerolipid metabolism)	NA	NA	lipase member H-A-like	0.804321	0.782746	0.567347	0.898475	1.0755	1.56752	0.608335	-0.717061	0.120758	1	down	no
MSTRG.4744	LOC105382606	XM_011552519.1	GO:0000070(mitotic sister chromatid segregation);GO:0000775(chromosome, centromeric region);GO:0000785(chromatin);GO:0000793(condensed chromosome);GO:0000796(condensin complex);GO:0002009(morphogenesis of an epithelium);GO:0003682(chromatin binding);GO:0005515(protein binding);GO:0005634(nucleus);GO:0006099(tricarboxylic acid cycle);GO:0007052(mitotic spindle organization);GO:0007067(mitotic nucl…	03040(Spliceosome)	NA	NA	condensin complex subunit 2-like	3.47418	2.39237	2.75129	1.95304	2.79001	1.81622	1.31384	0.393788	0.120928	1	up	no
MSTRG.6272	LOC105384463	XM_011554708.1;XM_011554709.1	GO:0030170(pyridoxal phosphate binding);GO:0042802(identical protein binding);GO:0042802(identical protein binding)	00564(Glycerophospholipid metabolism);00564(Glycerophospholipid metabolism)	K14286	EC:4.2.3.2	alanine--glyoxylate aminotransferase 2-like%2C transcript variant X2	12.4984	13.7431	14.5695	20.4613	16.7189	17.4593	0.746913	-0.420988	0.120964	1	down	no
LOC105393501	LOC105393501	XM_011565274.1	GO:0000981(RNA polymerase II transcription factor activity, sequence-specific DNA binding);GO:0005634(nucleus)	04068(FoxO signaling pathway)	K09385	NA	fork head domain transcription factor slp2-like	1.17053	2.15233	1.2739	0.495659	1.466	0.830312	1.64642	0.719333	0.121102	1	up	no
MSTRG.12664		MSTRG.12664.1	NA	NA	NA	NA		2.48904	8.53873	5.90897	6.01267	7.84012	13.3955	0.621572	-0.686007	0.121117	1	down	no
MSTRG.7016	LOC105385428	XM_011555811.1;MSTRG.7016.1	GO:0003677(DNA binding);GO:0003707(steroid hormone receptor activity);GO:0004879(RNA polymerase II transcription factor activity, ligand-activated sequence-specific DNA binding);GO:0005634(nucleus);GO:0006351(transcription, DNA-templated);GO:0006355(regulation of transcription, DNA-templated);GO:0030522(intracellular receptor signaling pathway);GO:0043401(steroid hormone mediated signaling pathwa…	04512(ECM-receptor interaction)	NA	NA	COUP transcription factor 2-like	12.1009	13.0329	12.5058	19.8261	15.0429	16.1891	0.737194	-0.439884	0.121179	1	down	no
MSTRG.7677	LOC105386160	XM_011556664.1;XM_011556665.1	GO:0005929(cilium);GO:0030991(intraciliary transport particle A);GO:0035091(phosphatidylinositol binding);GO:0035721(intraciliary retrograde transport);GO:0042384(cilium assembly);GO:0061512(protein localization to cilium);GO:0061512(protein localization to cilium)	NA	NA	NA	WD repeat-containing protein 35%2C transcript variant X2	0.184257	0.389006	0.248556	0.382684	0.696521	0.395701	0.557201	-0.84373	0.12124	1	down	no
MSTRG.6546		MSTRG.6546.1	NA	NA	NA	NA		7.36052	7.25419	5.40237	9.12879	11.2917	8.60613	0.689611	-0.536145	0.121515	1	down	no
MSTRG.15715	LOC105396930	XM_011568942.1	GO:0003674(molecular_function);GO:0005575(cellular_component);GO:0008150(biological_process)	NA	NA	NA	armadillo repeat-containing protein 6 homolog	2.21811	2.13056	1.82977	1.15462	1.85181	1.53375	1.36084	0.444492	0.12181	1	up	no
LOC105390190	LOC105390190	XM_011561448.1;XM_011561449.1	GO:0004357(glutamate-cysteine ligase activity);GO:0017109(glutamate-cysteine ligase complex);GO:0017109(glutamate-cysteine ligase complex)	04141(Protein processing in endoplasmic reticulum);04141(Protein processing in endoplasmic reticulum)	K14020	NA	wolframin-like%2C transcript variant X1	1.90173	1.52246	2.00699	1.25161	1.454	1.44085	1.30984	0.389387	0.121906	1	up	no
MSTRG.585		MSTRG.585.1	NA	NA	NA	NA		2.89392	4.12377	2.62909	2.00831	1.54134	2.64132	1.5582	0.639884	0.121985	1	up	no
MSTRG.2572	LOC105380001	XM_011549478.1	GO:0005737(cytoplasm);GO:0005886(plasma membrane);GO:0006508(proteolysis);GO:0008270(zinc ion binding);GO:0042277(peptide binding);GO:0043171(peptide catabolic process);GO:0070006(metalloaminopeptidase activity)	00480(Glutathione metabolism)	K11140	EC:3.4.11.2	aminopeptidase N-like	7.36444	9.80373	7.43363	6.04175	7.52823	5.83832	1.26759	0.342091	0.122121	1	up	no
MSTRG.12260	LOC105391903	MSTRG.12260.1	NA	NA	NA	NA		95.0956	67.8985	45.059	44.5089	66.3489	48.5625	1.30506	0.384116	0.122134	1	up	no
MSTRG.2994	LOC105380478	XM_011550045.1;MSTRG.2994.2	GO:0005215(transporter activity);GO:0005622(intracellular);GO:0006810(transport);GO:0008431(vitamin E binding)	NA	NA	NA	alpha-tocopherol transfer protein-like	194.455	124.678	149.104	132.33	155.297	80.0148	1.27363	0.348942	0.122442	1	up	no
MSTRG.14002	LOC105393994	XM_011565828.1	GO:0004674(protein serine/threonine kinase activity);GO:0005634(nucleus);GO:0005737(cytoplasm);GO:0006468(protein phosphorylation);GO:0035556(intracellular signal transduction)	04922(Glucagon signaling pathway)	NA	NA	SNF-related serine/threonine-protein kinase-like	4.75925	6.86465	4.81277	7.20475	11.531	5.38828	0.68134	-0.553553	0.122516	1	down	no
MSTRG.8493		MSTRG.8493.1	NA	NA	NA	NA		7.18131	4.40295	4.0943	4.50006	2.62435	3.76046	1.4404	0.526469	0.122614	1	up	no
MSTRG.1738	LOC105397295	XR_961155.1	NA	NA	NA	NA	uncharacterized LOC105397295	15.2137	8.80491	5.65655	7.78951	5.99054	4.9831	1.58156	0.661353	0.12272	1	up	no
MSTRG.15813	LOC105397196	MSTRG.15813.1;MSTRG.15813.3	NA	NA	NA	NA		25.9606	28.3028	21.9656	40.7964	41.6146	22.356	0.727605	-0.458772	0.122848	1	down	no
LOC105389621	LOC105389621	XM_011560766.1	NA	NA	NA	NA	uncharacterized LOC105389621	2.47555	2.44733	2.1718	2.08396	1.44221	1.58988	1.38675	0.471706	0.122939	1	up	no
MSTRG.2041		MSTRG.2041.1	NA	NA	NA	NA		19.4025	20.2214	20.7781	12.7321	18.2816	15.5766	1.29645	0.374567	0.123034	1	up	no
MSTRG.5142	LOC105383027	XM_011553037.1;XM_011553038.1	NA	NA	NA	NA	eukaryotic translation initiation factor 5B-like isoform X2	8.29286	7.67611	6.26379	6.7665	4.38497	6.02262	1.29455	0.372454	0.123143	1	up	no
MSTRG.12510	LOC105392204	MSTRG.12510.1	NA	NA	NA	NA		6.64764	6.94677	5.93317	14.336	7.02625	8.33112	0.657641	-0.604628	0.123317	1	down	no
MSTRG.5178	LOC105383097	XM_011553109.1	GO:0000244(spliceosomal tri-snRNP complex assembly)	NA	NA	NA	protein AAR2 homolog	5.59126	6.00292	4.89731	4.33704	4.83346	3.16103	1.33734	0.41937	0.123336	1	up	no
LOC105394105	LOC105394105	XM_011565945.1	NA	00260(Glycine, serine and threonine metabolism);00330(Arginine and proline metabolism);00340(Histidine metabolism);00350(Tyrosine metabolism);00360(Phenylalanine metabolism);00380(Tryptophan metabolism);00982(Drug metabolism - cytochrome P450)	K00274	EC:1.4.3.4	uncharacterized LOC105394105	1.69004	1.03056	0.908141	1.09627	0.368048	0.79035	1.60943	0.686552	0.123424	1	up	no
MSTRG.15121		MSTRG.15121.1	NA	NA	NA	NA		4.36553	5.39543	4.89614	3.10254	2.33927	4.43487	1.48401	0.569502	0.123437	1	up	no
MSTRG.10429	LOC105389596	XM_011560739.1	GO:0004084(branched-chain-amino-acid transaminase activity);GO:0005737(cytoplasm);GO:0005739(mitochondrion);GO:0009082(branched-chain amino acid biosynthetic process)	01210(2-Oxocarboxylic acid metabolism);01230(Biosynthesis of amino acids);00270(Cysteine and methionine metabolism);00280(Valine, leucine and isoleucine degradation);00290(Valine, leucine and isoleucine biosynthesis);00770(Pantothenate and CoA biosynthesis)	K00826	EC:2.6.1.42	branched-chain-amino-acid aminotransferase%2C mitochondrial-like	4.03063	4.11099	4.46148	6.92328	5.6654	6.83065	0.648998	-0.623714	0.123454	1	down	no
LOC105383454	LOC105383454	XM_011553502.1	NA	NA	NA	NA	uncharacterized LOC105383454	1.04668	0.947187	1.61117	0.84537	0.33525	0.96963	1.67657	0.745511	0.123479	1	up	no
MSTRG.8444	LOC105387107	XM_011557783.1	GO:0001676(long-chain fatty acid metabolic process);GO:0004321(fatty-acyl-CoA synthase activity);GO:0004467(long-chain fatty acid-CoA ligase activity);GO:0005777(peroxisome);GO:0006637(acyl-CoA metabolic process);GO:0045289(luciferin monooxygenase activity);GO:0046949(fatty-acyl-CoA biosynthetic process)	00360(Phenylalanine metabolism);00130(Ubiquinone and other terpenoid-quinone biosynthesis)	K01904	EC:6.2.1.12	4-coumarate--CoA ligase 1-like	2.41355	2.23699	1.44846	1.47368	1.56973	1.36646	1.38303	0.467835	0.123574	1	up	no
LOC105397316	LOC105397316	XR_961156.1	NA	NA	NA	NA	uncharacterized LOC105397316	1.06604	1.67319	0.606037	1.4552	2.61524	2.00247	0.550851	-0.860266	0.123597	1	down	no
MSTRG.15593	LOC105396541	XM_011568537.1	GO:0016020(membrane);GO:0030001(metal ion transport);GO:0046873(metal ion transmembrane transporter activity);GO:0055085(transmembrane transport)	00073(Cutin, suberine and wax);04146(Peroxisome)	NA	NA	zinc transporter ZIP9	2.98567	3.59849	3.1071	6.01752	5.07834	3.07963	0.683662	-0.548645	0.123752	1	down	no
LOC105398618	LOC105398618	XM_011570762.1	GO:0003674(molecular_function);GO:0005575(cellular_component);GO:0008150(biological_process)	NA	NA	NA	testis-expressed sequence 9 protein-like	1.67961	1.76276	1.41751	1.22655	1.25276	0.727462	1.51551	0.5998	0.12378	1	up	no
MSTRG.3196	LOC105380715	XM_011550307.1;MSTRG.3196.1	GO:0003674(molecular_function);GO:0005575(cellular_component);GO:0008150(biological_process)	NA	NA	NA	UPF0605 protein CG18335-like	14.4868	10.0795	10.8886	10.2863	8.22192	8.80475	1.2981	0.376401	0.124037	1	up	no
MSTRG.11500		MSTRG.11500.1	NA	NA	NA	NA		3.67133	1.96806	2.21511	2.91023	6.39664	4.09609	0.586028	-0.770958	0.124054	1	down	no
MSTRG.10052	LOC105389100	MSTRG.10052.1	NA	NA	NA	NA		4.91751	3.36597	3.1168	3.35302	2.65439	2.57132	1.3289	0.410233	0.124286	1	up	no
LOC105395124	LOC105395124	XM_011567054.1	GO:0005096(GTPase activator activity);GO:0016020(membrane);GO:0043547(positive regulation of GTPase activity)	05200(Pathways in cancer);05220(Chronic myeloid leukemia)	NA	NA	breakpoint cluster region protein-like	0.458085	0.987862	0.547005	1.0946	1.26281	0.849598	0.621436	-0.686322	0.124463	1	down	no
MSTRG.6308	LOC105384513	XM_011554768.1	GO:0000209(protein polyubiquitination);GO:0000838(Hrd1p ubiquitin ligase ERAD-M complex);GO:0030433(ER-associated ubiquitin-dependent protein catabolic process);GO:0030968(endoplasmic reticulum unfolded protein response);GO:0042787(protein ubiquitination involved in ubiquitin-dependent protein catabolic process);GO:1990381(ubiquitin-specific protease binding)	03010(Ribosome)	NA	NA	uncharacterized LOC105384513	5.82588	4.063	5.9496	4.74838	3.79066	3.61349	1.30331	0.382178	0.124558	1	up	no
LOC105388821	LOC105388821	XM_011559824.1	NA	NA	NA	NA	uncharacterized LOC105388821	3.59673	1.93168	1.69087	1.73339	1.00321	1.71576	1.62145	0.697285	0.124872	1	up	no
MSTRG.16003	LOC105397541	XM_011569566.1	GO:0016491(oxidoreductase activity);GO:0055114(oxidation-reduction process)	00830(Retinol metabolism)	K15734	EC:1.1.1.105	17-beta-hydroxysteroid dehydrogenase 13-like	2.83463	5.82109	4.47924	7.74244	4.83538	6.9128	0.673912	-0.569368	0.124901	1	down	no
MSTRG.3879	LOC105381564	XM_011551322.1	GO:0002009(morphogenesis of an epithelium);GO:0004672(protein kinase activity);GO:0004674(protein serine/threonine kinase activity);GO:0005524(ATP binding);GO:0005575(cellular_component);GO:0006468(protein phosphorylation);GO:0007155(cell adhesion);GO:0007476(imaginal disc-derived wing morphogenesis);GO:0007480(imaginal disc-derived leg morphogenesis);GO:0008360(regulation of cell shape);GO:00400…	05200(Pathways in cancer);05219(Bladder cancer)	NA	NA	death-associated protein kinase related-like	4.87507	5.39573	5.92759	8.25613	6.72286	7.39743	0.723904	-0.466129	0.12508	1	down	no
LOC105397469	LOC105397469	XM_011569494.1	GO:0000122(negative regulation of transcription from RNA polymerase II promoter);GO:0005634(nucleus)	NA	K20225	NA	putative transcription factor capicua	0.084156	0.339623	0.494321	0.609058	0.683088	0.500766	0.512072	-0.965581	0.125292	1	down	no
MSTRG.2811	LOC105380290	XM_011549812.1	NA	NA	NA	NA	nucleolar and coiled-body phosphoprotein 1-like	0.558039	1.20039	0.792315	1.05406	1.65675	1.47996	0.608657	-0.716298	0.125475	1	down	no
MSTRG.6287	LOC105384472	XM_011554724.1	NA	NA	NA	NA	uncharacterized LOC105384472	16.3365	11.6271	11.2458	13.098	5.20744	9.26737	1.42203	0.507954	0.125487	1	up	no
MSTRG.5409		MSTRG.5409.1	NA	NA	NA	NA		1.48576	2.70785	4.75213	4.24167	6.01372	4.47591	0.607261	-0.719612	0.125501	1	down	no
MSTRG.13762	LOC105393727	MSTRG.13762.1	NA	NA	NA	NA		4.57539	4.65493	6.15584	7.44288	7.9606	5.58974	0.732911	-0.448291	0.125517	1	down	no
LOC105393127	LOC105393127	XM_011564859.1	GO:0000902(cell morphogenesis);GO:0004871(signal transducer activity);GO:0005515(protein binding);GO:0006909(phagocytosis);GO:0007030(Golgi organization);GO:0007155(cell adhesion);GO:0007528(neuromuscular junction development);GO:0008360(regulation of cell shape);GO:0016203(muscle attachment);GO:0021955(central nervous system neuron axonogenesis);GO:0022416(chaeta development);GO:0030031(cell pro…	04810(Regulation of actin cytoskeleton)	K05751	NA	abl interactor 1-like	0.538896	1.19461	1.02462	1.25874	2.07233	1.62534	0.556477	-0.845607	0.125526	1	down	no
MSTRG.12082	LOC105391679	XM_011563201.1;XM_011563203.1	NA	NA	NA	NA	uncharacterized LOC105391679%2C transcript variant X3	1.45485	1.17307	0.758021	1.04133	0.587639	0.716061	1.44388	0.529952	0.125569	1	up	no
LOC105381441	LOC105381441	XM_011551165.1	GO:0000139(Golgi membrane);GO:0006888(ER to Golgi vesicle-mediated transport);GO:0012507(ER to Golgi transport vesicle membrane);GO:0035493(SNARE complex assembly);GO:0048211(Golgi vesicle docking)	03440(Homologous recombination);03450(Non-homologous end-joining)	NA	NA	structural maintenance of chromosomes protein 2-like	3.79115	2.50915	1.9528	2.05567	1.9112	2.05214	1.37117	0.45541	0.12558	1	up	no
MSTRG.58	LOC105392429	MSTRG.58.1	NA	NA	NA	NA		15.2521	11.9542	12.7554	7.88013	9.91218	11.23	1.37694	0.461461	0.125925	1	up	no
LOC105390839	LOC105390839	XM_011562205.1	GO:0005654(nucleoplasm);GO:0005794(Golgi apparatus);GO:0006888(ER to Golgi vesicle-mediated transport);GO:0016021(integral component of membrane);GO:0016787(hydrolase activity)	NA	NA	NA	metallophosphoesterase 1-like	1.54207	2.66601	3.16727	1.40586	1.80293	1.54551	1.5513	0.633479	0.125926	1	up	no
LOC105398235	LOC105398235	XM_011570296.1	GO:0000278(mitotic cell cycle);GO:0004725(protein tyrosine phosphatase activity);GO:0005575(cellular_component);GO:0006470(protein dephosphorylation);GO:0008138(protein tyrosine/serine/threonine phosphatase activity);GO:0016311(dephosphorylation);GO:0046872(metal ion binding)	00562(Inositol phosphate metabolism);04070(Phosphatidylinositol signaling system)	K18083	EC:3.1.3.64;EC:3.1.3.95	myotubularin-related protein 8-like	0.571481	0.483161	0.342109	0.509264	1.1354	0.788994	0.573932	-0.801049	0.126033	1	down	no
MSTRG.14562	LOC105394767	XM_011566679.1	NA	NA	NA	NA	uncharacterized LOC105394767	3.94778	3.3476	3.5855	3.00266	2.6969	2.7129	1.29342	0.371194	0.126069	1	up	no
MSTRG.12419	LOC105392105	MSTRG.12419.1;MSTRG.12419.2;XM_011563698.1	GO:0004674(protein serine/threonine kinase activity);GO:0005634(nucleus);GO:0005737(cytoplasm);GO:0035556(intracellular signal transduction)	04144(Endocytosis)	NA	NA	putative serine/threonine-protein kinase F31E3.2	9.21328	10.8945	11.9894	14.5451	17.4772	11.5618	0.736443	-0.441353	0.126083	1	down	no
MSTRG.639	LOC105384162	XM_011554357.1;MSTRG.639.2	GO:0005506(iron ion binding);GO:0005737(cytoplasm);GO:0019310(inositol catabolic process);GO:0050113(inositol oxygenase activity);GO:0055114(oxidation-reduction process)	00053(Ascorbate and aldarate metabolism);00562(Inositol phosphate metabolism)	K00469	EC:1.13.99.1	inositol oxygenase-like	4.53989	4.36544	4.70052	4.17305	3.05434	3.05832	1.32279	0.403587	0.126111	1	up	no
LOC105387169	LOC105387169	XM_011557857.1	GO:0000166(nucleotide binding);GO:0004672(protein kinase activity);GO:0004674(protein serine/threonine kinase activity);GO:0005524(ATP binding);GO:0006468(protein phosphorylation);GO:0016301(kinase activity);GO:0016310(phosphorylation);GO:0016740(transferase activity);GO:0035556(intracellular signal transduction);GO:0046872(metal ion binding)	04350(TGF-beta signaling pathway);04810(Regulation of actin cytoskeleton);04510(Focal adhesion);04270(Vascular smooth muscle contraction);05132(Salmonella infection)	NA	NA	serine/threonine-protein kinase MRCK beta-like	0.236095	0.464233	0.594584	0.65109	0.739071	0.761578	0.601798	-0.732649	0.126281	1	down	no
MSTRG.5361	LOC105383350	XM_011553386.1	GO:0005515(protein binding);GO:0005575(cellular_component);GO:0016322(neuron remodeling);GO:0043277(apoptotic cell clearance)	04144(Endocytosis)	NA	NA	PTB domain-containing adapter protein ced-6-like	13.3597	15.8354	14.2936	19.4464	22.5857	16.54	0.742482	-0.429573	0.126346	1	down	no
LOC105398845	LOC105398845	XM_011571085.1	GO:0005930(axoneme);GO:0045502(dynein binding)	NA	NA	NA	uncharacterized LOC105398845	1.30049	1.12547	0.924585	0.998205	0.983533	0.510735	1.34427	0.426821	0.126432	1	up	no
MSTRG.13116	LOC105392951	XM_011564642.1	GO:0005506(iron ion binding);GO:0005739(mitochondrion);GO:0007490(tergite morphogenesis);GO:0009055(electron carrier activity);GO:0016705(oxidoreductase activity, acting on paired donors, with incorporation or reduction of molecular oxygen);GO:0020037(heme binding);GO:0055114(oxidation-reduction process)	00981(Insect hormone biosynthesis)	NA	NA	1%2C25-dihydroxyvitamin D(3) 24-hydroxylase%2C mitochondrial-like	4.08926	2.91839	4.97202	3.94589	2.5723	2.33036	1.35386	0.437075	0.126481	1	up	no
MSTRG.2529	LOC105398811	XM_011571033.1	NA	NA	NA	NA	DNA topoisomerase 1-like	23.3811	18.0734	14.7236	16.5785	11.5472	14.3824	1.32158	0.402268	0.126493	1	up	no
MSTRG.9519	LOC105388409	XM_011559311.1	GO:0005737(cytoplasm);GO:0008270(zinc ion binding)	NA	NA	NA	E3 ubiquitin-protein ligase RNF123-like	2.68244	1.92192	1.66703	1.61646	0.581731	1.48426	1.70305	0.768119	0.126494	1	up	no
MSTRG.12988	LOC105392785	XM_011564462.1	GO:0004185(serine-type carboxypeptidase activity);GO:0051603(proteolysis involved in cellular protein catabolic process)	04142(Lysosome);04614(Renin-angiotensin system)	NA	NA	venom serine carboxypeptidase	33.3549	33.0002	23.8325	39.3371	63.941	26.0861	0.69716	-0.520438	0.126499	1	down	no
MSTRG.14939	LOC105395345	XM_011567298.1	GO:0001666(response to hypoxia);GO:0005524(ATP binding);GO:0006855(drug transmembrane transport);GO:0006979(response to oxidative stress);GO:0008340(determination of adult lifespan);GO:0008514(organic anion transmembrane transporter activity);GO:0034059(response to anoxia);GO:0042626(ATPase activity, coupled to transmembrane movement of substances);GO:0043190(ATP-binding cassette (ABC) transporte…	02010(ABC transporters)	K05673	NA	probable multidrug resistance-associated protein lethal(2)03659	5.11523	4.86158	5.30462	7.18799	7.25169	6.68054	0.723544	-0.466846	0.126518	1	down	no
MSTRG.1763		MSTRG.1763.1	NA	NA	NA	NA		2.01859	1.85255	1.48954	2.76223	1.60553	3.57173	0.675191	-0.566632	0.126682	1	down	no
LOC105394249	LOC105394249	XM_011566131.1	GO:0005096(GTPase activator activity);GO:0043547(positive regulation of GTPase activity);GO:0051645(Golgi localization)	04510(Focal adhesion)	NA	NA	rho GTPase-activating protein 21-like	2.19722	3.18781	3.31597	3.58039	5.83643	3.36203	0.680891	-0.554504	0.126846	1	down	no
MSTRG.10558	LOC105389806	XM_011560993.1	NA	NA	NA	NA	protein amnionless	1.83856	3.26684	2.6842	4.05559	3.95863	3.18773	0.695379	-0.524129	0.126886	1	down	no
MSTRG.8544		MSTRG.8544.1	NA	NA	NA	NA		4.02321	3.64768	2.89259	2.88957	1.85665	2.66732	1.42489	0.510853	0.1269	1	up	no
MSTRG.8980		MSTRG.8980.1	NA	NA	NA	NA		3.78549	4.17764	5.06089	3.46764	1.21357	3.43721	1.60425	0.681903	0.127139	1	up	no
MSTRG.7179	LOC105385596	XM_011556001.1	GO:0005622(intracellular);GO:1990126(retrograde transport, endosome to plasma membrane)	04144(Endocytosis)	NA	NA	uncharacterized LOC105385596	0.295415	0.283727	0.266783	0.406826	0.420486	0.427434	0.67418	-0.568794	0.127204	1	down	no
MSTRG.11019	LOC105390378	XM_011561670.1	GO:0000166(nucleotide binding);GO:0003676(nucleic acid binding)	03040(Spliceosome)	NA	NA	uncharacterized LOC105390378	17.651	14.1899	14.2001	12.6677	12.6422	10.8197	1.27433	0.349736	0.127233	1	up	no
MSTRG.1455	LOC105394641	XM_011566551.1	GO:0005576(extracellular region);GO:0006030(chitin metabolic process);GO:0008061(chitin binding);GO:0016490(structural constituent of peritrophic membrane)	00520(Amino sugar and nucleotide sugar metabolism)	NA	NA	endochitinase-like	39.623	56.5247	69.5469	105.28	90.1135	46.3305	0.685469	-0.544836	0.127278	1	down	no
LOC105387300	LOC105387300	XM_011558006.1	GO:0000132(establishment of mitotic spindle orientation);GO:0003677(DNA binding);GO:0005515(protein binding);GO:0005813(centrosome);GO:0005819(spindle);GO:0005875(microtubule associated complex);GO:0005938(cell cortex);GO:0007058(spindle assembly involved in female meiosis II);GO:0016319(mushroom body development);GO:0034454(microtubule anchoring at centrosome);GO:0040040(thermosensory behavior);…	NA	NA	NA	uncharacterized LOC105387300	3.44651	2.21435	2.64071	2.13359	2.10144	1.35865	1.4841	0.569589	0.127357	1	up	no
MSTRG.11699	LOC105391260	XM_011562723.1	GO:0004672(protein kinase activity);GO:0004674(protein serine/threonine kinase activity);GO:0005515(protein binding);GO:0005524(ATP binding);GO:0005634(nucleus);GO:0005635(nuclear envelope);GO:0005737(cytoplasm);GO:0006468(protein phosphorylation);GO:0007067(mitotic nuclear division);GO:0007088(regulation of mitotic nuclear division);GO:0007143(female meiotic division);GO:0007144(female meiosis I…	NA	NA	NA	serine/threonine-protein kinase greatwall-like	3.33535	2.48642	2.46635	1.80017	2.38041	2.10654	1.31827	0.398647	0.12765	1	up	no
LOC105381169	LOC105381169	XM_011550840.1	GO:0006821(chloride transport);GO:0016021(integral component of membrane);GO:0016933(extracellular-glycine-gated ion channel activity);GO:0019182(histamine-gated chloride channel activity);GO:0019183(histamine-gated chloride channel complex);GO:0043052(thermotaxis)	04080(Neuroactive ligand-receptor interaction)	NA	NA	glycine receptor subunit alpha-4	0.658284	0.592736	0.605105	1.17746	0.728492	1.12242	0.612912	-0.706248	0.127732	1	down	no
MSTRG.10574	LOC105389832	MSTRG.10574.1	NA	NA	NA	NA		6.59097	5.94189	5.66024	4.87024	3.81864	4.98114	1.33088	0.412377	0.127746	1	up	no
MSTRG.6476	LOC105384751	XM_011555029.1	GO:0000293(ferric-chelate reductase activity);GO:0016021(integral component of membrane);GO:0055114(oxidation-reduction process)	03018(RNA degradation)	K12589	NA	putative ferric-chelate reductase 1 homolog	0.866732	0.892011	1.0602	1.64241	1.47796	1.13216	0.662886	-0.593167	0.127829	1	down	no
MSTRG.3134	LOC105380630	XM_011550222.1;XR_960438.1	NA	03022(Basal transcription factors);03420(Nucleotide excision repair);03420(Nucleotide excision repair)	K10848	EC:3.1.-.-	uncharacterized LOC105380630%2C transcript variant X2	4.08368	5.14869	6.84417	5.72997	9.83929	7.58444	0.69434	-0.526286	0.127912	1	down	no
MSTRG.11421	LOC105390901	MSTRG.11421.1	NA	NA	NA	NA		19.1546	10.683	13.8867	9.4402	10.2	11.8704	1.3876	0.472596	0.12792	1	up	no
MSTRG.15138	LOC105395643	XM_011567598.1	GO:0005342(organic acid transmembrane transporter activity);GO:0005887(integral component of plasma membrane)	04976(Bile secretion)	NA	NA	ileal sodium/bile acid cotransporter-like	5.71964	10.3997	3.92998	12.0308	10.0567	8.90282	0.646953	-0.628267	0.127925	1	down	no
MSTRG.1369	LOC105393001	XM_011564696.1	NA	NA	NA	NA	uncharacterized LOC105393001	8.22138	6.47634	7.03719	4.92926	4.60684	6.32928	1.36996	0.454132	0.127948	1	up	no
MSTRG.13947	LOC105393929	XM_011565756.1	GO:0015485(cholesterol binding);GO:0017127(cholesterol transporter activity)	NA	NA	NA	MLN64 N-terminal domain homolog	0.322133	1.16299	0.906289	1.05242	1.73804	1.53986	0.552249	-0.856609	0.127964	1	down	no
MSTRG.3083	LOC105380610	MSTRG.3083.1;XM_011550199.1;MSTRG.3083.3;MSTRG.3083.2	NA	NA	NA	NA	protein anoxia up-regulated-like	88.1893	80.2788	66.5837	66.9736	72.9008	52.5413	1.22158	0.288753	0.12803	1	up	no
MSTRG.4278	LOC105382027	XM_011551844.1;MSTRG.4278.2	GO:0004568(chitinase activity);GO:0005576(extracellular region);GO:0005975(carbohydrate metabolic process);GO:0006036(cuticle chitin catabolic process);GO:0008061(chitin binding)	00520(Amino sugar and nucleotide sugar metabolism)	K01183	EC:3.2.1.14	probable chitinase 3	12.1461	18.6942	10.1203	4.50554	17.8167	5.85384	1.45374	0.539766	0.128092	1	up	no
MSTRG.13835	LOC105393819	XM_011565630.1	GO:0016021(integral component of membrane);GO:0022857(transmembrane transporter activity);GO:0055085(transmembrane transport)	04931(Insulin resistance)	NA	NA	facilitated trehalose transporter Tret1-like	2.704	2.86619	1.61399	0.971844	2.92782	0.939921	1.48446	0.569939	0.12836	1	up	no
LOC105397964	LOC105397964	XM_011569994.1	NA	NA	NA	NA	uncharacterized LOC105397964	2.15216	0.952744	0.62492	1.07203	0.435955	0.697968	1.6908	0.757707	0.128438	1	up	no
LOC105381501	LOC105381501	XM_011551234.1;XM_011551236.1;XM_011551233.1	GO:0005544(calcium-dependent phospholipid binding);GO:0005764(lysosome);GO:0006887(exocytosis);GO:0007269(neurotransmitter secretion);GO:0008021(synaptic vesicle);GO:0016020(membrane);GO:0016021(integral component of membrane);GO:0016079(synaptic vesicle exocytosis);GO:0016192(vesicle-mediated transport);GO:0016528(sarcoplasm);GO:0031982(vesicle);GO:0031982(vesicle)	04721(Synaptic vesicle cycle);04721(Synaptic vesicle cycle)	NA	NA	synaptotagmin-7%2C transcript variant X3	0.600434	0.891102	0.538256	1.25726	1.08173	1.00724	0.606591	-0.721203	0.128527	1	down	no
MSTRG.7039	LOC105385420	XM_011555798.1	NA	NA	NA	NA	uncharacterized LOC105385420	5.05878	4.56546	3.70932	4.18204	1.98724	3.44618	1.38668	0.471635	0.128527	1	up	no
MSTRG.9529	LOC105388440	XM_011559340.1	GO:0005214(structural constituent of chitin-based cuticle);GO:0008010(structural constituent of chitin-based larval cuticle);GO:0031012(extracellular matrix);GO:0040003(chitin-based cuticle development)	00230(Purine metabolism);00240(Pyrimidine metabolism);03020(RNA polymerase)	K03006	EC:2.7.7.6	uncharacterized LOC105388440	15.8788	21.2167	28.4033	48.6189	18.9828	31.0039	0.66425	-0.590201	0.128575	1	down	no
MSTRG.2509		MSTRG.2509.1	NA	NA	NA	NA		6.65519	4.45886	3.79785	2.49667	2.2978	4.60424	1.58659	0.665928	0.128605	1	up	no
LOC105382946	LOC105382946	XM_011552940.1	NA	NA	NA	NA	uncharacterized LOC105382946	1.28464	0.918129	0.983771	1.50851	2.21675	1.32706	0.630709	-0.664953	0.1287	1	down	no
LOC105398302	LOC105398302	XM_011570376.1	GO:0005096(GTPase activator activity);GO:0005575(cellular_component);GO:0007165(signal transduction);GO:0007266(Rho protein signal transduction);GO:0031290(retinal ganglion cell axon guidance)	04630(Jak-STAT signaling pathway);04068(FoxO signaling pathway);04070(Phosphatidylinositol signaling system);04150(mTOR signaling pathway);04931(Insulin resistance);04933(AGE-RAGE signaling pathway in diabetic complications)	NA	NA	GTPase-activating protein CdGAPr-like	0.236586	0.495178	0.261232	0.35874	0.94241	0.470464	0.560504	-0.835204	0.128763	1	down	no
MSTRG.3564		MSTRG.3564.1	NA	NA	NA	NA		23.1922	22.4512	18.3738	26.4611	34.1532	27.6744	0.725089	-0.46377	0.128883	1	down	no
MSTRG.2636	LOC105380091	XM_011549588.1;MSTRG.2636.2	GO:0004181(metallocarboxypeptidase activity);GO:0005615(extracellular space)	04972(Pancreatic secretion);04974(Protein digestion and absorption)	NA	NA	uncharacterized LOC105380091	7.92202	5.32745	6.01394	5.64025	4.02861	5.13039	1.30165	0.38034	0.128897	1	up	no
MSTRG.15210	LOC105395720	MSTRG.15210.1	NA	NA	NA	NA		7.87067	3.70918	4.67633	4.68539	3.67499	2.76008	1.46183	0.547772	0.129152	1	up	no
MSTRG.2993	LOC105380476	XM_011550044.1	GO:0005215(transporter activity);GO:0005622(intracellular);GO:0006810(transport);GO:0008431(vitamin E binding)	NA	NA	NA	alpha-tocopherol transfer protein-like	23.577	25.9891	54.0451	66.6385	43.8499	42.2235	0.678475	-0.559633	0.1292	1	down	no
MSTRG.1760		MSTRG.1760.1	NA	NA	NA	NA		12.4534	9.9134	10.9523	9.29278	8.17046	8.63493	1.27668	0.352398	0.129252	1	up	no
MSTRG.8768	LOC105387479	MSTRG.8768.1	NA	NA	NA	NA		15.0224	10.5195	7.81083	8.79346	7.17888	9.14555	1.32785	0.40909	0.129291	1	up	no
LOC105391088	LOC105391088	XM_011562496.1	GO:0007517(muscle organ development);GO:0035332(positive regulation of hippo signaling);GO:0045927(positive regulation of growth)	NA	NA	NA	DDB1- and CUL4-associated factor 7	1.29284	1.55341	1.31705	1.84714	2.44729	1.7184	0.692402	-0.530317	0.129363	1	down	no
LOC105398531	LOC105398531	XM_011570653.1	NA	NA	NA	NA	uncharacterized LOC105398531	0.636602	0.324303	0.662669	0.423499	1.07	1.63263	0.519356	-0.945204	0.129431	1	down	no
MSTRG.14259	LOC105394327	MSTRG.14259.1	NA	NA	NA	NA		5.94448	6.93872	6.19752	8.55821	8.89203	7.77827	0.756316	-0.402939	0.129492	1	down	no
MSTRG.13292	LOC105393180	XM_011564914.1	GO:0004501(ecdysone 20-monooxygenase activity);GO:0005506(iron ion binding);GO:0005739(mitochondrion);GO:0007295(growth of a germarium-derived egg chamber);GO:0007298(border follicle cell migration);GO:0007391(dorsal closure);GO:0007417(central nervous system development);GO:0007494(midgut development);GO:0008258(head involution);GO:0009055(electron carrier activity);GO:0016020(membrane);GO:00200…	00981(Insect hormone biosynthesis)	K10723	EC:1.14.99.22	ecdysone 20-monooxygenase	3.59634	3.58249	2.52602	2.24243	3.13912	2.12659	1.29258	0.370248	0.129493	1	up	no
MSTRG.3464	LOC105381034	XM_011550674.1	NA	NA	NA	NA	uncharacterized LOC105381034	4.92636	4.73639	2.37726	3.18041	1.53883	3.15215	1.52959	0.613147	0.129568	1	up	no
MSTRG.14861	LOC105395174	XM_011567112.1	GO:0003774(motor activity);GO:0003777(microtubule motor activity);GO:0005524(ATP binding);GO:0005858(axonemal dynein complex);GO:0005875(microtubule associated complex);GO:0007018(microtubule-based movement);GO:0008017(microtubule binding);GO:0016887(ATPase activity);GO:0042623(ATPase activity, coupled)	05016(Huntington's disease)	NA	NA	dynein beta chain%2C ciliary-like	2.49412	2.06517	1.67894	1.73538	0.71371	1.73117	1.49231	0.577543	0.129744	1	up	no
MSTRG.15738		MSTRG.15738.1	NA	NA	NA	NA		5.11867	1.9367	3.31123	10.5278	3.95996	3.56066	0.574377	-0.799931	0.129812	1	down	no
MSTRG.15732	LOC105396961	XM_011568971.1	GO:0004344(glucose dehydrogenase activity);GO:0005576(extracellular region);GO:0006006(glucose metabolic process);GO:0008364(pupal chitin-based cuticle development);GO:0016614(oxidoreductase activity, acting on CH-OH group of donors);GO:0019233(sensory perception of pain);GO:0042335(cuticle development);GO:0046693(sperm storage);GO:0050660(flavin adenine dinucleotide binding);GO:0055114(oxidation…	00260(Glycine, serine and threonine metabolism)	K00115	EC:1.1.5.9	glucose dehydrogenase [FAD%2C quinone]-like	2.60656	4.57004	2.79808	0.953331	3.85392	1.88707	1.49002	0.575333	0.12985	1	up	no
MSTRG.7264	LOC105385676	XM_011556095.1	GO:0005576(extracellular region);GO:0006030(chitin metabolic process);GO:0008061(chitin binding)	NA	NA	NA	uncharacterized LOC105385676	2.09113	4.39727	5.23352	6.98936	4.04397	6.67484	0.66195	-0.595206	0.129974	1	down	no
MSTRG.15004		MSTRG.15004.1	NA	NA	NA	NA		3.43506	4.03128	4.17644	5.88165	5.88346	5.61674	0.669823	-0.578147	0.129986	1	down	no
LOC105386177	LOC105386177	XM_011556684.1	NA	04214(Apoptosis - fly);04215(Apoptosis - multiple species)	K20017	NA	uncharacterized LOC105386177	1.03882	0.975154	2.27078	2.04493	1.6056	3.20821	0.624715	-0.67873	0.130149	1	down	no
MSTRG.8998	LOC105387766;LOC105387765	XM_011558546.1;XM_011558547.1;XM_011558545.1;MSTRG.8998.3;MSTRG.8998.1	NA	NA	NA	NA	uncharacterized LOC105387766%2C transcript variant X1;uncharacterized LOC105387765	18.4244	12.6334	10.1299	11.8803	8.43156	11.1502	1.30912	0.3886	0.130179	1	up	no
LOC105390238	LOC105390238	XM_011561513.1;XM_011561512.1	GO:0005215(transporter activity);GO:0005524(ATP binding);GO:0006810(transport);GO:0042048(olfactory behavior);GO:0042626(ATPase activity, coupled to transmembrane movement of substances);GO:0043190(ATP-binding cassette (ABC) transporter complex);GO:0043190(ATP-binding cassette (ABC) transporter complex)	02010(ABC transporters);02010(ABC transporters)	K05679	NA	ATP-binding cassette sub-family G member 1-like%2C transcript variant X1	0.833885	1.53973	1.24414	1.81934	1.77235	1.6533	0.689753	-0.535847	0.130283	1	down	no
MSTRG.11747	LOC105391290	XR_960927.1	NA	NA	NA	NA	uncharacterized LOC105391290	1489.5	1012.56	951.776	967.031	740.359	1003.99	1.27383	0.349173	0.130354	1	up	no
MSTRG.6039	LOC105384189	XM_011554383.1	GO:0003779(actin binding);GO:0031032(actomyosin structure organization)	04141(Protein processing in endoplasmic reticulum);04214(Apoptosis - fly)	NA	NA	muscle-specific protein 20	175.541	132.496	119.459	110.283	131.832	105.043	1.23142	0.300322	0.13051	1	up	no
MSTRG.5285	LOC105383249	MSTRG.5285.1	NA	NA	NA	NA		25.3684	18.9572	15.1611	11.5888	20.5687	12.5881	1.32944	0.410823	0.130705	1	up	no
MSTRG.4142	LOC105381838	XM_011551638.1;MSTRG.4142.2	GO:0001676(long-chain fatty acid metabolic process);GO:0004467(long-chain fatty acid-CoA ligase activity)	01212(Fatty acid metabolism);00061(Fatty acid biosynthesis);00071(Fatty acid degradation);04146(Peroxisome)	K01897	EC:6.2.1.3	long-chain-fatty-acid--CoA ligase 5	50.4461	50.6994	37.5453	30.2835	44.468	37.3231	1.23749	0.307413	0.130797	1	up	no
MSTRG.4544		MSTRG.4544.1	NA	NA	NA	NA		5.83091	6.34571	12.8008	17.1983	9.27952	11.6676	0.654794	-0.610887	0.130822	1	down	no
MSTRG.11294	LOC105390723	XM_011562068.1	GO:0000287(magnesium ion binding);GO:0004743(pyruvate kinase activity);GO:0005811(lipid particle);GO:0005829(cytosol);GO:0006090(pyruvate metabolic process);GO:0006096(glycolytic process);GO:0007520(myoblast fusion);GO:0007525(somatic muscle development);GO:0009744(response to sucrose);GO:0010906(regulation of glucose metabolic process);GO:0016310(phosphorylation);GO:0030955(potassium ion binding…	01200(Carbon metabolism);01230(Biosynthesis of amino acids);00010(Glycolysis / Gluconeogenesis);00620(Pyruvate metabolism);00230(Purine metabolism)	K00873	EC:2.7.1.40	pyruvate kinase-like	4.8781	4.08045	3.60446	4.36169	2.19003	2.69047	1.35931	0.442876	0.130937	1	up	no
MSTRG.4083	LOC105381778	XM_011551575.1	GO:0003674(molecular_function);GO:0005215(transporter activity);GO:0005575(cellular_component);GO:0005622(intracellular);GO:0006810(transport);GO:0030431(sleep)	NA	NA	NA	alpha-tocopherol transfer protein-like	6.45905	5.90278	7.52688	12.0406	8.8502	7.50068	0.700516	-0.513511	0.131086	1	down	no
MSTRG.13881		MSTRG.13881.1	NA	NA	NA	NA		6.14538	3.24691	4.25611	2.60963	2.41142	3.63725	1.57634	0.656576	0.131205	1	up	no
MSTRG.6793	LOC105385120	MSTRG.6793.1	NA	NA	NA	NA		7.46758	7.50759	5.22637	10.7442	12.3315	6.17851	0.690552	-0.534178	0.131361	1	down	no
MSTRG.14300	LOC105394376	XM_011566267.1;XM_011566266.1;XM_011566265.1	GO:0005094(Rho GDP-dissociation inhibitor activity);GO:0005737(cytoplasm);GO:0005737(cytoplasm)	04962(Vasopressin-regulated water reabsorption);04722(Neurotrophin signaling pathway);04722(Neurotrophin signaling pathway)	NA	NA	rho GDP-dissociation inhibitor 1-like isoform X2	15.8857	24.5044	20.8793	12.3611	25.2092	5.12293	1.43511	0.521161	0.131483	1	up	no
MSTRG.9570	LOC105388480	XM_011559398.1;XM_011559399.1	GO:0003824(catalytic activity);GO:0005737(cytoplasm);GO:0008152(metabolic process);GO:0008152(metabolic process)	NA	NA	NA	isochorismatase domain-containing protein 1-like%2C transcript variant X2	58.1385	53.8261	70.0824	52.3302	52.3081	43.2111	1.2313	0.300182	0.131972	1	up	no
MSTRG.8878	LOC105387602	XM_011558352.1	GO:0005634(nucleus);GO:0006046(N-acetylglucosamine catabolic process);GO:0008448(N-acetylglucosamine-6-phosphate deacetylase activity)	00520(Amino sugar and nucleotide sugar metabolism)	K01443	EC:3.5.1.25	putative N-acetylglucosamine-6-phosphate deacetylase	19.9086	25.5102	18.3608	32.864	36.5144	19.0792	0.721019	-0.471891	0.131999	1	down	no
LOC105380914	LOC105380914	XM_011550522.1	NA	NA	NA	NA	uncharacterized LOC105380914	1.20991	1.45474	1.43321	0.682484	1.41334	0.454596	1.60673	0.684131	0.132019	1	up	no
MSTRG.11863	LOC105391431	XM_011562899.1	NA	NA	NA	NA	ribonuclease kappa-B-like	3.21606	2.67265	4.22963	2.13749	2.09281	2.68781	1.46259	0.548521	0.132023	1	up	no
MSTRG.2587		MSTRG.2587.1	NA	NA	NA	NA		1.3235	3.86119	1.98153	6.26617	4.63575	2.30071	0.542787	-0.881542	0.132055	1	down	no
MSTRG.1109	LOC105390783	XM_011562146.1	NA	NA	NA	NA	uncharacterized abhydrolase domain-containing protein DDB_G0269086-like	3.98625	2.74251	1.82492	2.30762	1.84952	1.95425	1.39963	0.485044	0.132144	1	up	no
LOC105395060	LOC105395060	XM_011566982.1	GO:0005391(sodium:potassium-exchanging ATPase activity);GO:0005887(integral component of plasma membrane);GO:0006883(cellular sodium ion homeostasis);GO:0010107(potassium ion import);GO:0015991(ATP hydrolysis coupled proton transport);GO:0030007(cellular potassium ion homeostasis);GO:0036376(sodium ion export from cell);GO:0043231(intracellular membrane-bounded organelle)	04024(cAMP signaling pathway);04022(cGMP - PKG signaling pathway);04911(Insulin secretion);04918(Thyroid hormone synthesis);04919(Thyroid hormone signaling pathway);04260(Cardiac muscle contraction);04261(Adrenergic signaling in cardiomyocytes);04970(Salivary secretion);04971(Gastric acid secretion);04972(Pancreatic secretion);04976(Bile secretion);04973(Carbohydrate digestion and absorption);049…	NA	NA	sodium/potassium-transporting ATPase subunit alpha-2-like	0.830983	0.448929	0.717406	0.574224	0.485806	0.281192	1.48918	0.574516	0.132174	1	up	no
MSTRG.2255	LOC105398475	XM_011570587.1	NA	NA	NA	NA	homeobox protein 2-like	2.94913	2.10601	1.7514	1.91488	1.35807	1.82454	1.33527	0.417135	0.132221	1	up	no
MSTRG.1771	LOC105397901	XM_011569913.1;MSTRG.1771.5;XM_011569914.1;MSTRG.1771.6;XM_011569915.1;XM_011569912.1	GO:0004835(tubulin-tyrosine ligase activity);GO:0018094(protein polyglycylation);GO:0018094(protein polyglycylation)	04068(FoxO signaling pathway);04068(FoxO signaling pathway)	NA	NA	tubulin glycylase 3A-like%2C transcript variant X4	7.35137	4.94383	5.01627	4.8292	3.44282	4.97334	1.30698	0.38624	0.132328	1	up	no
LOC105380282	LOC105380282	XM_011549805.1	NA	NA	NA	NA	uncharacterized LOC105380282	0.633864	0.525282	0.689615	0.303046	0.2228	0.566985	1.69172	0.758488	0.132417	1	up	no
MSTRG.13946	LOC105393921	MSTRG.13946.1	NA	NA	NA	NA		18.5043	8.82104	12.0145	8.95085	9.59959	10.269	1.36504	0.448948	0.13259	1	up	no
LOC105385401	LOC105385401	XM_011555777.1	NA	NA	NA	NA	uncharacterized LOC105385401	1.60076	1.27055	1.91096	0.832385	1.4136	1.01298	1.46741	0.553277	0.13274	1	up	no
LOC105384182	LOC105384182	XM_011554374.1	NA	04391(Hippo signaling pathway -fly)	NA	NA	protocadherin-23-like	0.694482	2.21398	1.72729	1.90777	2.55089	2.69911	0.647652	-0.626709	0.133096	1	down	no
MSTRG.10477	LOC105389670	XM_011560823.1;XM_011560824.1;XM_011560825.1;XM_011560822.1	GO:0004459(L-lactate dehydrogenase activity);GO:0005737(cytoplasm);GO:0005975(carbohydrate metabolic process);GO:0006096(glycolytic process);GO:0007520(myoblast fusion);GO:0007525(somatic muscle development);GO:0019752(carboxylic acid metabolic process);GO:0055114(oxidation-reduction process);GO:0055114(oxidation-reduction process)	00010(Glycolysis / Gluconeogenesis);00620(Pyruvate metabolism);00640(Propanoate metabolism);00270(Cysteine and methionine metabolism);00270(Cysteine and methionine metabolism)	K00016	EC:1.1.1.27	L-lactate dehydrogenase%2C transcript variant X2	34.3869	29.9991	44.4317	36.3523	28.2618	21.4552	1.2643	0.338343	0.133329	1	up	no
[truncated: 20,590 more rows]
