# Supplementary material for: Volatile DMNT directly protects plants against Plutella xylostella by disrupting the peritrophic matrix barrier in insect midgut
Source: eLife. 2021 Feb 18;10:e63938. doi: 10.7554/eLife.63938 (PMC7924945; doi:10.7554/eLife.63938)
Supplement: Supplementary file 3. [file elife-63938-supp3.xlsx]

## Sheet: Sheet1
Genus	log2FC	wilcox.test.p_value	q_value	significance	regulation	mean	mean_DT	mean_Control	DMNTT_1	DMNT_2	DMNT_3	DMNT_4	DMNT_5	DMNT_6	DMNT_7	DMNT_8	CK_1	CK_2	CK_3	CK_4	CK_5	CK_6	CK_7	CK_8
g__Enterococcus	6.41	0.0016	0.2726	yes	up	14.2006	28.0721	0.3291	0.463322	7.59373	59.5367	68.9739	37.0767	36.2431	8.93742	5.75228	1.49272	0.013026	0	0.121208	0.937059	0.024869	0.044257	0
g__Helicobacter	-3.34	0.0031	0.2726	yes	down	0.0105	0.0019	0.0192	0	0	0	0	0	0	0.008236	0.007121	0.012193	0.017911	0	0.011313	0.045519	0.023406	0.018967	0.024118
g__Chloroplast_unclassified	-1.31	0.0033	0.2726	yes	down	0.9105	0.5221	1.2989	0.391093	0.644605	0.099732	0.52716	0.546467	0.332029	0.8664	0.769108	1.17223	0.903673	2.78845	0.630283	1.48171	0.814816	1.70231	0.897943
g__Pelomonas	-Inf	0.0038	0.2726	yes	down	0.0727	0	0.1454	0	0	0	0	0	0	0	0	0.012193	0.013026	0.07687	0	0	0.077532	0.009484	0.974008
g__Brevundimonas	-0.91	0.0063	0.3567	yes	down	7.5017	5.2222	9.7812	7.01149	6.66144	2.67805	2.34548	5.2666	5.13624	6.68742	5.99085	9.37957	7.58597	13.4753	2.91384	8.7396	9.41646	15.2007	11.5378
g__Bosea	-4.8	0.0078	0.3567	yes	down	0.0275	0.0019	0.0531	0	0	0	0.01528	0	0	0	0	0	0.05536	0.092244	0	0.091038	0.080458	0.031612	0.07421
g__Devosia	-1.7	0.0087	0.3567	yes	down	0.1841	0.0866	0.2815	0.149743	0.129229	0.016349	0.02292	0.04775	0.150248	0.105417	0.071214	0.04877	0.210043	0.524637	0.187469	0.238581	0.298424	0.597468	0.146565
g__TRA3-20_unclassified	-1.69	0.0205	0.5004	yes	down	0.1529	0.0723	0.2334	0.218448	0	0.037604	0	0.005306	0	0.082357	0.235005	0.336167	0.011398	0.445845	0.11636	0.188353	0.272093	0.330346	0.166973
g__Enhydrobacter	-Inf	0.0273	0.5004	yes	down	0.0141	0	0.0282	0	0	0	0	0	0	0	0	0.120184	0	0	0	0	0.019017	0.023709	0.063079
g__Mycobacterium	1.89	0.033	0.5004	yes	up	0.0484	0.0762	0.0205	0	0.16769	0.070303	0.064176	0.074277	0.035243	0.148243	0.04985	0	0.022795	0	0.045251	0.08005	0.016092	0	0
g__Phenylobacterium	-1.21	0.0352	0.5004	yes	down	0.1239	0.0746	0.1731	0.082799	0	0.068668	0.067232	0	0.057502	0.065886	0.254589	0.452867	0.105836	0.117227	0.163227	0	0.098012	0.273444	0.174394
g__Undibacterium	-2.67	0.0454	0.5004	yes	down	0.1871	0.0508	0.3234	0.033472	0.106152	0	0.01528	0.049518	0.096455	0.105417	0	0.419773	0.035821	0.144131	0.103431	0.156961	0.117029	0	1.61036
g__Actinobacteria_unclassified	1.68	0.0454	0.5004	yes	up	0.1085	0.1655	0.0515	0.267775	0.333841	0.039239	0	0.157397	0.096455	0.354137	0.074774	0	0.03745	0	0.02909	0.04081	0.016092	0.230768	0.057513
g__Acidovorax	-2.71	0.0523	0.5004	no	down	0.0469	0.0124	0.0813	0.017617	0	0.014715	0	0	0	0.009883	0.056971	0.085348	0	0.251749	0.148682	0.054936	0	0.061644	0.048237
g__Flavobacterium	1.31	0.058	0.5004	no	up	0.1891	0.2697	0.1086	0.475654	0.330764	0.047414	0.117656	0.293571	0.172507	0.192716	0.526981	0	0.213299	0	0.373321	0.183645	0.068755	0.030031	0
g__Methyloversatilis	-0.83	0.0587	0.5004	no	down	0.4536	0.3265	0.5806	0.565499	0.549222	0.273036	0.117656	0.284729	0.181781	0.184481	0.455767	0.778583	0.512896	0.616881	0.252113	0.505415	0.244298	0.886718	0.847851
g__Herbaspirillum	-1.94	0.0592	0.5004	no	down	0.0304	0.0126	0.0483	0.035234	0.009231	0	0	0	0	0.056003	0	0.010451	0.021167	0.055731	0.054948	0.009418	0.0512	0	0.18367
g__Streptococcus	-0.42	0.0624	0.5004	no	down	0.0764	0.0652	0.0875	0.068706	0.066153	0.00327	0.140576	0.003537	0.005565	0.233895	0	0	0	0.015374	0	0	0	0	0.684588
g__Vibrionimonas	-Inf	0.0645	0.5004	no	down	0.0086	0	0.0171	0	0	0	0	0	0	0	0	0.03832	0	0.094166	0	0.004709	0	0	0
g__Leifsonia	-Inf	0.0645	0.5004	no	down	0.0074	0	0.0148	0	0	0	0	0	0	0	0	0.026127	0	0	0	0	0.077532	0	0.014842
g__Deinococcus	-Inf	0.0645	0.5004	no	down	0.0064	0	0.0128	0	0	0	0	0	0	0	0	0	0.045591	0	0	0.015696	0.04096	0	0
g__Peptoniphilus	-Inf	0.0645	0.5004	no	down	0.0055	0	0.011	0	0	0	0	0	0	0	0	0.064446	0	0	0.004848	0.018835	0	0	0
g__Haemophilus	-Inf	0.0645	0.5004	no	down	0.0029	0	0.0058	0	0	0	0	0	0	0	0	0	0.003256	0	0.004848	0	0	0.037934	0
g__Micrococcus	Inf	0.0645	0.5004	no	up	0.0025	0.0049	0	0	0	0	0	0.017685	0	0.018119	0.003561	0	0	0	0	0	0	0	0
g__Muribaculaceae_unclassified	-4.31	0.0801	0.5004	no	down	0.0852	0.0082	0.1621	0	0	0	0	0	0	0	0.065873	1.25758	0	0	0.003232	0.028253	0.004389	0.003161	0
g__Alphaproteobacteria_unclassified	-3.73	0.0821	0.5004	no	down	0.0386	0.0054	0.0719	0	0.015384	0.00654	0	0	0	0.021413	0	0.282171	0	0.065339	0	0.03924	0.073143	0	0.115026
g__Thermincola	3.38	0.0826	0.5004	no	up	0.0193	0.0353	0.0034	0.088084	0.058461	0.027794	0	0.008843	0	0.098829	0	0	0	0.017296	0	0	0.01024	0	0
g__Delftia	-1.57	0.0929	0.5004	no	down	0.2215	0.1114	0.3317	0.072229	0.363071	0.089922	0.09932	0.061898	0.077906	0.019766	0.10682	0.25256	0.169337	0	0.853306	0.491289	0.144824	0.075869	0.666036
g__Alkanindiges	0.96	0.1033	0.5004	no	up	0.0239	0.0316	0.0162	0	0.016923	0.044144	0	0.129101	0.048228	0	0.014243	0	0	0	0.129289	0	0	0	0
g__SWB02	-1.24	0.1141	0.5004	no	down	0.0689	0.0409	0.0969	0	0.061538	0.026159	0	0.152091	0.057502	0.029649	0	0.006967	0.076527	0.290184	0.103431	0.067493	0.179932	0.028451	0.022263
g__Sporomusa	-1.71	0.1325	0.5004	no	down	0.0181	0.0085	0.0278	0	0.004615	0	0	0	0.063067	0	0	0	0.039078	0	0.040403	0.031392	0.045349	0.066385	0
g__Curvibacter	-1.64	0.1415	0.5004	no	down	0.5666	0.2747	0.8586	0.165598	0.367687	0.037604	0.077928	0.127332	0.556473	0.293192	0.57149	0.470285	0.304481	1.007	0.297364	0.086329	0.5003	0.486826	3.71607
g__Gardnerella	-Inf	0.1441	0.5004	no	down	0.0631	0	0.1263	0	0	0	0	0	0	0	0	0	0	0	0	0.004709	0	0	1.00555
g__Lachnospira	Inf	0.1441	0.5004	no	up	0.0211	0.0423	0	0.024664	0	0	0	0	0	0	0.31334	0	0	0	0	0	0	0	0
g__Sphingomonadales_unclassified	-Inf	0.1441	0.5004	no	down	0.0155	0	0.031	0	0	0	0	0	0	0	0	0	0.004885	0	0	0	0.242836	0	0
g__Citricoccus	-Inf	0.1441	0.5004	no	down	0.0109	0	0.0218	0	0	0	0	0	0	0	0	0	0.164452	0	0	0	0.01024	0	0
g__Pseudacidovorax	-Inf	0.1441	0.5004	no	down	0.0081	0	0.0162	0	0	0	0	0	0	0	0	0	0	0	0.021009	0	0.108252	0	0
g__Faecalitalea	-Inf	0.1441	0.5004	no	down	0.0074	0	0.0148	0	0	0	0	0	0	0	0	0	0	0.003843	0	0.114582	0	0	0
g__Blastococcus	Inf	0.1441	0.5004	no	up	0.0066	0.0132	0	0	0.099998	0	0	0	0	0	0.005341	0	0	0	0	0	0	0	0
g__Ilumatobacter	-Inf	0.1441	0.5004	no	down	0.0065	0	0.0131	0	0	0	0	0	0	0	0	0	0	0	0.037171	0.067493	0	0	0
g__Phreatobacter	Inf	0.1441	0.5004	no	up	0.0042	0.0083	0	0.008808	0	0	0	0	0	0.05765	0	0	0	0	0	0	0	0	0
g__Firmicutes_unclassified	Inf	0.1441	0.5004	no	up	0.0041	0.0082	0	0.035234	0	0	0	0	0	0	0.030266	0	0	0	0	0	0	0	0
g__Ruminococcaceae_UCG-003	Inf	0.1441	0.5004	no	up	0.0041	0.0082	0	0.058135	0	0	0	0	0	0	0.007121	0	0	0	0	0	0	0	0
g__Pseudohongiella	-Inf	0.1441	0.5004	no	down	0.0013	0	0.0026	0	0	0	0	0	0	0	0	0	0	0	0.003232	0.017266	0	0	0
g__Rhizobacter	4.42	0.1476	0.5004	no	up	0.0236	0.0451	0.0021	0	0.172305	0	0.05348	0	0.070487	0.064239	0	0	0	0	0	0.007848	0.008777	0	0
g__Pseudomonas	-0.45	0.1722	0.5004	no	down	38.8126	32.7666	44.8585	42.7137	43.2163	16.7272	12.5143	31.4864	30.5077	45.9637	39.0037	61.3739	42.6745	54.3662	26.3232	31.7815	40.9412	61.8237	39.5837
g__Subgroup_7_unclassified	-0.8	0.1722	0.5004	no	down	0.4874	0.3558	0.619	0.542597	0.435378	0.188019	0.169608	0.245822	0.600991	0.332724	0.331144	0.31004	0.263775	1.02237	0.276355	0.40339	0.570517	1.18545	0.920206
g__Flavisolibacter	-2.43	0.197	0.5004	no	down	0.0396	0.0124	0.0668	0	0	0	0	0.021222	0.00742	0.070827	0	0.186372	0	0.071105	0	0.249568	0	0.003161	0.024118
g__Ramlibacter	-1.17	0.2237	0.5004	no	down	0.0602	0.0371	0.0833	0.105701	0	0.085017	0	0	0.014839	0.021413	0.069433	0.160245	0.030937	0.036513	0	0.012557	0.187247	0.18335	0.055658
g__Sphingopyxis	-1.75	0.2268	0.5004	no	down	0.1204	0.0553	0.1855	0.040519	0.004615	0	0.055008	0.081351	0.090891	0.125183	0.044509	0.874382	0.013026	0.167192	0.061412	0.056506	0.099475	0.211801	0
g__GCA-900066575	-3.42	0.2409	0.5004	no	down	0.0181	0.0031	0.0331	0	0	0	0	0	0	0	0.024925	0	0	0	0.003232	0.062784	0	0	0.198512
g__Bifidobacterium	-5.87	0.2409	0.5004	no	down	0.0178	0.0006	0.035	0	0	0.004905	0	0	0	0	0	0	0	0	0	0.269973	0	0.006322	0.003711
g__Cloacibacterium	-3.61	0.2409	0.5004	no	down	0.0125	0.0019	0.0232	0	0	0	0	0	0	0.014824	0	0	0	0	0.009697	0.130278	0.045349	0	0
g__Caenimonas	-1.45	0.241	0.5004	no	down	0.0604	0.0323	0.0885	0.01057	0	0.065398	0.013752	0.148554	0	0.019766	0	0.254302	0.086297	0	0.012929	0.20405	0	0.031612	0.118736
g__Ralstonia	-1.47	0.2466	0.5004	no	down	0.0797	0.0422	0.1172	0	0.013846	0	0.016808	0.086657	0.057502	0.013177	0.149549	0.027869	0.042334	0.136444	0.048483	0.04081	0	0.116965	0.525037
g__Phyllobacterium	1.1	0.2472	0.5004	no	up	0.053	0.0722	0.0337	0	0	0	0.103904	0.040676	0.040808	0.148243	0.243907	0.149794	0	0	0	0	0.119955	0	0
g__Sphingomonas	-0.43	0.248	0.5004	no	down	8.7168	7.4186	10.015	11.2607	10.3798	4.90321	4.43884	5.21708	5.24754	9.59958	8.30173	5.4257	13.8189	4.1183	15.0234	11.1003	13.4686	4.18386	12.9812
g__Candidatus_Microthrix	-0.41	0.248	0.5004	no	down	0.247	0.2117	0.2822	0.332958	0.106152	0	0.116128	0.293571	0.220734	0.408493	0.215421	0.229917	0.232838	0.486202	0.32807	0.260556	0.179932	0.423602	0.116881
g__Azohydromonas	-0.96	0.2866	0.5004	no	down	0.0377	0.0256	0.0498	0	0.003077	0	0	0	0	0.143302	0.058751	0	0.050475	0	0.169691	0.078481	0.007314	0	0.092763
g__Amaricoccus	-4.19	0.3008	0.5004	no	down	0.0423	0.0044	0.0803	0	0	0	0	0	0.035243	0	0	0	0	0.007687	0	0	0.035109	0	0.599247
g__Papillibacter	-Inf	0.3173	0.5004	no	down	0.0488	0	0.0975	0	0	0	0	0	0	0	0	0.780325	0	0	0	0	0	0	0
g__Paludibaculum	-Inf	0.3173	0.5004	no	down	0.0242	0	0.0485	0	0	0	0	0	0	0	0	0	0	0	0	0	0	0	0.387748
g__Lachnoclostridium	-Inf	0.3173	0.5004	no	down	0.0232	0	0.0465	0	0	0	0	0	0	0	0	0	0	0	0	0.371998	0	0	0
g__Kocuria	-Inf	0.3173	0.5004	no	down	0.0224	0	0.0448	0	0	0	0	0	0	0	0	0	0	0	0	0	0	0.358797	0
g__Psychrobacter	-Inf	0.3173	0.5004	no	down	0.0209	0	0.0418	0	0	0	0	0	0	0	0	0.334425	0	0	0	0	0	0	0
g__Ureaplasma	-Inf	0.3173	0.5004	no	down	0.0204	0	0.0408	0	0	0	0	0	0	0	0	0	0	0	0	0	0	0	0.326525
g__Carnobacterium	-Inf	0.3173	0.5004	no	down	0.0201	0	0.0401	0	0	0	0	0	0	0	0	0	0	0	0	0	0	0	0.320959
g__Gilliamella	-Inf	0.3173	0.5004	no	down	0.0199	0	0.0399	0	0	0	0	0	0	0	0	0	0	0	0	0	0	0	0.319104
g__Denitratisoma	-Inf	0.3173	0.5004	no	down	0.019	0	0.038	0	0	0	0	0	0	0	0	0	0	0.303636	0	0	0	0	0
g__Burkholderiaceae_unclassified	-Inf	0.3173	0.5004	no	down	0.0184	0	0.0368	0	0	0	0	0	0	0	0	0	0	0.294027	0	0	0	0	0
g__Cnuella	-Inf	0.3173	0.5004	no	down	0.0162	0	0.0325	0	0	0	0	0	0	0	0	0	0	0	0	0	0	0	0.259735
g__Intestinibacter	-Inf	0.3173	0.5004	no	down	0.0134	0	0.0269	0	0	0	0	0	0	0	0	0	0	0	0	0.215037	0	0	0
g__Proteus	-Inf	0.3173	0.5004	no	down	0.0131	0	0.0263	0	0	0	0	0	0	0	0	0	0	0	0	0.210328	0	0	0
g__Ruminococcaceae_NK4A214_group	-Inf	0.3173	0.5004	no	down	0.0127	0	0.0253	0	0	0	0	0	0	0	0	0	0	0	0	0.20248	0	0	0
g__Sphingobacterium	-Inf	0.3173	0.5004	no	down	0.0125	0	0.025	0	0	0	0	0	0	0	0	0	0	0	0	0	0	0	0.200367
g__Oscillibacter	-Inf	0.3173	0.5004	no	down	0.0117	0	0.0233	0	0	0	0	0	0	0	0	0	0	0	0	0.186784	0	0	0
g__JG36-GS-52_unclassified	-Inf	0.3173	0.5004	no	down	0.011	0	0.022	0	0	0	0	0	0	0	0	0	0.17585	0	0	0	0	0	0
g__Flavonifractor	-Inf	0.3173	0.5004	no	down	0.011	0	0.022	0	0	0	0	0	0	0	0	0	0	0	0	0.175797	0	0	0
g__A4b_unclassified	Inf	0.3173	0.5004	no	up	0.0093	0.0187	0	0	0	0	0	0	0	0	0.149549	0	0	0	0	0	0	0	0
g__Bdellovibrio	-Inf	0.3173	0.5004	no	down	0.0089	0	0.0179	0	0	0	0	0	0	0	0	0	0	0	0	0	0	0	0.142854
g__Anaerostipes	Inf	0.3173	0.5004	no	up	0.0085	0.017	0	0.135649	0	0	0	0	0	0	0	0	0	0	0	0	0	0	0
g__Bacilli_unclassified	Inf	0.3173	0.5004	no	up	0.0085	0.0169	0	0	0	0	0	0	0.135408	0	0	0	0	0	0	0	0	0	0
g__Eubacterium]_eligens_group	-Inf	0.3173	0.5004	no	down	0.0081	0	0.0163	0	0	0	0	0	0	0	0	0	0	0	0	0.130278	0	0	0
g__Anaeromyxobacter	-Inf	0.3173	0.5004	no	down	0.008	0	0.0161	0	0	0	0	0	0	0	0	0	0	0	0	0	0.128732	0	0
g__Peptostreptococcaceae_unclassified	Inf	0.3173	0.5004	no	up	0.0079	0.0159	0	0.126841	0	0	0	0	0	0	0	0	0	0	0	0	0	0	0
g__Alloprevotella	-Inf	0.3173	0.5004	no	down	0.0077	0	0.0154	0	0	0	0	0	0	0	0	0	0	0.122992	0	0	0	0	0
g__Desulfovibrio	Inf	0.3173	0.5004	no	up	0.0075	0.0149	0	0	0	0	0	0	0	0	0.119283	0	0	0	0	0	0	0	0
g__Coxiella	-Inf	0.3173	0.5004	no	down	0.0069	0	0.0137	0	0	0	0	0	0	0	0	0.109733	0	0	0	0	0	0	0
g__Lysobacter	Inf	0.3173	0.5004	no	up	0.0068	0.0137	0	0.109224	0	0	0	0	0	0	0	0	0	0	0	0	0	0	0
g__Brachybacterium	-Inf	0.3173	0.5004	no	down	0.0065	0	0.013	0	0	0	0	0	0	0	0	0	0	0.103774	0	0	0	0	0
g__UBA1819	-Inf	0.3173	0.5004	no	down	0.0062	0	0.0124	0	0	0	0	0	0	0	0	0	0	0	0	0.098886	0	0	0
g__Longimicrobiaceae_unclassified	-Inf	0.3173	0.5004	no	down	0.0061	0	0.0123	0	0	0	0	0	0	0	0	0	0	0	0	0	0	0	0.098328
g__Truepera	Inf	0.3173	0.5004	no	up	0.0061	0.0121	0	0	0	0	0	0	0	0.097182	0	0	0	0	0	0	0	0	0
g__Fodinicola	Inf	0.3173	0.5004	no	up	0.0056	0.0112	0	0.089846	0	0	0	0	0	0	0	0	0	0	0	0	0	0	0
g__Eubacterium]_ruminantium_group	Inf	0.3173	0.5004	no	up	0.0055	0.0109	0	0	0	0	0	0	0	0	0.087237	0	0	0	0	0	0	0	0
g__Agathobacter	Inf	0.3173	0.5004	no	up	0.0053	0.0106	0	0.084561	0	0	0	0	0	0	0	0	0	0	0	0	0	0	0
g__Hyphomicrobium	-Inf	0.3173	0.5004	no	down	0.0053	0	0.0106	0	0	0	0	0	0	0	0	0	0	0.084557	0	0	0	0	0
g__Christensenellaceae_R-7_group	Inf	0.3173	0.5004	no	up	0.0049	0.0098	0	0	0	0	0	0	0	0	0.078335	0	0	0	0	0	0	0	0
g__Pantoea	Inf	0.3173	0.5004	no	up	0.0048	0.0097	0	0.077514	0	0	0	0	0	0	0	0	0	0	0	0	0	0	0
g__Ruminococcaceae_UCG-005	Inf	0.3173	0.5004	no	up	0.0047	0.0093	0	0	0	0	0	0	0	0	0.074774	0	0	0	0	0	0	0	0
g__Microbacterium	-Inf	0.3173	0.5004	no	down	0.0046	0	0.0091	0	0	0	0	0	0	0	0	0	0	0.073026	0	0	0	0	0
g__Ruminococcaceae_unclassified	-Inf	0.3173	0.5004	no	down	0.0045	0	0.009	0	0	0	0	0	0	0	0	0	0	0	0	0.072202	0	0	0
g__Dorea	-Inf	0.3173	0.5004	no	down	0.0044	0	0.0088	0	0	0	0	0	0	0	0	0	0	0	0	0.070633	0	0	0
g__Saccharimonadaceae_unclassified	Inf	0.3173	0.5004	no	up	0.0044	0.0088	0	0.070467	0	0	0	0	0	0	0	0	0	0	0	0	0	0	0
g__Janibacter	Inf	0.3173	0.5004	no	up	0.0041	0.0082	0	0	0	0	0.065704	0	0	0	0	0	0	0	0	0	0	0	0
g__Megamonas	Inf	0.3173	0.5004	no	up	0.004	0.0081	0	0	0.064614	0	0	0	0	0	0	0	0	0	0	0	0	0	0
g__Negativicoccus	-Inf	0.3173	0.5004	no	down	0.004	0	0.008	0	0	0	0	0	0	0	0	0	0	0	0	0.064354	0	0	0
g__Bacteroidetes_vadinHA17_unclassified	Inf	0.3173	0.5004	no	up	0.004	0.008	0	0	0	0	0	0.063666	0	0	0	0	0	0	0	0	0	0	0
g__Eggerthella	-Inf	0.3173	0.5004	no	down	0.0039	0	0.0078	0	0	0	0	0	0	0	0	0	0	0	0	0.062784	0	0	0
g__Shinella	Inf	0.3173	0.5004	no	up	0.0039	0.0078	0	0	0	0	0.062648	0	0	0	0	0	0	0	0	0	0	0	0
g__Erysipelatoclostridium	-Inf	0.3173	0.5004	no	down	0.0038	0	0.0077	0	0	0	0	0	0	0	0	0	0	0	0	0.061215	0	0	0
g__Piscinibacter	Inf	0.3173	0.5004	no	up	0.0034	0.0069	0	0	0	0	0	0	0	0	0.055191	0	0	0	0	0	0	0	0
g__Enterobacter	-Inf	0.3173	0.5004	no	down	0.0034	0	0.0067	0	0	0	0	0	0	0	0	0	0	0	0	0	0	0	0.053802
g__Anaerobranca	-Inf	0.3173	0.5004	no	down	0.003	0	0.0059	0	0	0	0	0	0	0	0	0	0	0	0	0	0	0.047418	0
g__Luteibacter	Inf	0.3173	0.5004	no	up	0.0029	0.0058	0	0	0	0	0	0	0.046373	0	0	0	0	0	0	0	0	0	0
g__Actinomyces	Inf	0.3173	0.5004	no	up	0.0029	0.0058	0	0	0.046153	0	0	0	0	0	0	0	0	0	0	0	0	0	0
g__Clostridium]_innocuum_group	-Inf	0.3173	0.5004	no	down	0.0028	0	0.0057	0	0	0	0	0	0	0	0	0	0	0	0	0.045519	0	0	0
g__Sellimonas	-Inf	0.3173	0.5004	no	down	0.0028	0	0.0057	0	0	0	0	0	0	0	0	0	0	0	0	0.045519	0	0	0
g__Mitsuaria	Inf	0.3173	0.5004	no	up	0.0026	0.0052	0	0	0.041538	0	0	0	0	0	0	0	0	0	0	0	0	0	0
g__Acetatifactor	Inf	0.3173	0.5004	no	up	0.0025	0.0051	0	0.040519	0	0	0	0	0	0	0	0	0	0	0	0	0	0	0
g__Acidibacter	Inf	0.3173	0.5004	no	up	0.0023	0.0045	0	0	0	0	0	0	0	0.036237	0	0	0	0	0	0	0	0	0
g__Propionivibrio	-Inf	0.3173	0.5004	no	down	0.0023	0	0.0045	0	0	0	0	0	0	0	0	0	0	0	0	0.036101	0	0	0
g__Rhizobiales_unclassified	Inf	0.3173	0.5004	no	up	0.0022	0.0044	0	0.035234	0	0	0	0	0	0	0	0	0	0	0	0	0	0	0
g__Clostridium_sensu_stricto_1	-Inf	0.3173	0.5004	no	down	0.0021	0	0.0041	0	0	0	0	0	0	0	0	0	0	0	0	0.032962	0	0	0
g__Clostridium	Inf	0.3173	0.5004	no	up	0.002	0.004	0	0	0	0	0	0	0	0	0.032046	0	0	0	0	0	0	0	0
g__Georgenia	Inf	0.3173	0.5004	no	up	0.002	0.004	0	0	0	0	0	0.031833	0	0	0	0	0	0	0	0	0	0	0
g__Ruminococcaceae_UCG-004	-Inf	0.3173	0.5004	no	down	0.002	0	0.0039	0	0	0	0	0	0	0	0	0	0	0	0	0.031392	0	0	0
g__Ruminococcaceae_UCG-014	-Inf	0.3173	0.5004	no	down	0.002	0	0.0039	0	0	0	0	0	0	0	0	0	0	0	0	0.031392	0	0	0
g__Pseudorhodoferax	Inf	0.3173	0.5004	no	up	0.0019	0.0039	0	0	0	0.031064	0	0	0	0	0	0	0	0	0	0	0	0	0
g__Myxococcus	-Inf	0.3173	0.5004	no	down	0.0019	0	0.0039	0	0	0	0	0	0	0	0	0	0.030937	0	0	0	0	0	0
g__Myroides	Inf	0.3173	0.5004	no	up	0.0019	0.0038	0	0	0.030769	0	0	0	0	0	0	0	0	0	0	0	0	0	0
g__Peptostreptococcus	-Inf	0.3173	0.5004	no	down	0.0019	0	0.0037	0	0	0	0	0	0	0	0	0	0	0	0	0.029823	0	0	0
g__Serratia	-Inf	0.3173	0.5004	no	down	0.0017	0	0.0035	0	0	0	0	0	0	0	0	0.027869	0	0	0	0	0	0	0
g__Bilophila	Inf	0.3173	0.5004	no	up	0.0017	0.0035	0	0	0.027692	0	0	0	0	0	0	0	0	0	0	0	0	0	0
g__Thermomonas	-Inf	0.3173	0.5004	no	down	0.0016	0	0.0033	0	0	0	0	0	0	0	0	0	0.026052	0	0	0	0	0	0
g__Pirellulaceae_unclassified	-Inf	0.3173	0.5004	no	down	0.0016	0	0.0032	0	0	0	0	0	0	0	0	0	0	0	0	0	0	0	0.025974
g__Oceanivirga	Inf	0.3173	0.5004	no	up	0.0016	0.0032	0	0	0	0	0	0	0.025969	0	0	0	0	0	0	0	0	0	0
g__AB1_unclassified	-Inf	0.3173	0.5004	no	down	0.0016	0	0.0031	0	0	0	0	0	0	0	0	0	0	0	0	0.025114	0	0	0
g__Ruminiclostridium_9	-Inf	0.3173	0.5004	no	down	0.0016	0	0.0031	0	0	0	0	0	0	0	0	0	0	0	0	0.025114	0	0	0
g__Vermiphilaceae_unclassified	-Inf	0.3173	0.5004	no	down	0.0015	0	0.0031	0	0	0	0	0	0	0	0	0	0.024424	0	0	0	0	0	0
g__Renibacterium	-Inf	0.3173	0.5004	no	down	0.0014	0	0.0029	0	0	0	0	0	0	0	0	0	0	0.023061	0	0	0	0	0
g__Akkermansia	Inf	0.3173	0.5004	no	up	0.0013	0.0027	0	0	0	0	0	0	0	0	0.021364	0	0	0	0	0	0	0	0
g__Rickettsia	Inf	0.3173	0.5004	no	up	0.0013	0.0027	0	0	0	0.021254	0	0	0	0	0	0	0	0	0	0	0	0	0
g__Parasegetibacter	Inf	0.3173	0.5004	no	up	0.0012	0.0025	0	0	0.02	0	0	0	0	0	0	0	0	0	0	0	0	0	0
g__Tatumella	-Inf	0.3173	0.5004	no	down	0.0012	0	0.0024	0	0	0	0	0	0	0	0	0	0	0.019217	0	0	0	0	0
g__Terrisporobacter	-Inf	0.3173	0.5004	no	down	0.0012	0	0.0024	0	0	0	0	0	0	0	0	0	0	0	0	0.018835	0	0	0
g__Acidisphaera	Inf	0.3173	0.5004	no	up	0.0011	0.0023	0	0	0	0	0	0	0	0.018119	0	0	0	0	0	0	0	0	0
g__Hydrocarboniphaga	-Inf	0.3173	0.5004	no	down	0.0011	0	0.0022	0	0	0	0	0	0	0	0	0	0.017911	0	0	0	0	0	0
g__Luteimonas	-Inf	0.3173	0.5004	no	down	0.0011	0	0.0022	0	0	0	0	0	0	0	0	0	0	0	0.017777	0	0	0	0
g__Youngiibacter	-Inf	0.3173	0.5004	no	down	0.0011	0	0.0022	0	0	0	0	0	0	0	0	0	0	0	0.017777	0	0	0	0
g__Paucibacter	-Inf	0.3173	0.5004	no	down	0.0011	0	0.0022	0	0	0	0	0	0	0	0	0	0	0	0	0	0.017554	0	0
g__Fusicatenibacter	-Inf	0.3173	0.5004	no	down	0.0011	0	0.0022	0	0	0	0	0	0	0	0	0	0	0	0	0.017266	0	0	0
g__0319-6G20_unclassified	Inf	0.3173	0.5004	no	up	0.0011	0.0021	0	0	0	0	0.016808	0	0	0	0	0	0	0	0	0	0	0	0
g__Zoogloea	-Inf	0.3173	0.5004	no	down	0.001	0	0.0021	0	0	0	0	0	0	0	0	0	0	0	0	0	0	0	0.016697
g__Veillonella	Inf	0.3173	0.5004	no	up	0.001	0.002	0	0	0	0	0	0.015917	0	0	0	0	0	0	0	0	0	0	0
g__Lachnospiraceae_UCG-004	-Inf	0.3173	0.5004	no	down	0.0009	0	0.0018	0	0	0	0	0	0	0	0	0	0	0	0	0.014127	0	0	0
g__Planctopirus	-Inf	0.3173	0.5004	no	down	0.0007	0	0.0014	0	0	0	0	0	0	0	0	0	0	0.01153	0	0	0	0	0
g__Dubosiella	-Inf	0.3173	0.5004	no	down	0.0007	0	0.0014	0	0	0	0	0	0	0	0	0	0	0	0.011313	0	0	0	0
g__Hirschia	Inf	0.3173	0.5004	no	up	0.0007	0.0014	0	0	0	0	0	0	0.011129	0	0	0	0	0	0	0	0	0	0
g__Collinsella	Inf	0.3173	0.5004	no	up	0.0007	0.0013	0	0	0.010769	0	0	0	0	0	0	0	0	0	0	0	0	0	0
g__Hymenobacter	Inf	0.3173	0.5004	no	up	0.0006	0.0012	0	0	0	0	0	0	0	0.009883	0	0	0	0	0	0	0	0	0
g__Xanthobacter	-Inf	0.3173	0.5004	no	down	0.0006	0	0.0012	0	0	0	0	0	0	0	0	0	0	0	0.009697	0	0	0	0
g__Roseburia	Inf	0.3173	0.5004	no	up	0.0006	0.0012	0	0	0	0	0	0	0.009275	0	0	0	0	0	0	0	0	0	0
g__Eubacterium]_xylanophilum_group	Inf	0.3173	0.5004	no	up	0.0006	0.0011	0	0	0	0	0	0	0	0	0.008902	0	0	0	0	0	0	0	0
g__RB41	Inf	0.3173	0.5004	no	up	0.0005	0.001	0	0	0	0	0	0	0	0.008236	0	0	0	0	0	0	0	0	0
g__Noviherbaspirillum	-Inf	0.3173	0.5004	no	down	0.0005	0	0.0009	0	0	0	0	0	0	0	0	0	0	0	0	0	0.007314	0	0
g__Clostridiales_unclassified	Inf	0.3173	0.5004	no	up	0.0004	0.0009	0	0	0	0	0	0	0	0	0.007121	0	0	0	0	0	0	0	0
g__Glucerabacter	-Inf	0.3173	0.5004	no	down	0.0004	0	0.0008	0	0	0	0	0	0	0	0	0	0	0	0	0.006278	0	0	0
g__Lysinimonas	Inf	0.3173	0.5004	no	up	0.0004	0.0008	0	0	0.006154	0	0	0	0	0	0	0	0	0	0	0	0	0	0
g__SS1-B-06-26_unclassified	-Inf	0.3173	0.5004	no	down	0.0004	0	0.0007	0	0	0	0	0	0	0	0	0	0	0	0	0	0.005851	0	0
g__Tsukamurella	-Inf	0.3173	0.5004	no	down	0.0004	0	0.0007	0	0	0	0	0	0	0	0	0	0	0	0	0	0.005851	0	0
g__KCM-B-112	Inf	0.3173	0.5004	no	up	0.0003	0.0007	0	0	0	0	0	0	0.005565	0	0	0	0	0	0	0	0	0	0
g__Candidatus_Solibacter	Inf	0.3173	0.5004	no	up	0.0003	0.0007	0	0	0	0	0	0	0	0	0.005341	0	0	0	0	0	0	0	0
g__Negativibacillus	Inf	0.3173	0.5004	no	up	0.0003	0.0007	0	0	0	0	0	0	0	0	0.005341	0	0	0	0	0	0	0	0
g__Gemmatimonas	Inf	0.3173	0.5004	no	up	0.0003	0.0007	0	0.005285	0	0	0	0	0	0	0	0	0	0	0	0	0	0	0
g__Psychroglaciecola	-Inf	0.3173	0.5004	no	down	0.0003	0	0.0007	0	0	0	0	0	0	0	0	0.005225	0	0	0	0	0	0	0
g__Obscuribacterales_unclassified	-Inf	0.3173	0.5004	no	down	0.0003	0	0.0006	0	0	0	0	0	0	0	0	0	0	0	0.004848	0	0	0	0
g__Prevotella_7	-Inf	0.3173	0.5004	no	down	0.0003	0	0.0006	0	0	0	0	0	0	0	0	0	0	0	0	0.004709	0	0	0
g__Flavitalea	Inf	0.3173	0.5004	no	up	0.0003	0.0006	0	0	0.004615	0	0	0	0	0	0	0	0	0	0	0	0	0	0
g__Citrobacter	Inf	0.3173	0.5004	no	up	0.0002	0.0004	0	0	0	0.00327	0	0	0	0	0	0	0	0	0	0	0	0	0
g__Clostridiales_Family_XIV._Incertae_Sedis_unclassified	-Inf	0.3173	0.5004	no	down	0.0002	0	0.0004	0	0	0	0	0	0	0	0	0	0	0	0	0.003139	0	0	0
g__Fusobacterium	Inf	0.3173	0.5004	no	up	0.0002	0.0004	0	0	0	0	0.003056	0	0	0	0	0	0	0	0	0	0	0	0
g__Rhodococcus	-1.32	0.3238	0.5078	no	down	0.1008	0.0577	0.1438	0.190261	0.016923	0	0.019864	0.088425	0.011129	0.135066	0	0	0.039078	0	0	0	0.033646	0	1.0779
g__Escherichia-Shigella	-3.72	0.3698	0.5706	no	down	0.0617	0.0087	0.1146	0	0	0	0.027504	0	0	0.003294	0.039168	0	0	0	0	0.916654	0	0	0
g__Lawsonella	-0.22	0.3698	0.5706	no	down	0.0059	0.0055	0.0064	0.044042	0	0	0	0	0	0	0	0.013934	0.024424	0	0	0.012557	0	0	0
g__Phyllobacteriaceae_unclassified	0.77	0.3698	0.5706	no	up	0.005	0.0063	0.0037	0.028187	0	0.008175	0	0.014148	0	0	0	0	0	0	0	0.029823	0	0	0
g__Achromobacter	1.13	0.3973	0.6054	no	up	0.0455	0.0625	0.0285	0.218448	0.046153	0.017984	0	0.084888	0.022259	0.110359	0	0.033094	0	0.061496	0.009697	0.021975	0.083383	0	0.018553
g__Duganella	0.76	0.4002	0.6054	no	up	0.02	0.0252	0.0149	0.072229	0.079999	0.022889	0.013752	0.01238	0	0	0	0	0	0	0.021009	0.026683	0.07168	0	0
g__Mitochondria_unclassified	-1.87	0.4005	0.6054	no	down	0.2166	0.0931	0.34	0.100416	0	0.045779	0.294904	0.091962	0.183636	0	0.028485	0.933603	0.753875	0.0884	0.072725	0.764401	0.019017	0.02529	0.063079
g__Sphingobium	-0.1	0.4008	0.6054	no	down	0.6925	0.6696	0.7154	1.6824	0.664605	0.392388	0.316296	0.718012	0.41179	0.532029	0.639143	0.430224	0.867852	0.269045	1.06017	0.585465	0.674381	0.695465	1.14098
g__Lautropia	1.07	0.4179	0.6279	no	up	0.0198	0.0269	0.0128	0	0.044615	0	0	0.086657	0.070487	0.013177	0	0.03832	0	0.057652	0	0	0	0.006322	0
g__Methylobacterium	0.57	0.4275	0.6362	no	up	0.0687	0.0821	0.0553	0.086322	0.056922	0.00981	0.097792	0.04775	0.050083	0.308017	0	0.040061	0.08304	0	0.027474	0.141265	0	0	0.150276
g__Finegoldia	-6.01	0.4411	0.6362	no	down	0.0261	0.0008	0.0514	0	0	0	0	0	0	0.006589	0	0	0.048847	0	0	0.36258	0	0	0
g__Methylotenera	3.24	0.4411	0.6362	no	up	0.0083	0.0151	0.0016	0	0	0	0	0	0.10573	0.014824	0	0	0	0	0	0	0	0	0.012987
g__Skermanella	-3.6	0.4411	0.6362	no	down	0.0079	0.0012	0.0146	0	0	0.00981	0	0	0	0	0	0	0.03745	0	0.079189	0	0	0	0
g__Sutterella	2.14	0.4411	0.6362	no	up	0.0079	0.0128	0.0029	0.061659	0	0	0	0	0	0	0.040948	0	0	0	0	0.023544	0	0	0
g__Pseudolabrys	-2.22	0.4411	0.6362	no	down	0.0068	0.0024	0.0112	0	0	0	0	0	0	0	0.019584	0	0	0	0	0.036101	0	0.05374	0
g__Elizabethkingia	-2.9	0.4411	0.6362	no	down	0.0055	0.0013	0.0097	0	0	0	0	0.010611	0	0	0	0	0	0	0.051716	0	0	0	0.025974
g__Anaerococcus	-3.89	0.4411	0.6362	no	down	0.0048	0.0006	0.0089	0	0.004615	0	0	0	0	0	0	0	0	0.048044	0	0.023544	0	0	0
g__Staphylococcus	-3.09	0.4555	0.6471	no	down	0.3315	0.0699	0.5932	0.04228	0.084614	0	0.019864	0.109647	0	0.303075	0	0.024385	0	3.15359	0.694927	0.006278	0.049737	0	0.816311
g__Bradyrhizobium	-1.13	0.4609	0.6471	no	down	0.1144	0.0717	0.1571	0.139173	0.129229	0.062128	0	0.022991	0.113149	0	0.10682	0.327458	0.050475	0.0884	0	0.075341	0.033646	0.263961	0.417432
g__Cupriavidus	-0.73	0.4619	0.6471	no	down	0.105	0.079	0.1309	0.082799	0.032307	0.00981	0.00764	0.017685	0.055647	0.166362	0.25993	0	0.280057	0	0.303829	0.087898	0.049737	0.229187	0.096473
g__Massilia	0.16	0.4622	0.6471	no	up	1.1682	1.2346	1.1018	1.33888	0.964601	0.601661	0.449232	1.29808	0.836564	1.77398	2.61354	0.205532	1.28794	0.240218	3.72028	1.30435	1.37217	0.066385	0.617799
g__Clostridium_sensu_stricto_8	-0.61	0.4622	0.6471	no	down	0.2786	0.2202	0.3371	0.158551	0.34461	0.073573	0.128352	0.34309	0.122424	0.224012	0.36675	0.350101	0.167709	0.932047	0.126057	0.100455	0.263316	0.575339	0.181815
g__Lutispora	-0.31	0.4622	0.6471	no	down	0.2369	0.2119	0.262	0.258967	0.421532	0.098097	0.128352	0.169776	0.218879	0.298134	0.101479	0.367519	0.392406	0.278653	0.075957	0.144404	0.193098	0.459955	0.18367
g__JG30-KF-CM45_unclassified	-0.5	0.469	0.6503	no	down	0.0243	0.0201	0.0284	0	0.012308	0.00327	0	0.060129	0.085326	0	0	0.034836	0	0	0.192317	0	0	0	0
g__Corynebacterium_1	0	0.469	0.6503	no	no	0.0134	0.0134	0.0134	0.081037	0.026153	0	0	0	0	0	0	0	0	0.030748	0	0.054936	0.016092	0	0.005566
g__Faecalibacterium	0.76	0.4875	0.6694	no	up	0.0843	0.1061	0.0625	0.362906	0.055384	0	0	0	0.037098	0	0.393455	0	0.016282	0	0	0.24172	0	0.241832	0
g__Sphingorhabdus	0.17	0.4875	0.6694	no	up	0.0274	0.0291	0.0258	0.056374	0	0	0	0.04775	0.031533	0.097182	0	0	0.009769	0.190253	0	0.006278	0	0	0
g__Xenophilus	-0.41	0.5176	0.7074	no	down	0.0832	0.0714	0.0951	0.072229	0.081537	0.016349	0.025976	0	0	0.296487	0.078335	0	0.047219	0	0.442814	0.023544	0.247224	0	0
g__Caulobacter	-0.28	0.5286	0.7079	no	down	0.3417	0.3086	0.3749	0.590163	0.14769	0.160225	0.247536	0.321868	0.191056	0.550147	0.25993	0.188114	0.436368	0.553463	0.218175	0.684351	0.174081	0.488406	0.256025
g__Subgroup_6_unclassified	0.01	0.5286	0.7079	no	up	0.1755	0.1759	0.1751	0.183215	0.223073	0.058858	0.116128	0.088425	0.129844	0.278368	0.329363	0.163729	0.113977	0.57268	0.151914	0.010987	0.125806	0.044257	0.217065
g__Variovorax	1.17	0.5377	0.7079	no	up	0.031	0.0429	0.019	0	0	0	0.097792	0	0	0	0.245687	0	0	0	0	0	0	0.151738	0
g__Subdoligranulum	0.53	0.5377	0.7079	no	up	0.029	0.0343	0.0237	0	0	0	0	0	0.00371	0	0.270612	0	0	0	0	0	0	0.189672	0
g__Luteitalea	-0.95	0.5377	0.7079	no	down	0.0181	0.0124	0.0239	0	0	0	0	0	0	0.098829	0	0.182889	0	0	0.008081	0	0	0	0
g__Janthinobacterium	-0.81	0.5377	0.7079	no	down	0.0153	0.0111	0.0194	0	0	0	0	0	0	0.088946	0	0	0	0	0.100199	0.054936	0	0	0
g__Blastomonas	1.05	0.5377	0.7079	no	up	0.0085	0.0114	0.0055	0	0	0	0.036672	0.054824	0	0	0	0	0	0	0	0	0.043886	0	0
g__Qipengyuania	-1.13	0.5377	0.7079	no	down	0.0043	0.0027	0.0059	0	0.021538	0	0	0	0	0	0	0	0	0	0.012929	0.034531	0	0	0
g__Bacteroides	-0.67	0.5463	0.7159	no	down	0.0765	0.0592	0.0939	0.058135	0	0	0	0.003537	0.009275	0	0.402357	0.069672	0	0	0	0.681212	0	0	0
g__unclassified	1.89	0.5871	0.7659	no	up	0.026	0.0409	0.011	0	0	0	0	0.095499	0.051937	0	0.179814	0.006967	0	0	0.035554	0.045519	0	0	0
g__Mesorhizobium	-0.9	0.5984	0.7716	no	down	0.1077	0.0751	0.1403	0.044042	0.16769	0.016349	0.073344	0.182156	0.116859	0	0	0	0.180735	0.586133	0.054948	0.026683	0.147749	0.033193	0.092763
g__Burkholderiales_unclassified	-0.24	0.5984	0.7716	no	down	0.0634	0.0581	0.0687	0.049327	0.081537	0.014715	0.06876	0	0.048228	0.202599	0	0	0.084668	0.115305	0.103431	0.169518	0.046812	0.011064	0.018553
g__Patulibacter	-0.5	0.5995	0.7716	no	down	1.0326	0.8542	1.2111	1.13276	0.743065	0.284481	0.449232	0.866566	0.912615	1.12006	1.32457	0.357068	0.646411	3.03636	0.420188	0.97316	1.26392	1.88566	1.10573
g__Ottowia	1.53	0.6095	0.7809	no	up	0.0145	0.0216	0.0075	0.139173	0	0.019619	0	0.014148	0	0	0	0	0	0.040357	0.019393	0	0	0	0
g__Sphingomonadaceae_unclassified	-1.62	0.6293	0.7832	no	down	0.0224	0.011	0.0338	0	0.021538	0.044144	0	0.01238	0	0.009883	0	0	0	0	0.090502	0	0.179932	0	0
g__Dongia	-1.2	0.6293	0.7832	no	down	0.0125	0.0076	0.0175	0	0.018461	0	0.009168	0.003537	0.029679	0	0	0	0	0	0	0	0.059977	0	0.079776
g__Klebsiella	-0.85	0.644	0.7832	no	down	0.0214	0.0153	0.0275	0.114509	0	0	0	0	0	0.008236	0	0	0	0	0	0.219746	0	0	0
g__Alistipes	-0.47	0.644	0.7832	no	down	0.0177	0.0149	0.0206	0.033472	0	0	0	0	0	0	0.085456	0	0	0	0	0.164809	0	0	0
g__Parabacteroides	-2.12	0.644	0.7832	no	down	0.0176	0.0066	0.0286	0	0	0	0	0.04775	0	0	0.005341	0	0	0	0	0.229163	0	0	0
g__Lachnospiraceae_unclassified	-0.21	0.644	0.7832	no	down	0.0132	0.0122	0.0141	0.008808	0	0	0	0	0	0	0.089017	0	0	0	0	0.113012	0	0	0
g__Paracoccus	-0.08	0.644	0.7832	no	down	0.0107	0.0104	0.011	0	0	0	0	0.08312	0	0	0	0.047028	0	0	0	0.04081	0	0	0
g__Intestinimonas	-1.13	0.644	0.7832	no	down	0.0088	0.0055	0.012	0	0	0	0	0.022991	0	0	0.021364	0	0	0	0	0.095746	0	0	0
g__Ruminococcaceae_UCG-002	-0.32	0.644	0.7832	no	down	0.0067	0.006	0.0075	0.02114	0	0	0	0	0	0	0.026705	0	0	0	0	0.059645	0	0	0
g__Betaproteobacteria_unclassified	2.24	0.644	0.7832	no	up	0.004	0.0066	0.0014	0	0	0	0	0.053055	0	0	0	0	0.003256	0	0.008081	0	0	0	0
g__Pigmentiphaga	-0.58	0.644	0.7832	no	down	0.003	0.0024	0.0036	0	0	0.014715	0.004584	0	0	0	0	0	0	0	0.02909	0	0	0	0
g__Simkaniaceae_unclassified	0.95	0.644	0.7832	no	up	0.002	0.0027	0.0014	0	0.021538	0	0	0	0	0	0	0	0.003256	0	0	0	0	0.007903	0
g__Methylophilus	0.17	0.6744	0.8031	no	up	2.0486	2.1664	1.9309	2.47516	2.2892	1.01203	1.18573	1.92767	2.12944	2.69803	3.61409	1.12172	2.38863	0.497732	4.6754	2.93518	3.13346	0.123287	0.571418
g__Novosphingobium	-0.27	0.6744	0.8031	no	down	0.8294	0.753	0.9058	0.801564	1.26921	0.170035	0.195584	0.592448	1.02947	0.700038	1.26582	1.31506	0.688746	1.41056	0.58988	0.494428	0.579295	1.25026	0.91835
g__Comamonas	0.08	0.6744	0.8031	no	up	0.587	0.6038	0.5702	1.07462	0.667682	0.511739	0.467568	0.079583	0.339448	0.5485	1.1412	0.498154	0.354956	0.046122	1.32198	1.00612	1.18053	0	0.153986
g__Aeromicrobium	-0.38	0.6744	0.8031	no	down	0.1792	0.156	0.2024	0.401663	0.121537	0.071938	0.039728	0.145017	0.165087	0.169656	0.133526	0.083606	0.197017	0.219079	0.06626	0.083189	0.601238	0.279767	0.089052
g__Cutibacterium	-1.21	0.6744	0.8031	no	down	0.0665	0.0401	0.093	0.008808	0.010769	0.021254	0.025976	0.109647	0	0.085652	0.058751	0.033094	0.032565	0.003843	0.038787	0.128708	0.017554	0.003161	0.486076
g__Porphyrobacter	-0.88	0.7365	0.8711	no	down	0.0399	0.0281	0.0516	0.149743	0	0.024524	0	0.014148	0	0.036237	0	0	0.034193	0.146053	0	0	0	0.02687	0.205933
g__Arthrobacter	-0.89	0.7422	0.8711	no	down	0.0295	0.0206	0.0383	0.003523	0	0	0.080984	0	0.053792	0.026354	0	0	0.011398	0	0.021009	0.04081	0	0.226026	0.007421
g__Methylophilaceae_unclassified	-1.64	0.7463	0.8711	no	down	0.052	0.0253	0.0788	0	0.061538	0	0.02292	0.060129	0.033388	0.003294	0.021364	0	0	0.021139	0	0.069063	0	0.05374	0.486076
g__Burkholderia-Caballeronia-Paraburkholderia	-2.13	0.7509	0.8711	no	down	0.1275	0.0475	0.2076	0	0.113844	0	0.051952	0.01238	0.016694	0.003294	0.181595	0.273462	0.043962	0	0.021009	0	0.002926	0.018967	1.30053
g__Rhodopseudomonas	0.64	0.7509	0.8711	no	up	0.0873	0.1064	0.0682	0.056374	0.318457	0.037604	0	0.076046	0.235573	0.12683	0	0	0	0.07687	0.069493	0.16324	0.067292	0.162802	0.005566
g__Hydrogenophaga	-0.29	0.7527	0.8711	no	down	0.1995	0.1794	0.2196	0.421042	0.112306	0.016349	0.187944	0.2246	0.10202	0.102123	0.268832	0.499895	0.210043	0.626489	0.08727	0.087898	0.179932	0.020548	0.044526
g__Aquabacterium	0.23	0.7527	0.8711	no	up	0.1009	0.1089	0.0929	0.155028	0.12769	0.088287	0.174192	0.01238	0.025969	0.009883	0.277733	0.024385	0.024424	0	0.185853	0.226024	0.212115	0.011064	0.059368
g__Methylophaga	2.56	0.7826	0.8984	no	up	0.0234	0.04	0.0068	0	0.193843	0	0	0	0.126134	0	0	0	0.03745	0	0	0.017266	0	0	0
g__Reyranella	0.87	0.7826	0.8984	no	up	0.0128	0.0165	0.009	0.061659	0	0.070303	0	0	0	0	0	0	0.034193	0	0	0	0	0.037934	0
g__Lactobacillus	-4.24	0.7984	0.9093	no	down	0.0893	0.009	0.1695	0.014093	0	0	0	0.04775	0	0.009883	0	0	0	0	0	0.029823	0	0	1.32651
g__Acidobacteria_unclassified	0.51	0.7984	0.9093	no	up	0.0244	0.0287	0.0201	0.144458	0	0	0	0.084888	0	0	0	0	0.130259	0	0	0	0.013166	0.017387	0
g__Limnobacter	-0.8	0.817	0.9268	no	down	0.0401	0.0292	0.051	0	0.092306	0	0.077928	0	0.063067	0	0	0	0	0.280575	0	0.03924	0.064366	0	0.024118
g__Stenotrophomonas	-1.71	0.8225	0.9294	no	down	0.0367	0.0172	0.0561	0.098654	0	0.027794	0.00764	0.003537	0	0	0	0.073155	0	0.359367	0	0	0.007314	0	0.009276
g__Pseudoxanthomonas	-1.1	0.8564	0.9338	no	down	0.0264	0.0168	0.0359	0	0.032307	0	0.050424	0.051287	0	0	0	0	0.104207	0	0.021009	0	0.162378	0	0
g__Proteobacteria_unclassified	-0.24	0.8903	0.9338	no	down	0.0138	0.0127	0.015	0.077514	0	0	0	0	0.024114	0	0	0	0	0	0.02909	0	0.090698	0	0
g__Neisseria	-1.17	0.8903	0.9338	no	down	0.0097	0.006	0.0135	0	0	0.00327	0	0	0.044518	0	0	0	0	0.101853	0	0	0.005851	0	0
g__Sediminibacterium	1.74	0.8984	0.9338	no	up	0.0442	0.068	0.0204	0	0.343072	0	0	0	0	0	0.201179	0	0.063501	0	0	0	0.084846	0	0.014842
g__Anaerosolibacter	-0.74	0.9079	0.9338	no	down	0.0169	0.0127	0.0212	0	0	0.019619	0	0.01238	0.029679	0.039532	0	0.109733	0	0	0	0	0.017554	0.042676	0
g__Acidimicrobiaceae_unclassified	1	0.9107	0.9338	no	up	0.045	0.0601	0.03	0	0	0.044144	0.013752	0.086657	0	0.336018	0	0.03832	0	0.128757	0.024242	0.048658	0	0	0
g__Acinetobacter	-0.17	0.9164	0.9338	no	down	13.4969	12.7027	14.2911	19.4983	16.6367	10.449	4.39147	8.64621	10.6806	12.0917	19.2277	3.35644	21.4537	3.24775	35.4413	22.6417	18.7378	2.68228	6.76796
g__Dechloromonas	-0.24	0.9164	0.9338	no	down	0.5047	0.4633	0.546	0.533789	0.549222	0.201099	0.059592	0.51994	0.500825	0.553442	0.788691	1.39692	0.340302	0.824429	0.237568	0.299796	0.269167	0.663853	0.335801
g__Dialister	-4.58	0.9273	0.9338	no	down	0.0474	0.0038	0.091	0	0	0	0	0	0	0	0.030266	0	0	0	0	0.7283	0	0	0
g__Ruminococcus]_gnavus_group	-3.08	0.9273	0.9338	no	down	0.0387	0.0082	0.0693	0	0	0	0	0.065435	0	0	0	0	0	0	0	0.554073	0	0	0
g__Prevotella	-5.91	0.9273	0.9338	no	down	0.0305	0.001	0.06	0	0	0.008175	0	0	0	0	0	0	0	0	0	0.480301	0	0	0
g__Porphyromonas	-5.05	0.9273	0.9338	no	down	0.0256	0.0015	0.0496	0	0	0	0	0.01238	0	0	0	0	0	0	0	0.397112	0	0	0
g__Dechlorosoma	-3.43	0.9273	0.9338	no	down	0.0212	0.0036	0.0388	0	0	0	0.029032	0	0	0	0	0.31004	0	0	0	0	0	0	0
g__Pedobacter	2.17	0.9273	0.9338	no	up	0.0124	0.0203	0.0045	0.162075	0	0	0	0	0	0	0	0	0	0	0	0	0	0.036354	0
g__Eubacterium]_coprostanoligenes_group	1.2	0.9273	0.9338	no	up	0.0094	0.0131	0.0057	0	0	0	0	0	0	0	0.10504	0	0	0	0	0.045519	0	0	0
g__Anaerotruncus	-0.46	0.9273	0.9338	no	down	0.0079	0.0067	0.0092	0	0	0	0	0	0	0	0.05341	0	0	0	0	0.073772	0	0	0
g__Phascolarctobacterium	-0.87	0.9273	0.9338	no	down	0.0079	0.0056	0.0102	0	0	0	0	0	0	0	0.044509	0.081864	0	0	0	0	0	0	0
g__Allorhizobium-Neorhizobium-Pararhizobium-Rhizobium	1.6	0.9273	0.9338	no	up	0.0052	0.0079	0.0026	0	0.063076	0	0	0	0	0	0	0	0	0	0	0	0.02048	0	0
g__Agrobacterium	2	0.9273	0.9338	no	up	0.005	0.008	0.002	0	0	0.063763	0	0	0	0	0	0	0.016282	0	0	0	0	0	0
g__Gracilibacteria_unclassified	1.3	0.9273	0.9338	no	up	0.0049	0.0069	0.0028	0	0	0	0.055008	0	0	0	0	0	0	0	0.022626	0	0	0	0
g__Lachnospiraceae_ND3007_group	-0.63	0.9273	0.9338	no	down	0.0048	0.0038	0.0059	0	0	0	0	0	0	0	0.030266	0	0.047219	0	0	0	0	0	0
g__Blautia	1.79	0.9273	0.9338	no	up	0.0044	0.0069	0.002	0	0	0	0	0	0	0	0.055191	0	0	0	0	0.015696	0	0	0
g__Rubellimicrobium	-0.74	0.9273	0.9338	no	down	0.0044	0.0033	0.0055	0	0.026153	0	0	0	0	0	0	0	0	0.0442	0	0	0	0	0
g__Geodermatophilus	0.81	0.9273	0.9338	no	up	0.0044	0.0056	0.0032	0	0.044615	0	0	0	0	0	0	0	0	0	0	0	0	0.02529	0
g__Ensifer	3.29	0.9273	0.9338	no	up	0.0043	0.0078	0.0008	0	0	0	0	0	0	0.062592	0	0	0	0	0	0	0	0.006322	0
g__Desulfosporosinus	1.4	0.9273	0.9338	no	up	0.004	0.0058	0.0022	0	0	0	0	0	0	0.04612	0	0	0	0	0.017777	0	0	0	0
g__Roseateles	2.64	0.9273	0.9338	no	up	0.0029	0.005	0.0008	0	0.039999	0	0	0	0	0	0	0	0	0	0	0.006278	0	0	0
g__Rothia	3.61	0.9273	0.9338	no	up	0.0026	0.0049	0.0004	0	0	0	0	0	0.038953	0	0	0	0	0	0	0.003139	0	0	0
g__Chryseobacterium	-3.21	0.9273	0.9338	no	down	0.0021	0.0004	0.0037	0	0	0	0	0	0	0	0.003561	0	0.029308	0	0	0	0	0	0
g__Prevotella_6	-1	0.9273	0.9338	no	down	0.0016	0.0011	0.0022	0.008808	0	0	0	0	0	0	0	0	0	0	0	0.017266	0	0	0
g__Rhizobium	-0.35	0.9273	0.9338	no	down	0.0013	0.0011	0.0014	0	0	0	0	0	0	0	0.008902	0	0.011398	0	0	0	0	0	0
g__Nocardioides	-0.62	0.9519	0.9552	no	down	0.0156	0.0123	0.0189	0.066944	0.023077	0	0	0	0	0.008236	0	0	0	0.042278	0.003232	0	0	0.1059	0
g__Sphingosinicella	-0.23	1	1	no	down	0.1212	0.1114	0.131	0.318864	0.187689	0.027794	0.035144	0.10611	0.074196	0.031296	0.110381	0	0.115605	0.049965	0.02909	0.084759	0.497374	0.060063	0.211499
